# Supplementary material for: Improvements in micelle promoted DNA-encoded library synthesis by surfactant optimisation
Source: Royal Society of Chemistry journal article supplement (doi:10.1039/d5ob00864f), 2025-01-01
Supplement: d5ob00864f1.pdf [file d5ob00864f1.pdf]

# Table of Contents

## Contents

|                                                                                         |     |
|-----------------------------------------------------------------------------------------|-----|
| <b>Table of Contents</b> .....                                                          | 1   |
| <b>Materials and Methods</b> .....                                                      | 2   |
| Solvents and Reagents .....                                                             | 2   |
| Analytical Techniques .....                                                             | 2   |
| Chromatography and Equipment .....                                                      | 3   |
| <b>General Procedures</b> .....                                                         | 3   |
| General DNA Headpiece Procedure .....                                                   | 3   |
| General Ethanol Precipitation Procedure for DNA Purification .....                      | 4   |
| General on-DNA EDC/Sulfo-NHS Amide Coupling Procedure .....                             | 4   |
| General on-DNA Suzuki-Miyaura Cross-Coupling Procedure .....                            | 4   |
| General on-DNA Reductive Amination Procedure .....                                      | 5   |
| General on-DNA Reverse Amide Coupling Procedure .....                                   | 5   |
| <b>Surfactant Map Development</b> .....                                                 | 5   |
| <b>List of surfactants</b> .....                                                        | 7   |
| <b>Principal component analysis</b> .....                                               | 18  |
| <b>Guide to using the <i>surfactant_map</i></b> .....                                   | 21  |
| <b>Python and R code</b> .....                                                          | 21  |
| <b>On-DNA Synthesis of HP1–5</b> .....                                                  | 25  |
| <b>On-DNA Suzuki-Miyaura Cross-Coupling Reaction</b> .....                              | 27  |
| On-DNA Suzuki-Miyaura Cross-Coupling Reaction of DNA-Conjugated Bromopyrazole HP1 ..... | 27  |
| On-DNA Suzuki-Miyaura Cross-Coupling Reactions of DNA-Conjugated Iodo HP4 .....         | 32  |
| <b>On-DNA Reductive Amination Reaction of DNA-Conjugated Amine HP2</b> .....            | 66  |
| <b>On-DNA Reverse Amide Coupling Reaction of DNA-Conjugated Acid HP3</b> .....          | 97  |
| <b>Representative Encoded Compound Synthesis</b> .....                                  | 121 |
| <b>1x1x1 Library Synthesis</b> .....                                                    | 124 |

## Materials and Methods

### Solvents and Reagents

Reagents were purchased from Acros Organics, Alfa Aesar, Apollo Scientific, BLD Pharmatech, Enamine, Fluka, Fluorochem, Lancaster Synthesis, Manchester Organics, Maybridge, Novabiochem, Sigma-Aldrich; buffer components and reducing agents from Alfa Aesar, Fisher Scientific, and Sigma-Aldrich; and TPGS-750-M from Sigma-Aldrich. All chemicals were used without further purification. Bottles of anhydrous solvents using SureSeal™ were purchased from Sigma-Aldrich. All water used alongside DNA substrates was nuclease-free, DEPC-treated water purchased from ThermoFisher. Solid-supported 14mer DNA and corresponding complementary strand were custom synthesised by Sigma-Aldrich and supplied as solid-supported crude material and single-stranded DNA after desalting, respectively.

### Analytical Techniques

DNA mass spectrometry was conducted on an Agilent 6550 QTOF in negative mode, using a standard 3200 m/z maximum and a 2 GHz extended dynamic range. Drying gas temperature was 260 °C at 12 L/min, sheath gas temperature was 400 °C at 12 L/min, nebulizer at 45 psig, VCap voltage of 4000 V, and nozzle voltage of 2000 V. The LC was carried out on an Agilent 1260 infinity 2 using an Agilent Advancedbio oligonucleotides column, 2.1x100 mm where the gradient was run at either:

A) 0.45 mL/min from 40–70% MeOH over 4.5 mins against a 25 mM HFIP:15 mM hexylamine buffer solution.

B) 0.8 mL/min from 20–70% MeOH over 3.5 mins against a 200 mM HFIP:8 mM triethylamine buffer solution.

C) 0.8 mL/min from 10–50% MeOH over 3.5 mins against a 200 mM HFIP:8 mM triethylamine buffer solution.

D) 0.4 mL/min from 10–40% MeOH over 10 mins against a 200 mM HFIP:8 mM triethylamine buffer solution.

All methods were followed by a 1.5 min flush at 95% MeOH.

Analysis of data was carried out by Agilent Qualitative Analysis version 7.

Calculated exact masses were quoted from ChemDraw Professional 18.1. Conversions were determined by integrating peaks in TIC chromatograms for starting material and all products. The proportion of desired product was determined by integrating all peaks, including starting material. Both conversion and desired product were reported as a percentage of all components detected. \*Indicates the calculated observed mass based on the observed mass of the complementary strand.

DNA concentrations were calculated using a NanoDrop™ One/OneC Microvolume UV-Vis Spectrophotometer with a 1 µL sample loading.

Gel electrophoresis was conducted using prepacked E-Gel® EX 4% Agarose Gels on an Invitrogen™ E-Gel™ Power Snap Electrophoresis Device, using Invitrogen™ E-Gel™ Ultra Low Range DNA Ladders.

## Chromatography and Equipment

Preparative HPLC purification was undertaken on an Agilent 1260 infinity system using a Phenomenex Clarity 5  $\mu\text{m}$  Oligo-RP column, 10x150 mm. The gradient was run at 5 mL/min from 10–95% MeOH over 20 mins against a 50 mM HFIP : 15 mM DIPEA buffer solution. Fractions were analysed at 254 nm wavelength.

Ligations and phosphorylations were carried out using an Applied Biosystems™ ProFlex™ PCR System, 96-well. PCR was carried out using a Bio-Rad CFX Opus 96 Real-Time PCR System.

Unless otherwise specified, centrifugation was undertaken at 13,400 rpm using an Eppendorf™ Centrifuge MiniSpin®, non-refrigerated, except for ethanol precipitations, which were undertaken at 15,000 rpm using an Eppendorf™ Centrifuge 5424 R at 4 °C.

## General Procedures

### General DNA Headpiece Procedure

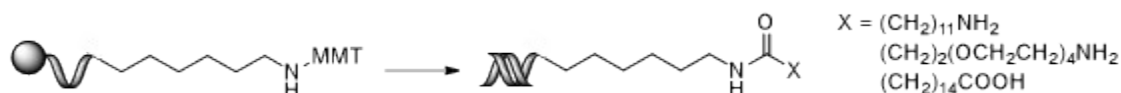

The average loading of single-stranded DNA attached to solid support was found by cleavage from the solid support using the below method and repeating 3 times. Nanodrop concentration of cleaved DNA showed that 103 mg resulted in 2  $\mu\text{mol}$  of DNA. The single-stranded DNA used was a 14mer (GTCTTGCCGAATTC) with a 5' MMT amino C6 linker bound to solid support at the 3' end.

### MMT Deprotection

The solid-supported DNA (103 mg, ca. 2  $\mu\text{mol}$ ) was washed with 5% TCA in DCM (20 x 400  $\mu\text{L}$ ). Successful removal of the protecting group was complete once the yellow colour subsided, and the solid-supported DNA was subsequently washed with DCM (14 x 400  $\mu\text{L}$ ). The beads were allowed to air dry (2 h) before being carried through to the next step without further analysis or purification.

### Linker Coupling

To a 1.5 mL Eppendorf™ Polypropylene DNA LoBind Tube was added HATU (17 mg, 44  $\mu\text{mol}$ ), either 12-((((9H-fluoren-9-yl)methoxy)carbonyl)amino)dodecanoic acid (18 mg, 40  $\mu\text{mol}$ ), 1-(9H-fluoren-9-yl)-3-oxo-2,7,10,13,16-pentaoxa-4-azanonadecan-19-oic acid (23 mg, 40  $\mu\text{mol}$ ), or 16-(tert-butoxy)-16-oxohexadecanoic acid (14 mg, 40  $\mu\text{mol}$ ); and DIPEA (17  $\mu\text{L}$ , 100  $\mu\text{mol}$ ) in DMF (1 mL). The reaction mixture was vortexed at room temperature for 15 mins before addition of the deprotected, solid-supported DNA (ca. 2  $\mu\text{mol}$ ) and the reaction mixture vortexed at room temperature for 20 h. The reaction mixture was filtered and washed with DMF (3 x 0.5 mL), MeCN (3 x 0.5 mL), MeOH (3 x 0.5 mL) and DCM (3 x 0.5 mL) and allowed to air dry (1 h). The product was carried through to the next step without further analysis or purification.

### Cleavage from Solid Support

To a 1.5 mL Eppendorf™ Polypropylene DNA LoBind Tube was added 40 wt% aqueous methylamine solution (0.5 mL) and 33% aqueous ammonia solution (0.5 mL) and the mixture vortexed at room temperature for 15 mins. The solid-supported, linker-bound DNA (ca. 2  $\mu\text{mol}$ ) was added and the reaction mixture vortexed at room temperature for 5 h. The reaction mixture was filtered and washed

with DEPC-treated water (3 x 0.5 mL). The resulting mixture was concentrated under N<sub>2</sub> and purified by preparative HPLC (10–90% MeOH in 50 mM HFIP : 15 mM DIPEA buffer solution over 16 mins) to afford the desired compound as a white solid.

#### t-Butyl Ester Hydrolysis (HP3 only)

To the linker-bound DNA HP3 t-butyl ester (3 equiv.) was added LiOH (1 M in H<sub>2</sub>O, 1 equiv.) and the reaction mixture stirred and heated to 80 °C for 100 mins. The reaction mixture was allowed to cool to room temperature, before being added to an Amicon Ultra-0.5 Centrifugal 3 kDa Cut-off Filter Unit and centrifuged at room temperature for 10 mins. DEPC-treated water (350 µL) was added to the filter and the mixture centrifuged at room temperature for 10 mins. This was repeated a further 2 times before the filter was inverted and centrifuged at room temperature for 2 mins to yield the aqueous DNA product. The product was purified via preparative HPLC (10–90% MeOH over 16 mins against a 50 mM HFIP : 15 mM DIPEA buffer solution) to afford the desired compound as a white solid.

#### Complementary Strand Annealing

The complementary 14mer (GAATTCGGCAAGAC), 3' and 5' hydroxylated (1.0 mM in H<sub>2</sub>O, 1 equiv.), and linker-bound DNA (1 equiv.) were heated to 80 °C for 30 mins. The reaction mixture was allowed to cool to room temperature, and the double-stranded DNA concentrated under N<sub>2</sub> at rt to form a 1–4 mM solution of PEG–amine HP5, HP2 or HP3. Mass spectrum analysis confirmed product formation.

#### General Ethanol Precipitation Procedure for DNA Purification

To the DNA product was added aq. NaCl (5 M in H<sub>2</sub>O, 0.1 v/v) and ice-cold EtOH (3 v/v) and the mixture vortexed and incubated at -20 °C overnight. The mixture was centrifuged at 4 °C for 15 mins and the supernatant decanted. 70% v/v aq. ice-cold EtOH (200 µL) was added and the mixture centrifuged at 4 °C for 10 mins. The supernatant was decanted to afford the DNA product as a pellet, which was allowed to air dry for 1 h before being redissolved in H<sub>2</sub>O.

#### General on-DNA EDC/Sulfo-NHS Amide Coupling Procedure

To a 1.5 mL Eppendorf™ Polypropylene DNA LoBind Tube was added carboxylic acid (200 mM in DMSO, 12 µL), DMSO (50 µL), EDC.HCl (100 mM in DMSO, 12 µL), and *N*-Hydroxysulfosuccinimide sodium salt (100 mM in 2:1 DMSO:H<sub>2</sub>O, 12 µL) and the reaction mixture was vortexed at room temperature for 30 mins. DNA HP (1–50 nmol) in MOPS buffer (100 mM in H<sub>2</sub>O, pH=8.0, 50 µL) was added and the reaction mixture heated in a sand bath at 37 °C overnight. The reaction mixture was purified via the general ethanol precipitation procedure and analysed by mass spectrometry.

#### General on-DNA Suzuki-Miyaura Cross-Coupling Procedure

To a 50 µL glass insert for a Para-dox™ 96-well micro photoredox/optimisation plate was added a solution of boronic acid/ester (750 mM in DMF, 20 µL) and double-stranded DNA (1.5 µL, 1–2 nmol) and the solvents removed at 55 °C in a centrifugal evaporator for 30 mins. To this mixture was added surfactant (5 wt% in H<sub>2</sub>O, 24 µL) and potassium phosphate (2.67 M in H<sub>2</sub>O, 6 µL) and the vials vortexed for 10 s to enhance mixing. Pd(dtbpf)Cl<sub>2</sub> (50 mM in THF, 4.5 µL) was added and the reaction mixture vortexed for 10 s and heated in a Para-dox™ 96-well micro photoredox/optimisation plate at 60 °C for 5 h. The mixture was diluted to 200 µL H<sub>2</sub>O and washed with DCM (200 µL). The organic layer was removed and the aqueous layer filtered through a hydrophobic PTFE filter, purified via the general ethanol precipitation procedure. The precipitated product was added to an Amicon® Ultra-0.5 Centrifugal 3 kDa Cut-off Filter Unit, DEPC-treated water (350 µL) was added and the solution centrifuged at room temperature for 10 mins. DEPC-treated water (200 µL) was added to the filter and the mixture centrifuged at room temperature for 10 mins. This was repeated 2 more times, then

the filter was inverted and centrifuged at 4,300 rpm at room temperature for 2 mins to yield the aqueous DNA product which was analysed by mass spectrometry.

#### General on-DNA Reductive Amination Procedure

To a 0.5 mL Eppendorf™ Polypropylene DNA LoBind Tube was added DNA (5 µL, 0.5–5 nmol), borate buffer (5 µL, 350 mM, pH 10.8), surfactant (5 µL, 5 wt%) and aldehyde (6 µL, 400 mM in MeCN) and the mixture vortexed at room temperature for 10 s to enhance mixing. The mixture was then shaken using a STARLAB® Thermomixer-Mixer HC at 800 rpm at room temperature for 1.5 h. NaBH<sub>4</sub> (5 µL, 440 mM in 1:1 v/v MeCN/H<sub>2</sub>O) was added and the reaction mixture shaken at room temperature for a further 16 h. The reaction was then precipitated according to the general ethanol precipitation procedure and analysed by mass spectrometry.

#### General on-DNA Reverse Amide Coupling Procedure

To a 50 µL glass insert for a Para-dox™ 96-well micro photoredox/optimisation plate was added HOAt (2 mg, 15 µmol), amine (15 µmol), surfactant (5 wt% in H<sub>2</sub>O, 26 µL), DNA (4 µL, 1 nmol), 2,6-lutidine (5.2 µL, 45 µmol) and DIC (2.2 µL, 15 µmol) and the reaction mixture vortexed to enhance mixing and heated in a Para-dox™ 96-well micro photoredox/optimisation plate at 45 °C for 3 h. The mixture was diluted to 200 µL H<sub>2</sub>O and washed with DCM (200 µL). The organic layer was removed and the aqueous layer filtered through a hydrophobic PTFE filter, purified via the general ethanol precipitation procedure and analysed by mass spectrometry.

## Surfactant Map Development

Table S1. Descriptors for *surfactant\_map*

| Descriptor                           | Classification             | Representing                                    | Source       |
|--------------------------------------|----------------------------|-------------------------------------------------|--------------|
| Critical micelle concentration (CMC) | Micellar property          | Surfactant-surfactant interactions              | Literature   |
| Aggregation number range             | Micellar property          | Surfactant-surfactant interactions              | Literature   |
| Micelle size range                   | Micellar property          | Surfactant-surfactant interactions, homogeneity | Literature   |
| Contact angles                       | Emulsion property          | Surface tension and wettability                 | Experimental |
| Zeta potential                       | Emulsion/micellar property | Charge environment around micelles, emulsions   | Experimental |
| Hydrophilic Lipophilic Balance (HLB) | Emulsion property          | Emulsion stability                              | Literature   |
| Hydrophilic                          | Molecular                  | Flexibility of surfactant molecules and         | <i>rdkit</i> |

|                                           |                    |                                                                        |               |
|-------------------------------------------|--------------------|------------------------------------------------------------------------|---------------|
| fragment rotatable bonds                  | property           | emulsion flexibility/stability                                         |               |
| Hydrophobic fragment rotatable bonds      | Molecular property | Flexibility of surfactant molecules and emulsion flexibility/stability | <i>rdkit</i>  |
| Hydrophilic fragment longest chain length | Molecular property | Size of the interface layer between organic and aqueous phases         | <i>rdkit</i>  |
| Hydrophobic fragment longest chain length | Molecular property | Capability for stabilising organic phase inside emulsions              | <i>rdkit</i>  |
| Hydrophilic fragment volume               | Molecular property | Packing of surfactant molecules and stability of emulsion              | <i>rdkit</i>  |
| Hydrophobic fragment volume               | Molecular property | Packing of surfactant molecules and stability of emulsion              | <i>rdkit</i>  |
| Hydrophilic fragment surface area         | Molecular property | Packing of surfactant molecules and stability of emulsion              | <i>rdkit</i>  |
| Hydrophobic fragment surface area         | Molecular property | Packing of surfactant molecules and stability of emulsion              | <i>rdkit</i>  |
| Hydrophobic fragment number of C=C bonds  | Molecular property | Flexibility of surfactant molecules and emulsion flexibility/stability | <i>rdkit</i>  |
| Hydrophilic fragment number of OH groups  | Molecular property | Capability of H-bonding at the interface of organic and aqueous phases | <i>rdkit</i>  |
| Hydrophilic fragment $DG_{solv}$          | Molecular property | Stability of emulsion                                                  | Gaussian, PM6 |
| Hydrophilic fragment dipole moment        | Molecular property | Stability of emulsion                                                  | Gaussian, PM6 |
| Hydrophilic fragment HOMO energy          | Molecular property | H-bonding capability and interactions with transition states           | Gaussian, PM6 |
| Hydrophilic fragment LUMO energy          | Molecular property | H-bonding capability and interactions with transition states           | Gaussian, PM6 |
| Hydrophobic                               | Molecular          | Stability of emulsion                                                  | Gaussian,     |

|                                               |                    |                                     |                         |
|-----------------------------------------------|--------------------|-------------------------------------|-------------------------|
| fragment dipole moment                        | property           |                                     | PM6                     |
| Hirshfeld charge for most negative heteroatom | Molecular property | Interactions with transition states | Gaussian, PM6, multiwfn |

## List of surfactants

Table S2. Full list of surfactants in this study

| No. | Name           | Structure                                                                                         |
|-----|----------------|---------------------------------------------------------------------------------------------------|
| 1   | Polysorbate 20 | $W + X + Y + Z = 20$                                                                              |
| 2   | Polysorbate 40 | $W + X + Y + Z = 20$                                                                              |
| 3   | Polysorbate 60 | $W + X + Y + Z = 20$                                                                              |
| 4   | Polysorbate 80 | $W + X + Y + Z = 20$                                                                              |
| 5   | Tween 65       | $W + X + Y + Z = 20$ $R = \text{CH}_3\text{C}(=\text{O})\text{CH}_2(\text{CH}_2)_{15}\text{CH}_3$ |

|    |                               |                                                                                                                       |
|----|-------------------------------|-----------------------------------------------------------------------------------------------------------------------|
| 6  | Tween 85                      | $W + X + Y + Z = 20$ $R = \text{CH}_3\text{C}(=\text{O})(\text{CH}_2)_7\text{CH}=\text{CH}(\text{CH}_2)_7\text{CH}_3$ |
| 7  | Span 20                       | $\text{C}_{11}\text{H}_{23}$                                                                                          |
| 8  | Span 40                       | $\text{C}_{15}\text{H}_{31}$                                                                                          |
| 9  | Span 60                       | $\text{C}_{17}\text{H}_{35}$                                                                                          |
| 10 | Span 80                       | $\text{C}_{17}\text{H}_{35}$                                                                                          |
| 11 | Span 65                       | $R = \text{CH}_3\text{C}(=\text{O})\text{CH}_2(\text{CH}_2)_{15}\text{CH}_3$                                          |
| 12 | Span 85                       | $R = \text{CH}_3\text{C}(=\text{O})(\text{CH}_2)_7\text{CH}=\text{CH}(\text{CH}_2)_7\text{CH}_3$                      |
| 13 | C8E6                          | $\text{C}_8\text{H}_{17}(\text{OCH}_2\text{CH}_2)_6\text{OH}$                                                         |
| 14 | Octaethylene glycol monodecyl | $\text{C}_{10}\text{H}_{21}(\text{OCH}_2\text{CH}_2)_8\text{OH}$                                                      |



|    |                                             |                                                                                      |
|----|---------------------------------------------|--------------------------------------------------------------------------------------|
| 15 | Brij 30                                     | $C_{12}H_{25}(OCH_2CH_2)_4OH$                                                        |
| 16 | C12E5                                       | $C_{12}H_{25}(OCH_2CH_2)_5OH$                                                        |
| 17 | C12E6                                       | $C_{12}H_{25}(OCH_2CH_2)_6OH$                                                        |
| 18 | Brij 35                                     | $C_{12}H_{25}(OCH_2CH_2)_{23}OH$                                                     |
| 19 | Octaethylene glycol<br>monotetradecyl ether | $C_{14}H_{29}(OCH_2CH_2)_8OH$                                                        |
| 20 | SP Brij C2 MBAL/Brij 52                     | $C_{16}H_{33}(OCH_2CH_2)_2OH$                                                        |
| 21 | C16E8                                       | $C_{16}H_{33}(OCH_2CH_2)_8OH$                                                        |
| 22 | Brij 56                                     | $C_{16}H_{33}(OCH_2CH_2)_{10}OH$                                                     |
| 23 | Brij 58                                     | $C_{16}H_{33}(OCH_2CH_2)_{20}OH$                                                     |
| 24 | Brij 72                                     | $C_{18}H_{37}(OCH_2CH_2)_2OH$                                                        |
| 25 | C18E8                                       | $C_{18}H_{37}(OCH_2CH_2)_8OH$                                                        |
| 26 | Brij S-10                                   | $C_{18}H_{37}(OCH_2CH_2)_{10}OH$                                                     |
| 27 | Brij 93                                     | 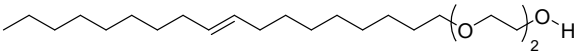 |
| 28 | Brij O10                                    |  |
| 29 | Brij 99                                     |  |
| 30 | Brij S20                                    | $C_{18}H_{37}(OCH_2CH_2)_{20}OH$                                                     |
| 31 | Brij 721                                    | $C_{18}H_{37}(OCH_2CH_2)_{21}OH$                                                     |
| 32 | Brij 700                                    | $C_{18}H_{37}(OCH_2CH_2)_{100}OH$                                                    |

|    |                |                                                                                      |
|----|----------------|--------------------------------------------------------------------------------------|
| 33 | Triton-X-15    | 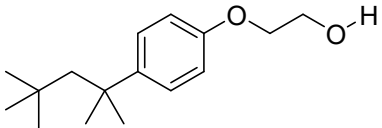   |
| 34 | Triton-X-35    |    |
| 35 | Triton-X-45    |    |
| 36 | Triton-X-100   |    |
| 37 | Triton-X-102   |   |
| 38 | Triton-X-114   |  |
| 39 | Triton-X-165   |  |
| 40 | Triton-X-305 ( |  |
| 41 | Triton-X-405   |  |
| 42 | Triton-X-705   |  |

|    |                               |  |
|----|-------------------------------|--|
| 43 | IGEPAL CA720                  |  |
| 44 | IGEPAL CO520                  |  |
| 45 | IGEPAL CO630                  |  |
| 46 | IGEPAL CO720                  |  |
| 47 | Myrj S8                       |  |
| 48 | Myrj S20                      |  |
| 49 | Myrj 52                       |  |
| 50 | Myrj 53                       |  |
| 51 | Myrj 59                       |  |
| 52 | DDM (N-Dodecyl b-D-maltoside) |  |
| 53 | Nonyl b-D-glucopyranoside     |  |

|    |                                                   |                                                                                      |
|----|---------------------------------------------------|--------------------------------------------------------------------------------------|
| 54 | Sucrose monolaurate                               | 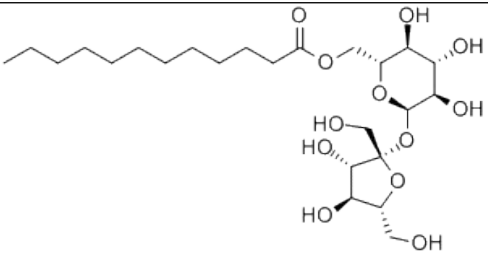   |
| 55 | Sucrose Distearate                                |    |
| 56 | CTAB                                              |   |
| 57 | CTAC                                              |  |
| 58 | DTAB                                              |  |
| 59 | DTAC                                              |  |
| 60 | TTAC                                              |  |
| 61 | TTAB                                              |  |
| 62 | CPC ((1-Hexdecyl)pyridinium chloride monohydrate) |  |
| 63 | DDAB (Di-n-dodecyl)dimethyl ammonium bromide)     |  |

|    |                                                                         |                                                                                      |
|----|-------------------------------------------------------------------------|--------------------------------------------------------------------------------------|
| 64 | CHAPS (3-((3-cholamidopropyl)dimethylammonio)-1-propanesulfonate)       | 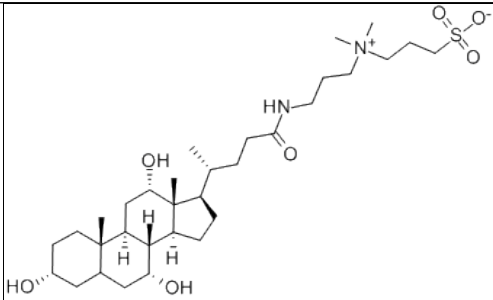   |
| 65 | DAPS (N-dodecyl-N,N-dimethyl-3-ammonium-1-propane sulfonate)            |    |
| 66 | 3-(N,N-Dimethylmyristylammonio)propanesulfonate                         |    |
| 67 | Sulfobetaine-16                                                         |    |
| 68 | Lauryldimethylammonio)acetate                                           |   |
| 69 | TPGS-750-M                                                              |  |
| 70 | TPGS-1000 (DL-alpha-Tocopherolmethoxypolyethyleneglycol 1000 succinate) |  |
| 71 | SPGS-550-M                                                              |  |
| 72 | PSS                                                                     |  |

|    |                                      |  |
|----|--------------------------------------|--|
| 73 | PTS                                  |  |
| 74 | Coolade                              |  |
| 75 | PS-750-M                             |  |
| 76 | Sodium Octanoate/Sodium caprylate    |  |
| 77 | Sodium decanoate                     |  |
| 78 | Sodium Laurate                       |  |
| 79 | Palmitic acid sodium salt            |  |
| 80 | Sodium Stearate                      |  |
| 81 | Sodium Oleate                        |  |
| 82 | 1-Decanesulfonic acid, sodium salt   |  |
| 83 | 1-Dodecanesulfonic acid, sodium salt |  |
| 84 | Sodium 1-tetradecanesulfonate        |  |
| 85 | Sodium 1-hexadecanesulfonate         |  |

|    |                                     |                                                                                      |
|----|-------------------------------------|--------------------------------------------------------------------------------------|
| 86 | n-Decyl sodium sulfate              | 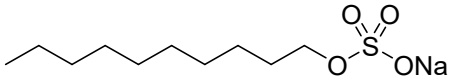   |
| 87 | SDS                                 |    |
| 88 | Sodium-1-tetradecyl sulfate         |    |
| 89 | Sodium Hexadecyl sulfate            |    |
| 90 | Sodium n-octadecyl sulfate          |    |
| 91 | Sodium 4-n-octylbenzenesulfonate    |    |
| 92 | SDBS                                |   |
| 93 | 4-Dodecylbenzene sulfonic acid      |  |
| 94 | Diocetyl sulfosuccinate sodium salt |  |
| 95 | Dihexyl sodium sulfosuccinate       |  |
| 96 | Cithrol 10MS                        |  |
| 97 | Citrhol 4DS                         |  |





|    |                                          |    |                                                                         |
|----|------------------------------------------|----|-------------------------------------------------------------------------|
| 13 | Octaethylene glycol monodecyl            | 59 | 3-(N,N-Dimethylmyristylammonio)propanesulfonate                         |
| 14 | Brij 30                                  | 60 | Sulfobetaine-16                                                         |
| 15 | C12E5                                    | 61 | Lauryldimethylammonio)acetate                                           |
| 16 | C12E6                                    | 62 | TPGS-750-M                                                              |
| 17 | Brij 35                                  | 63 | TPGS-1000 (DL-alpha-Tocopherolmethoxypolyethyleneglycol 1000 succinate) |
| 18 | Octaethylene glycol monotetradecyl ether | 64 | SPGS-550-M                                                              |
| 19 | SP Brij C2 MBAL/Brij 52                  | 65 | PTS                                                                     |
| 20 | C16E8                                    | 66 | PS-750-M                                                                |
| 21 | Brij 56                                  | 67 | Sodium Octanoate/Sodium caprylate                                       |
| 22 | Brij 58                                  | 68 | Sodium decanoate                                                        |
| 23 | Brij S-10                                | 69 | Sodium Laurate                                                          |
| 24 | Brij 93                                  | 70 | Palmitic acid sodium salt                                               |
| 25 | Brij O10                                 | 71 | Sodium Stearate                                                         |
| 26 | Brij S20                                 | 72 | Sodium Oleate                                                           |
| 27 | Brij 721                                 | 73 | 1-Decanesulfonic acid, sodium salt                                      |
| 28 | Brij 700                                 | 74 | 1-Dodecanesulfonic acid, sodium salt                                    |
| 29 | Triton-X-15                              | 75 | Sodium 1-tetradecanesulfonate                                           |
| 30 | Triton-X-35                              | 76 | Sodium 1-hexadecanesulfonate                                            |
| 31 | Triton-X-45                              | 77 | n-Decyl sodium sulfate                                                  |
| 32 | Triton-X-100                             | 78 | SDS                                                                     |
| 33 | Triton-X-102                             | 79 | Sodium-1-tetradecyl sulfate                                             |
| 34 | Triton-X-114                             | 80 | Sodium Hexadecyl sulfate                                                |
| 35 | Triton-X-165                             | 81 | Sodium n-octadecyl sulfate                                              |
| 36 | Triton-X-305                             | 82 | Sodium 4-n-octylbenzenesulfonate                                        |
| 37 | Triton-X-405                             | 83 | SDBS                                                                    |
| 38 | Triton-X-705                             | 84 | 4-Dodecylbenzene sulfonic acid                                          |
| 39 | IGEPAL CA720                             | 85 | Diocetyl sulfosuccinate sodium salt                                     |

|    |                               |    |                               |
|----|-------------------------------|----|-------------------------------|
| 40 | IGEPAL CO520                  | 86 | Diethyl sodium sulfosuccinate |
| 41 | IGEPAL CO630                  | 87 | Cithrol 10MS                  |
| 42 | IGEPAL CO720                  | 88 | Cithrol 4DS                   |
| 43 | Myrj S8                       | 89 | Croduret 25-LQ                |
| 44 | Myrj S20                      | 90 | Croduret 50-SS                |
| 45 | Myrj 52                       | 91 | Crodasinic LS95               |
| 46 | DDM (N-Dodecyl b-D-maltoside) |    |                               |

## Principal component analysis

### Algorithms

**PPCA:** Probabilistic Principal Component Analysis is a method to estimate the principal axes when any data vector has one or more missing values.<sup>29,30</sup>

PPCA is based on an isotropic error model. It seeks to relate a  $p$ -dimensional observation vector  $y$  to a corresponding  $k$ -dimensional vector of latent (or unobserved) variable  $x$ , which is normal with mean zero and covariance  $I(k)$ . The relationship is

$$y = Wx + \mu + \varepsilon,$$

where  $y$  is the row vector of observed variable,  $x$  is the row vector of latent variables, and  $\varepsilon$  is the isotropic error term.  $\varepsilon$  is Gaussian with mean zero and covariance of  $v \cdot I(k)$ , where  $v$  is the residual variance. Here,  $k$  needs to be smaller than the rank for the residual variance to be greater than 0 ( $v > 0$ ). Standard principal component analysis, where the residual variance is zero, is the limiting case of PPCA. The observed variables,  $y$ , are conditionally independent given the values of the latent variables,  $x$ . So, the latent variables explain the correlations between the observation variables and the error explains the variability unique to a particular  $y_i$ . The  $p$ -by- $k$  matrix  $W$  relates the latent and observation variables, and the vector  $\mu$  permits the model to have a nonzero mean. PPCA assumes that the values are missing at random through the data set. This means that whether a data value is missing or not does not depend on the latent variable given the observed data values.

Under this model,

$$y \sim N(\mu, WWT + v \cdot I(k)).$$

There is no closed-form analytical solution for  $W$  and  $v$ , so their estimates are determined by iterative maximization of the corresponding loglikelihood using an expectation-maximization (EM) algorithm. This EM algorithm handles missing values by treating them as additional latent variables. At convergence, the columns of  $W$  spans the subspace, but they are not orthonormal. PPCA obtains the orthonormal coefficients, for the components by orthogonalization of  $W$ .

**BPCA:** Bayesian Principal Component Analysis combines an EM approach for PCA with a Bayesian model. In standard PCA data far from the training set but close to the principal subspace may have

the same reconstruction error. BPCA defines a likelihood function such that the likelihood for data far from the training set is much lower, even if they are close to the principal subspace.<sup>31</sup>

BPCA works iteratively, the complexity is growing with  $O(n^3)$  because several matrix inversions are required. The size of the matrices to invert depends on the number of components used for re-estimation.

Finding the optimal number of components for estimation is not a trivial task; the best choice depends on the internal structure of the data. A method called kEstimate is provided to estimate the optimal number of components via cross validation. In general few components are sufficient for reasonable estimation accuracy. See also the package documentation for further discussion about on what data PCA-based missing value estimation makes sense.

Details about the probabilistic model underlying BPCA are found in Oba et. al 2003.<sup>32</sup> The algorithm uses an expectation maximization approach together with a Bayesian model to approximate the principal axes (eigenvectors of the covariance matrix in PCA). The estimation is done iteratively, the algorithm terminates if either the maximum number of iterations was reached or if the estimated increase in precision falls below  $1e^{-4}$ .

Complexity: The relatively high complexity of the method is a result of several matrix inversions required in each step. Considering the case that the maximum number of iteration steps is needed, the approximate complexity is given by the term

Where  $row\_miss$  is the number of rows containing missing values and  $O(n^3)$  is the complexity for inverting a matrix of size  $components$ .  $components$  is the number of components used for re-estimation.

**NIPALS:** Nonlinear Iterative Partial Least Squares method is a method presented by Wold to allow principal component analysis with missing values.<sup>33</sup> The NIPALS algorithm is applied on the dataset and the obtained PCA model is used to predict the missing values.<sup>34</sup>

The NIPALS algorithm can be modified to accommodate missing values using the method of Martens and Martens (p. 381).<sup>35</sup>

If, for a certain variable  $k$  [column of  $X$ ], a missing value is encountered in  $X$  for a certain object  $i$  [row of  $X$ ], then the corresponding elements in  $t_{ih}$  must also be skipped in the calculation of the loadings, which for  $X$ -variable  $k$  is

$$p_{hk} = X_{k,h-1} t_h' / (t_h' t_h)$$

Likewise, if, for a certain sample  $i$  [row of  $X$ ], a missing value is encountered in  $X$  for a certain variable  $k$  [column of  $X$ ], then the corresponding elements in  $p_{kh}$  must also be skipped in calculating the scores, which for sample  $i$  is

$$t_{ih} = X_{i,h-1} p_h' / (p_h' p_h)$$

This method may have convergence problems if there are many missing values.

**NLPKA:** Nonlinear Principal Component Analysis is generally seen as a non-linear generalisation of standard linear principal component analysis. The principal components are generalised from straight lines to curves.<sup>36</sup>

The algorithm, proposed by Kramer,<sup>37</sup> is based on a multi-layer perceptron (deep neural network) with an auto-associative topology, also known as an autoencoder, replicator network, bottleneck or sand glass type network.

The network can be divided into two parts: the first part represents the extraction function  $\Phi_{extr}: X \rightarrow Z$ , whereas the second part represents the inverse function, the generation or reconstruction function  $\Phi_{gen}: Z \rightarrow \hat{X}$ . A hidden layer in each part enables the network to perform non-linear mapping functions.

The inverse NLPCA model can be easily extended to be applicable to incomplete datasets. If the  $i$ th element  $x_i^n$  of the  $n$ th sample vector  $x^n$  is missing, the partial error  $\sigma_i^n$  is set to zero before back-propagating; hence this error is ignored, and it has no contribution to the gradients. Thus, the non-linear components are extracted from all the available observations. With these components the original data can be reconstructed, including the missing values. The network output  $\hat{x}_i^n$  gives the estimation of the missing element  $x_i^n$ .

### PCA results

Due to missing data in the dataset for some experimental values a “traditional” PCA approach could not be used on the dataset. Instead, four PCA approaches which can be employed on incomplete datasets were trialled: Bayesian PCA (BPCA), probabilistic PCA (PPCA), non-linear PCA (NLPCA) and on-linear iterative partial least squares (NIPALS). The relevant code for data normalisation, PCA and plotting are in Section 4.

Table S4. NIPALS loadings for descriptors and PCs

| Descriptor                     | PC1                    | PC2      | PC3      |
|--------------------------------|------------------------|----------|----------|
| <i>Contact_angle_left</i>      | 0.119849               | 0.188936 | 0.146323 |
| <i>Contact_angle_right</i>     | 0.100006               | 0.197218 | 0.134578 |
| <i>Zeta_potential</i>          | -0.04506               | 0.156862 | 0.317523 |
| <i>Size_low</i>                | -0.0092                | 0.00593  | -0.0531  |
| <i>Size_high</i>               | $-1.61 \times 10^{-5}$ | 0.00063  | -0.05109 |
| <i>CMC</i>                     | -0.07685               | -0.03592 | -0.02751 |
| <i>Aggregation_number_low</i>  | -0.06601               | 0.102619 | 0.10661  |
| <i>Aggregation_number_high</i> | -0.04075               | 0.095504 | 0.12053  |
| <i>HLB</i>                     | -0.0652                | -0.11232 | 0.01585  |
| <i>Area_hydrophilic</i>        | 0.375622               | -0.23636 | 0.082023 |
| <i>Area_hydrophobic</i>        | 0.2979                 | 0.333079 | -0.09485 |
| <i>Volume_hydrophobic</i>      | 0.30495                | 0.325878 | -0.11382 |
| <i>Volume_hydrophilic</i>      | 0.36434                | -0.25371 | 0.114468 |

|                                         |          |          |          |
|-----------------------------------------|----------|----------|----------|
| <i>Rotatable_bonds_hydrophilic</i>      | 0.364517 | -0.25523 | 0.11818  |
| <i>Rotatable_bonds_hydrophobic</i>      | 0.285553 | 0.350459 | -0.08946 |
| <i>Longest_chain_length_hydrophilic</i> | 0.335862 | -0.29298 | 0.129539 |
| <i>Longest_chain_length_hydrophobic</i> | 0.27726  | 0.28896  | -0.0477  |
| <i>Philic_DeltaG_sol</i>                | 0.189123 | -0.26703 | 0.193799 |
| <i>Philic_Solv_dip</i>                  | 0.00501  | 0.033201 | -0.25541 |
| <i>Philic_HOMO</i>                      | 0.077073 | -0.14427 | -0.52856 |
| <i>Philic_LUMO</i>                      | 0.074148 | -0.17595 | -0.49362 |
| <i>Philic_Most_neg</i>                  | 0.053238 | 0.069546 | 0.298744 |
| <i>Phobic_Solv_dip</i>                  | 0.202227 | 0.126911 | -0.14908 |
| <i>Double_bonds_hydrophobic</i>         | 0.069898 | 0.137099 | -0.07263 |
| <i>OH_groups_hydrophilic</i>            | 0.042828 | -0.09282 | -0.04409 |

\*Contributors with coefficients above 0.15 are in green

### Guide to using the *surfactant\_map*

The map can be utilised for rational and rapid surfactant screening/optimisation for any given reactions. The step-by-step guide is provided below as guidelines for researchers less familiar with Principal Component Analysis maps. The process is summarised in Figure 5 of the manuscript.

**Step 1:** Select one surfactant as the initial surfactant. This can be a surfactant which enables the reaction in water from previous experiments, but the results need improvement. If no prior surfactant is known for the reaction, TPGS-750-M is generally a good surfactant to start with, which occupies a central position in the *surfactant\_map*.

**Step 2:** Select another 7-8 surfactants using the *surfactant\_map* to maximise the space covered by these surfactants. These surfactants will form *screen1*, and help guide the optimisation in *screen2* to the right area of the map. This can be done manually with the *surfactant\_map*, plotted in 3D, or automatically using the Python code in section 5.7. This code randomises the choices of surfactants to maximise the distance between them in the *surfactant\_map* with only the first selected surfactant being constant as a benchmark.

**Step 3:** Carry out *screen1* using the surfactants selected in Step 2. The best performing surfactants should be compared to identify the area in the *surfactant\_map* where the best results are obtained.

**Step 4:** Based on the results of *screen1*, 4-5 surfactants are manually selected around the best performing surfactants for *screen2*.

**Step 5:** Perform *screen2* and identify the best surfactant for the reaction, enabling further process optimisation through reaction conditions (*e.g.* temperature, concentration, etc.) and stoichiometry.

### Python and R code

#### Python code for surfactant selection

```

import pandas as pd
import math
import random

df = pd.read_csv("surfactant_map.csv")

# the numbering of the first surfactant hit for the reaction
hit_index = 26
# the total number of cycles for optimisation of covering surfactant space
max_cycles = 1000
# the number of surfactants to be selected in the screen
number_of_surfactants = 8

# function to calculate the distance in 3D space between two surfactants in PC1-3
def distance(index1, index2):
    pc1_1 = float(df['PC1'][index1-1])
    pc2_1 = float(df['PC2'][index1-1])

```

```

pc3_1 = float(df['PC3'][index1-1])
pc1_2 = float(df['PC1'][index2-1])
pc2_2 = float(df['PC2'][index2-1])
pc3_2 = float(df['PC3'][index2-1])
calc_distance = math.sqrt((pc1_1 - pc1_2)**2 + (pc2_1 - pc2_2)**2 + (pc3_1 -
pc3_2)**2)
return calc_distance

# Calculate sum of distances to index 1
def distance_sum(hit_indexes):
    sum_of_distances = 0
    for ind in df['Number']:
        distance_from_hit = 0
        if ind not in hit_indexes :
            distance_from_hit = 100
        for hit_ind in hit_indexes:
            individual_distance = distance(hit_ind, ind)
            # print (individual_distance)
            if individual_distance < distance_from_hit:
                distance_from_hit = individual_distance
        sum_of_distances = sum_of_distances + distance_from_hit
    return sum_of_distances

def all_hit_indexes():
    gen_hit_indexes = list(combinations(df['Number'], number_of_surfactants-1))
    all_hit_indexes = [list(elem) for elem in gen_hit_indexes] # convert into list of
lists
    return all_hit_indexes

# need a faster way of generating the first index_combinations = []
index_list = list(df['Number'])
index_list.remove(hit_index)
hit_indexes = []

```

```

for i in range (1, number_of_surfactants):
    random_item = random.choice(index_list)
    index_list.remove(random_item)
    hit_indexes.append(random_item)

# create a copy and add the first hit index
full_hit_indexes = hit_indexes
full_hit_indexes.append(hit_index)
print(full_hit_indexes)

# store data of the first position
current_hit_indexes = full_hit_indexes
current_distance = distance_sum(current_hit_indexes)
print (current_hit_indexes, current_distance)

# optimisation code to minimise distance by swapping one element in the list at a time
temp_hit_indexes = current_hit_indexes.copy()
for i in range(1, max_cycles):
    remove_index = random.randint(0, len(temp_hit_indexes)-1)
    new_index = random.randint(1, len(df['Number']))
    if temp_hit_indexes[remove_index] != hit_index:
        if new_index not in current_hit_indexes:
            temp_hit_indexes.remove(temp_hit_indexes[remove_index])
            temp_hit_indexes.append(new_index)
            temp_distance = distance_sum(temp_hit_indexes)
            if temp_distance < current_distance:
                current_hit_indexes = temp_hit_indexes.copy()
                current_distance = distance_sum(current_hit_indexes)
                print (current_hit_indexes, current_distance)
        temp_hit_indexes = current_hit_indexes.copy()
print ('Final results: ',current_hit_indexes, current_distance)

final_data = []
final_datum = [current_hit_indexes, current_distance]

```



PEG amine HP5 was synthesised using 1-(9H-fluoren-9-yl)-3-oxo-2,7,10,13,16-pentaoxa-4-azanonadecan-19-oic acid according to the general DNA headpiece procedure.

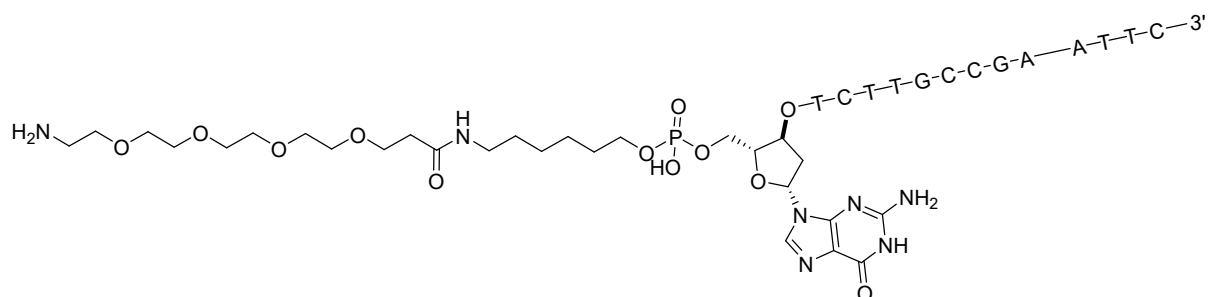

Mass spectrum plot showing counts vs. acquisition time. The main plot has a y-axis labeled  $\times 10^5$  and an x-axis labeled "Counts vs. Acquisition Time (min)". It shows several peaks, with a major one at 3.576 minutes. An inset plot shows a zoomed-in view of the peak at 3.576 minutes, with a y-axis labeled  $\times 10^2$  and an x-axis labeled "Counts (%) vs. Mass-to-Charge (m/z)". The inset shows a peak at m/z 4655.9656. Text on the right indicates "Expected: 4653.9458" and "Observed: 4653.9625".

[illegible]

Expected: 4839.8887  
Observed: 4839.9775\*

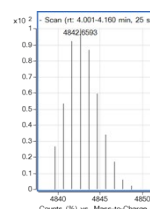

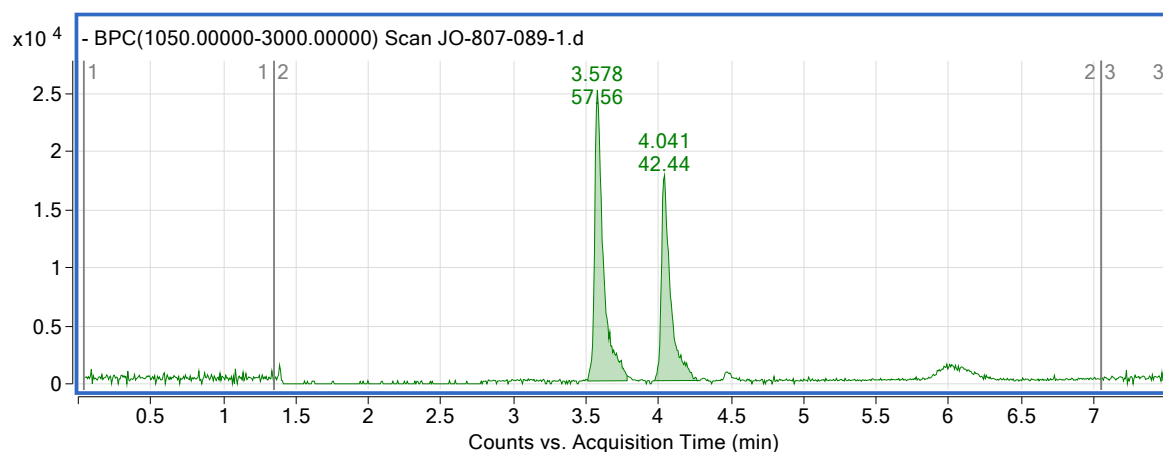

HP2 was synthesised using 12-(((9H-fluoren-9-yl)methoxy)carbonyl)amino)dodecanoic acid according to the general DNA headpiece procedure.

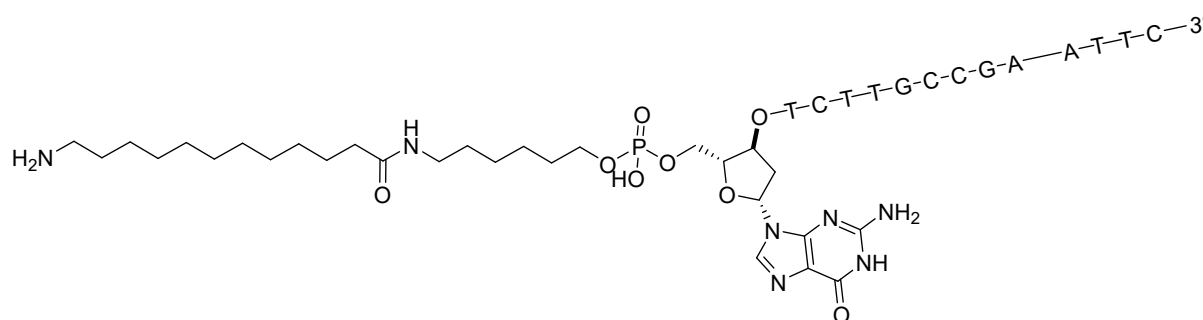

Figure S3: Mass spectrum of double-stranded HP2 analysed by DNA mass spectrometry gradient A.

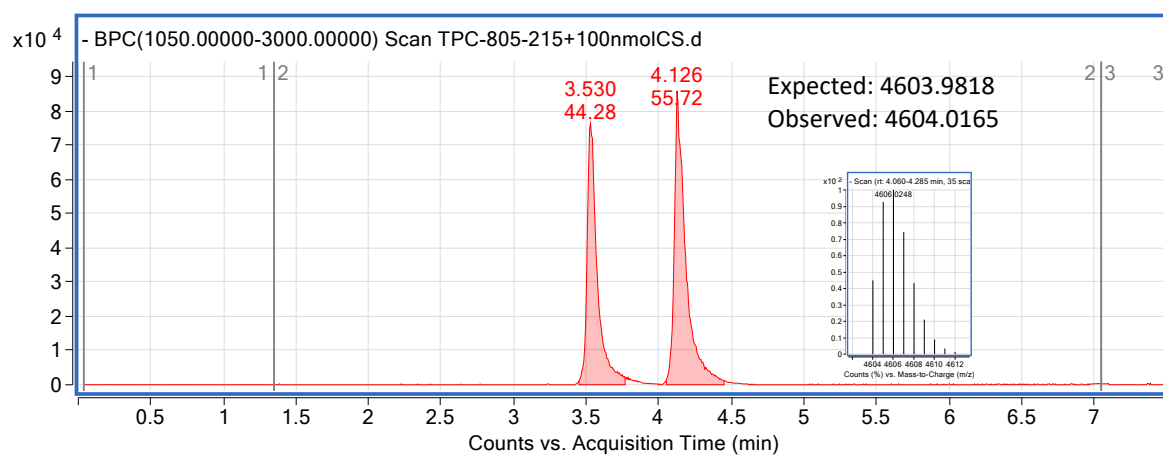

HP3 was synthesised using 16-(*tert*-butoxy)-16-oxohexadecanoic acid according to the general DNA headpiece procedure.

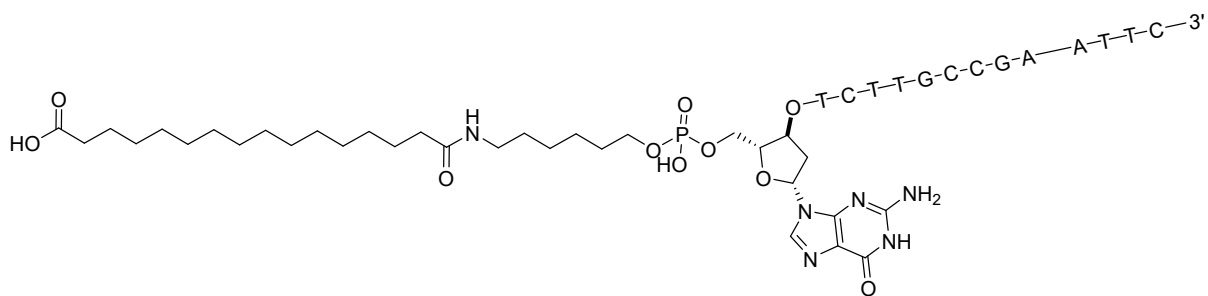

Figure S4: Mass spectrum of double-stranded HP3 analysed by DNA mass spectrometry gradient A.

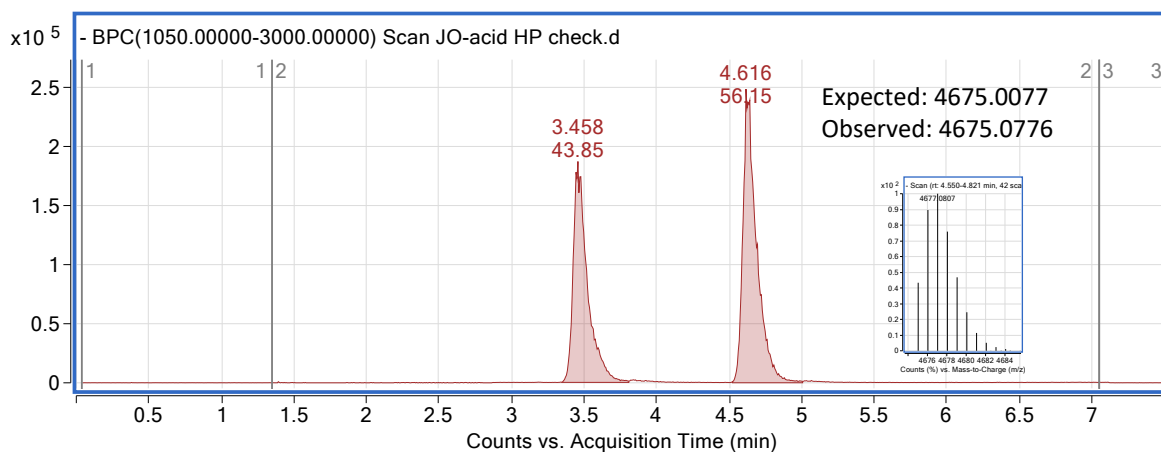

HP4 was synthesised using PEG amine HP (1–50 nmol) and 4-iodobenzoic acid according to the general on-DNA EDC/Sulfo-NHS forward amide coupling procedure.

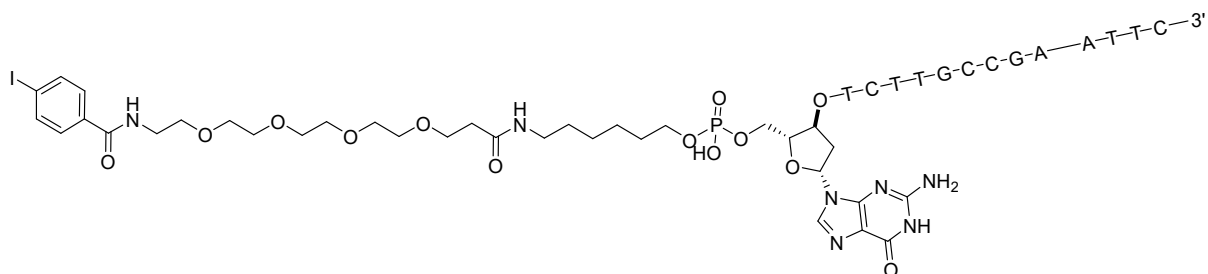

Figure S5: Mass spectrum of HP4 analysed by DNA mass spectrometry gradient A.

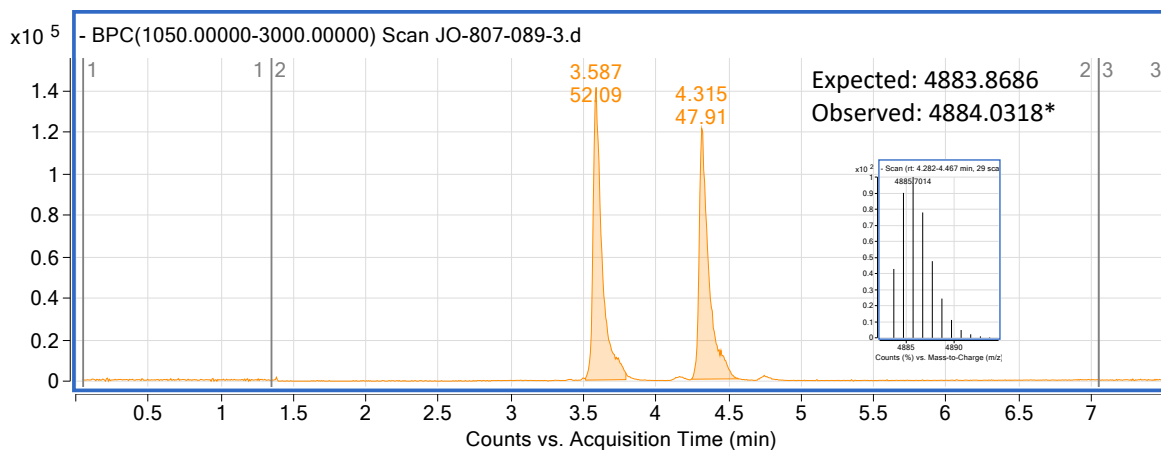

## On-DNA Suzuki-Miyaura Cross-Coupling Reaction

On-DNA Suzuki-Miyaura Cross-Coupling Reaction of DNA-Conjugated Bromopyrazole HP1

Tables 1–2 Chromatograms

Compound 2 was synthesised according to general Suzuki procedure.

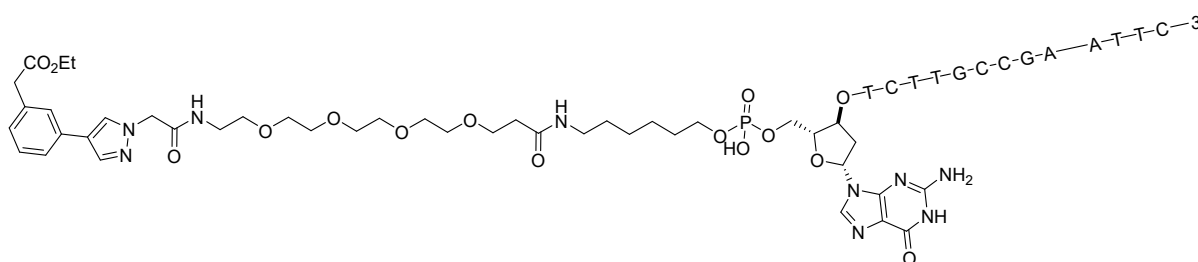

Figure S6: Mass spectrum of product 2 synthesised from HP1 and boronic acid 1 with no surfactant analysed by DNA mass spectrometry gradient A.

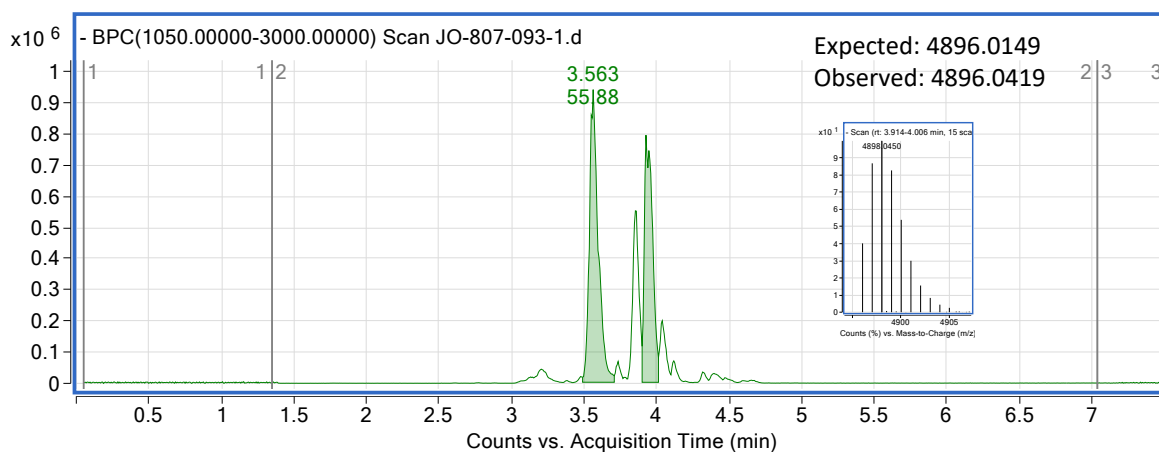

Figure S7: Mass spectrum of product 2 synthesised from HP1 and boronic acid 1 using TPGS-750-M as the surfactant analysed by DNA mass spectrometry gradient A.

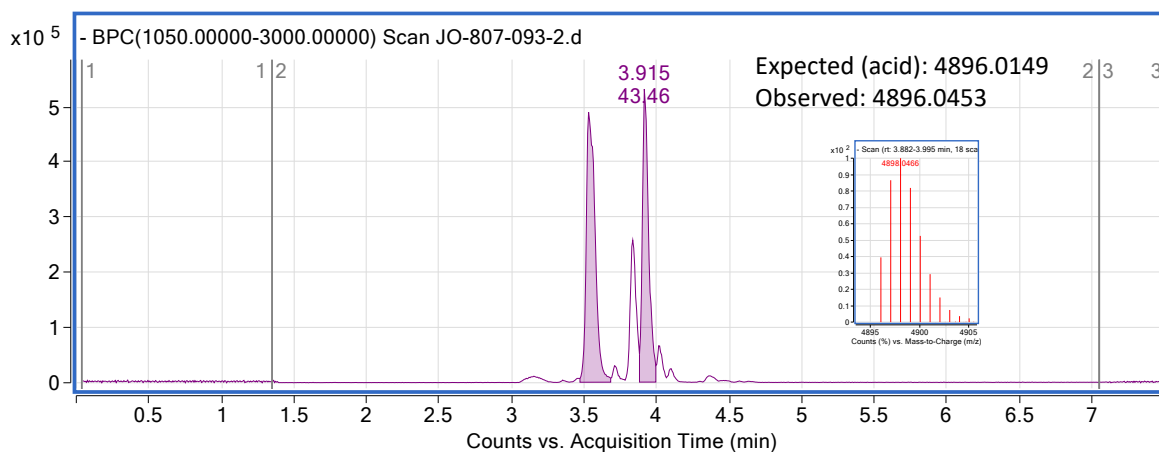

Figure S8: Mass spectrum of product 2 synthesised from HP1 and boronic acid 1 using PEG<sub>5</sub>C<sub>12</sub> as the surfactant analysed by DNA mass spectrometry gradient A.

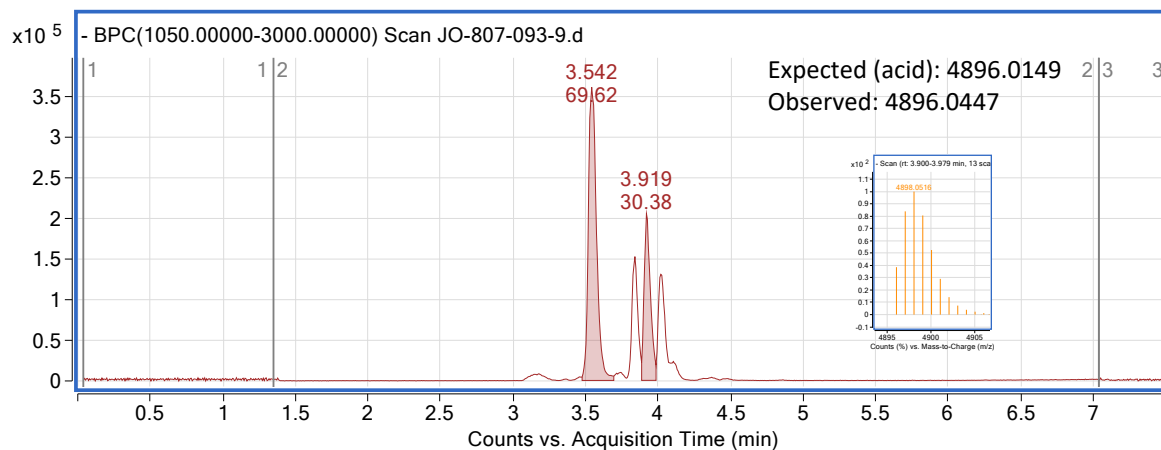

Figure S9: Mass spectrum of product 2 synthesised from HP1 and boronic acid 1 using Tween 65 as the surfactant analysed by DNA mass spectrometry gradient A.

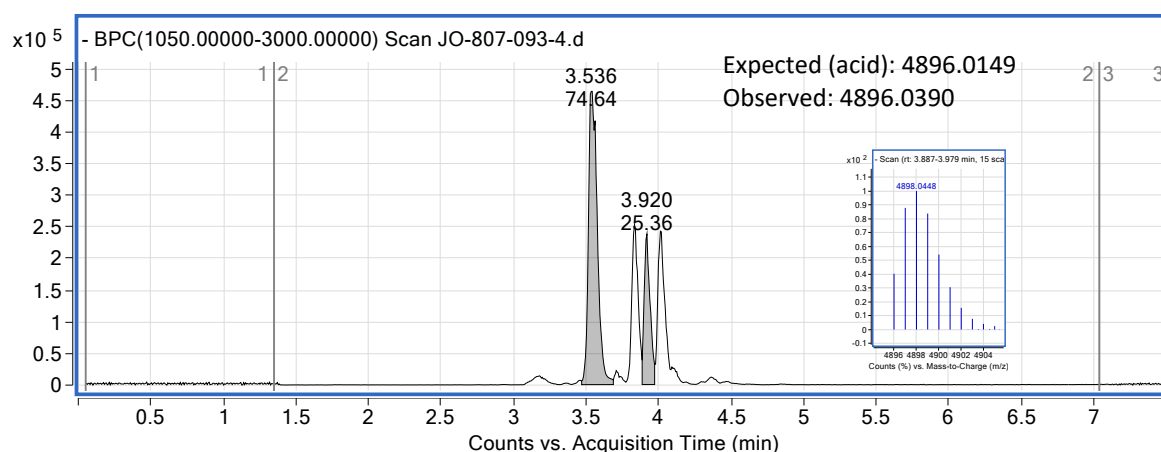

Figure S10: Mass spectrum of product 2 synthesised from HP1 and boronic acid 1 using Brij 700 as the surfactant analysed by DNA mass spectrometry gradient A.

Expected (acid): 4896.0149  
Observed: 4896.0374

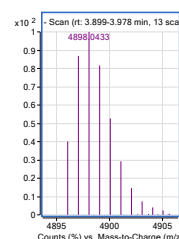

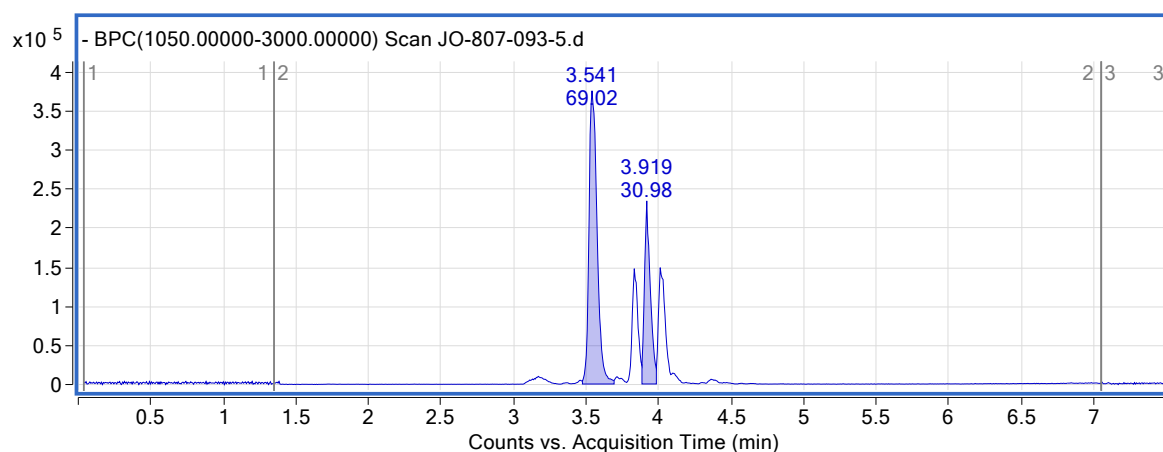

Figure S11: Mass spectrum of product 2 synthesised from HP1 and boronic acid 1 using Brij S20 as the surfactant analysed by DNA mass spectrometry gradient A.

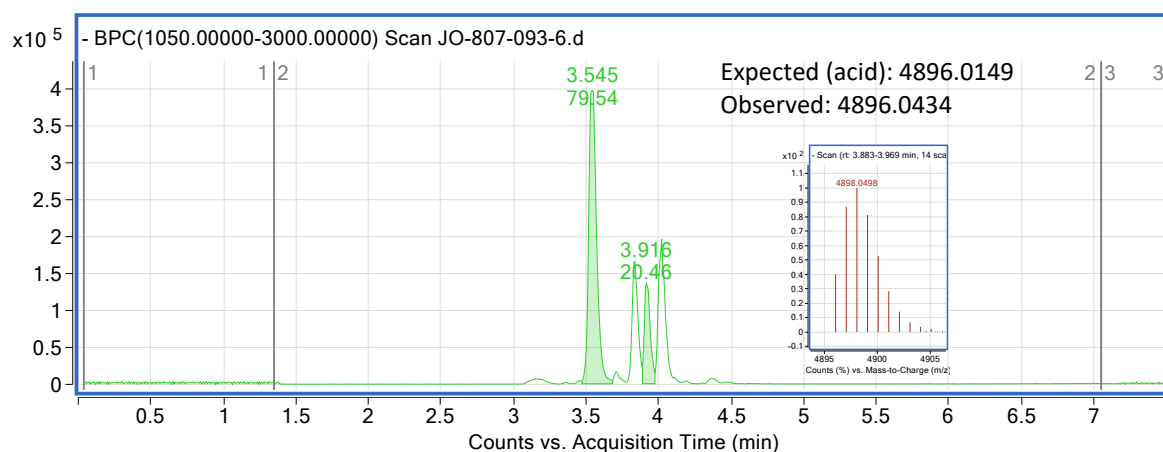

Figure S12: Mass spectrum of product 2 synthesised from HP1 and boronic acid 1 using Triton-X-405 as the surfactant analysed by DNA mass spectrometry gradient A.

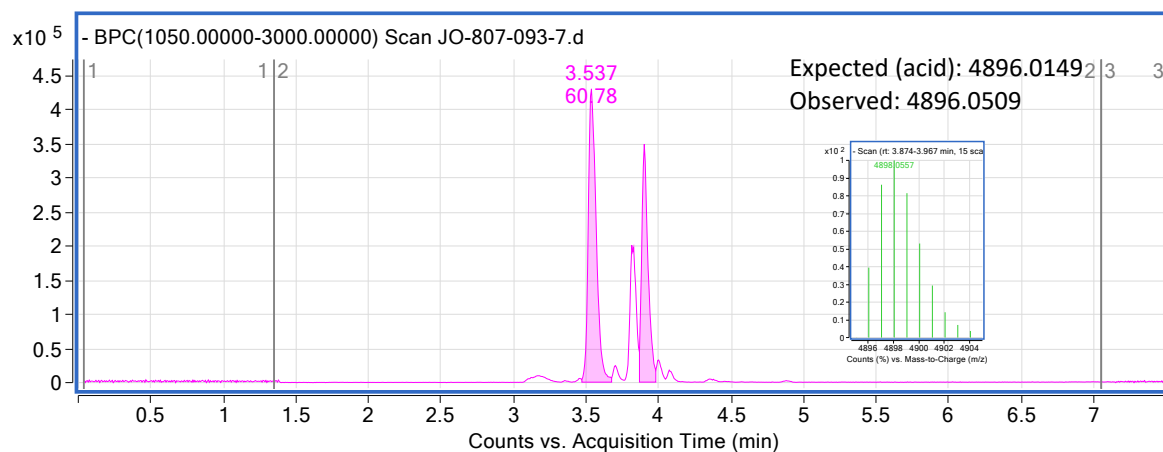

Figure S13: Mass spectrum of product 2 synthesised from HP1 and boronic acid 1 using TTAC as the surfactant analysed by DNA mass spectrometry gradient A.

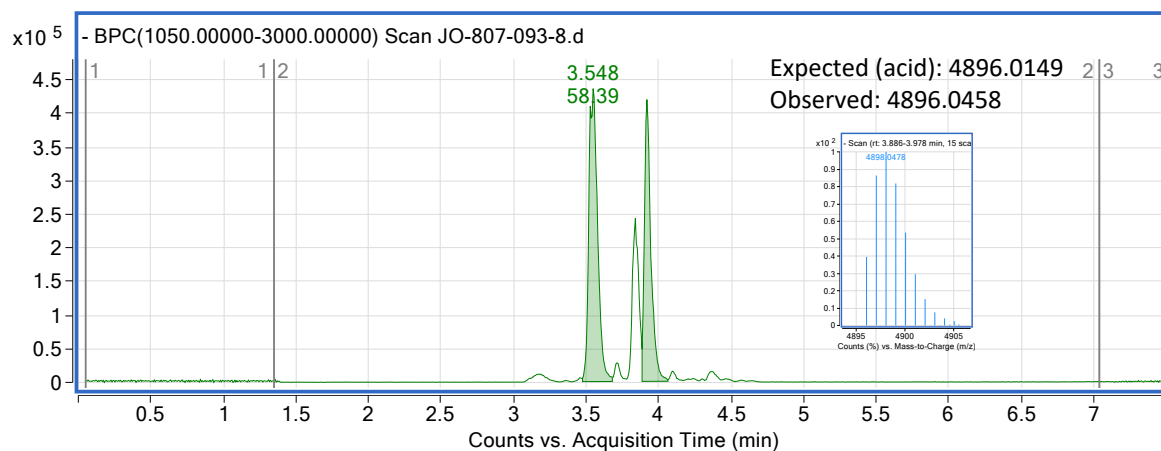

Figure S14: Mass spectrum of product 2 synthesised from HP1 and boronic acid 1 using Sulfobetaine-16 as the surfactant analysed by DNA mass spectrometry gradient A.

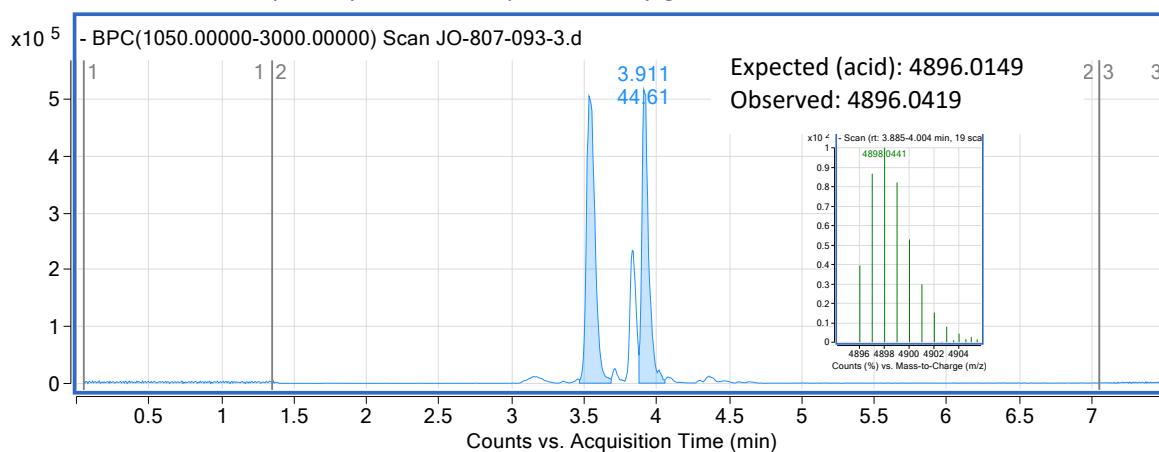

Figure S15: Mass spectrum of product 2 synthesised from HP1 and boronic acid 1 using Polysorbate 60 as the surfactant analysed by DNA mass spectrometry gradient A.

Expected (acid): 4896.0149  
Observed: 4896.0477

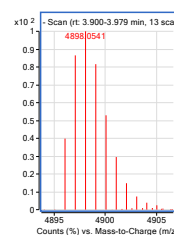

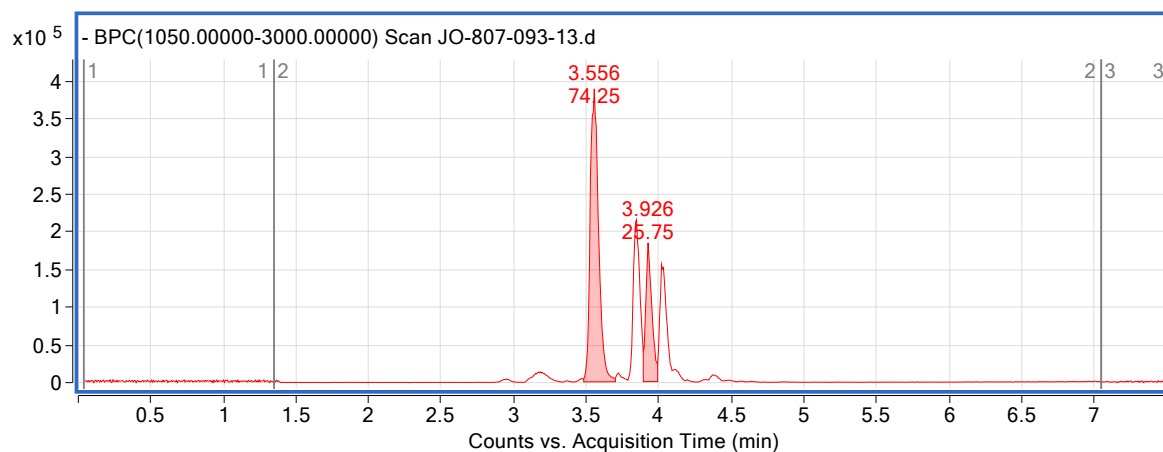

Figure S16: Mass spectrum of product 2 synthesised from HP1 and boronic acid 1 using (Lauryldimethylammonio) acetate as the surfactant analysed by DNA mass spectrometry gradient A.

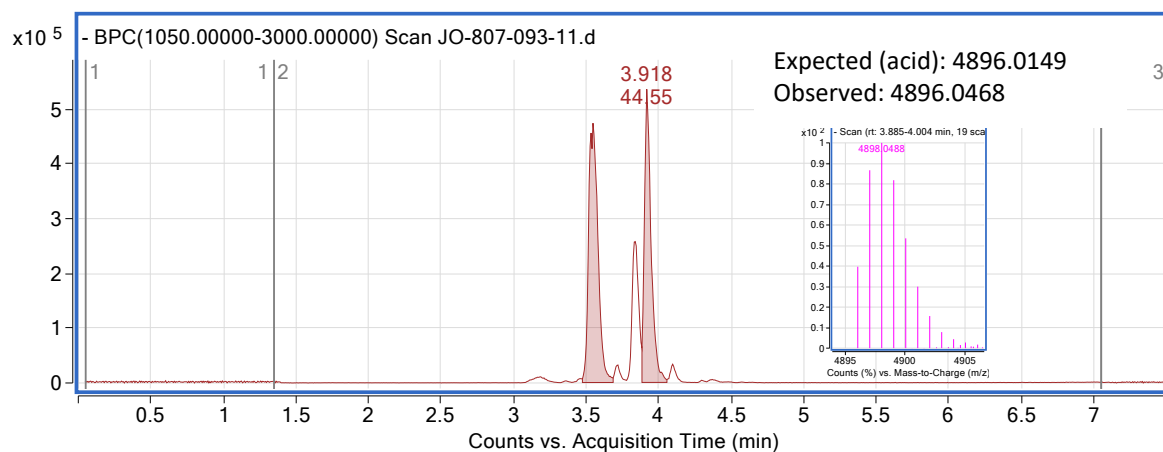

Figure S17: Mass spectrum of product 2 synthesised from HP1 and boronic acid 1 using DAPS as the surfactant analysed by DNA mass spectrometry gradient A.

Expected (acid): 4896.0149  
Observed: 4896.0759

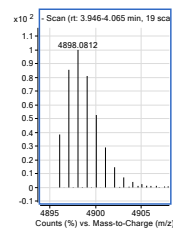



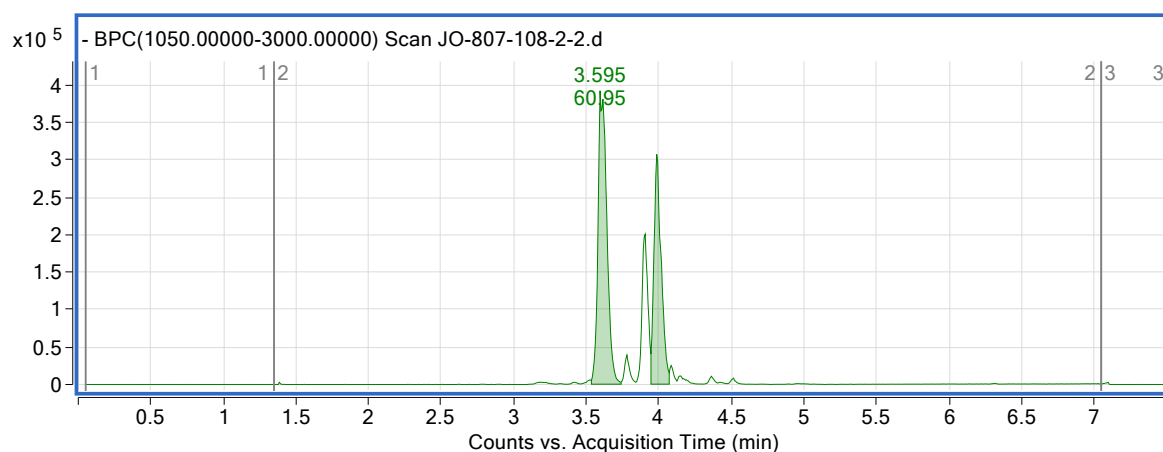

Figure S18: Mass spectrum of product 2 synthesised from HP1 and boronic acid 1 using 4-dodecylbenzenesulfonic acid as the surfactant analysed by DNA mass spectrometry gradient A.

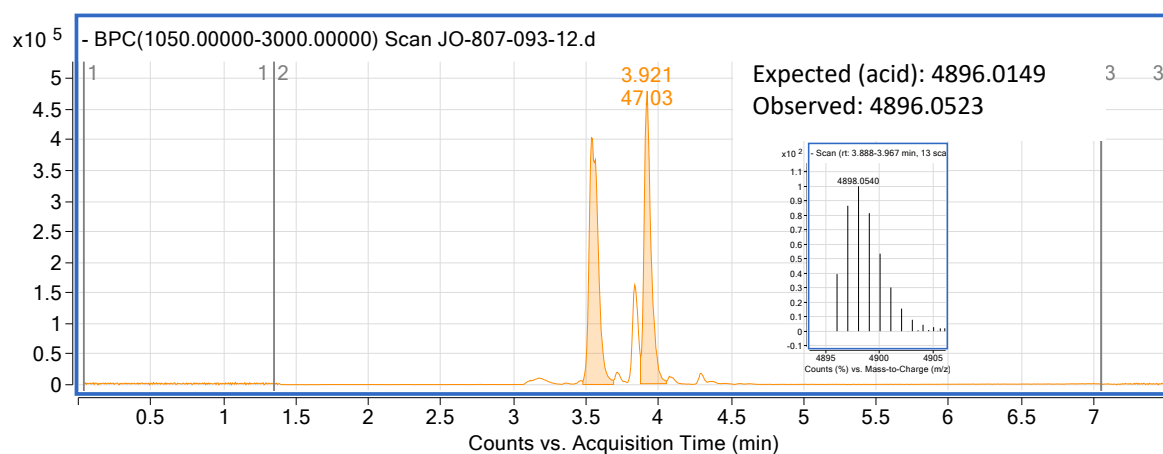

## On-DNA Suzuki-Miyaura Cross-Coupling Reactions of DNA-Conjugated Iodo HP4

Table 3 Chromatograms

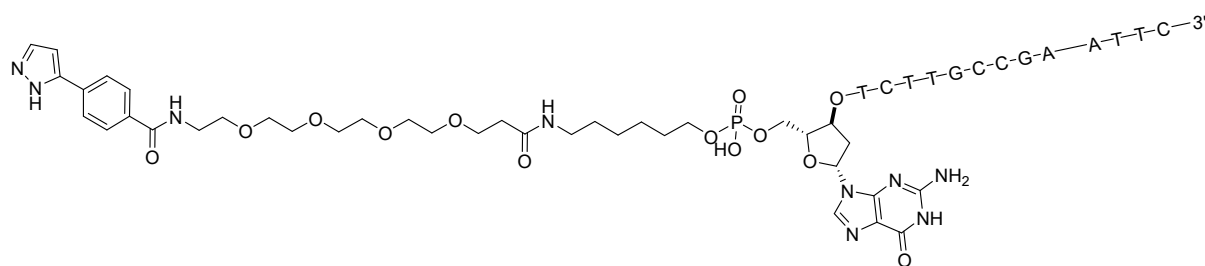

Figure S19: Mass spectrum of DNA-tagged product of Suzuki-Miyaura cross-coupling of HP4 and 5-(4,4,5,5-tetramethyl-1,3,2-dioxaborolan-2-yl)-1H-pyrazole using TPGS-750-M as the surfactant analysed by DNA mass spectrometry gradient A.

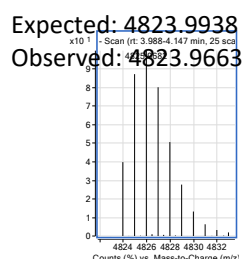

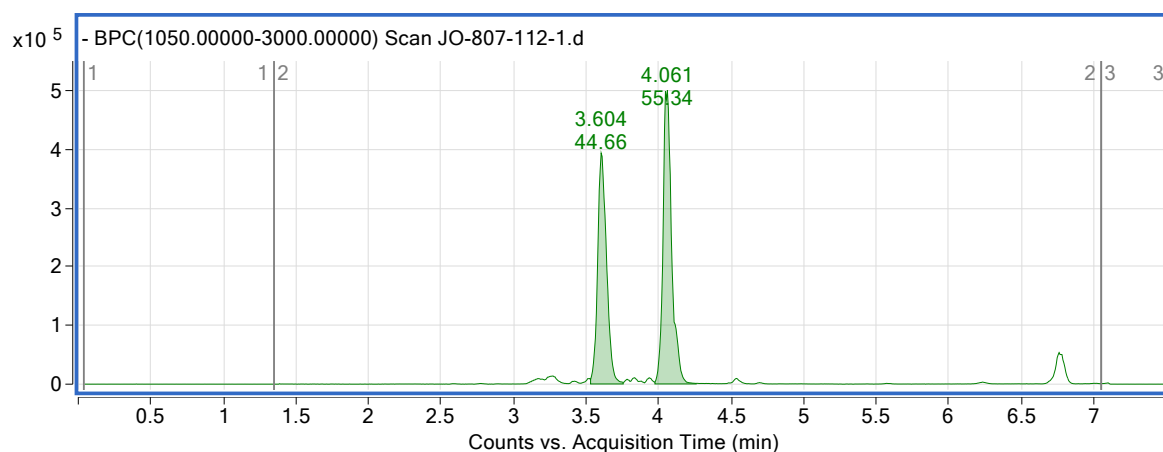

Figure S20: Mass spectrum of DNA-tagged product of Suzuki-Miyaura cross-coupling of HP4 and 5-(4,4,5,5-tetramethyl-1,3,2-dioxaborolan-2-yl)-1H-pyrazole using (lauryldimethylammonio)acetate as the surfactant analysed by DNA mass spectrometry gradient A.

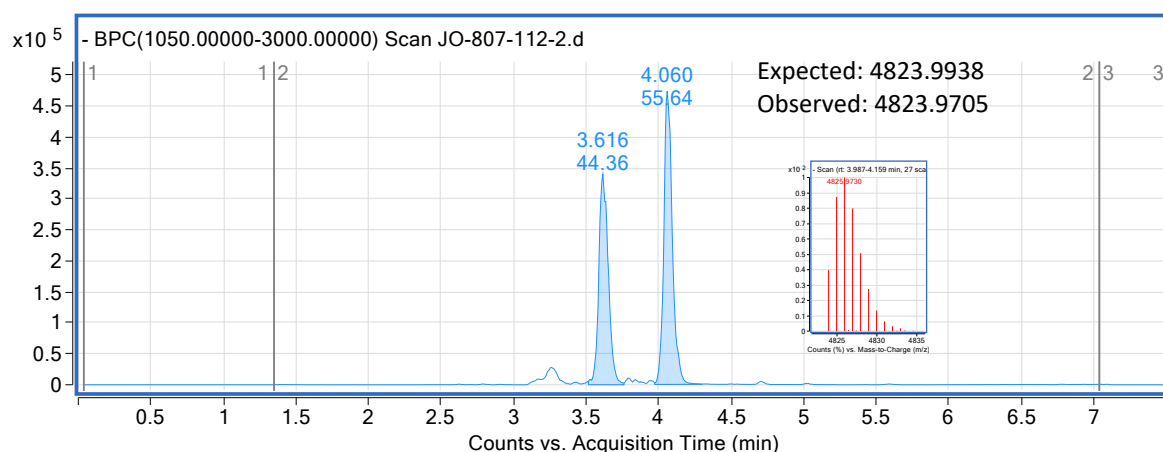

Figure S21: Mass spectrum of DNA-tagged product of Suzuki-Miyaura cross-coupling of HP4 and 5-(4,4,5,5-tetramethyl-1,3,2-dioxaborolan-2-yl)-1H-pyrazole using 4-dodecylbenzenesulfonic acid as the surfactant analysed by DNA mass spectrometry gradient A.

Expected: 4823.9938  
Observed: 4823.9728

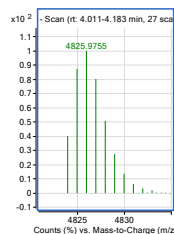

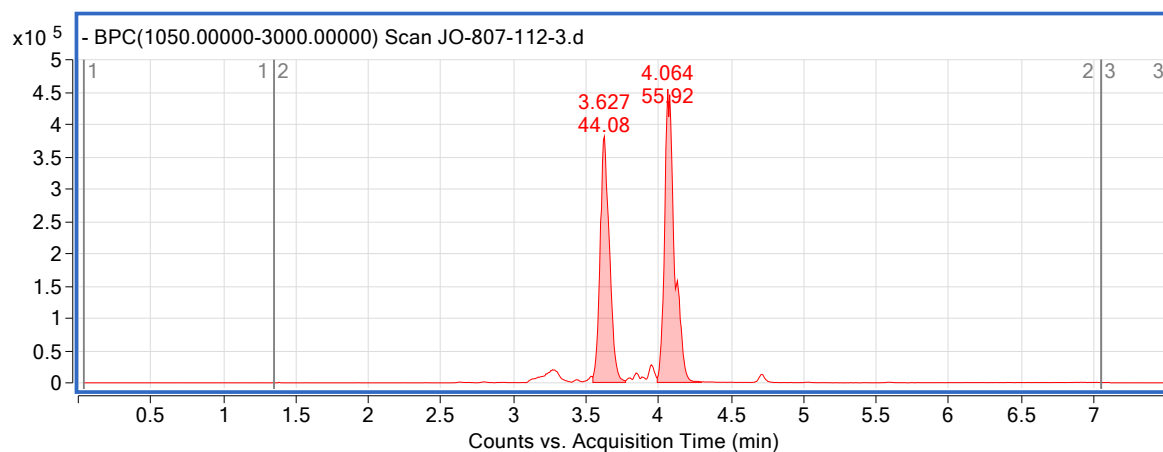

Figure S22: Mass spectrum of DNA-tagged product of Suzuki-Miyaura cross-coupling of HP4 and 5-(4,4,5,5-tetramethyl-1,3,2-dioxaborolan-2-yl)-1H-pyrazole using sulfobetaine-16 as the surfactant analysed by DNA mass spectrometry gradient A.

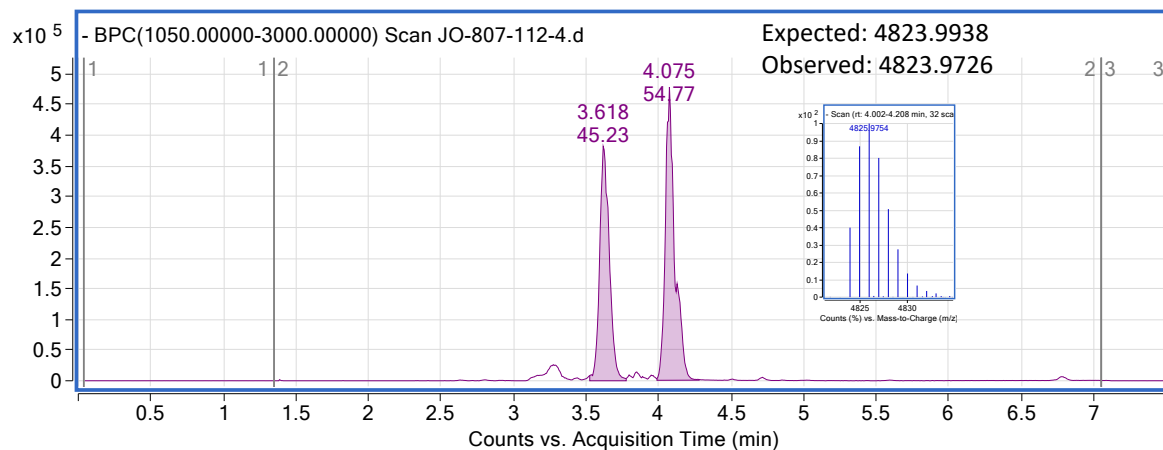

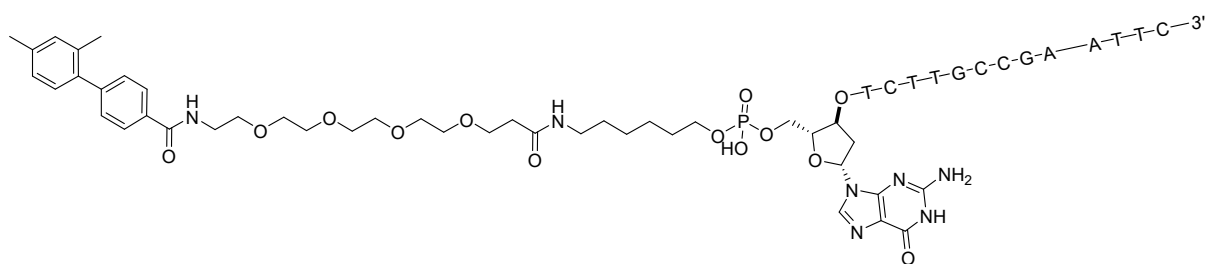

Figure S23: Mass spectrum of DNA-tagged product of Suzuki-Miyaura cross-coupling of HP4 and (2,4-dimethylphenyl)boronic acid using TPGS-750-M as the surfactant analysed by DNA mass spectrometry gradient A.

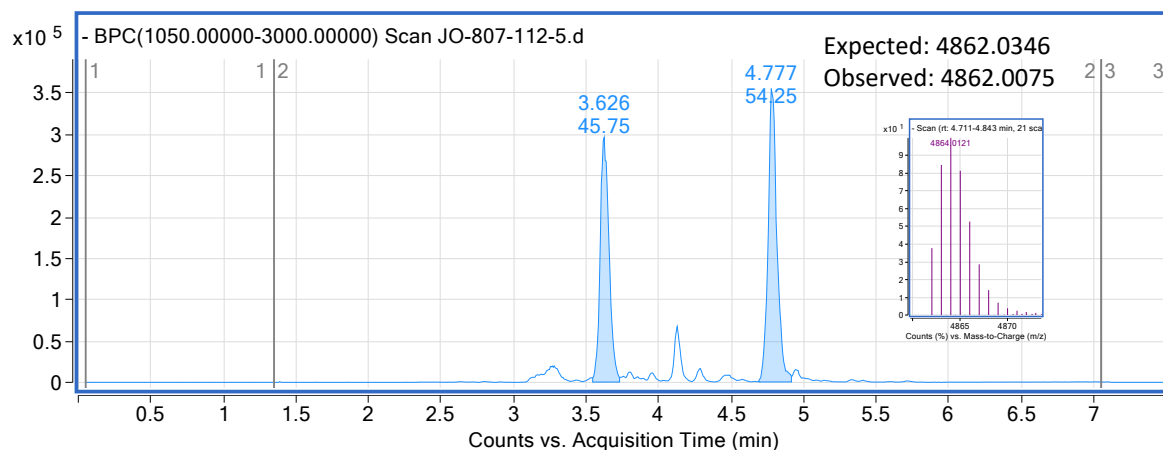

Figure S24: Mass spectrum of DNA-tagged product of Suzuki-Miyaura cross-coupling of HP4 and (2,4-dimethylphenyl)boronic acid using (lauryldimethylammonio)acetate as the surfactant analysed by DNA mass spectrometry gradient A.

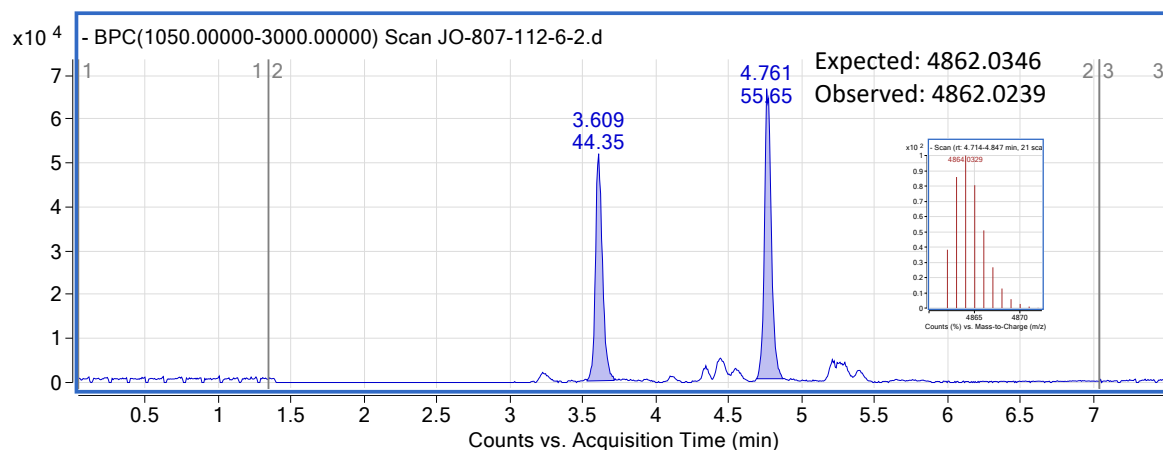

Figure S25: Mass spectrum of DNA-tagged product of Suzuki-Miyaura cross-coupling of HP4 and (2,4-dimethylphenyl)boronic acid using 4-dodecylbenzenesulfonic acid as the surfactant analysed by DNA mass spectrometry gradient A.

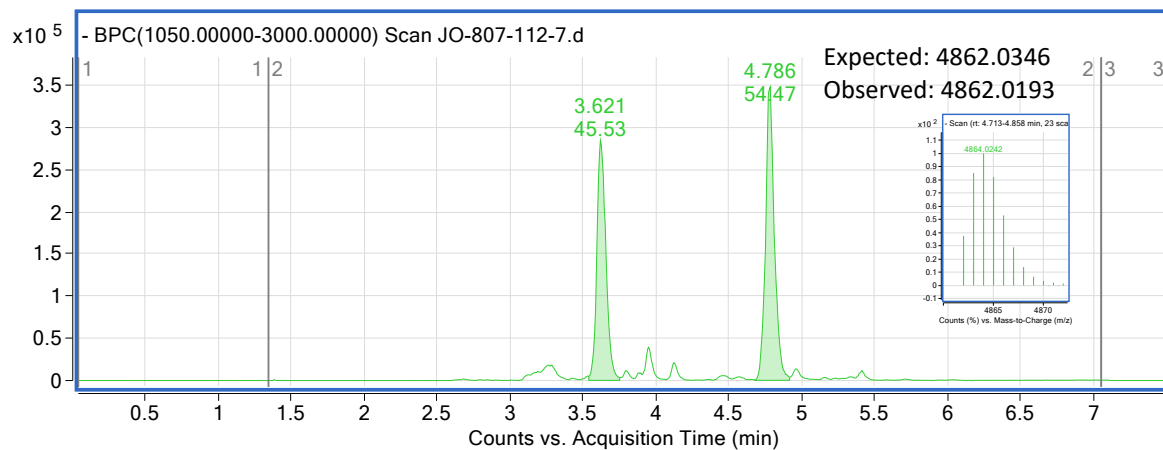

Figure S26: Mass spectrum of DNA-tagged product of Suzuki-Miyaura cross-coupling of HP4 and (2,4-dimethylphenyl)boronic acid using sulfobetaine-16 as the surfactant analysed by DNA mass spectrometry gradient A.

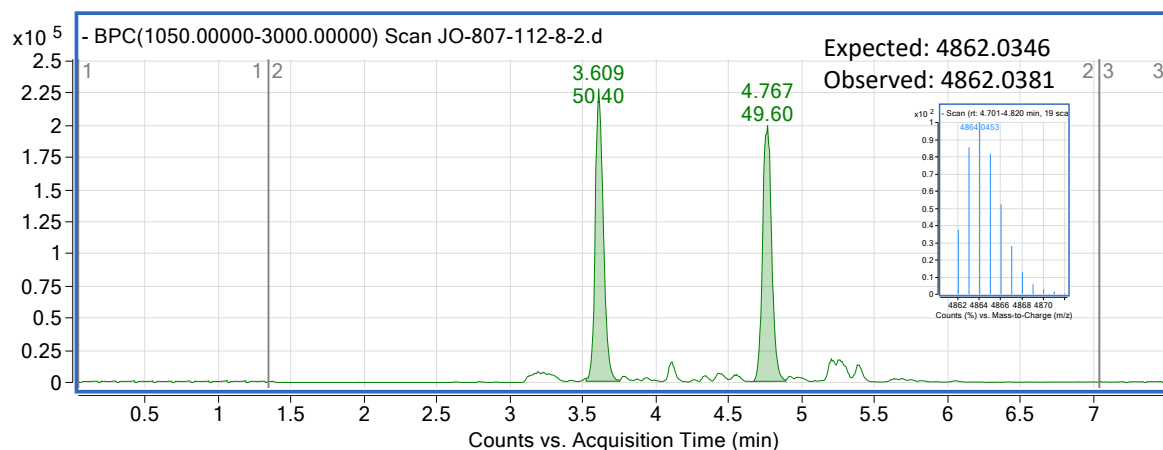

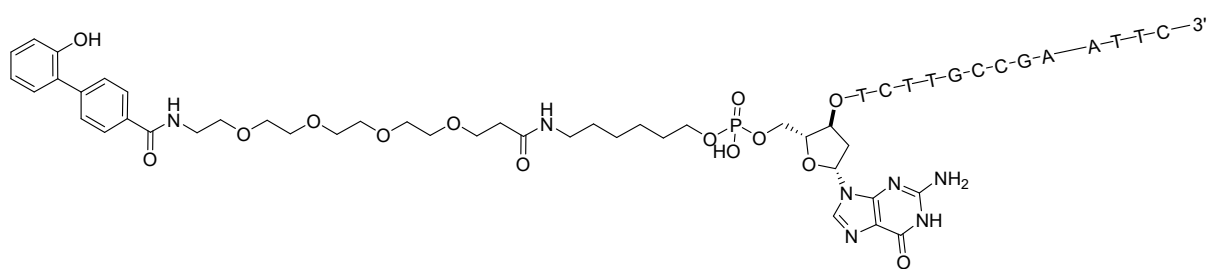

Figure S27: Mass spectrum of DNA-tagged product of Suzuki-Miyaura cross-coupling of HP4 and (2-hydroxyphenyl)boronic acid using TPGS-750-M as the surfactant analysed by DNA mass spectrometry gradient A.

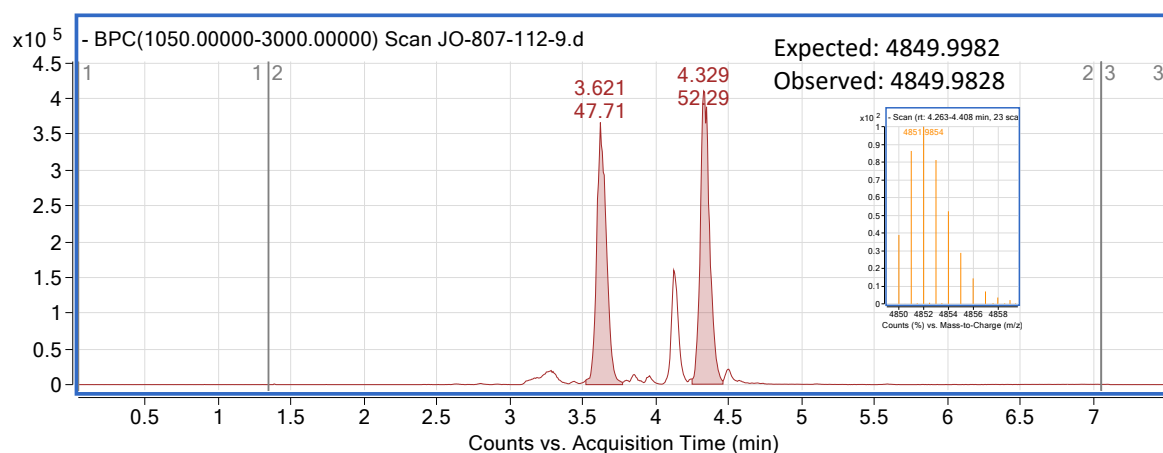

Figure S28: Mass spectrum of DNA-tagged product of Suzuki-Miyaura cross-coupling of HP4 and (2-hydroxyphenyl)boronic acid using (lauryldimethylammonio)acetate as the surfactant analysed by DNA mass spectrometry gradient A.

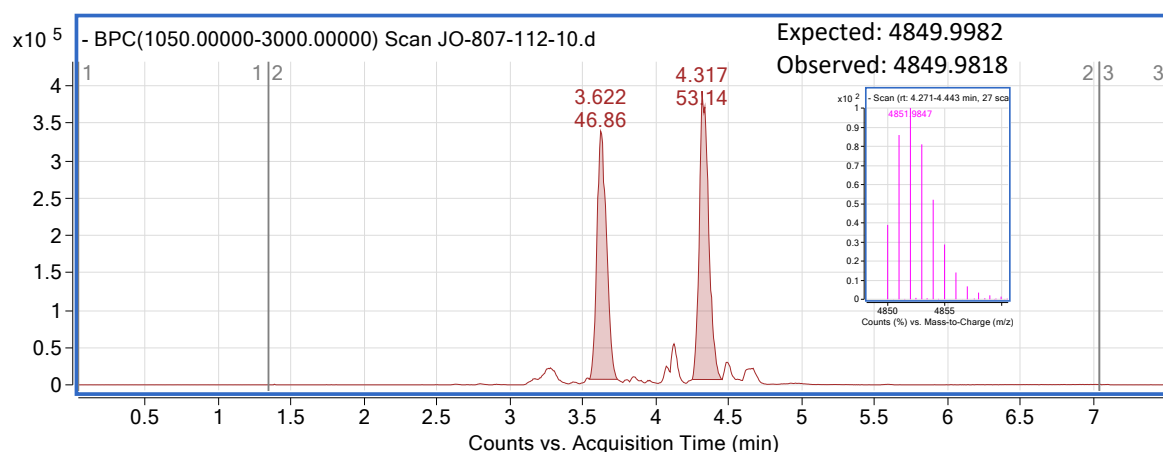

Figure S29: Mass spectrum of DNA-tagged product of Suzuki-Miyaura cross-coupling of HP4 and (2-hydroxyphenyl)boronic acid using 4-dodecylbenzenesulfonic acid as the surfactant analysed by DNA mass spectrometry gradient A.

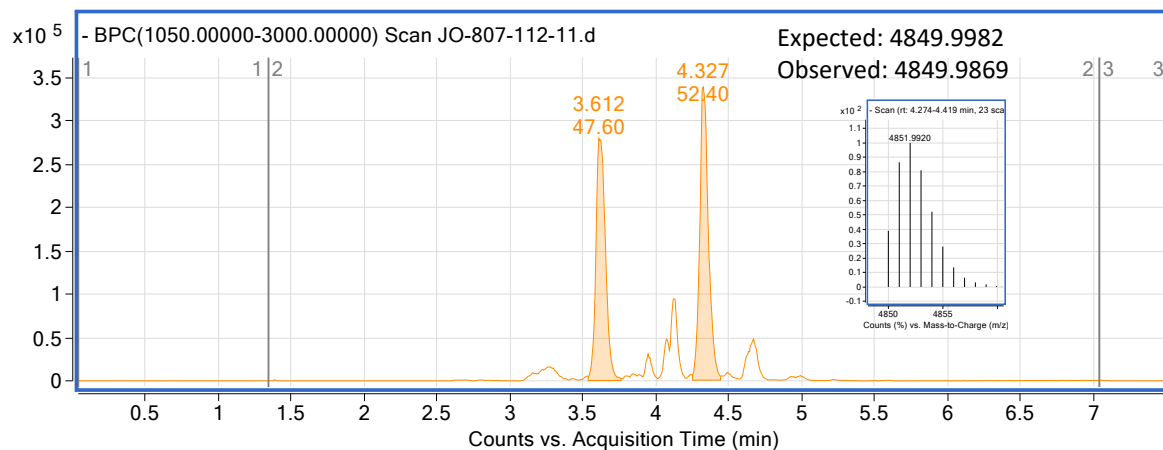

Figure S30: Mass spectrum of DNA-tagged product of Suzuki-Miyaura cross-coupling of HP4 and (2-hydroxyphenyl)boronic acid using sulfobetaine-16 as the surfactant analysed by DNA mass spectrometry gradient A.

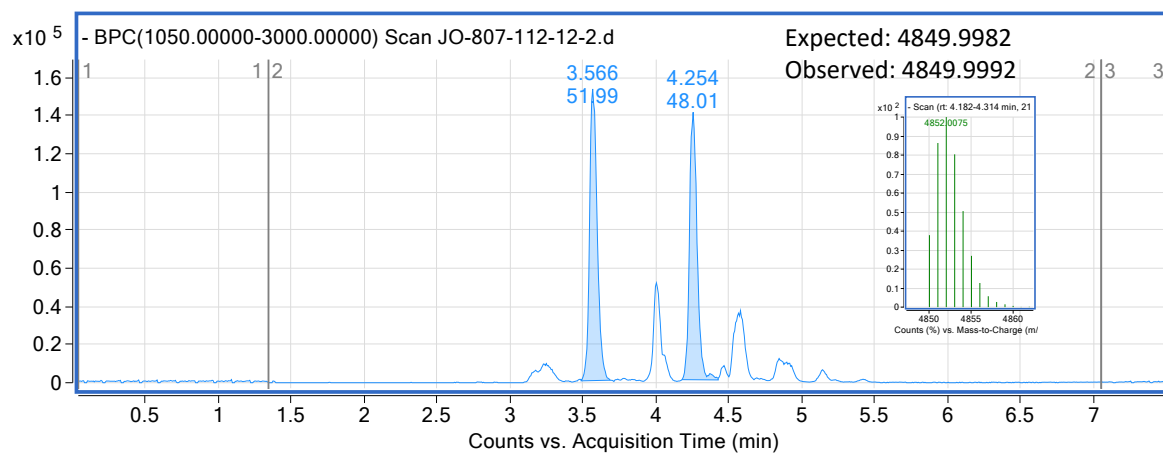

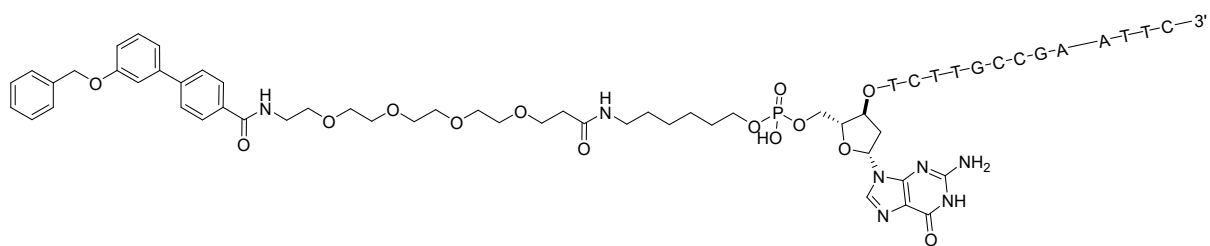

Figure S31: Mass spectrum of DNA-tagged product of Suzuki-Miyaura cross-coupling of HP4 and (3-(benzyloxy)phenyl)boronic acid using TPGS-750-M as the surfactant analysed by DNA mass spectrometry gradient A.

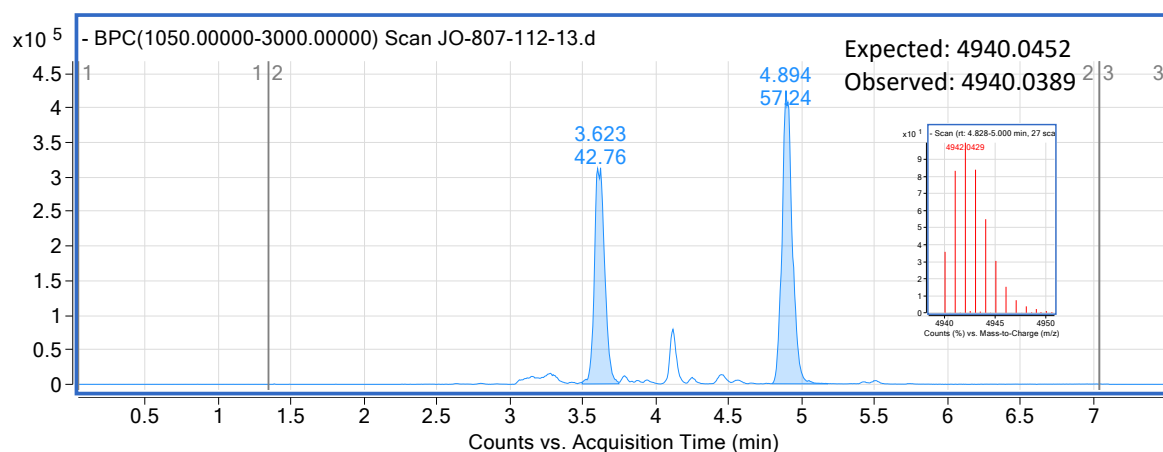

Figure S32: Mass spectrum of DNA-tagged product of Suzuki-Miyaura cross-coupling of HP4 and (3-(benzyloxy)phenyl)boronic acid using (lauryldimethylammonio)acetate as the surfactant analysed by DNA mass spectrometry gradient A.

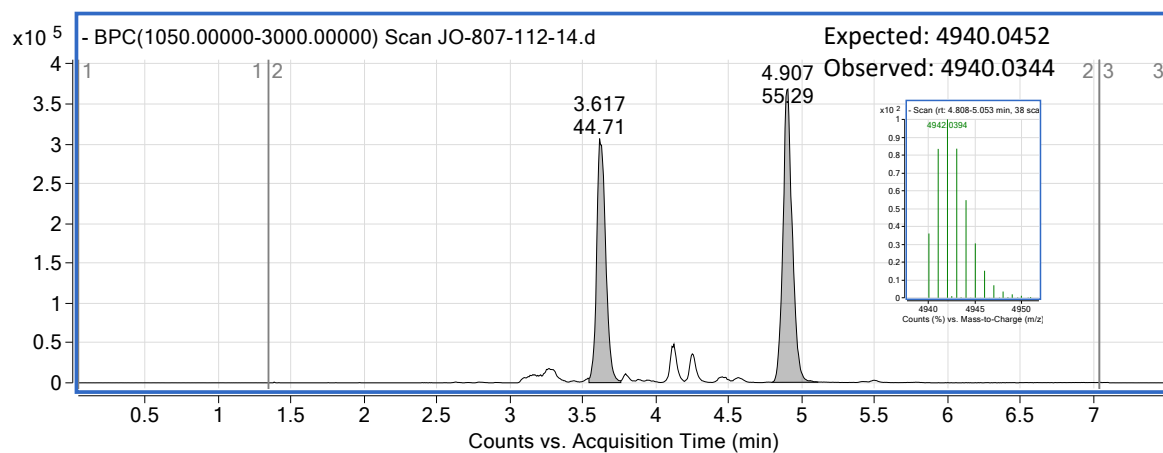



Figure S33: Mass spectrum of DNA-tagged product of Suzuki-Miyaura cross-coupling of HP4 and (3-(benzyloxy)phenyl)boronic acid using 4-dodecylbenzenesulfonic acid as the surfactant analysed by DNA mass spectrometry gradient A.

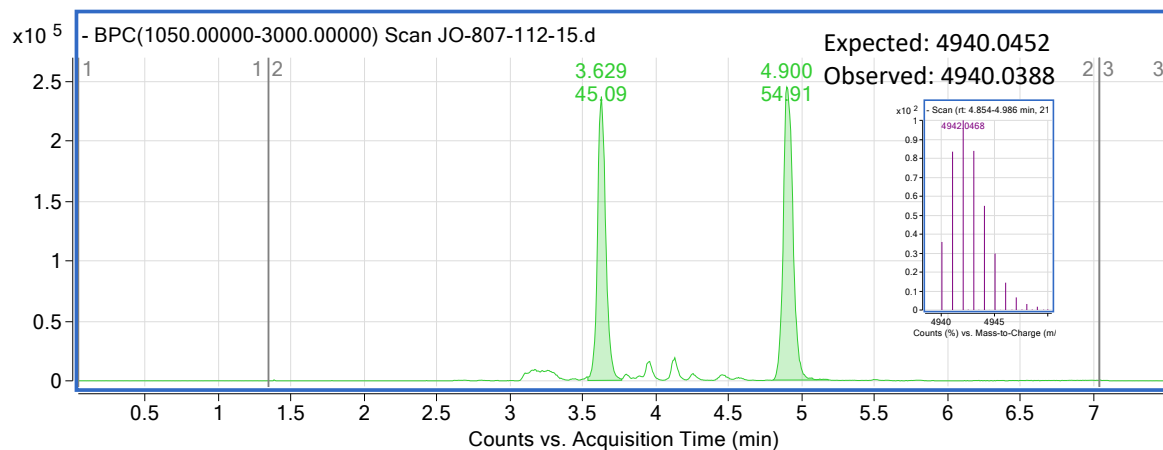

Figure S34: Mass spectrum of DNA-tagged product of Suzuki-Miyaura cross-coupling of HP4 and (3-(benzyloxy)phenyl)boronic acid using sulfobetaine-16 as the surfactant analysed by DNA mass spectrometry gradient A.

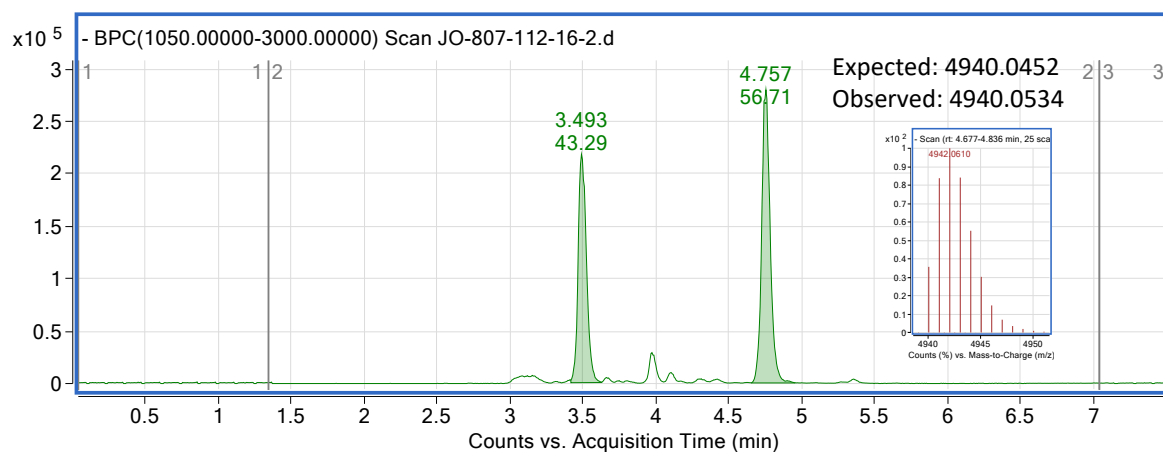

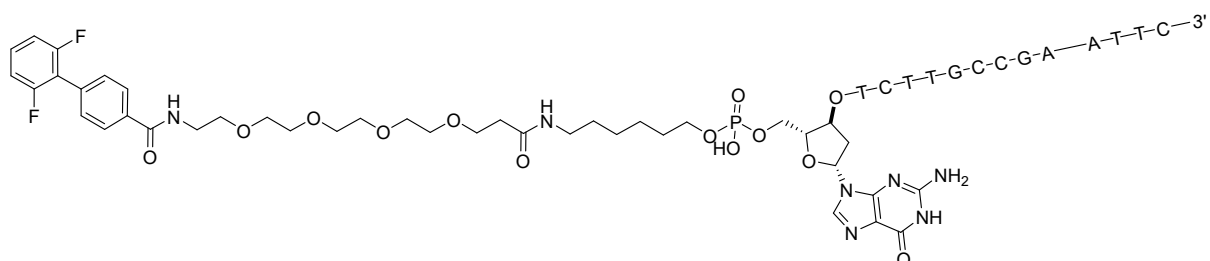

Figure S35: Mass spectrum of DNA-tagged product of Suzuki-Miyaura cross-coupling of HP4 and (2,6-difluorophenyl)boronic acid using TPGS-750-M as the surfactant analysed by DNA mass spectrometry gradient A.

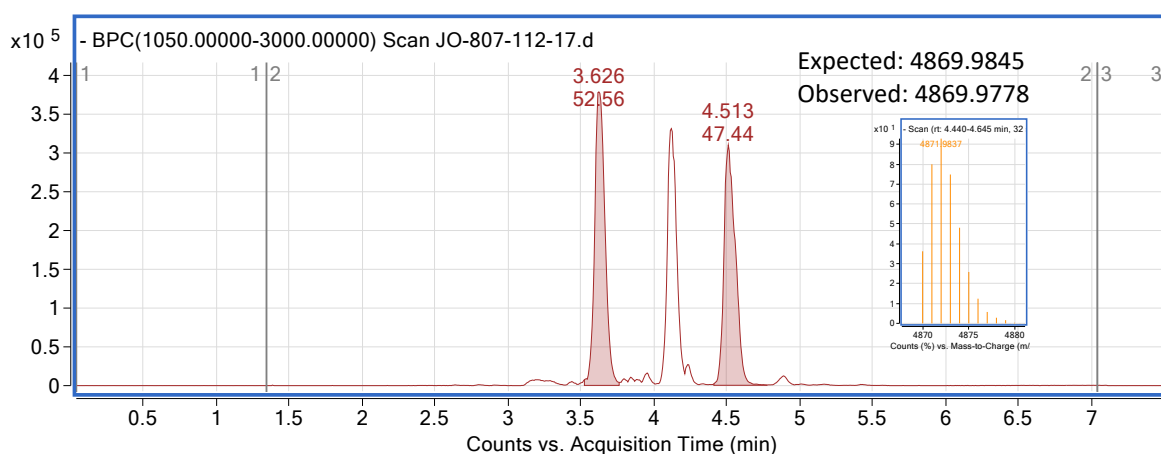

Figure S36: Mass spectrum of DNA-tagged product of Suzuki-Miyaura cross-coupling of HP4 and (2,6-difluorophenyl)boronic acid using (lauryldimethylammonio)acetate as the surfactant analysed by DNA mass spectrometry gradient A.

Expected: 4869.9845

Observed: 4869.9685

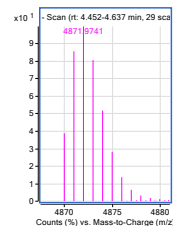

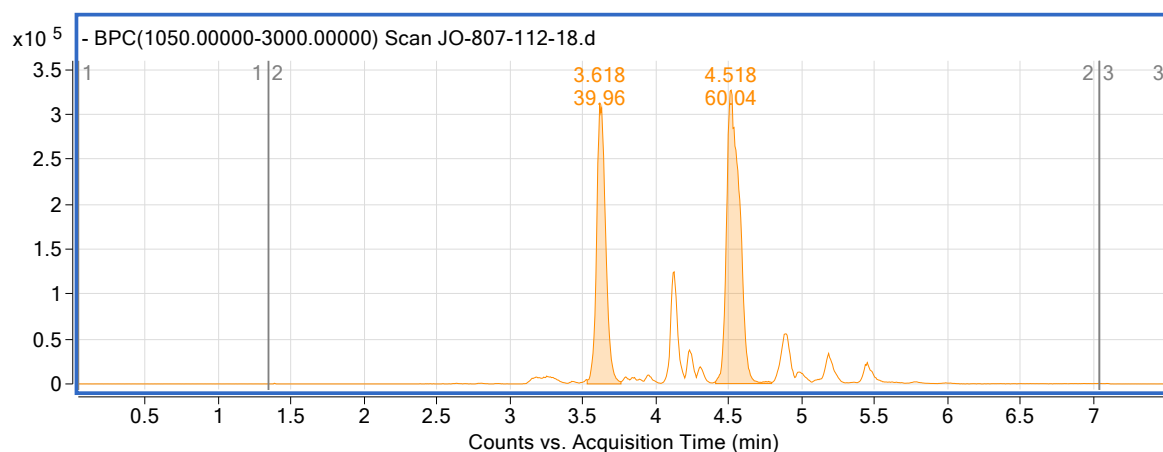

Figure S37: Mass spectrum of DNA-tagged product of Suzuki-Miyaura cross-coupling of HP4 and (2,6-difluorophenyl)boronic acid using 4-dodecylbenzenesulfonic acid as the surfactant analysed by DNA mass spectrometry gradient A.

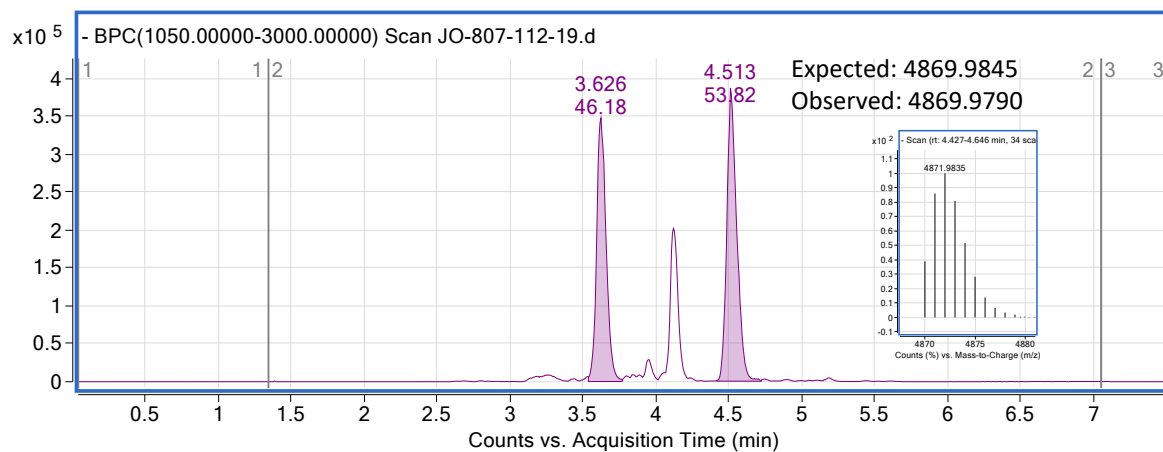

Figure S38: Mass spectrum of DNA-tagged product of Suzuki-Miyaura cross-coupling of HP4 and (2,6-difluorophenyl)boronic acid using sulfobetaine-16 as the surfactant analysed by DNA mass spectrometry gradient A.

Expected: 4869.9845  
Observed: 4869.9912

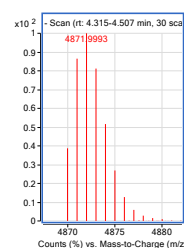

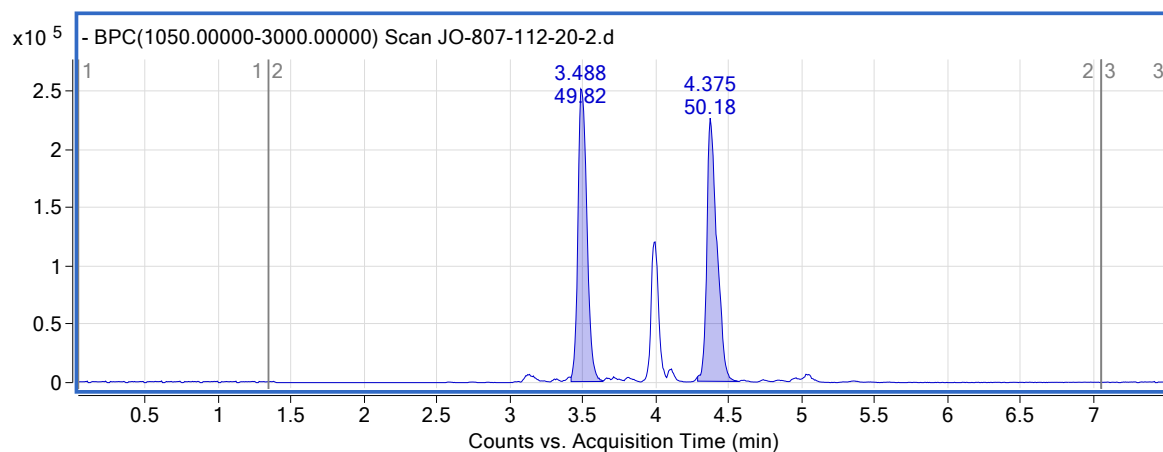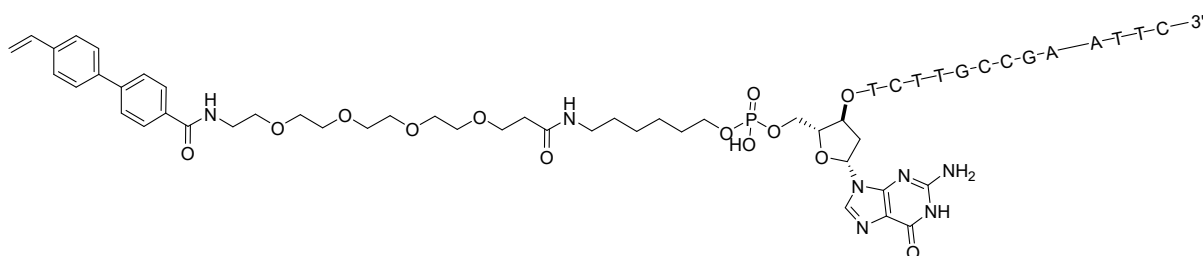

Figure S39: Mass spectrum of DNA-tagged product of Suzuki-Miyaura cross-coupling of HP4 and (4-vinylphenyl)boronic acid using TPGS-750-M as the surfactant analysed by DNA mass spectrometry gradient A.

Expected: 4860.0190  
Observed: 4860.0176

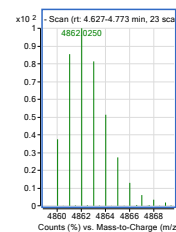

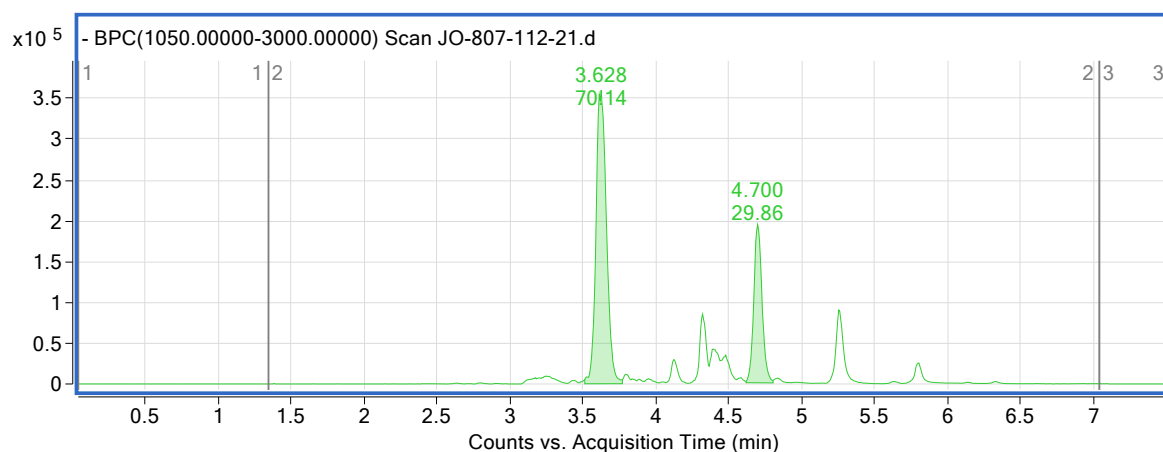

Figure S40: Mass spectrum of DNA-tagged product of Suzuki-Miyaura cross-coupling of HP4 and (4-vinylphenyl)boronic acid using (lauryldimethylammonio)acetate as the surfactant analysed by DNA mass spectrometry gradient A.

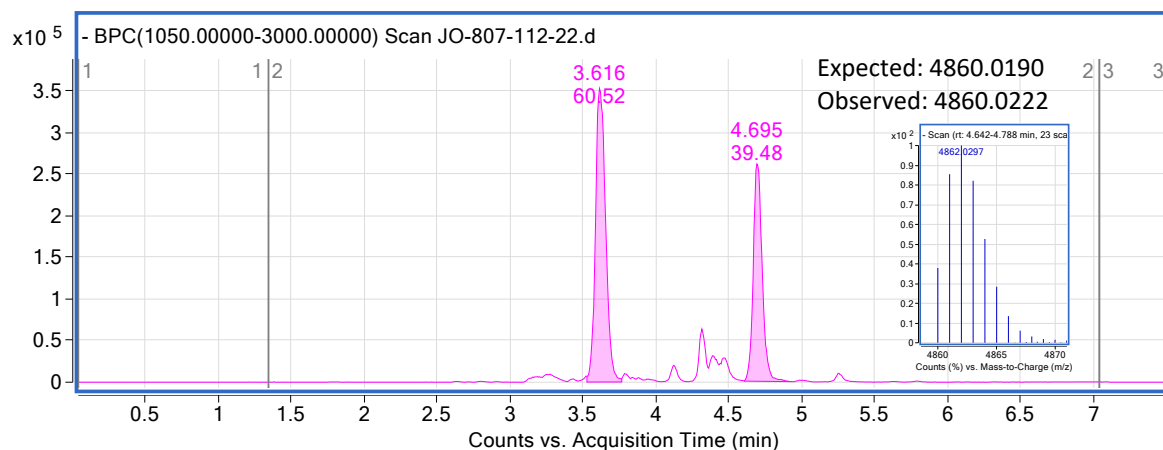

Figure S41: Mass spectrum of DNA-tagged product of Suzuki-Miyaura cross-coupling of HP4 and (4-vinylphenyl)boronic acid using 4-dodecylbenzenesulfonic acid as the surfactant analysed by DNA mass spectrometry gradient A.

Expected: 4860.0190  
Observed: 4860.0351

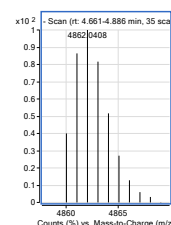

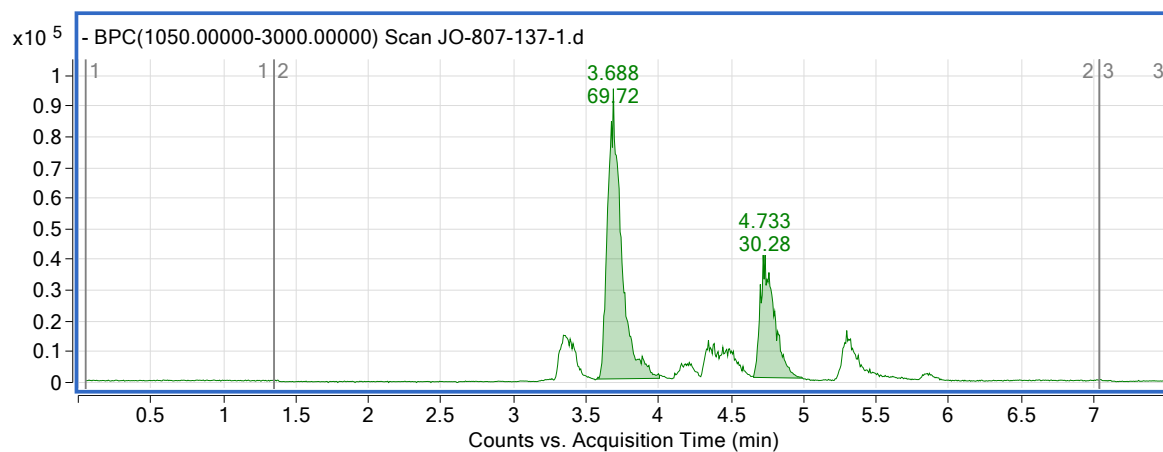

Figure S42: Mass spectrum of DNA-tagged product of Suzuki-Miyaura cross-coupling of HP4 and (4-vinylphenyl)boronic acid using sulfobetaine-16 as the surfactant analysed by DNA mass spectrometry gradient A.

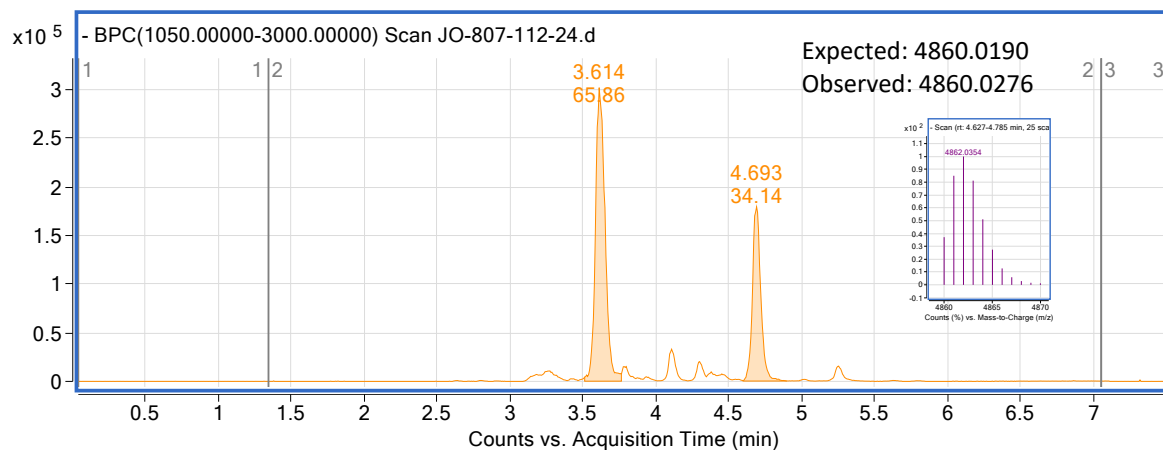

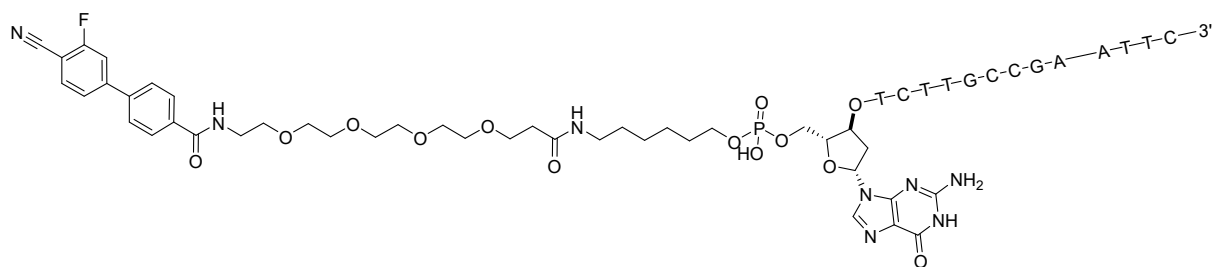

Figure S43: Mass spectrum of DNA-tagged product of Suzuki-Miyaura cross-coupling of HP4 and (4-cyano-3-fluorophenyl)boronic acid using TPGS-750-M as the surfactant analysed by DNA mass spectrometry gradient A.

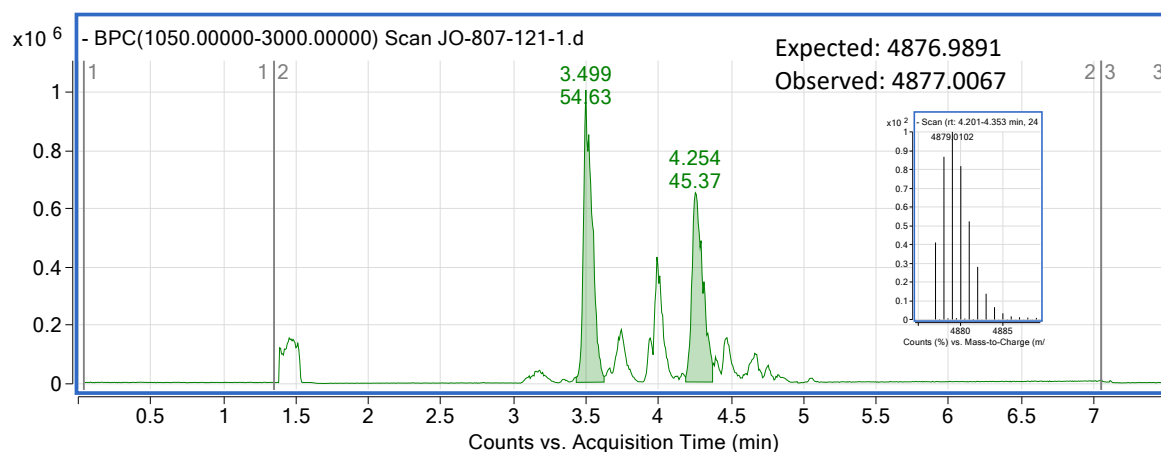

Figure S44: Mass spectrum of DNA-tagged product of Suzuki-Miyaura cross-coupling of HP4 and (4-cyano-3-fluorophenyl)boronic acid using (lauryldimethylammonio)acetate as the surfactant analysed by DNA mass spectrometry gradient A.

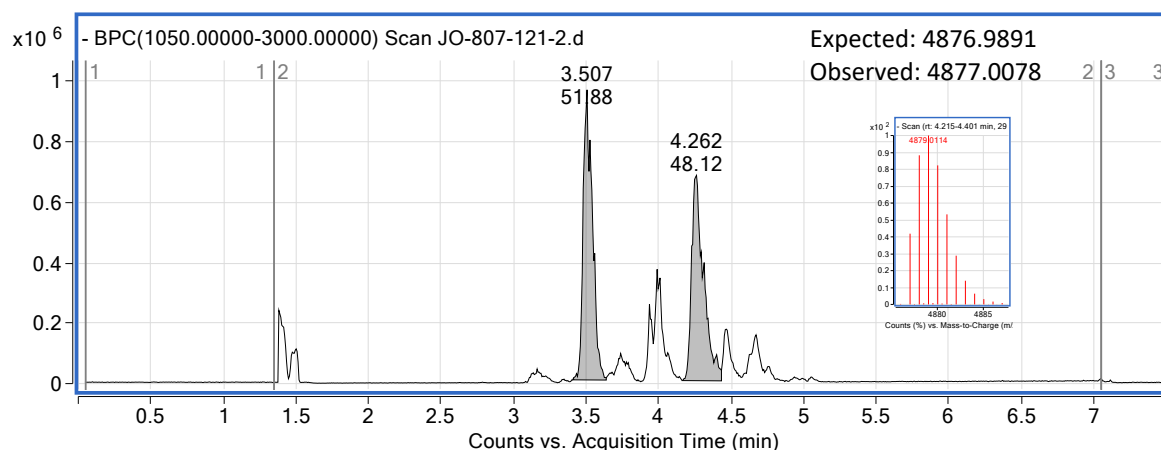

Figure S45: Mass spectrum of DNA-tagged product of Suzuki-Miyaura cross-coupling of HP4 and (4-cyano-3-fluorophenyl)boronic acid using 4-dodecylbenzenesulfonic acid as the surfactant analysed by DNA mass spectrometry gradient A.

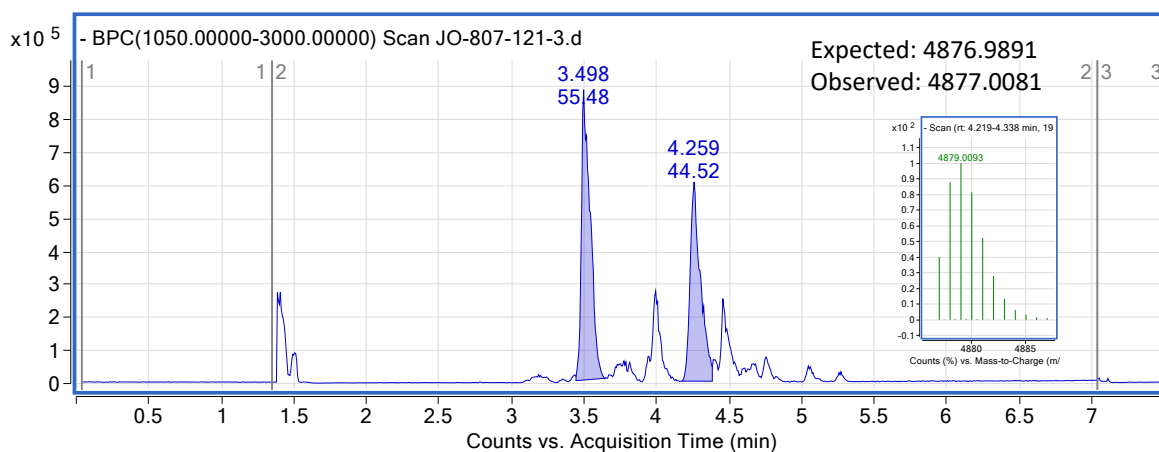

Figure S46: Mass spectrum of DNA-tagged product of Suzuki-Miyaura cross-coupling of HP4 and (4-cyano-3-fluorophenyl)boronic acid using sulfobetaine-16 as the surfactant analysed by DNA mass spectrometry gradient A.

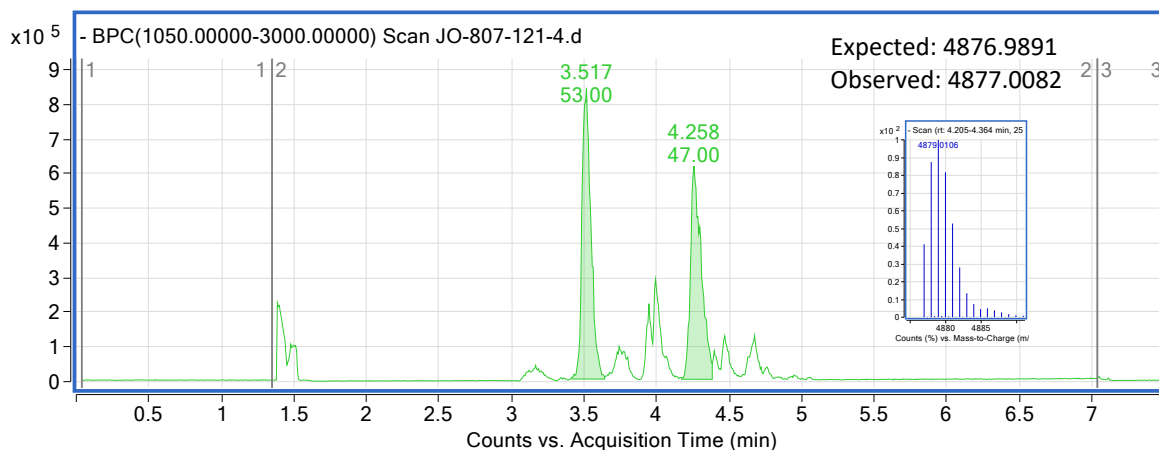



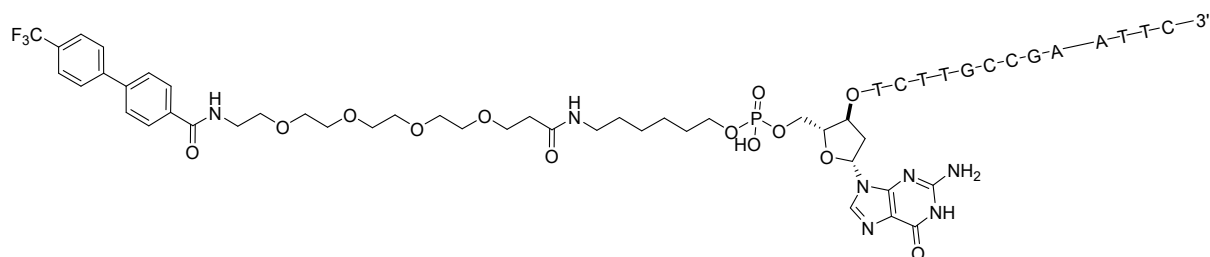

Figure S47: Mass spectrum of DNA-tagged product of Suzuki-Miyaura cross-coupling of HP4 and (4-(trifluoromethyl)phenyl)boronic acid using TPGS-750-M as the surfactant analysed by DNA mass spectrometry gradient A.

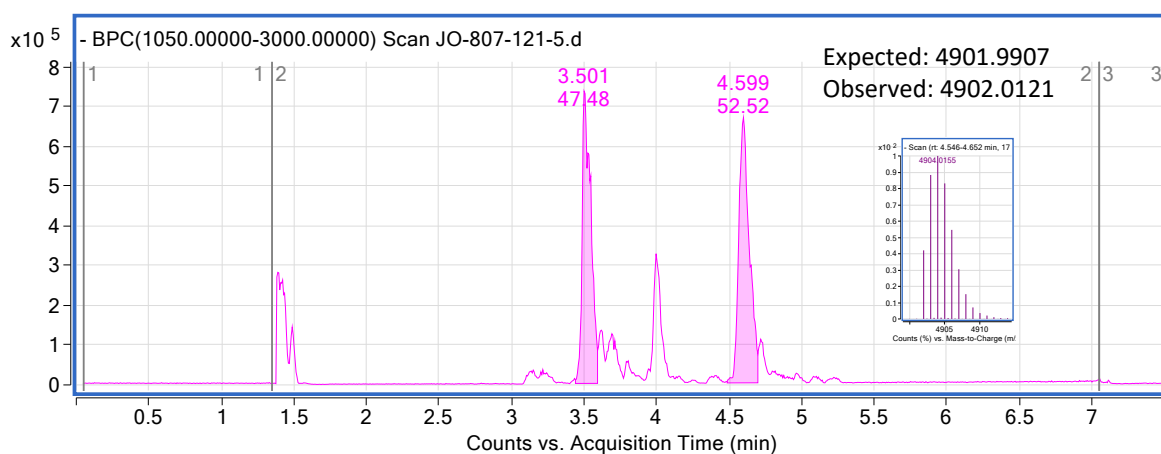

Figure S48: Mass spectrum of DNA-tagged product of Suzuki-Miyaura cross-coupling of HP4 and (4-(trifluoromethyl)phenyl)boronic acid using (lauryldimethylammonio)acetate as the surfactant analysed by DNA mass spectrometry gradient A.

Expected: 4901.9907  
Observed: 4902.0109

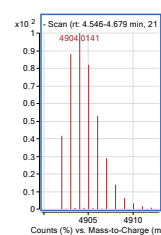

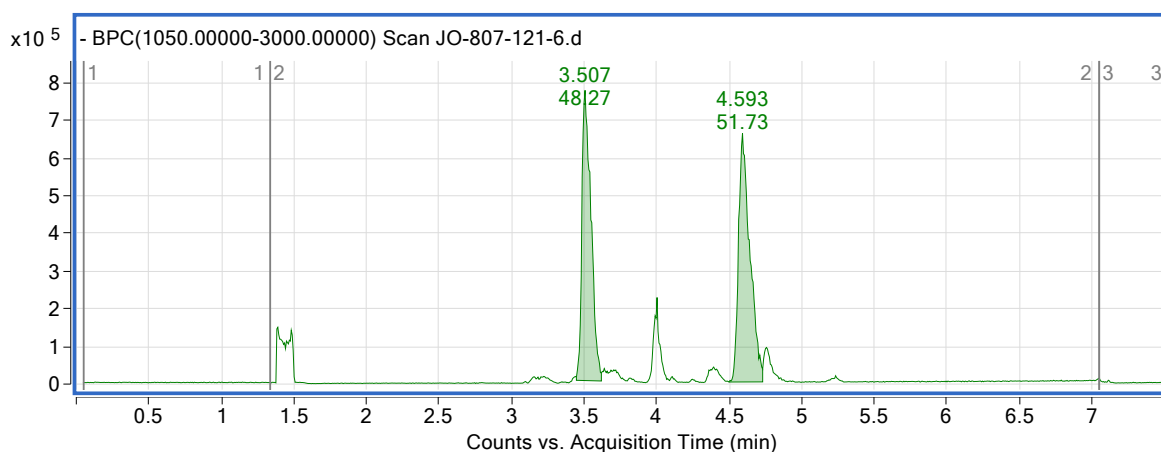

Figure S49: Mass spectrum of DNA-tagged product of Suzuki-Miyaura cross-coupling of HP4 and (4-(trifluoromethyl)phenyl)boronic acid using 4-dodecylbenzenesulfonic acid as the surfactant analysed by DNA mass spectrometry gradient A.

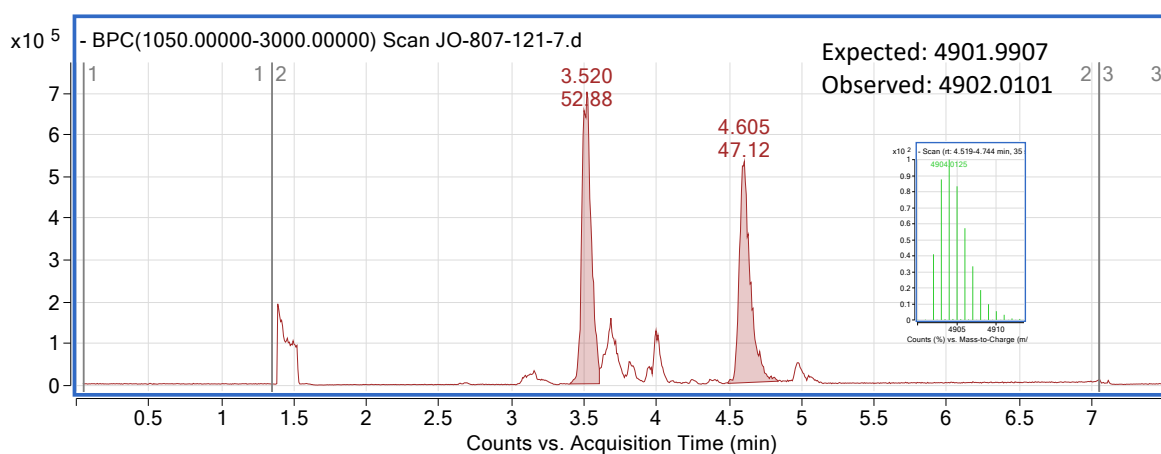

Figure S50: Mass spectrum of DNA-tagged product of Suzuki-Miyaura cross-coupling of HP4 and (4-(trifluoromethyl)phenyl)boronic acid using sulfobetaine-16 as the surfactant analysed by DNA mass spectrometry gradient A.

Expected: 4901.9907  
Observed: 4902.0089

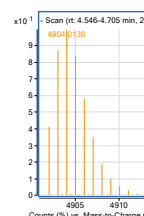

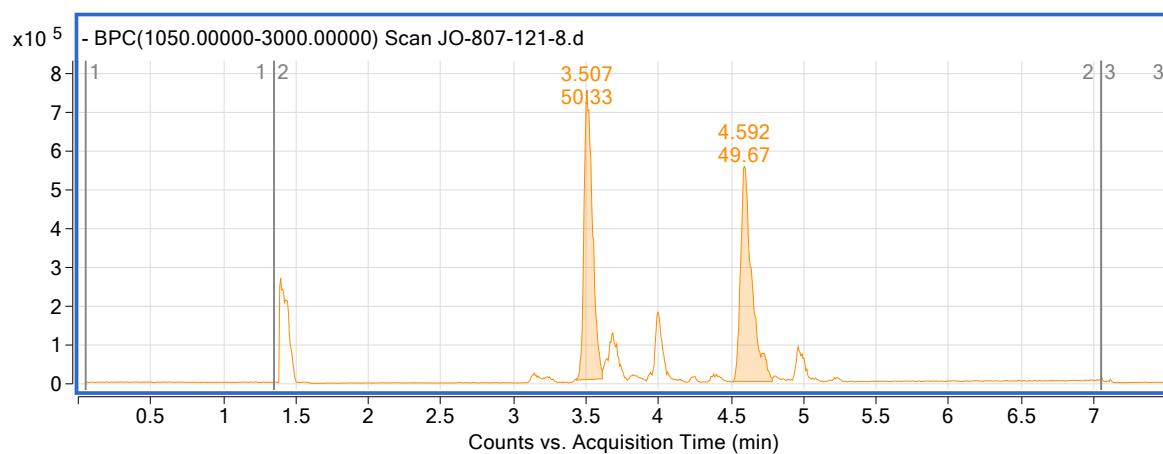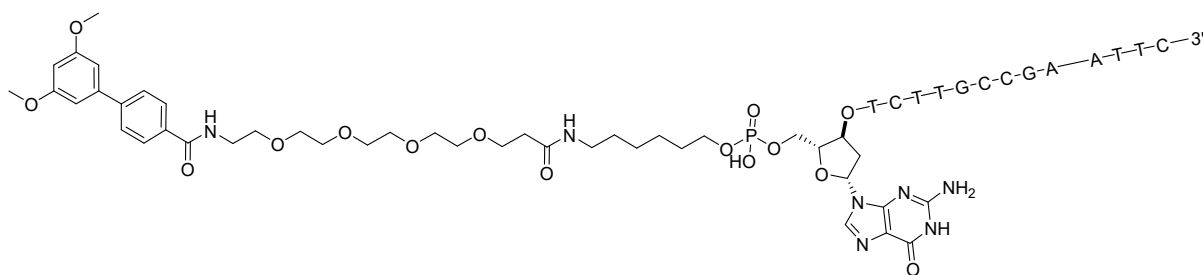

Figure S51: Mass spectrum of DNA-tagged product of Suzuki-Miyaura cross-coupling of HP4 and (3,5-dimethoxyphenyl)boronic acid using TPGS-750-M as the surfactant analysed by DNA mass spectrometry gradient A.

Expected: 4894.0244

Observed: 4894.0442

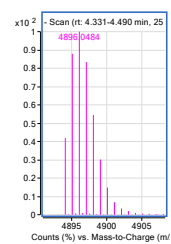

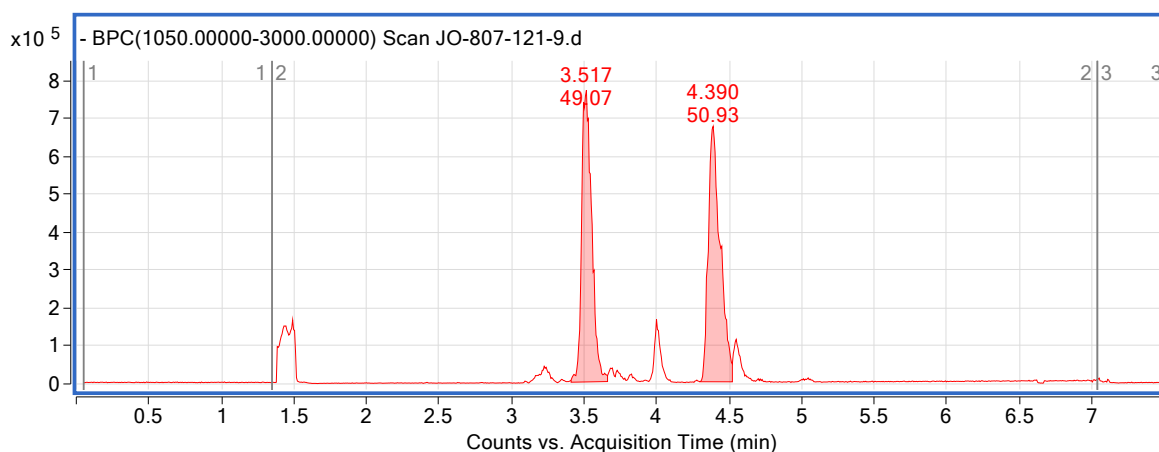

Figure S52: Mass spectrum of DNA-tagged product of Suzuki-Miyaura cross-coupling of HP4 and (3,5-dimethoxyphenyl)boronic acid using (lauryldimethylammonio)acetate as the surfactant analysed by DNA mass spectrometry gradient A.

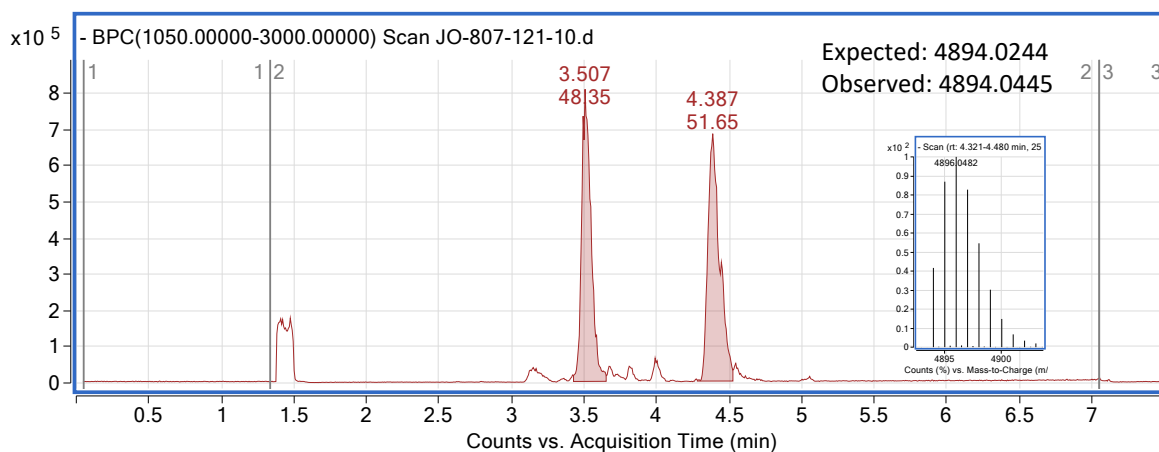

Figure S53: Mass spectrum of DNA-tagged product of Suzuki-Miyaura cross-coupling of HP4 and (3,5-dimethoxyphenyl)boronic acid using 4-dodecylbenzenesulfonic acid as the surfactant analysed by DNA mass spectrometry gradient A.

Expected: 4894.0244  
Observed: 4894.0440

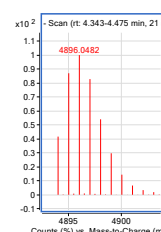

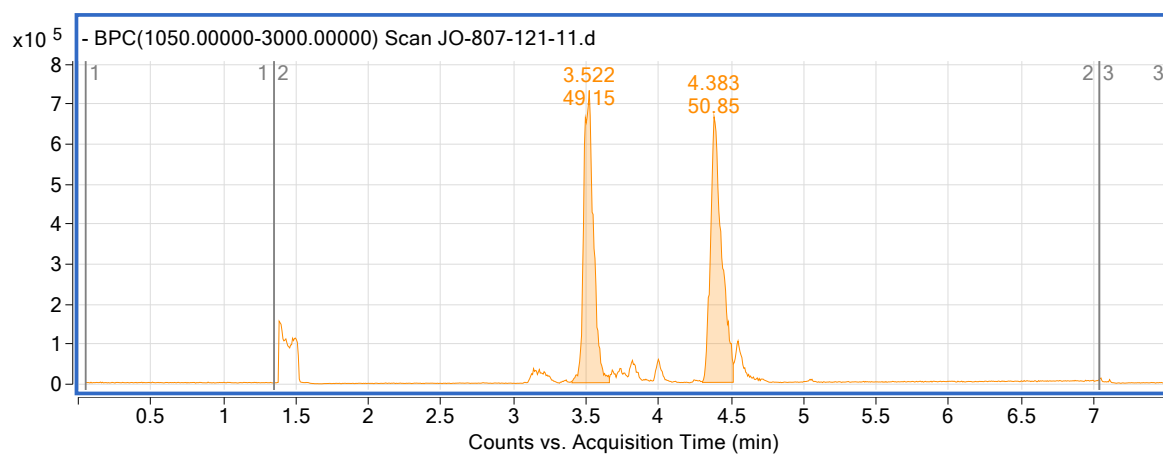

Figure S54: Mass spectrum of DNA-tagged product of Suzuki-Miyaura cross-coupling of HP4 and (3,5-dimethoxyphenyl)boronic acid using sulfobetaine-16 as the surfactant analysed by DNA mass spectrometry gradient A.

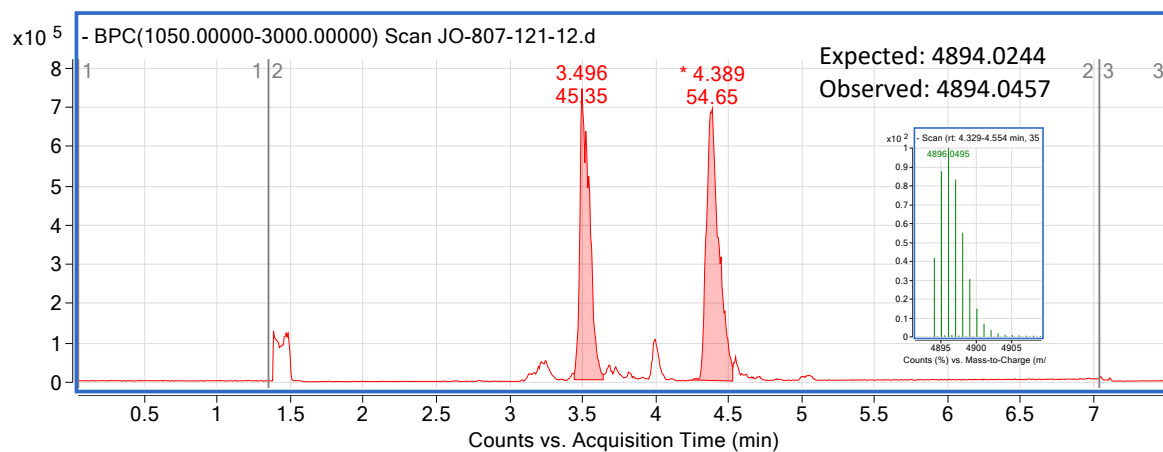

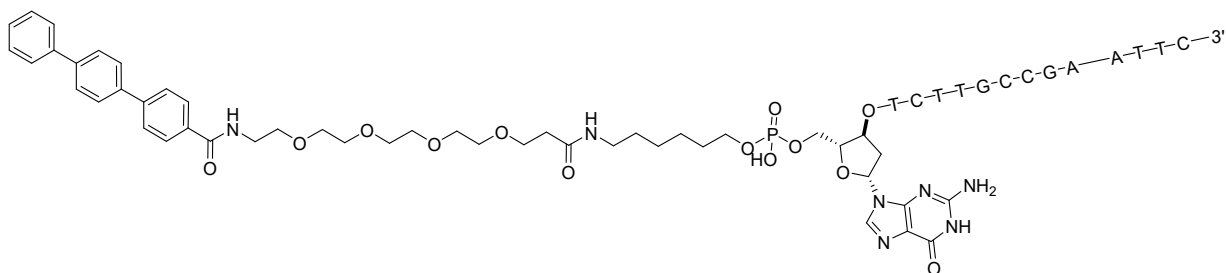

Figure S55: Mass spectrum of DNA-tagged product of Suzuki-Miyaura cross-coupling of HP4 and [1,1'-biphenyl]-3-ylboronic acid using TPGS-750-M as the surfactant analysed by DNA mass spectrometry gradient A.

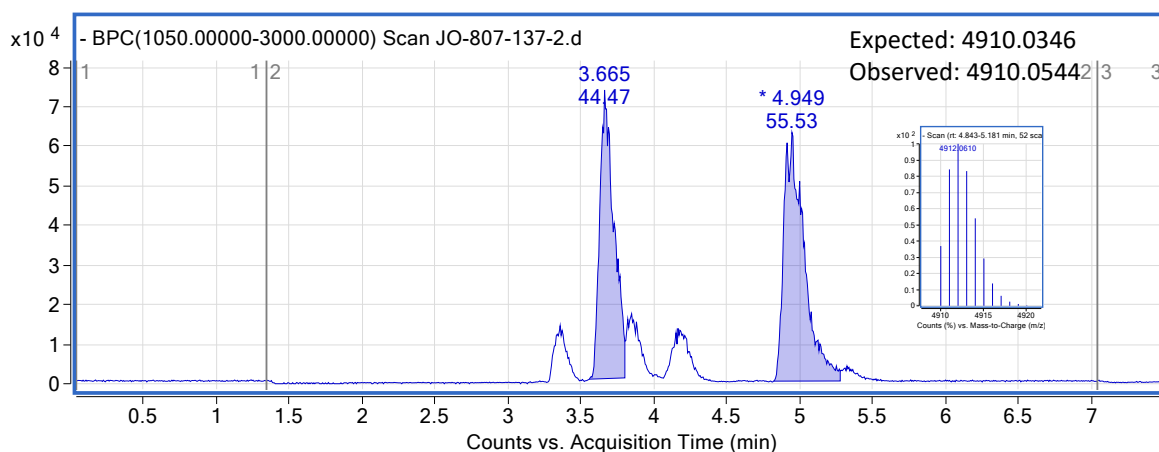

Figure S56: Mass spectrum of DNA-tagged product of Suzuki-Miyaura cross-coupling of HP4 and [1,1'-biphenyl]-3-ylboronic acid using (lauryldimethylammonio)acetate as the surfactant analysed by DNA mass spectrometry gradient A.

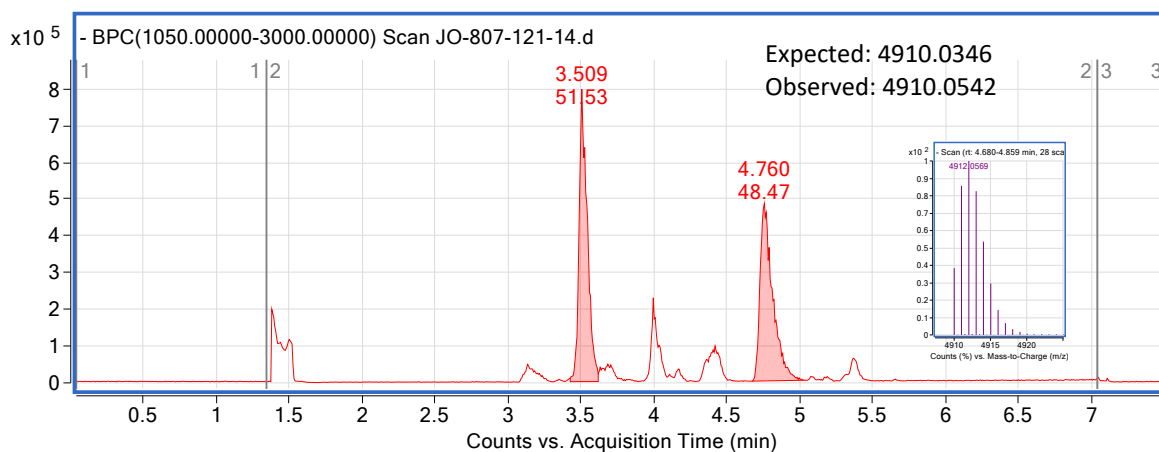

Figure S57: Mass spectrum of DNA-tagged product of Suzuki-Miyaura cross-coupling of HP4 and [1,1'-biphenyl]-3-ylboronic acid using 4-dodecylbenzenesulfonic acid as the surfactant analysed by DNA mass spectrometry gradient A.

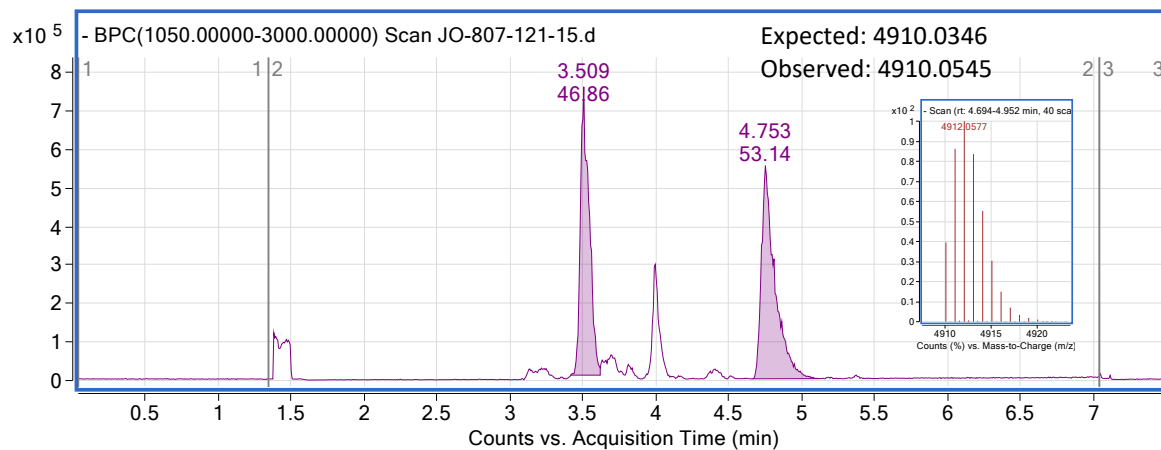

Figure S58: Mass spectrum of DNA-tagged product of Suzuki-Miyaura cross-coupling of HP4 and [1,1'-biphenyl]-3-ylboronic acid using sulfobetaine-16 as the surfactant analysed by DNA mass spectrometry gradient A.

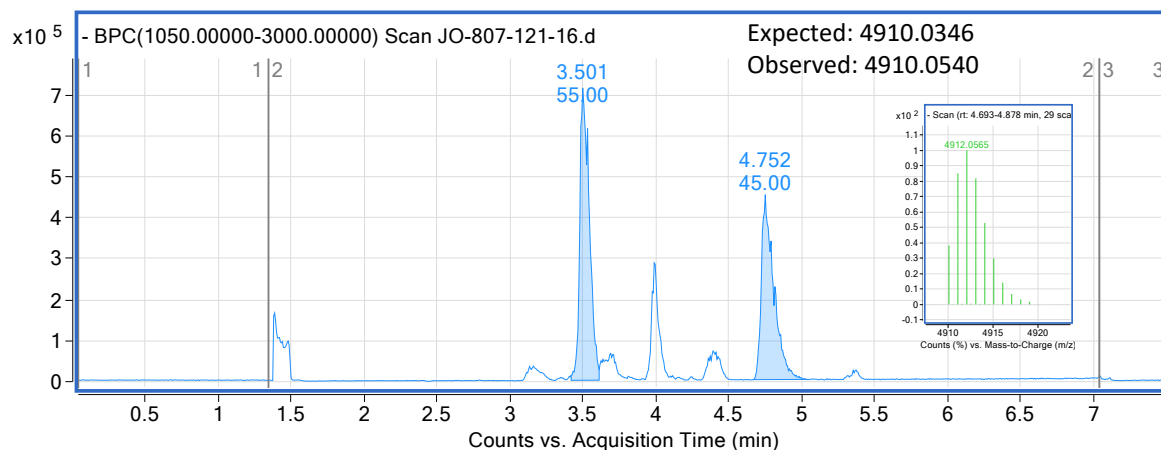

Table 4 Chromatograms

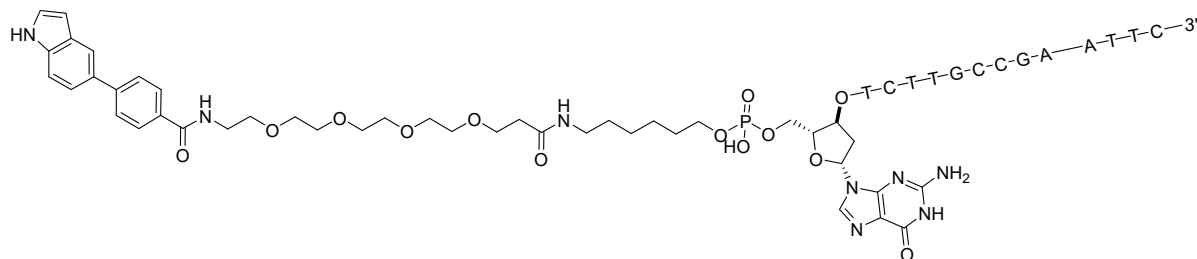

Figure S59: Mass spectrum of DNA-tagged product of Suzuki-Miyaura cross-coupling of HP4 and (1H-indol-5-yl)boronic acid using TPGS-750-M as the surfactant analysed by DNA mass spectrometry gradient A.

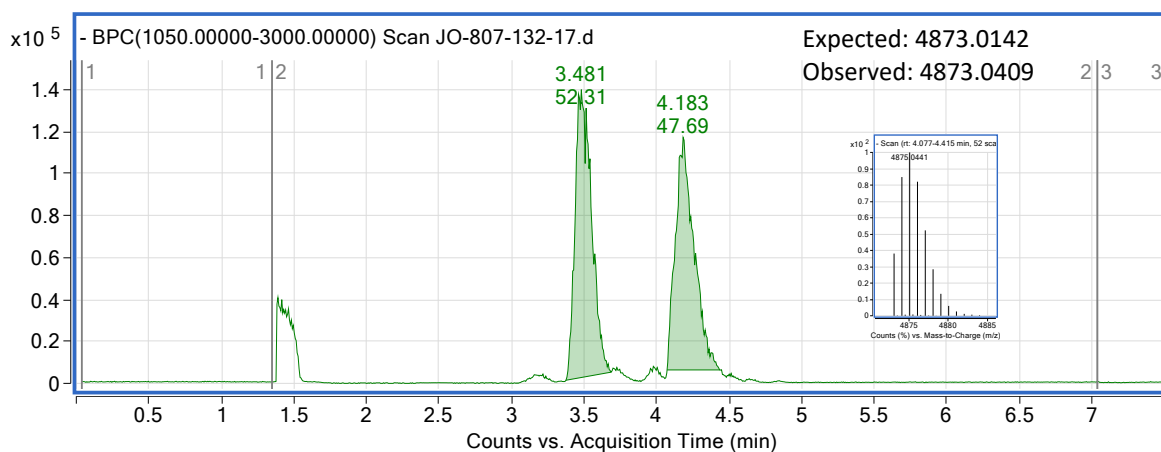

Figure S60: Mass spectrum of DNA-tagged product of Suzuki-Miyaura cross-coupling of HP4 and (1H-indol-5-yl)boronic acid using 4-dodecylbenzenesulfonic acid as the surfactant analysed by DNA mass spectrometry gradient A.

Expected: 4873.0142  
Observed: 4873.0529

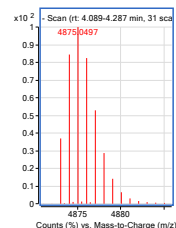



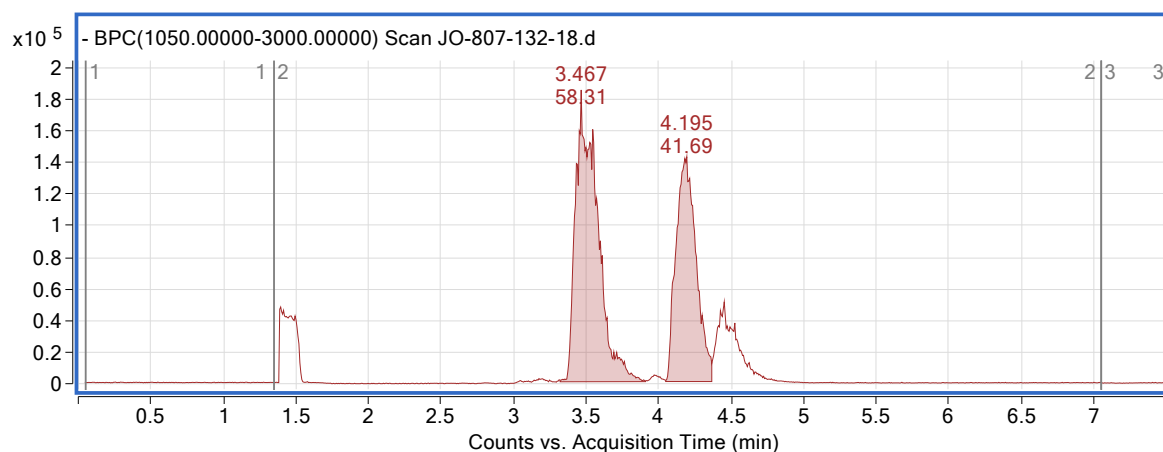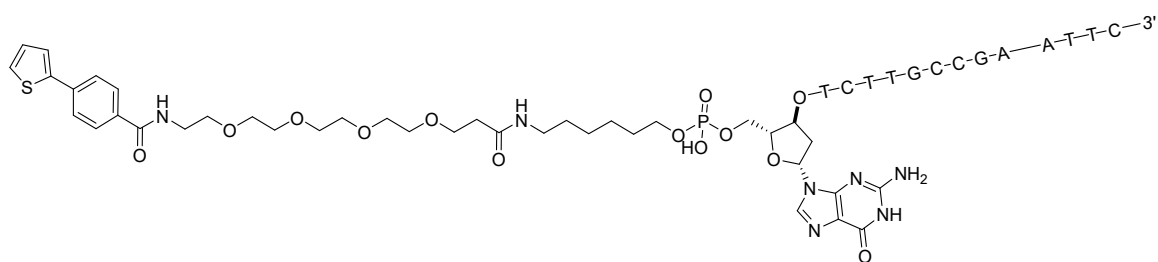

Figure S61: Mass spectrum of DNA-tagged product of Suzuki-Miyaura cross-coupling of HP4 and thiophen-2-ylboronic acid using TPGS-750-M as the surfactant analysed by DNA mass spectrometry gradient A.

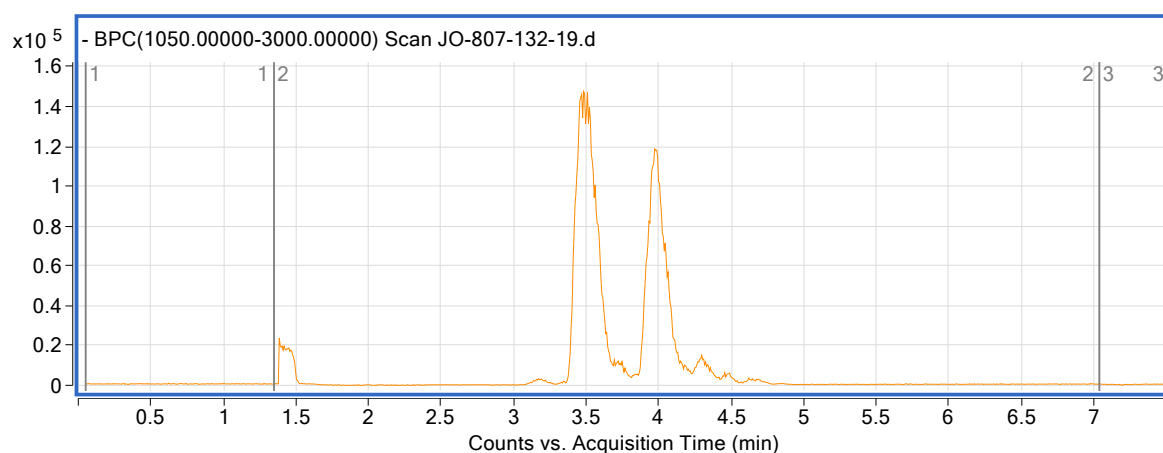

Figure S62: Mass spectrum of DNA-tagged product of Suzuki-Miyaura cross-coupling of HP4 and thiophen-2-ylboronic acid using 4-dodecylbenzenesulfonic acid as the surfactant analysed by DNA mass spectrometry gradient A.

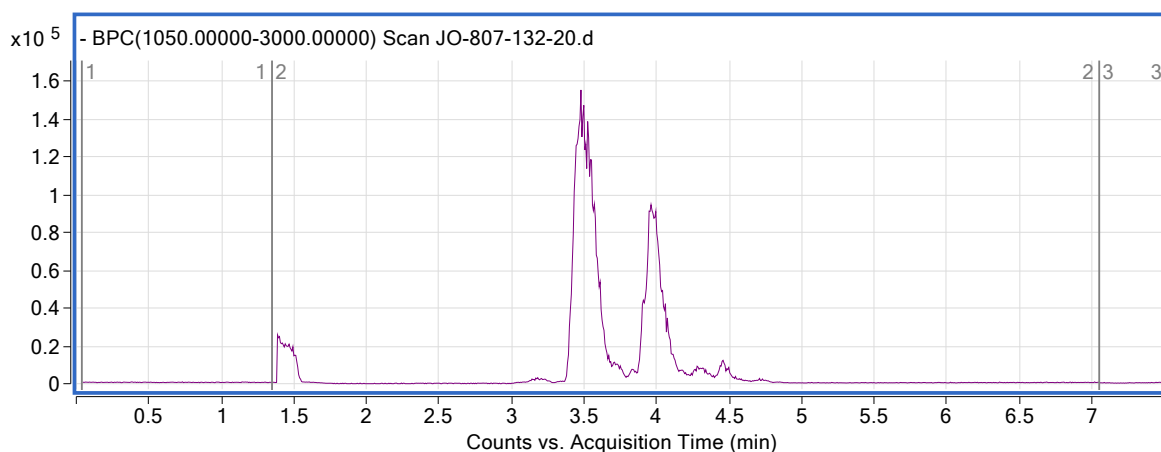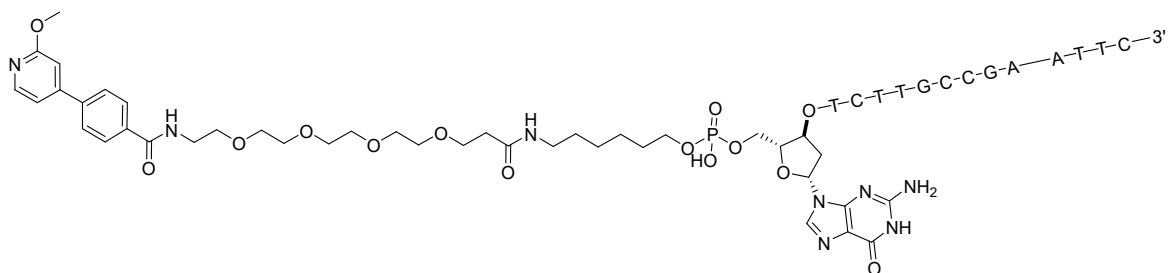

Figure S63: Mass spectrum of DNA-tagged product of Suzuki-Miyaura cross-coupling of HP4 and (2-methoxypyridin-4-yl)boronic acid using TPGS-750-M as the surfactant analysed by DNA mass spectrometry gradient A.

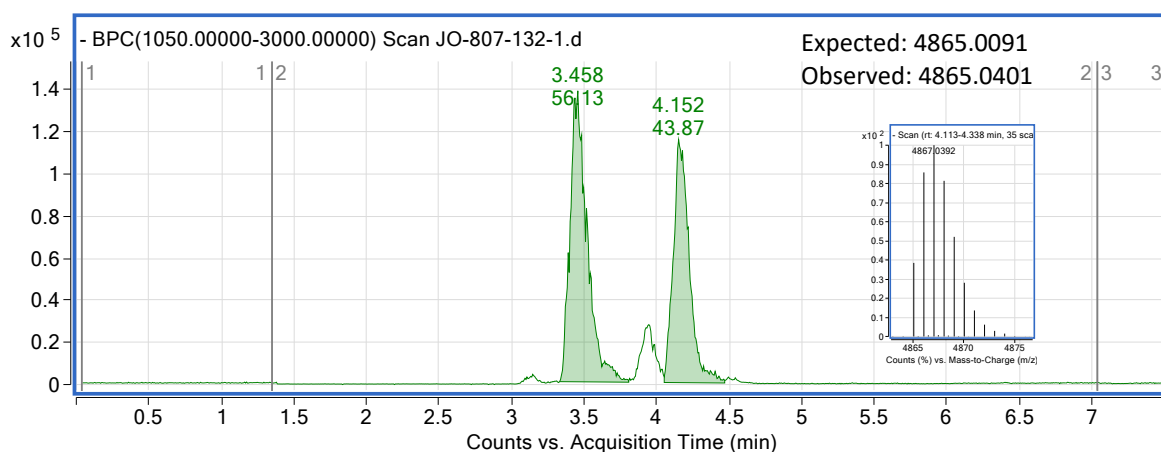

Figure S64: Mass spectrum of DNA-tagged product of Suzuki-Miyaura cross-coupling of HP4 and (2-methoxypyridin-4-yl)boronic acid using 4-dodecylbenzenesulfonic acid as the surfactant analysed by DNA mass spectrometry gradient A.

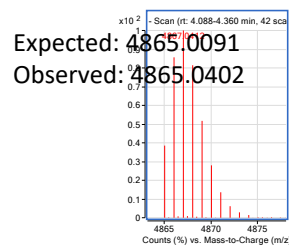

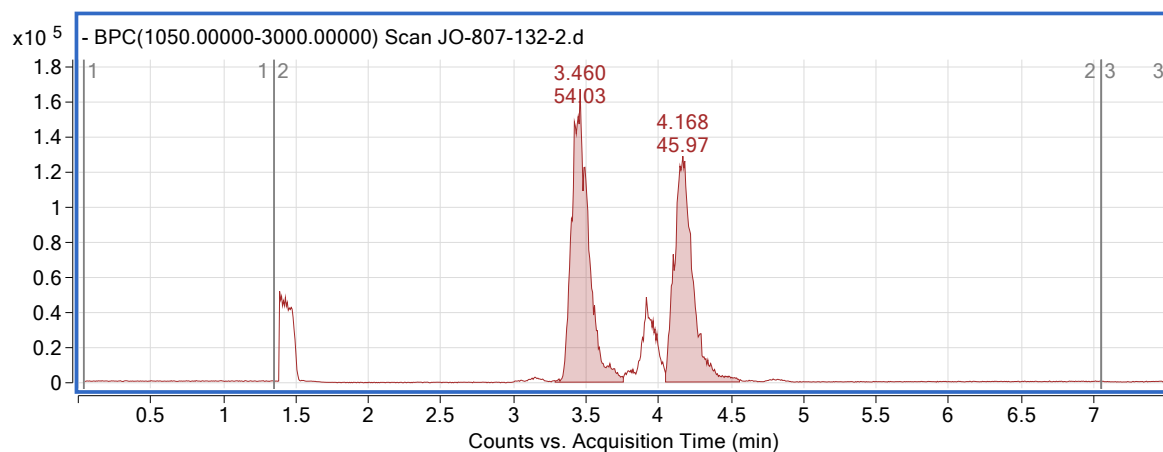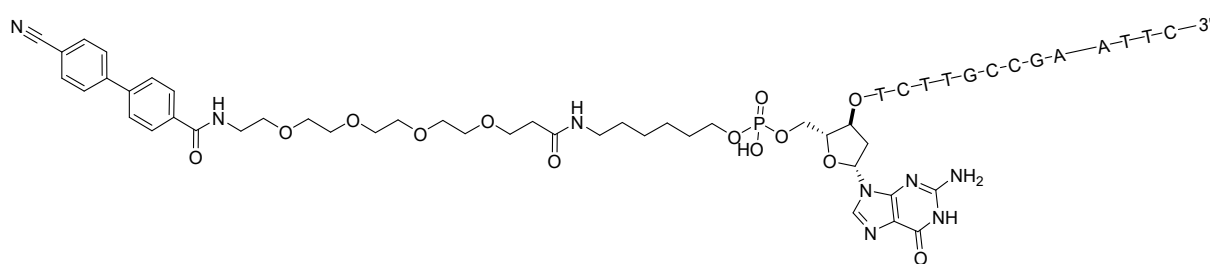

Figure S65: Mass spectrum of DNA-tagged product of Suzuki-Miyaura cross-coupling of HP4 and (4-cyanophenyl)boronic acid using TPGS-750-M as the surfactant analysed by DNA mass spectrometry gradient A.

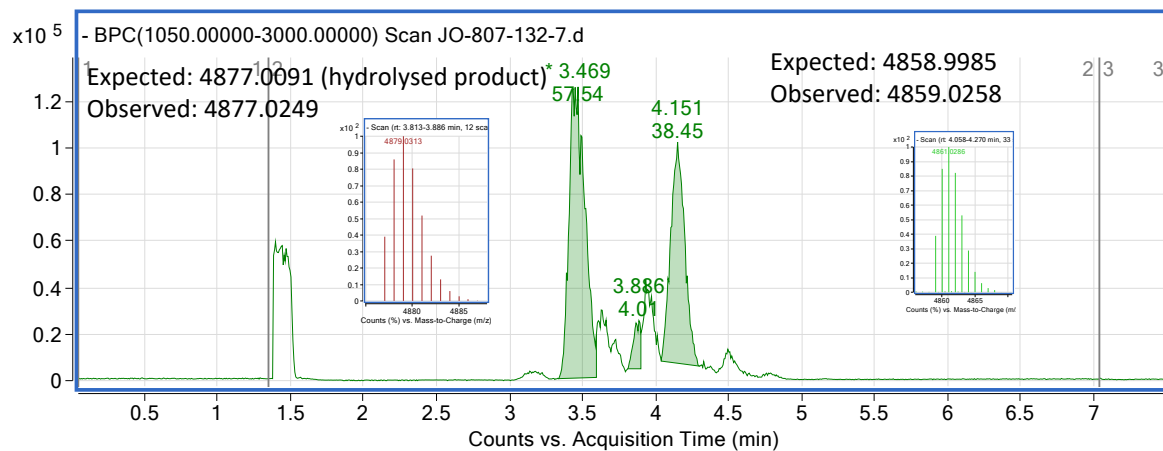

Figure S66: Mass spectrum

of DNA-tagged product of

Suzuki-

Expected: 4877.0091 (hydrolysed product)

Expected: 4858.9985

Observed: 4859.0258

Miyaura cross-coupling of HP4 and (4-cyanophenyl)boronic acid using 4-dodecylbenzenesulfonic acid as the surfactant analysed by DNA mass spectrometry gradient A.

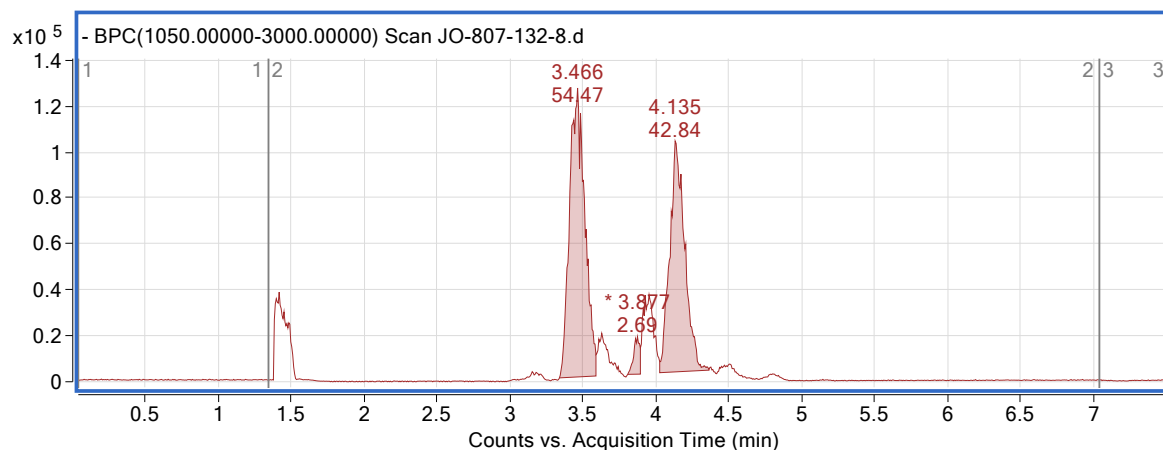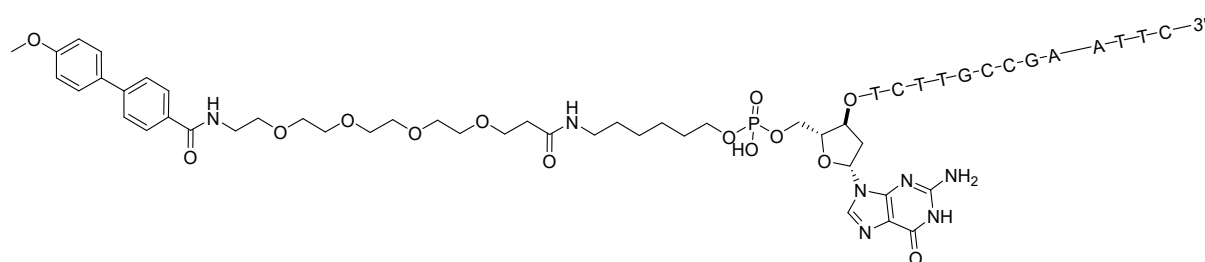

Figure S67: Mass spectrum of DNA-tagged product of Suzuki-Miyaura cross-coupling of HP4 and (4-methoxyphenyl)boronic acid using TPGS-750-M as the surfactant analysed by DNA mass spectrometry gradient A.

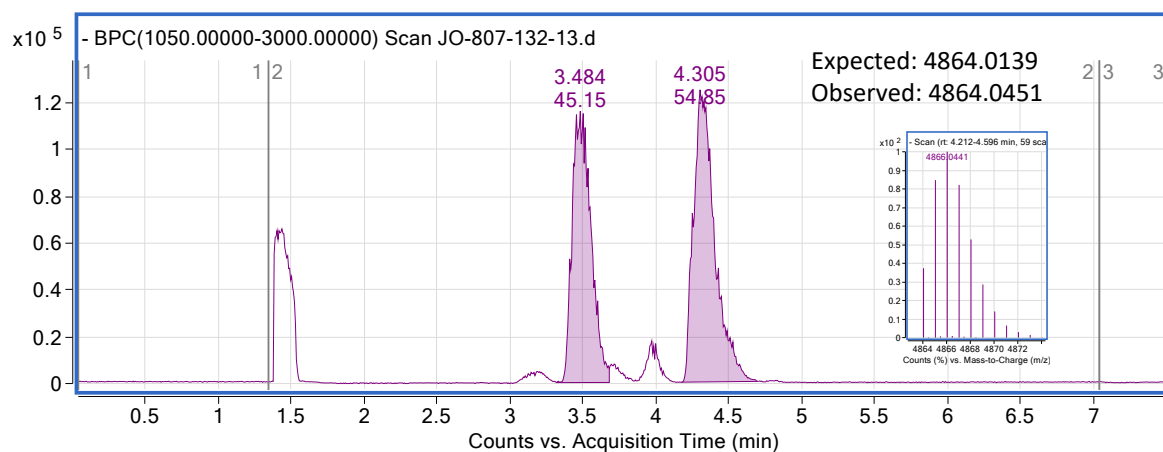

Figure S68: Mass spectrum of DNA-tagged product of Suzuki-Miyaura cross-coupling of HP4 and (4-methoxyphenyl)boronic acid using 4-dodecylbenzenesulfonic acid as the surfactant analysed by DNA mass spectrometry gradient A.

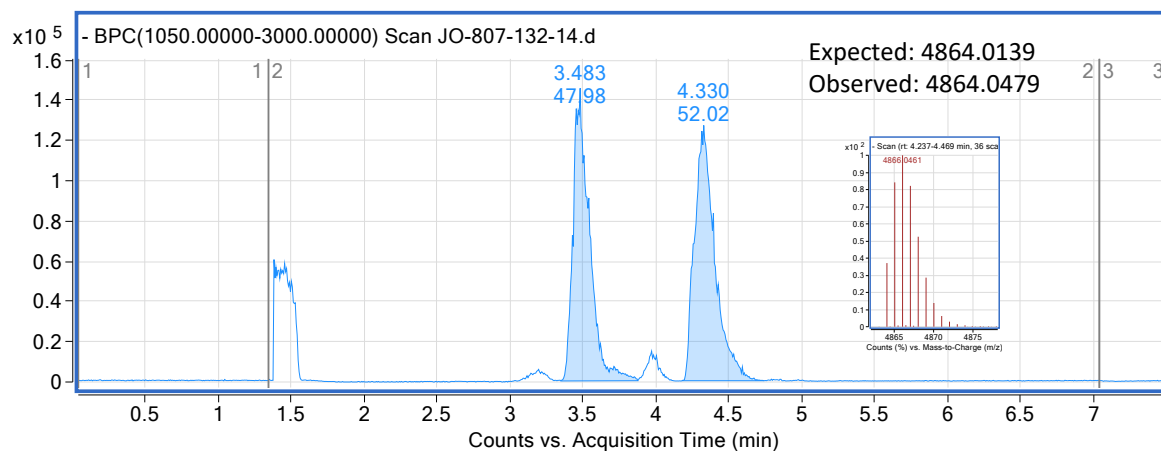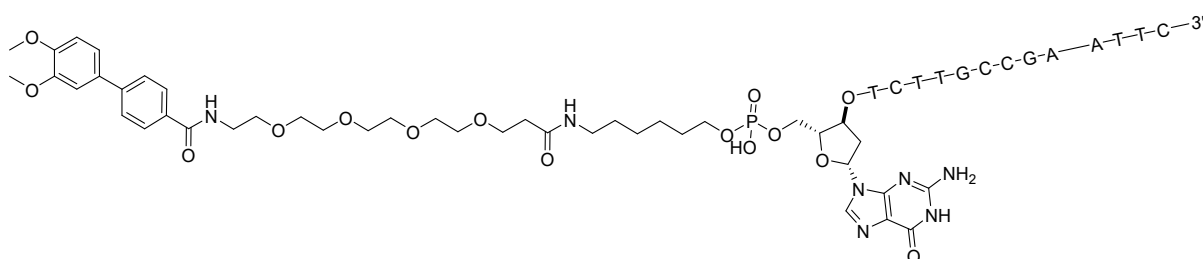

Figure S69: Mass spectrum of DNA-tagged product of Suzuki-Miyaura cross-coupling of HP4 and (3,4-dimethoxyphenyl)boronic acid using TPGS-750-M as the surfactant analysed by DNA mass spectrometry gradient A.

Expected: 4894.0244  
Observed: 4894.0592

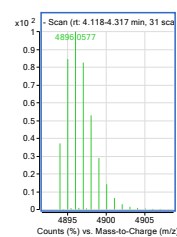

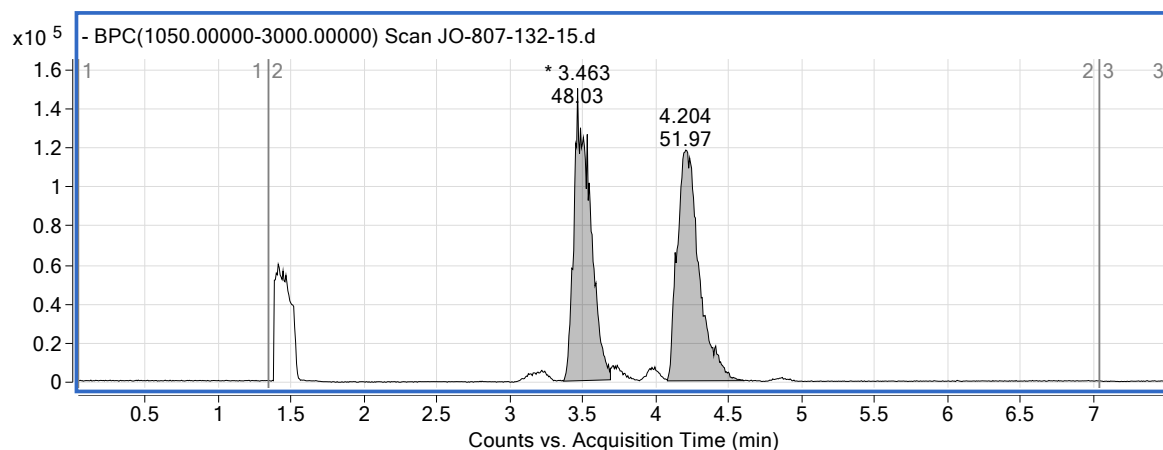

Figure S70: Mass spectrum of DNA-tagged product of Suzuki-Miyaura cross-coupling of HP4 and (3,4-dimethoxyphenyl)boronic acid using 4-dodecylbenzenesulfonic acid as the surfactant analysed by DNA mass spectrometry gradient A.

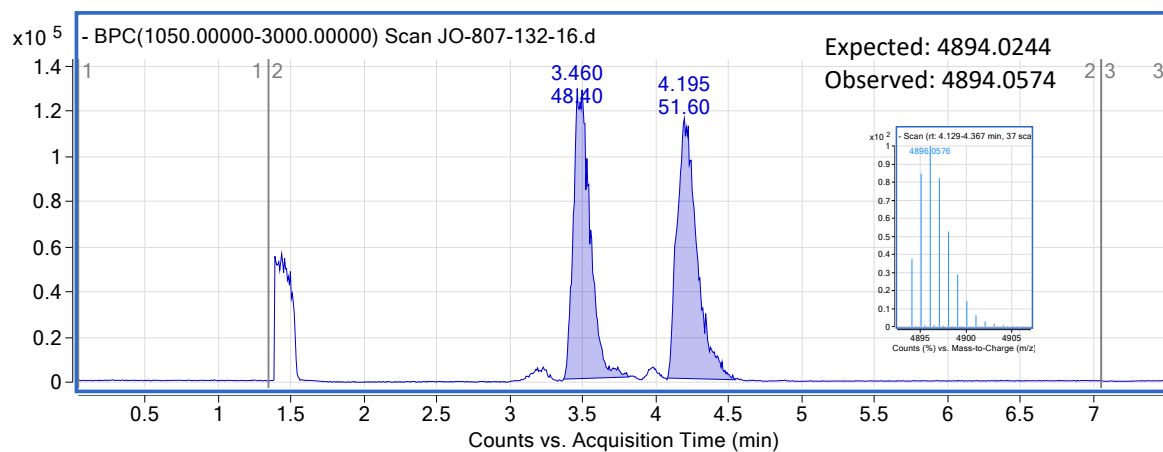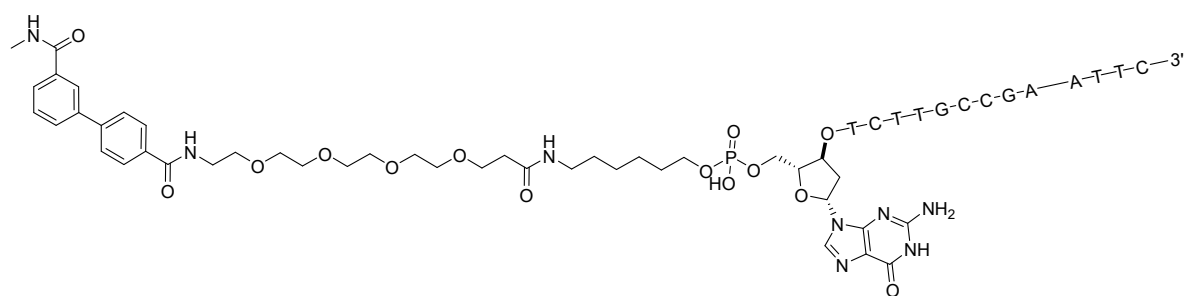

Figure S71: Mass spectrum of DNA-tagged product of Suzuki-Miyaura cross-coupling of HP4 and (3-(methylcarbamoyl)phenyl)boronic acid using TPGS-750-M as the surfactant analysed by DNA mass spectrometry gradient A.

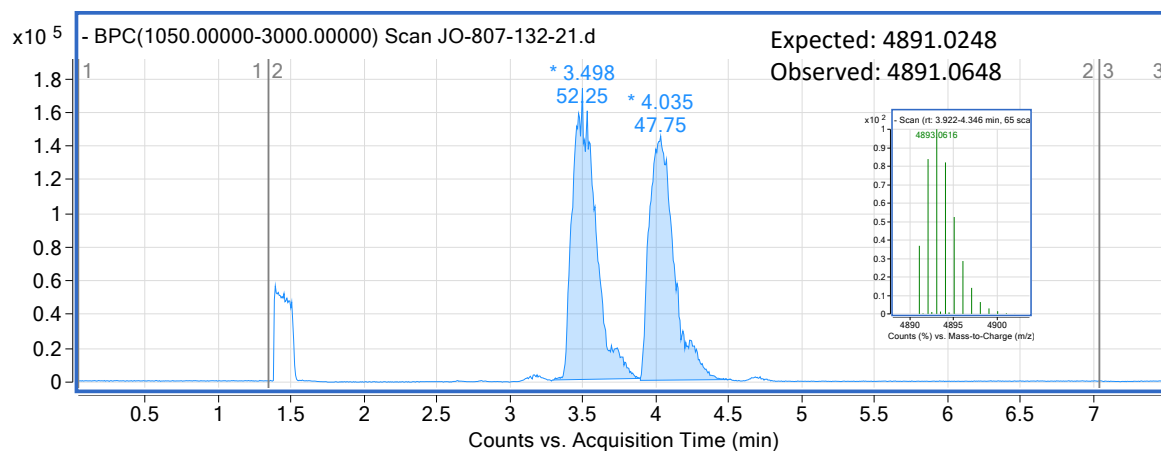

Figure S72: Mass spectrum of DNA-tagged product of Suzuki-Miyaura cross-coupling of HP4 and (3-(methylcarbamoyl)phenyl)boronic acid using 4-dodecylbenzenesulfonic acid as the surfactant analysed by DNA mass spectrometry gradient A.

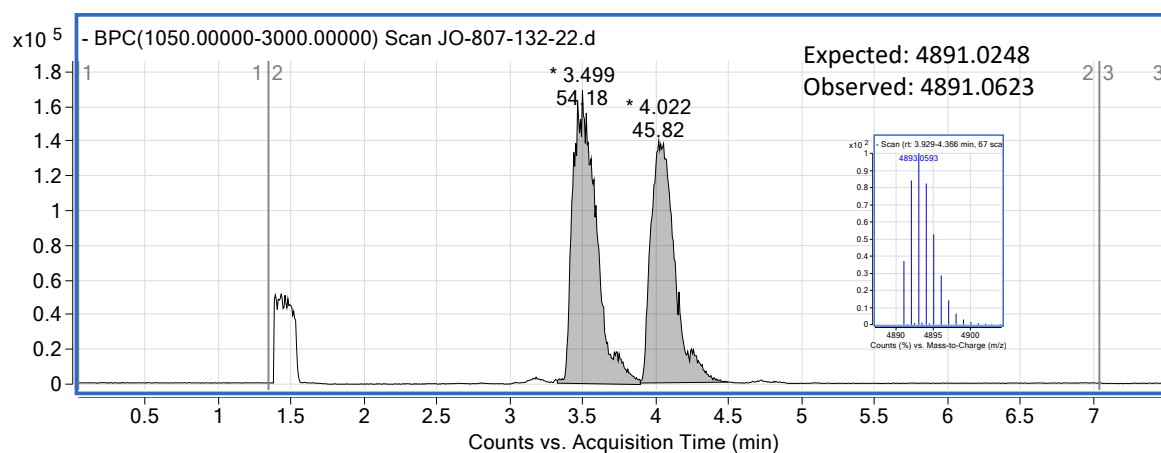

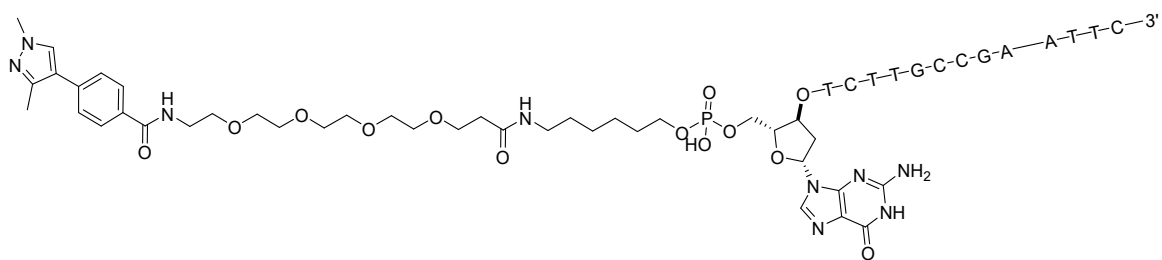

Figure S73: Mass spectrum of DNA-tagged product of Suzuki-Miyaura cross-coupling of HP4 and 1,3-dimethyl-4-(4,4,5,5-tetramethyl-1,3,2-dioxaborolan-2-yl)-1*H*-pyrazole using TPGS-750-M as the surfactant analysed by DNA mass spectrometry gradient A.

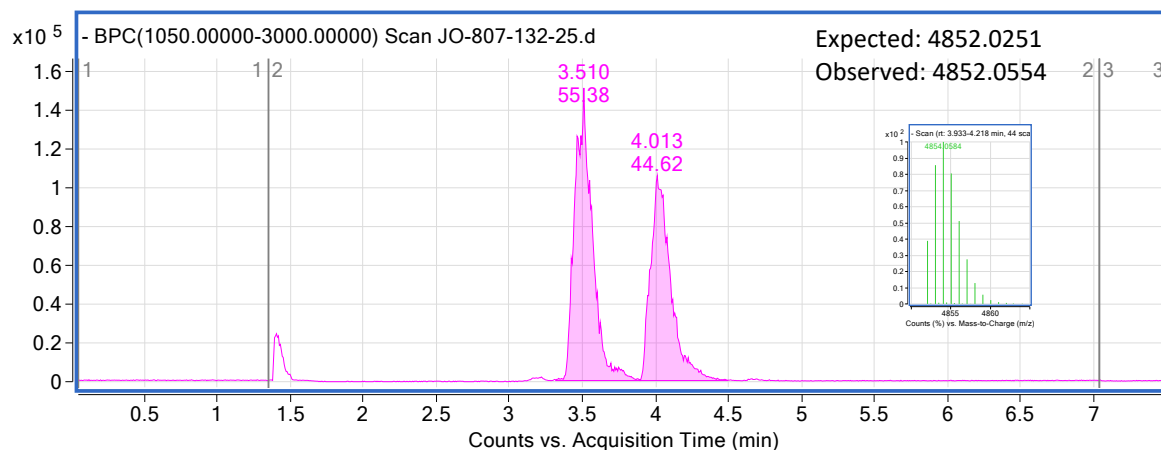

Figure S74: Mass spectrum of DNA-tagged product of Suzuki-Miyaura cross-coupling of HP4 and 1,3-dimethyl-4-(4,4,5,5-tetramethyl-1,3,2-dioxaborolan-2-yl)-1*H*-pyrazole using 4-dodecylbenzenesulfonic acid as the surfactant analysed by DNA mass spectrometry gradient A.

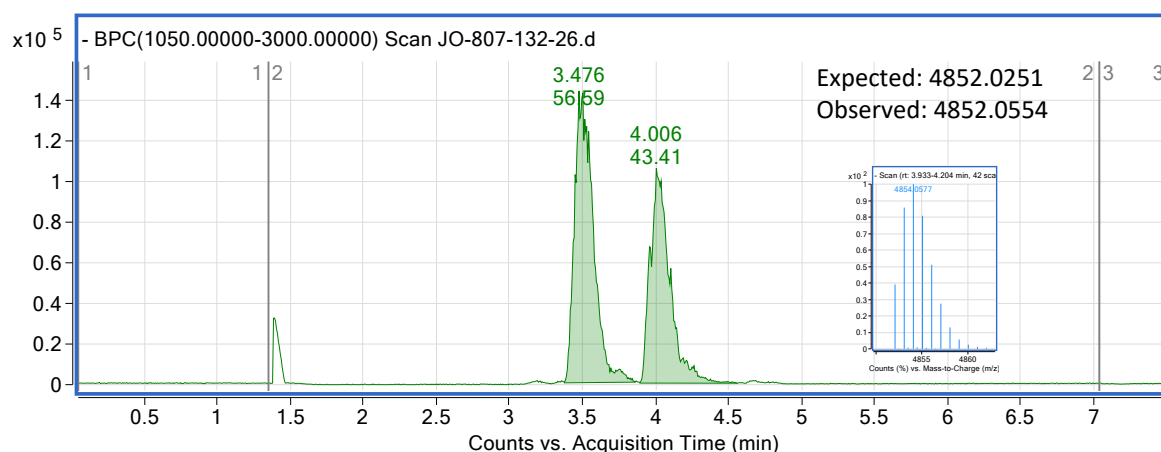



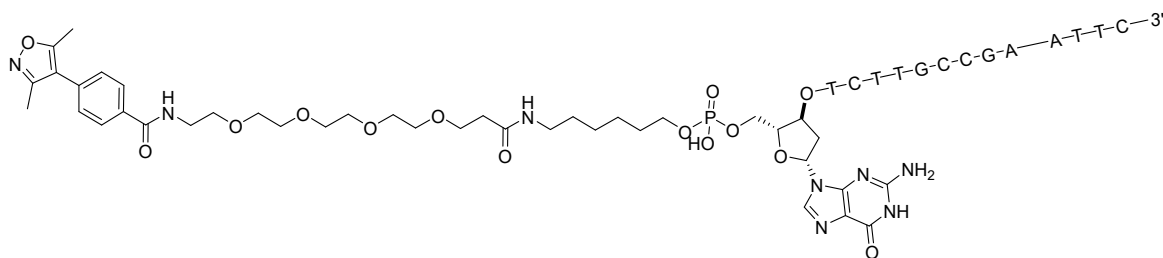

Figure S75: Mass spectrum of DNA-tagged product of Suzuki-Miyaura cross-coupling of HP4 and 3,5-dimethyl-4-(4,4,5,5-tetramethyl-1,3,2-dioxaborolan-2-yl)isoxazole using TPGS-750-M as the surfactant analysed by DNA mass spectrometry gradient A.

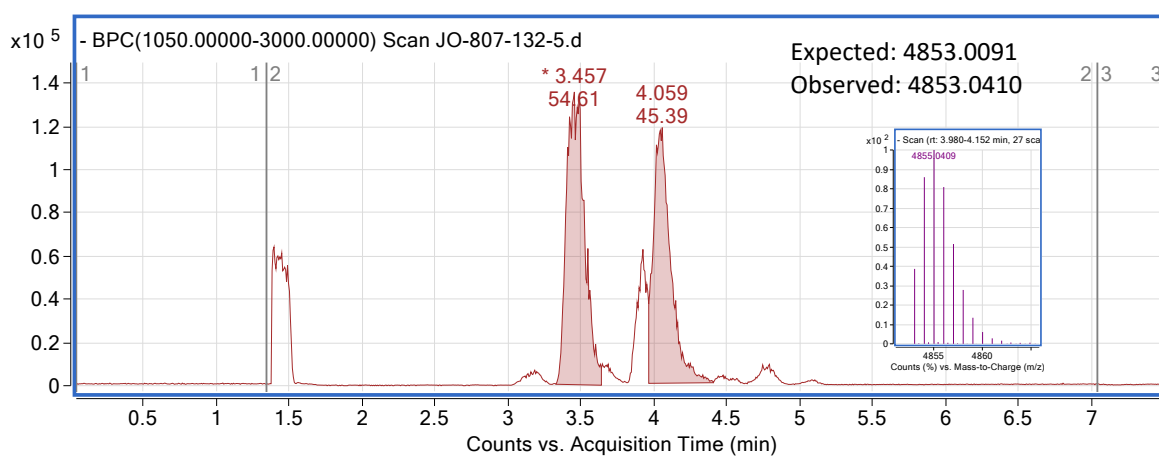

Figure S76: Mass spectrum of DNA-tagged product of Suzuki-Miyaura cross-coupling of HP4 and 3,5-dimethyl-4-(4,4,5,5-tetramethyl-1,3,2-dioxaborolan-2-yl)isoxazole using 4-dodecylbenzenesulfonic acid as the surfactant analysed by DNA mass spectrometry gradient A.

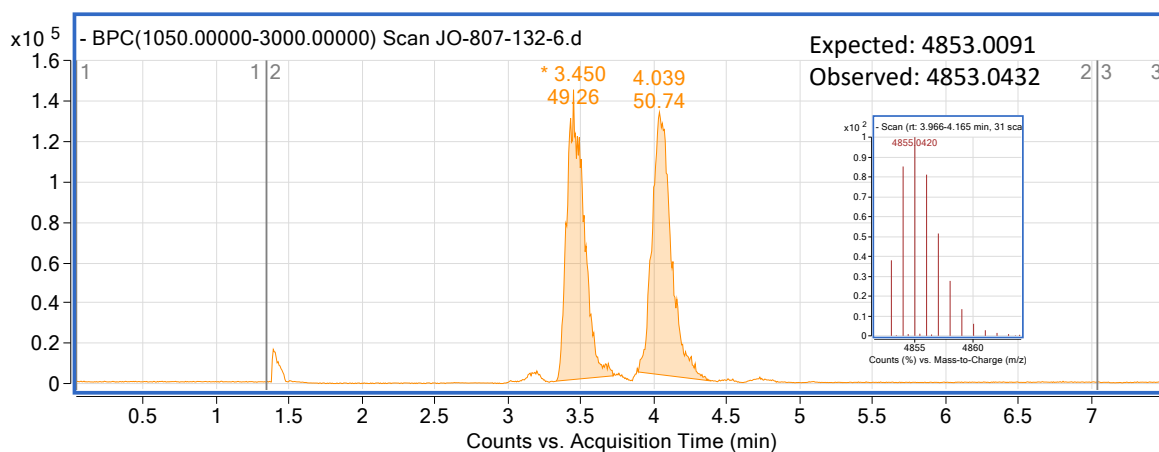

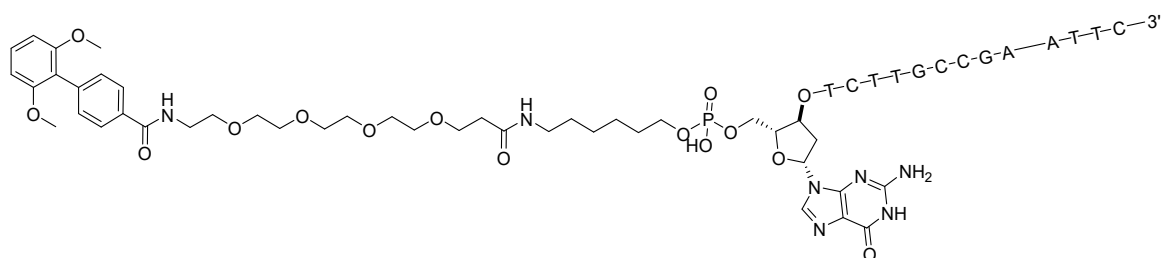

Figure S77: Mass spectrum of DNA-tagged product of Suzuki-Miyaura cross-coupling of HP4 and (2,6-dimethoxyphenyl)boronic acid using TPGS-750-M as the surfactant analysed by DNA mass spectrometry gradient A.

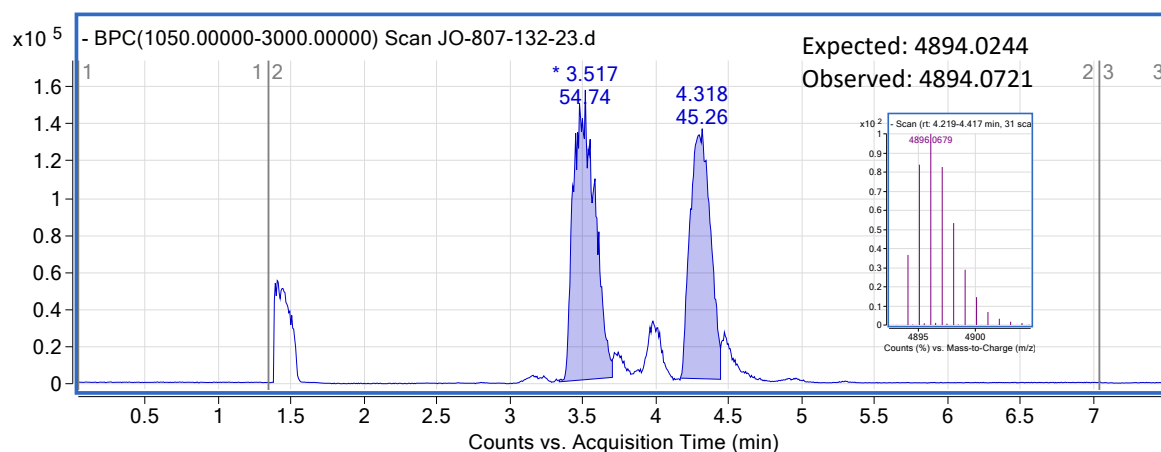

Figure S78: Mass spectrum of DNA-tagged product of Suzuki-Miyaura cross-coupling of HP4 and (2,6-dimethoxyphenyl)boronic acid using 4-dodecylbenzenesulfonic acid as the surfactant analysed by DNA mass spectrometry gradient A.

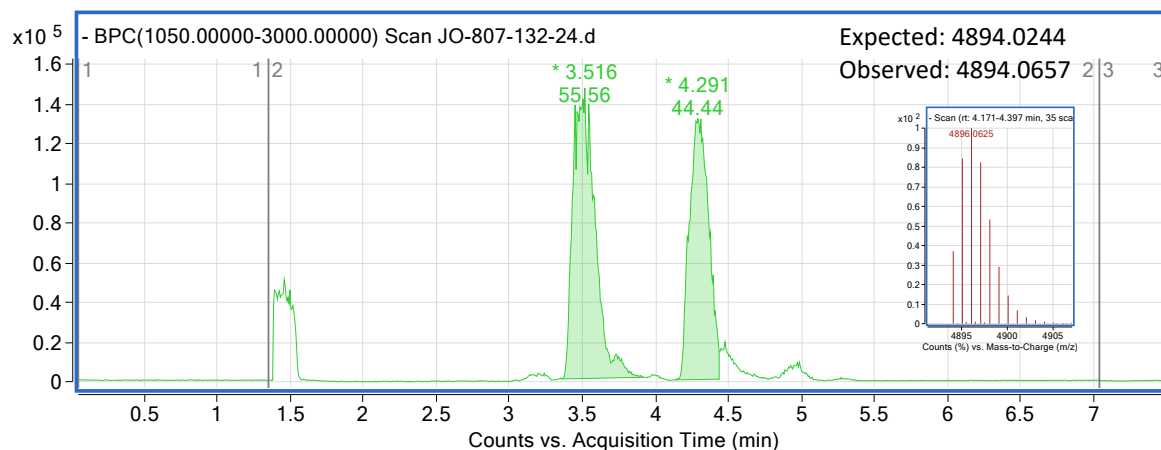

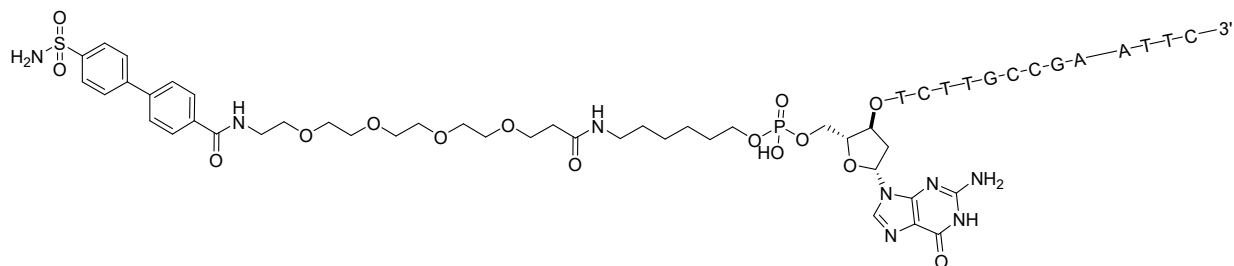

Figure S79: Mass spectrum of DNA-tagged product of Suzuki-Miyaura cross-coupling of HP4 and (4-sulfamoylphenyl)boronic acid using TPGS-750-M as the surfactant analysed by DNA mass spectrometry gradient A.

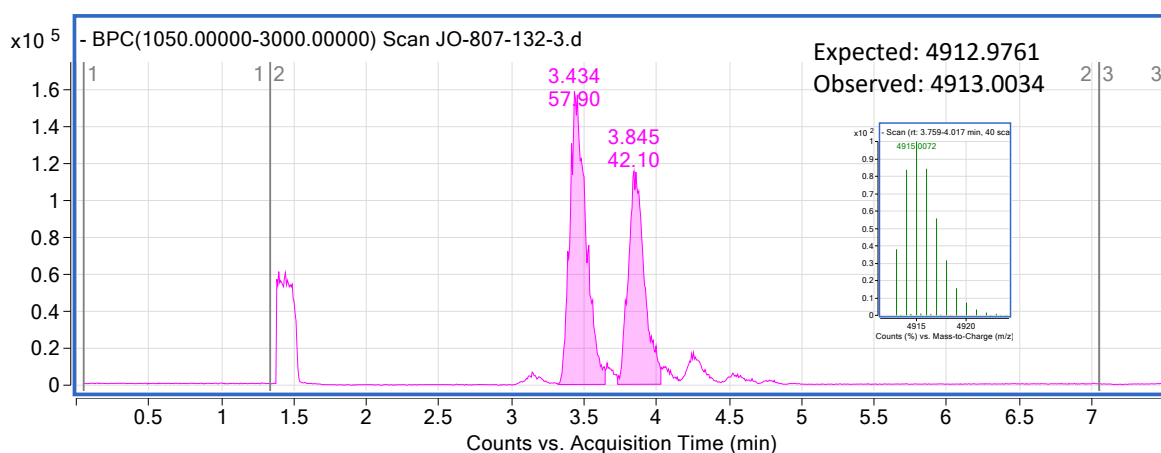

Figure S80: Mass spectrum of DNA-tagged product of Suzuki-Miyaura cross-coupling of HP4 and (4-sulfamoylphenyl)boronic acid using 4-dodecylbenzenesulfonic acid as the surfactant analysed by DNA mass spectrometry gradient A.

Expected: 4912.9761  
Observed: 4913.0056

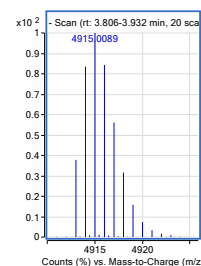

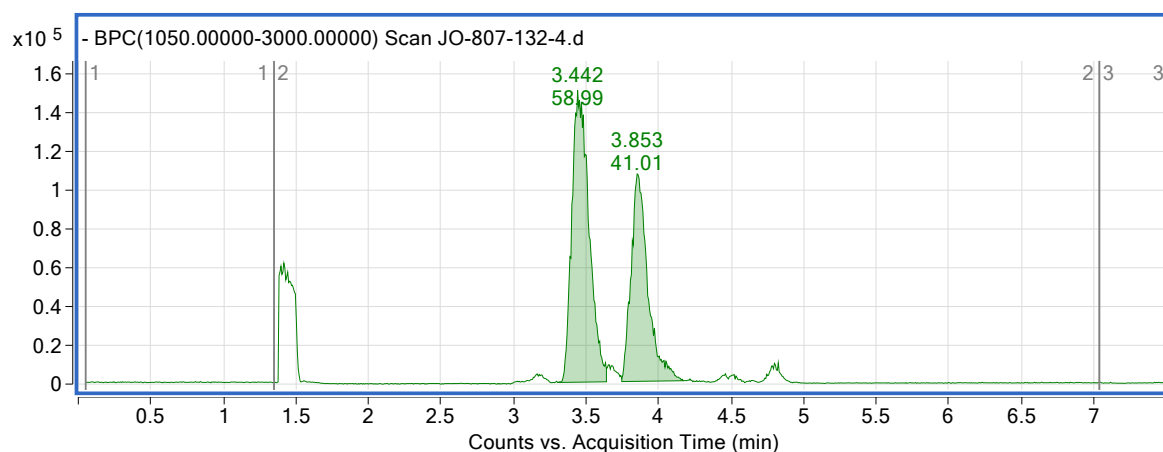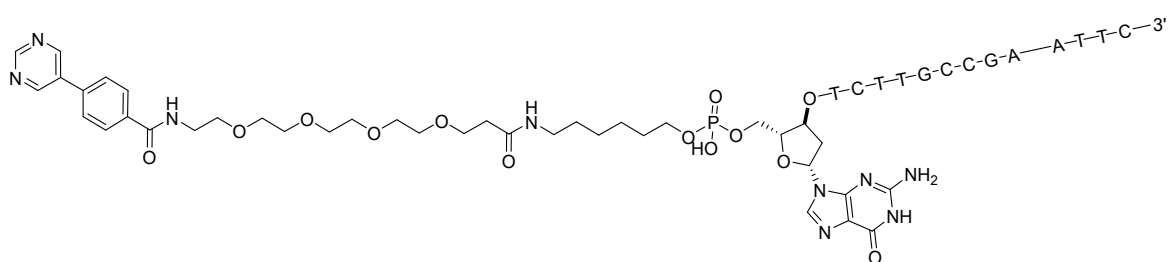

Fig

ure S81: Mass spectrum of DNA-tagged product of Suzuki-Miyaura cross-coupling of HP4 and pyrimidin-5-ylboronic acid using TPGS-750-M as the surfactant analysed by DNA mass spectrometry gradient A.

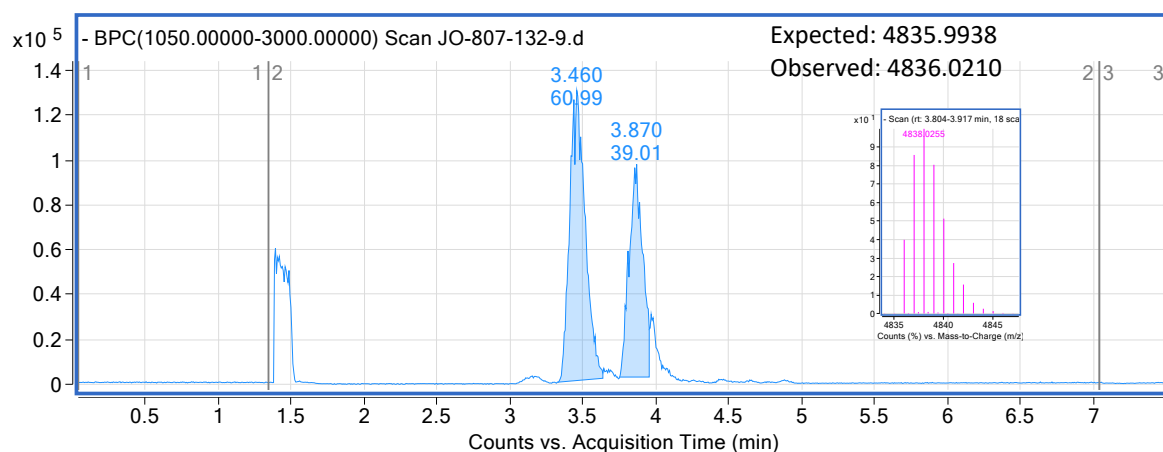

Figure S82: Mass spectrum of DNA-tagged product of Suzuki-Miyaura cross-coupling of HP4 and pyrimidin-5-ylboronic acid using 4-dodecylbenzenesulfonic acid as the

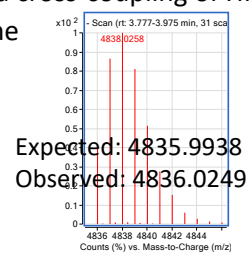

surfactant analysed by DNA mass spectrometry gradient A.

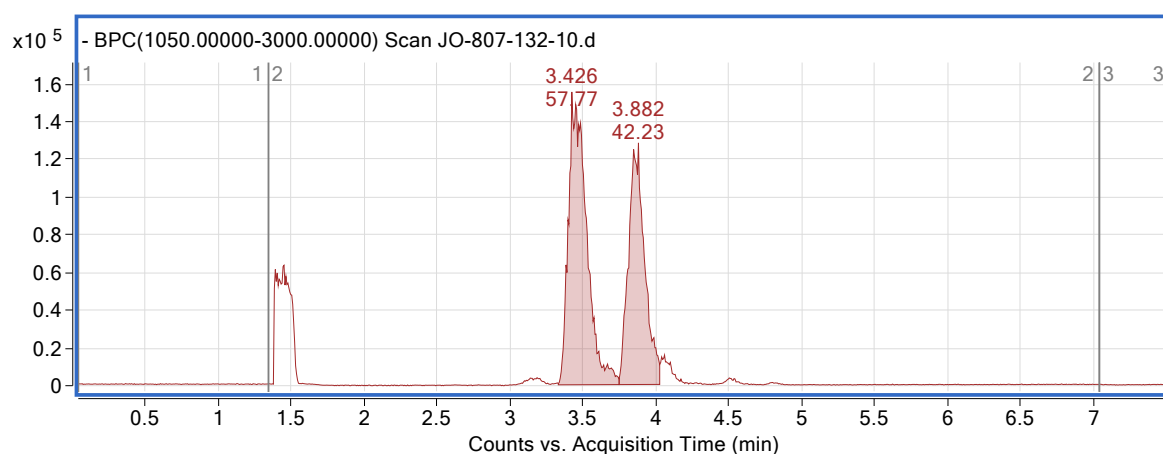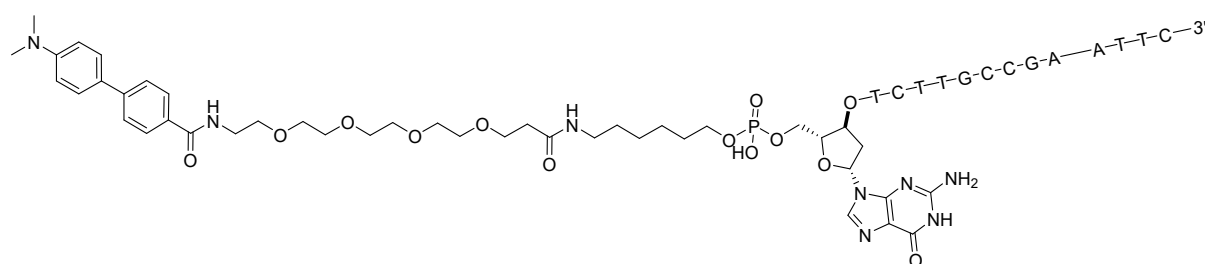

Figure S83: Mass spectrum of DNA-tagged product of Suzuki-Miyaura cross-coupling of HP4 and (4-(dimethylamino)phenyl)boronic acid using TPGS-750-M as the surfactant analysed by DNA mass spectrometry gradient A.

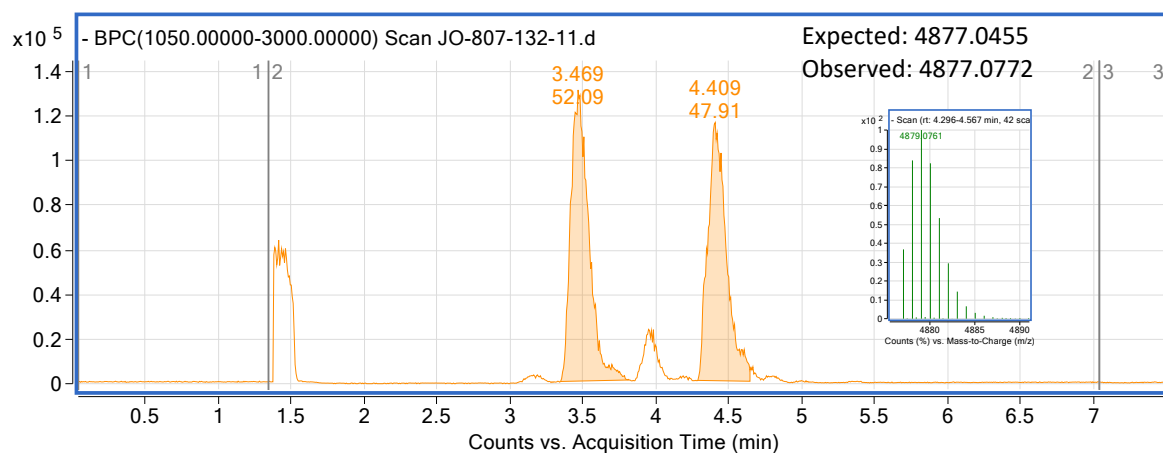

Figure S84: Mass spectrum of DNA-tagged product of Suzuki-Miyaura cross-coupling of HP4 and (4-(dimethylamino)phenyl)boronic acid using 4-dodecylbenzenesulfonic acid as the surfactant analysed by DNA mass spectrometry gradient A.

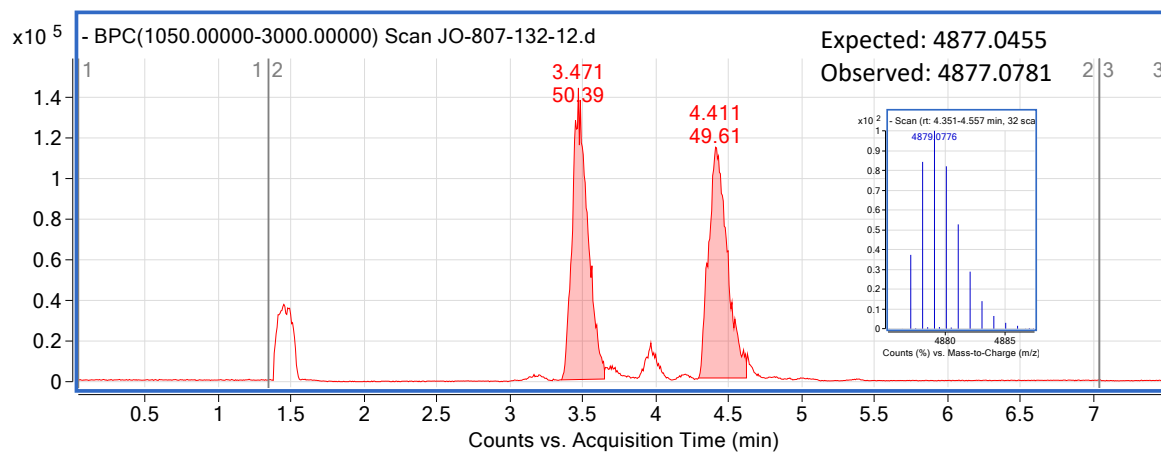

## On-DNA Reductive Amination Reaction of DNA-Conjugated Amine HP2

### Table 5 Chromatograms

Compound 4 was synthesised according to general reductive amination procedure.

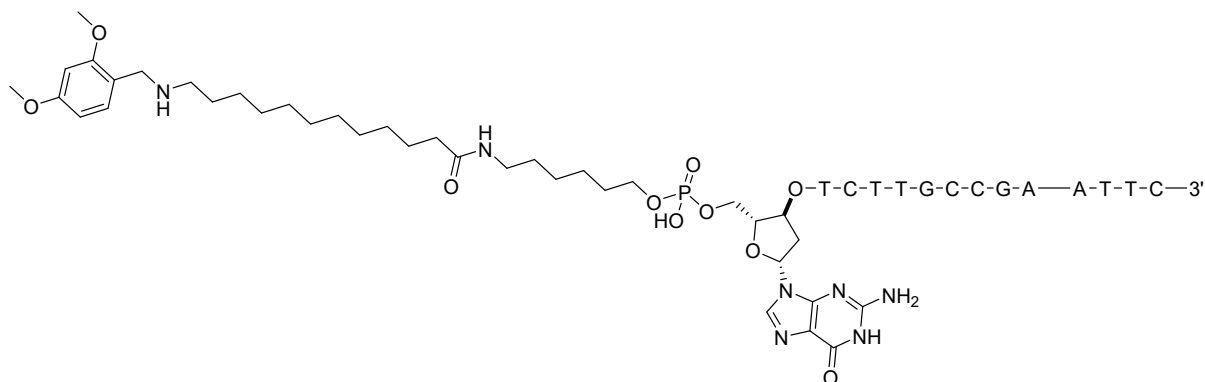

Figure S85: Mass spectrum of product 4 synthesised from HP2 and aldehyde 3 with TPGS-750-M as the surfactant analysed by DNA mass spectrometry gradient B.

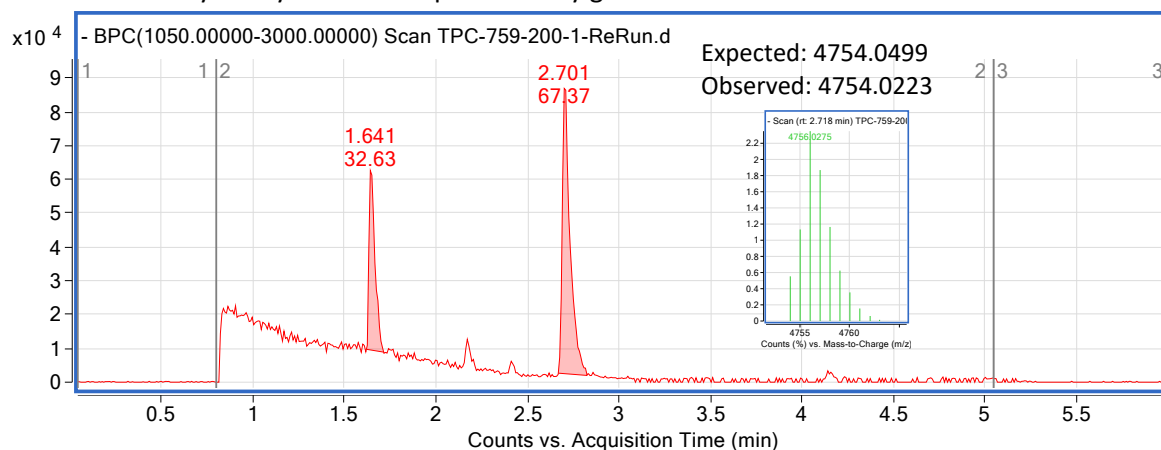

Figure S86: Mass spectrum of product 4 synthesised from HP2 and aldehyde 3 with PEG<sub>5</sub>C<sub>12</sub> as the surfactant analysed by DNA mass spectrometry gradient B.

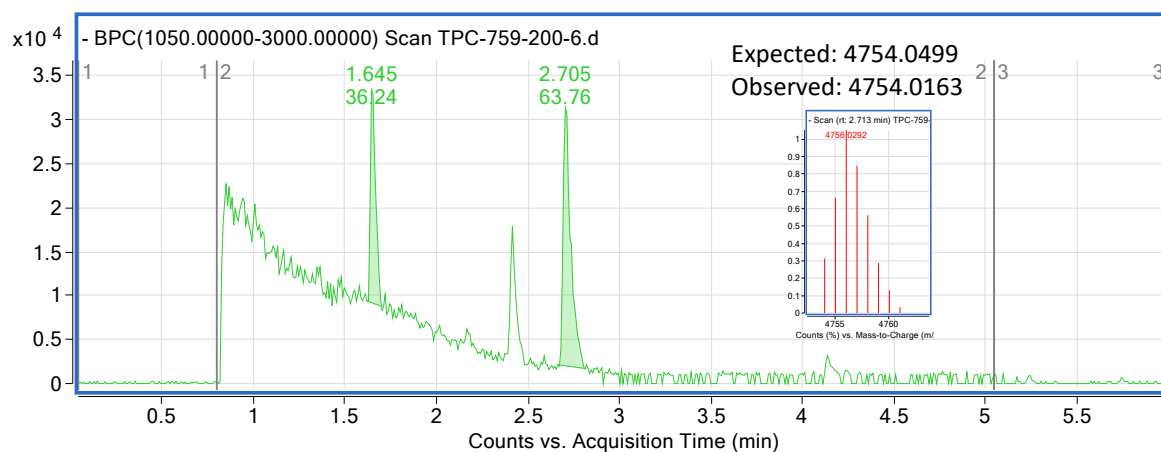

Figure S87: Mass spectrum of product 4 synthesised from HP2 and aldehyde 3 with Tween 65 as the surfactant analysed by DNA mass spectrometry gradient B.

Expected: 4754.0499  
Observed: 4754.0180

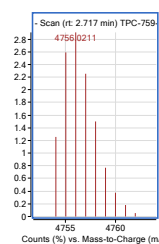

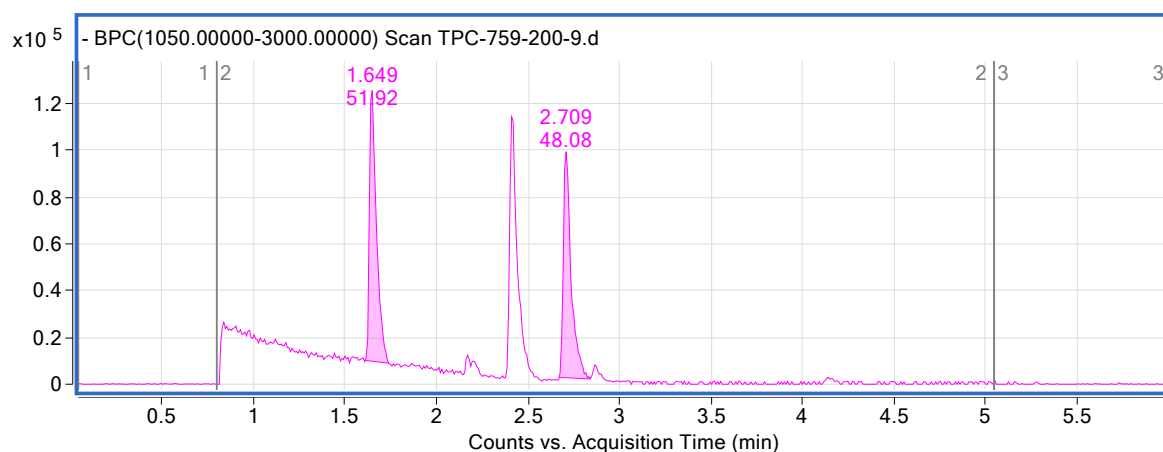

Figure S88: Mass spectrum of product 4 synthesised from HP2 and aldehyde 3 with Brij 700 as the surfactant analysed by DNA mass spectrometry gradient B.

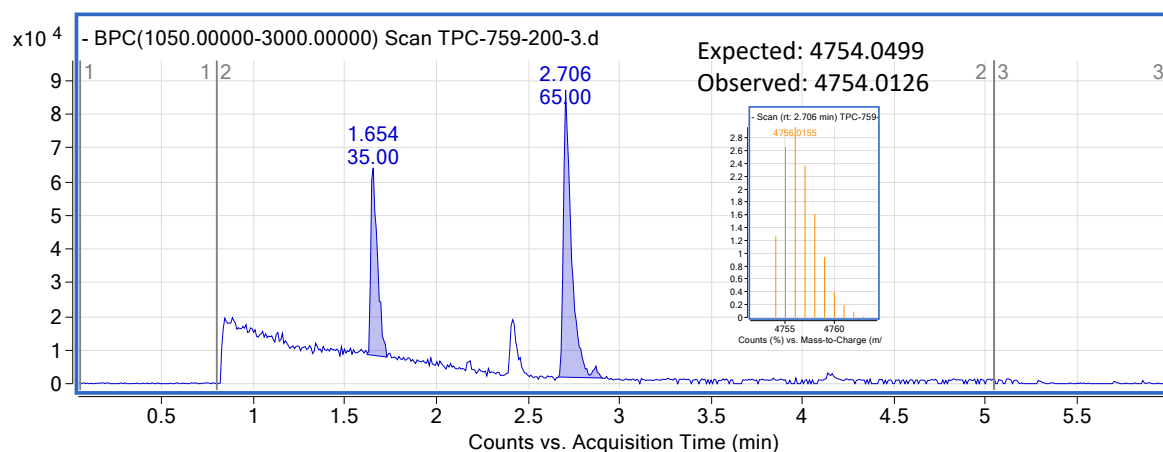

Figure S89: Mass spectrum of product 4 synthesised from HP2 and aldehyde 3 with Brij S20 as the surfactant analysed by DNA mass spectrometry gradient B.

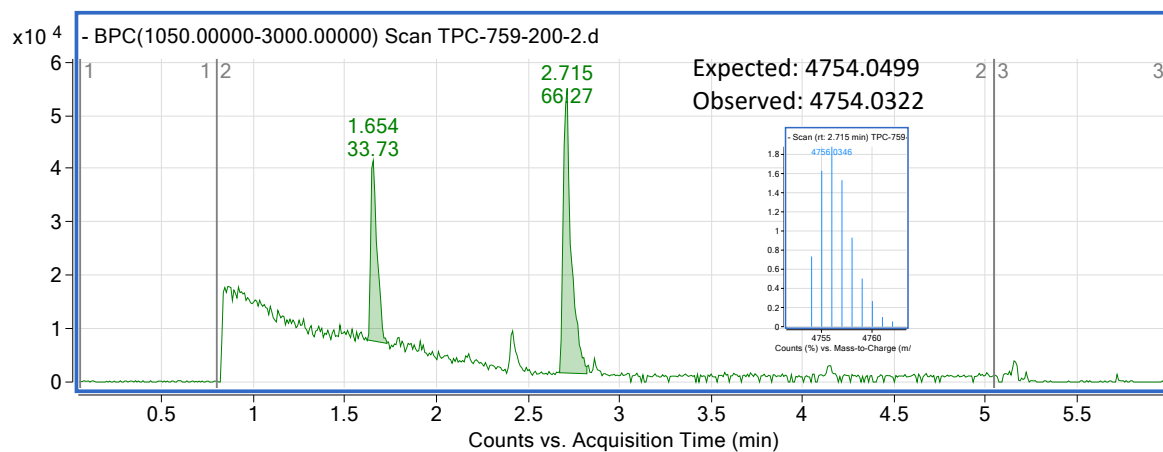



Figure S90: Mass spectrum of product 4 synthesised from HP2 and aldehyde 3 with Triton-X-405 as the surfactant analysed by DNA mass spectrometry gradient B.

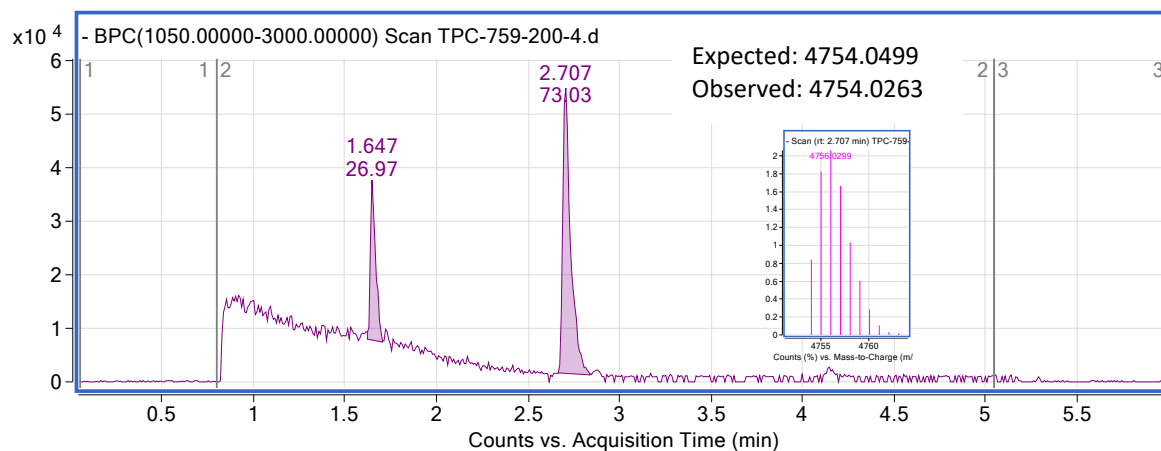

Figure S91: Mass spectrum of product 4 synthesised from HP2 and aldehyde 3 with TTAC as the surfactant analysed by DNA mass spectrometry gradient B.

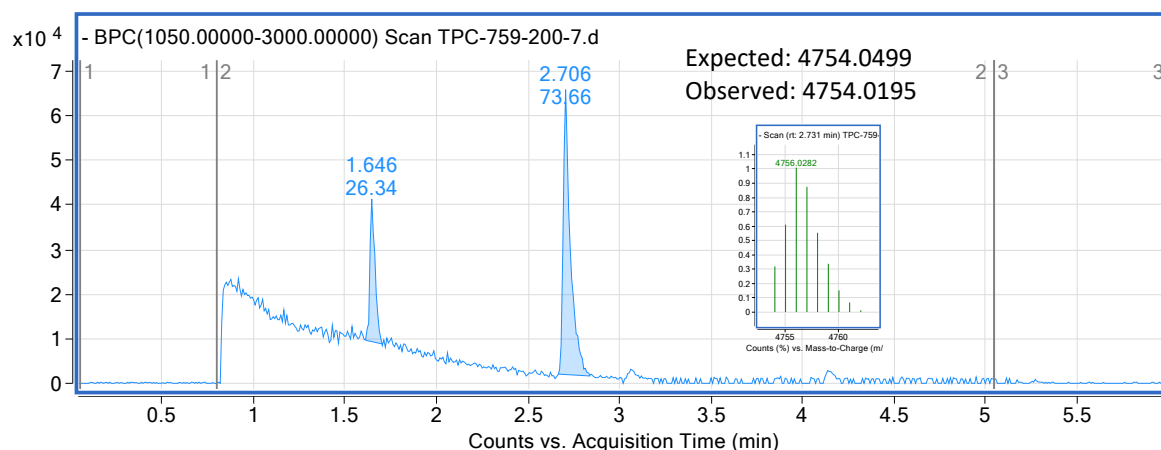

Figure S92: Mass spectrum of product 4 synthesised from HP2 and aldehyde 3 with sulfobetaine-16 as the surfactant analysed by DNA mass spectrometry gradient B.

Expected: 4754.0499  
Observed: 4754.0073

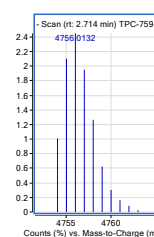

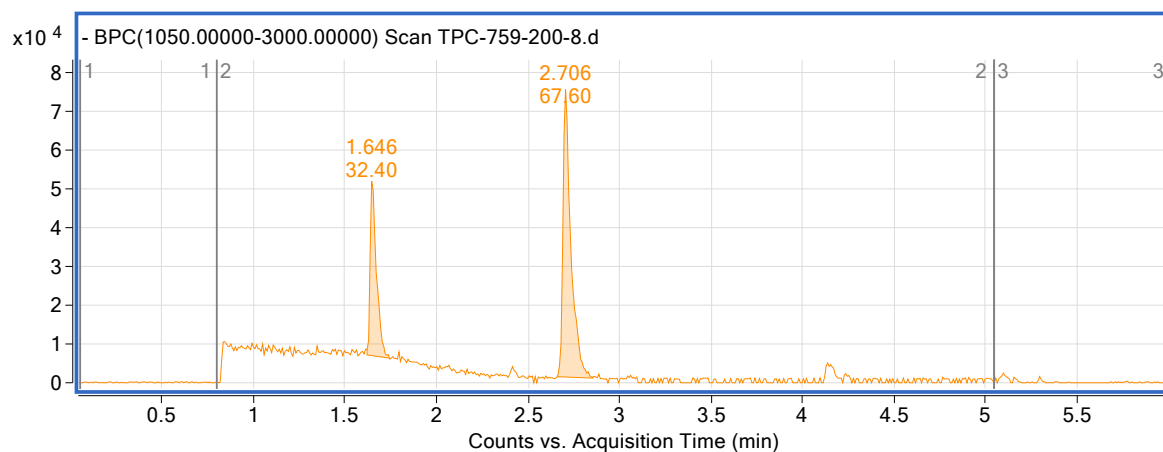

Table 6 Chromatograms

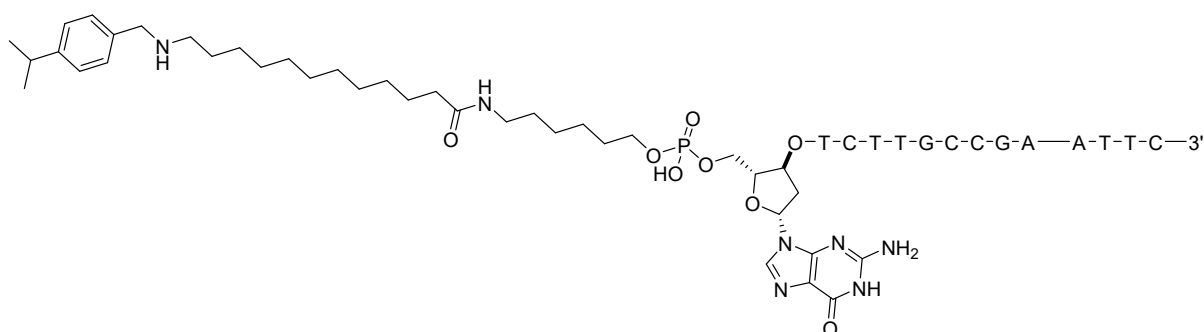

Figure S93: Mass spectrum of DNA-tagged product of reductive amination of HP2 and 4-isopropylbenzaldehyde using TPGS-750-M as the surfactant analysed by DNA mass spectrometry gradient C.

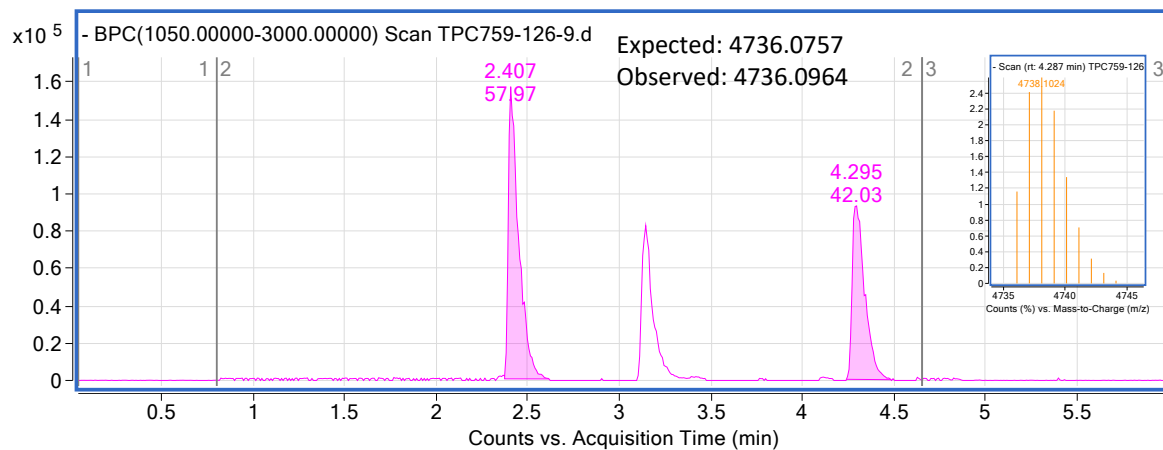

Figure S94: Mass spectrum of DNA-tagged product of reductive amination of HP2 and 4-isopropylbenzaldehyde using Triton-X-405 as the surfactant analysed by DNA mass spectrometry gradient A.

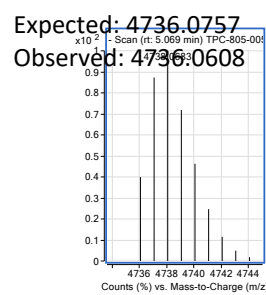

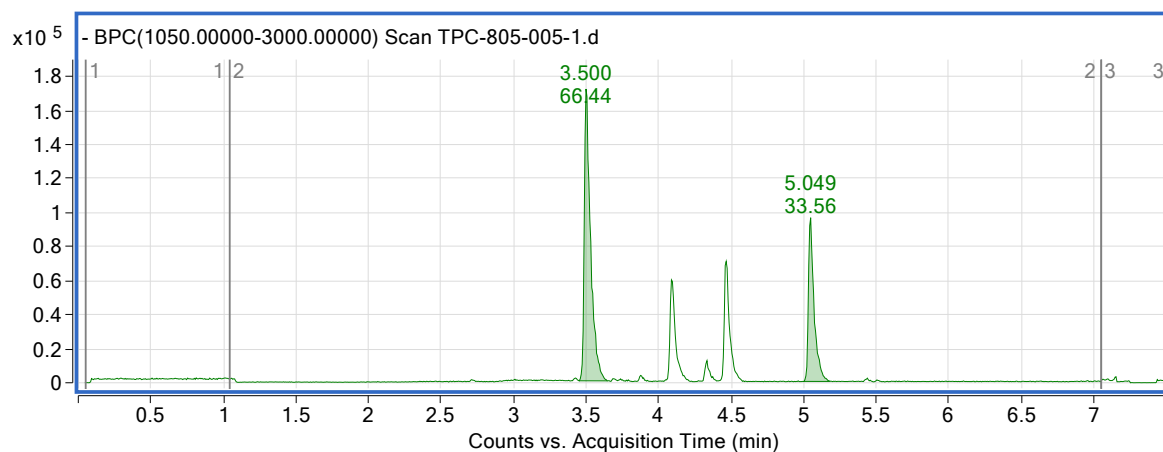

Figure S95: Mass spectrum of DNA-tagged product of reductive amination of HP2 and 4-isopropylbenzaldehyde using TTAC as the surfactant analysed by DNA mass spectrometry gradient A.

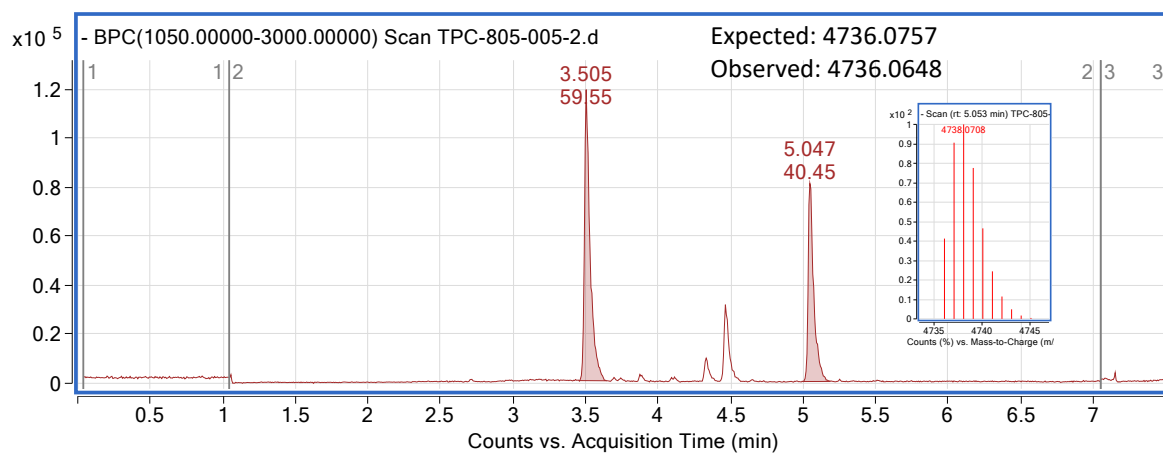

Figure S96: Mass spectrum of DNA-tagged product of reductive amination of HP2 and 4-isopropylbenzaldehyde using sulfobetaine-16 as the surfactant analysed by DNA mass spectrometry gradient A.

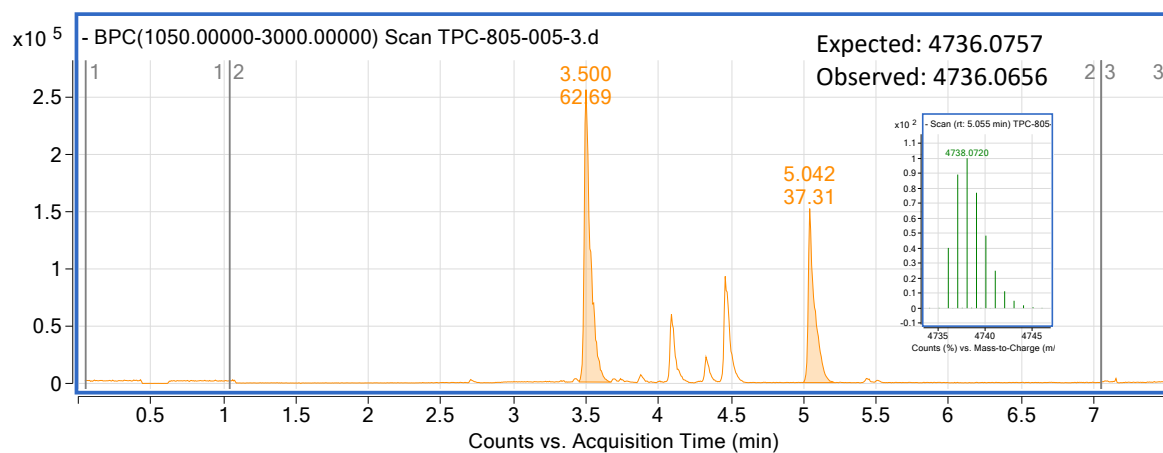

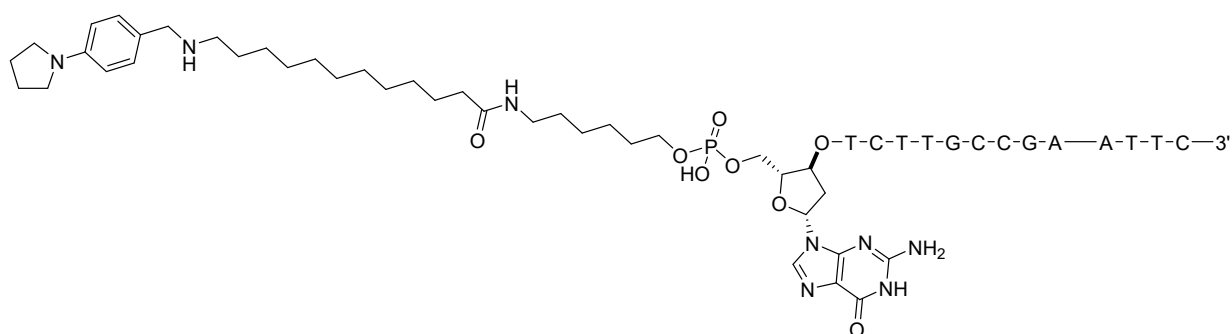

Figure S97: Mass spectrum of DNA-tagged product of reductive amination of HP2 and 4-(pyrrolidin-1-yl)benzaldehyde using TPGS-750-M as the surfactant analysed by DNA mass spectrometry gradient D.

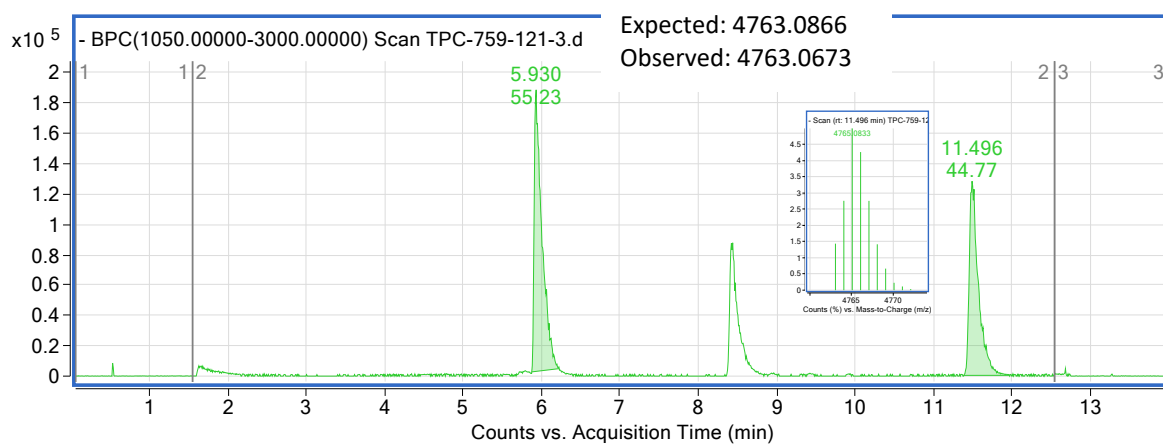

Figure S98: Mass spectrum of DNA-tagged product of reductive amination of HP2 and 4-(pyrrolidin-1-yl)benzaldehyde using Triton-X-405 as the surfactant analysed by DNA mass spectrometry gradient A.

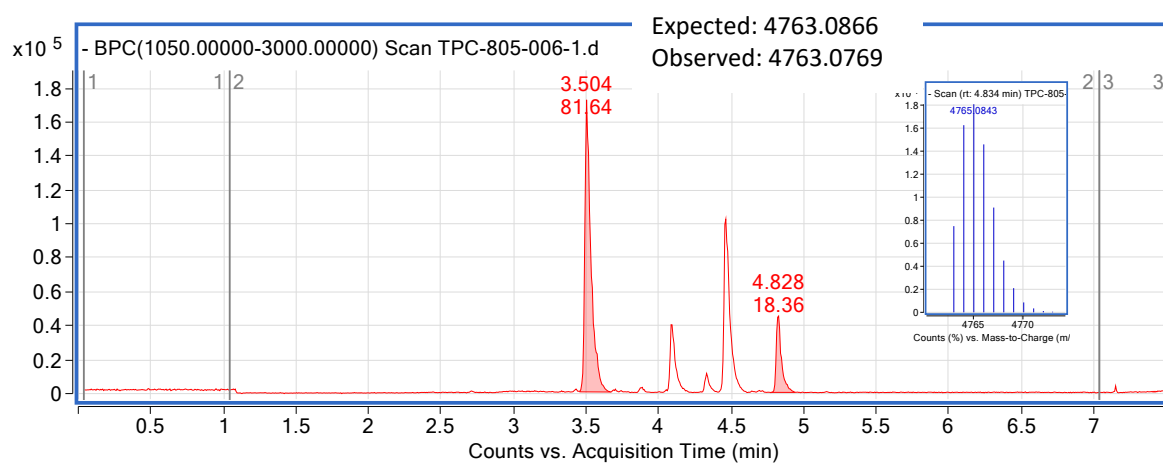

Figure S99: Mass spectrum of DNA-tagged product of reductive amination of HP2 and 4-(pyrrolidin-1-yl)benzaldehyde using TTAC as the surfactant analysed by DNA mass spectrometry gradient A.

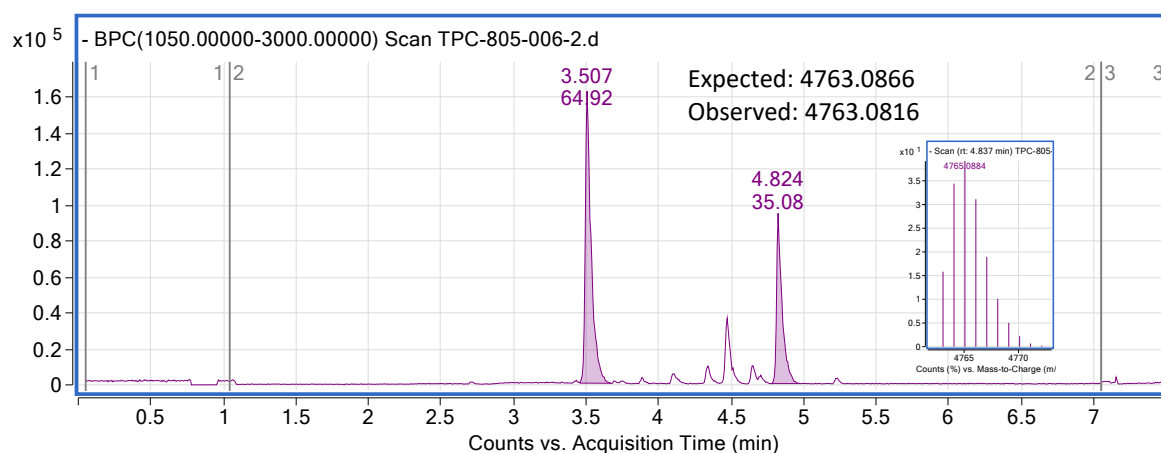

Figure S100: Mass spectrum of DNA-tagged product of reductive amination of HP2 and 4-(pyrrolidin-1-yl)benzaldehyde using sulfobetaine-16 as the surfactant analysed by DNA mass spectrometry gradient A.

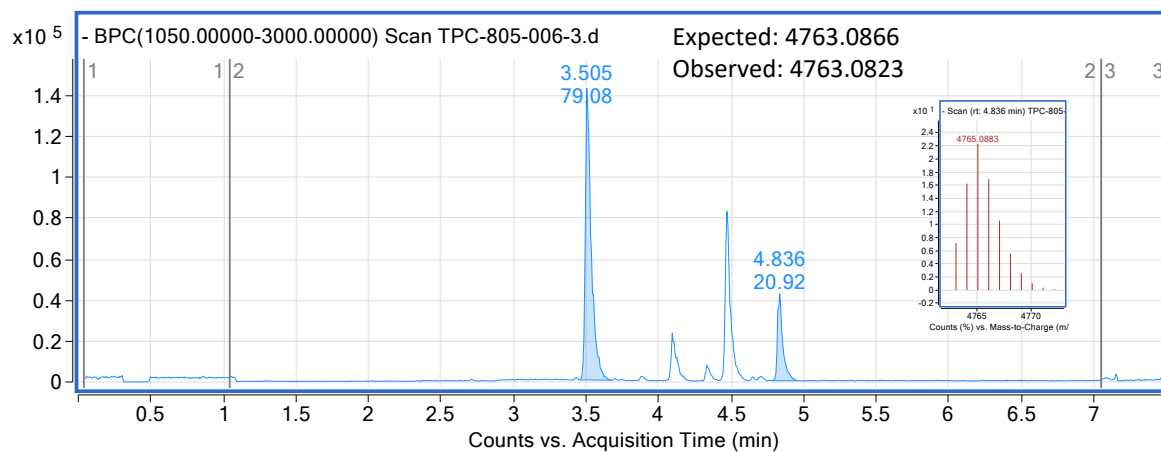

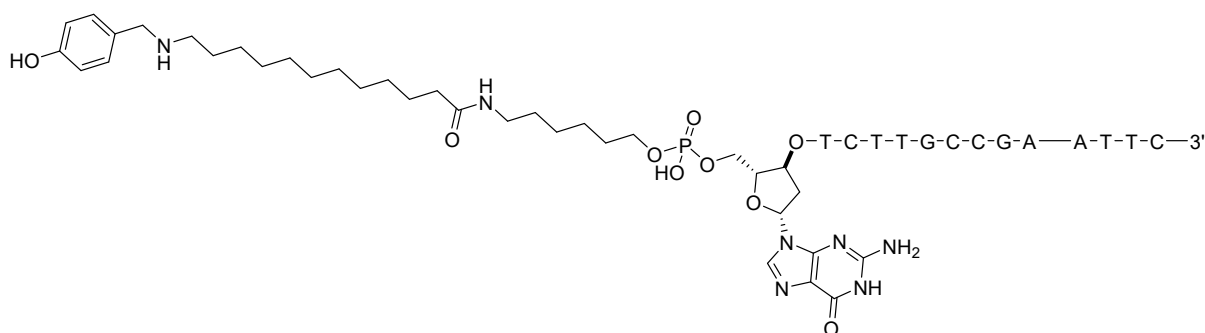

Figure S101: Mass spectrum of DNA-tagged product of reductive amination of HP2 and 4-hydroxybenzaldehyde using TPGS-750-M as the surfactant analysed by DNA mass spectrometry gradient C.

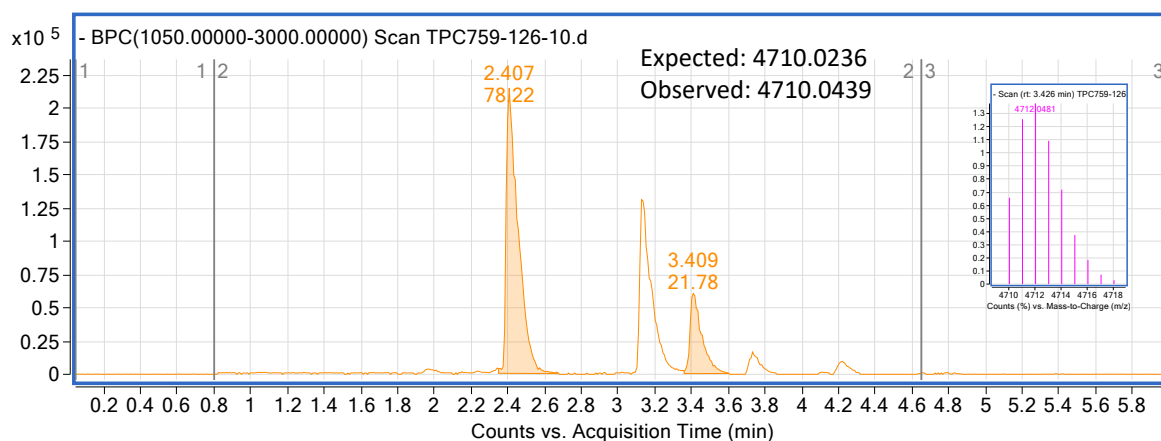

Figure S102: Mass spectrum of DNA-tagged product of reductive amination of HP2 and 4-hydroxybenzaldehyde using Triton-X-405 as the surfactant analysed by DNA mass spectrometry gradient A.

Expected: 4710.0236

Observed: 4710.0043

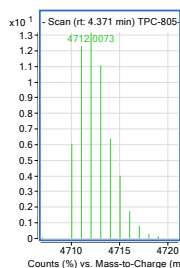

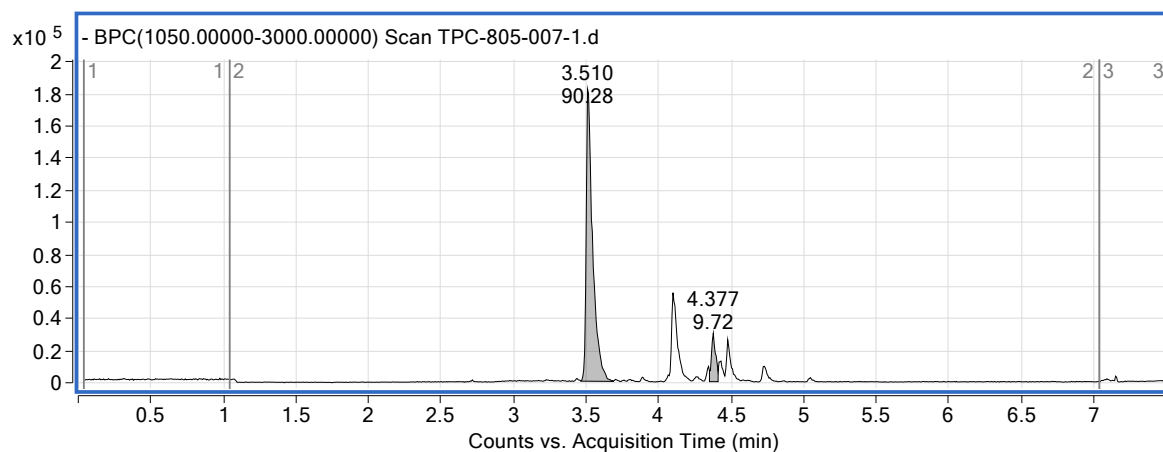

Figure S103: Mass spectrum of DNA-tagged product of reductive amination of HP2 and 4-hydroxybenzaldehyde using TTAC as the surfactant analysed by DNA mass spectrometry gradient A.

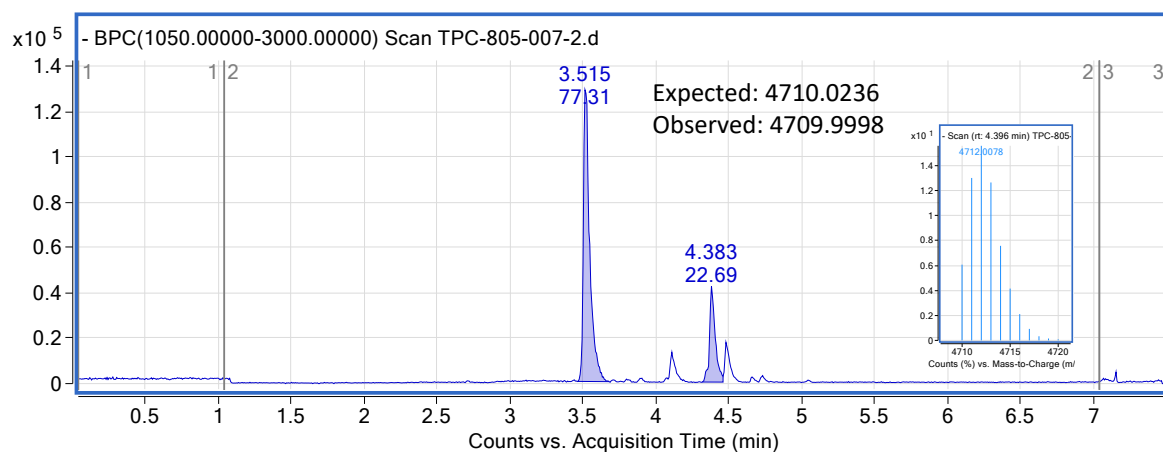

Figure S104: Mass spectrum of DNA-tagged product of reductive amination of HP2 and 4-hydroxybenzaldehyde using sulfobetaine-16 as the surfactant analysed by DNA mass spectrometry gradient A.

Expected: 4710.0236  
Observed: 4710.0000

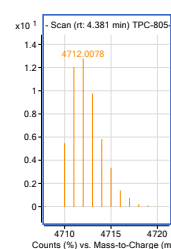

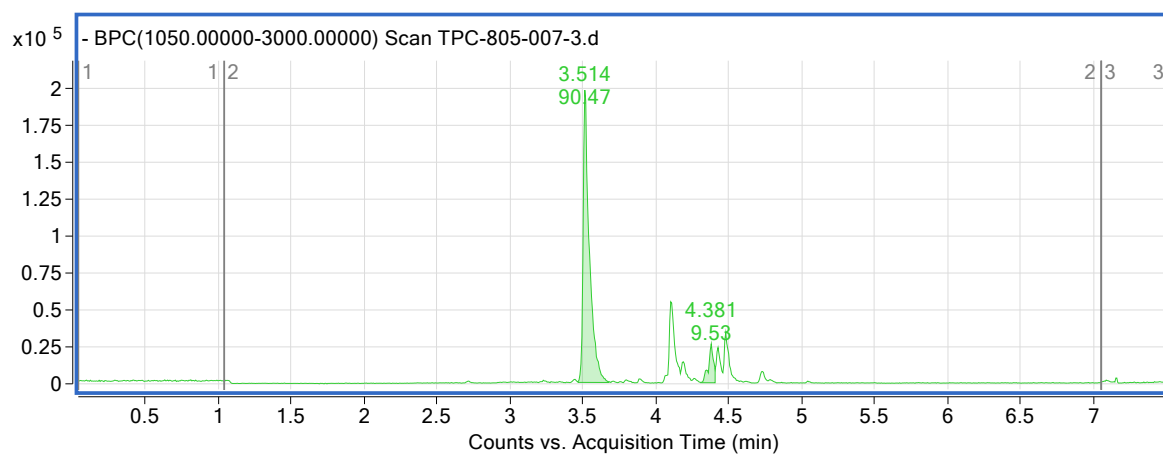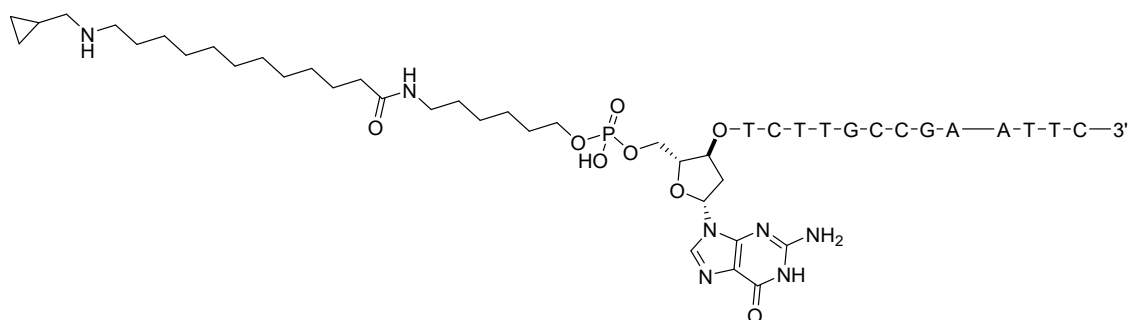

Figure S105: Mass spectrum of DNA-tagged product of reductive amination of HP2 and cyclopropanecarbaldehyde using TPGS-750-M as the surfactant analysed by DNA mass spectrometry gradient C.

Expected: 4658.0287  
Observed: 4658.0315

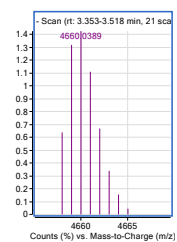



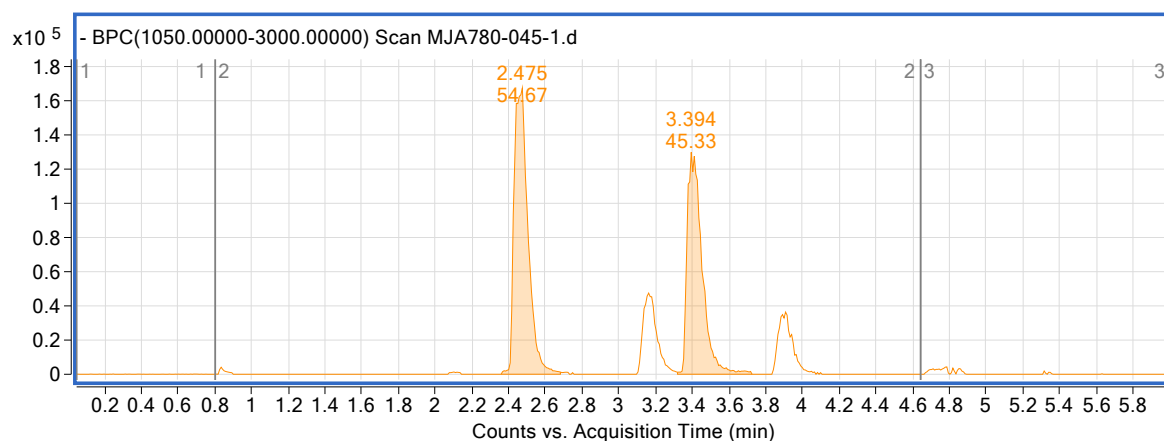

Figure S106: Mass spectrum of DNA-tagged product of reductive amination of HP2 and cyclopropanecarbaldehyde using Triton-X-405 as the surfactant analysed by DNA mass spectrometry gradient A.

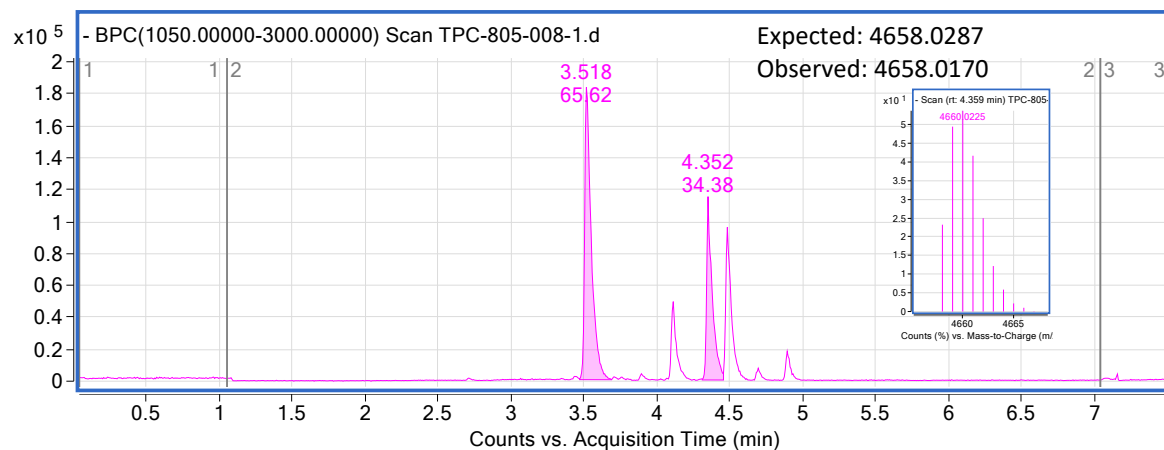

Figure S107: Mass spectrum of DNA-tagged product of reductive amination of HP2 and cyclopropanecarbaldehyde using TTAC as the surfactant analysed by DNA mass spectrometry gradient A.

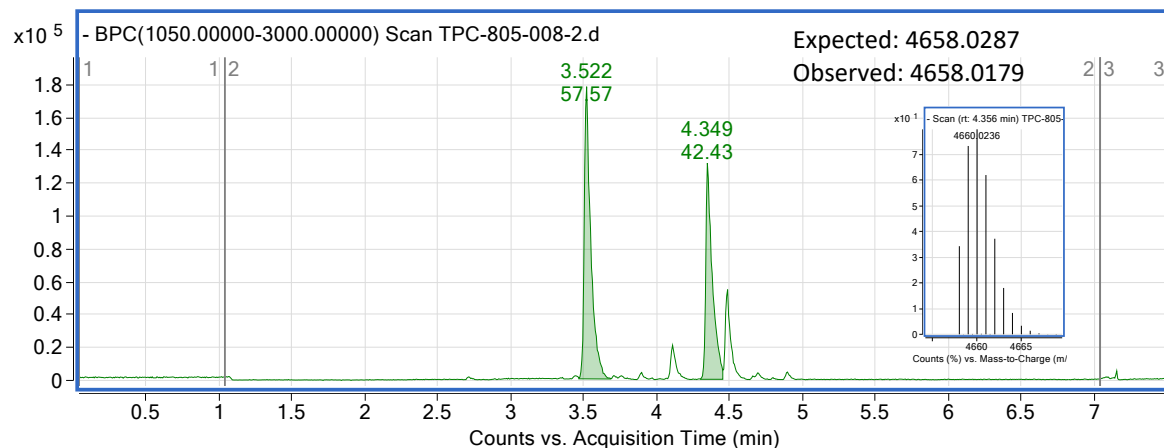

Figure S108: Mass spectrum of DNA-tagged product of reductive amination of HP2 and cyclopropanecarbaldehyde using Sulfobetaine-16 as the surfactant analysed by DNA mass spectrometry gradient A.

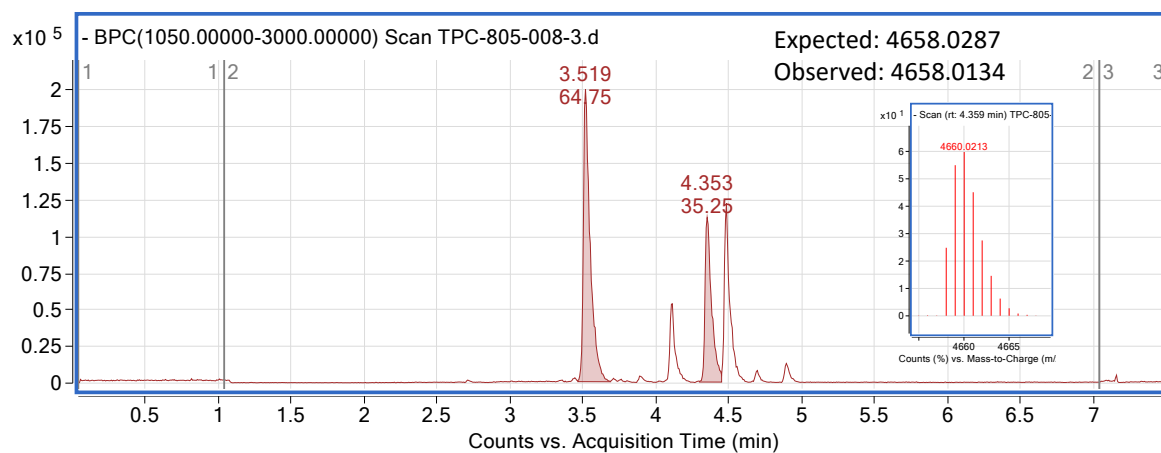

Table 7 Chromatograms

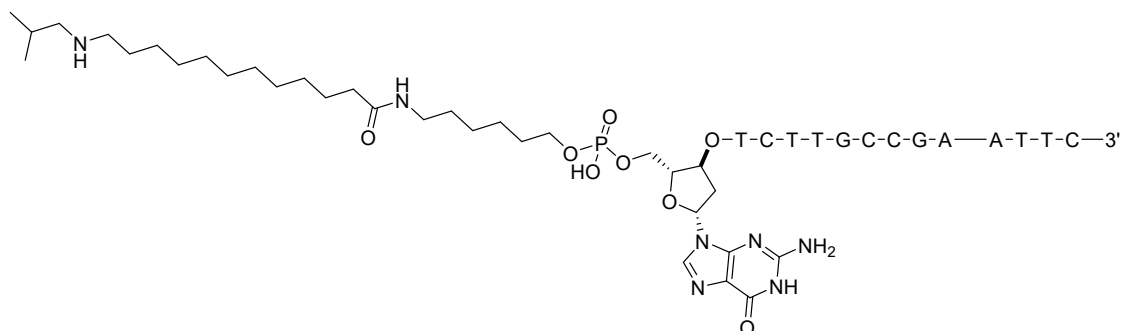

Figure S109: Mass spectrum of DNA-tagged product of reductive amination of HP2 and isobutyraldehyde using TPGS-750-M as the surfactant analysed by DNA mass spectrometry gradient A.

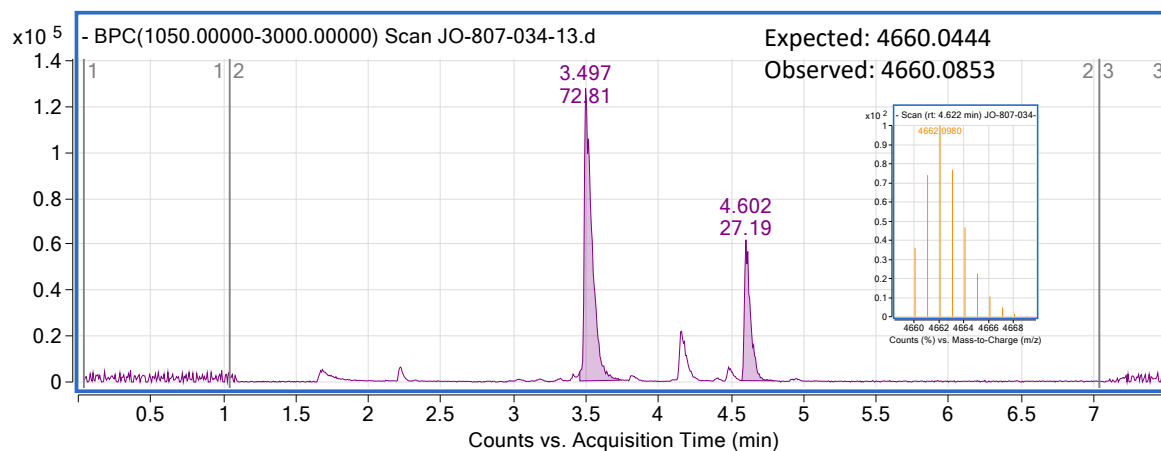

Figure S110: Mass spectrum of DNA-tagged product of reductive amination of HP2 and isobutyraldehyde using TTAC as the surfactant analysed by DNA mass spectrometry gradient A.

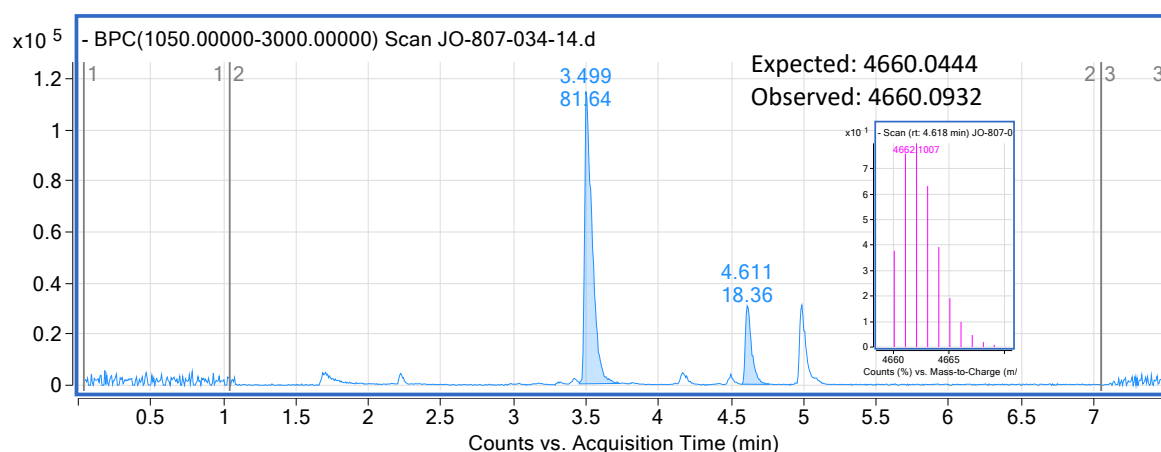

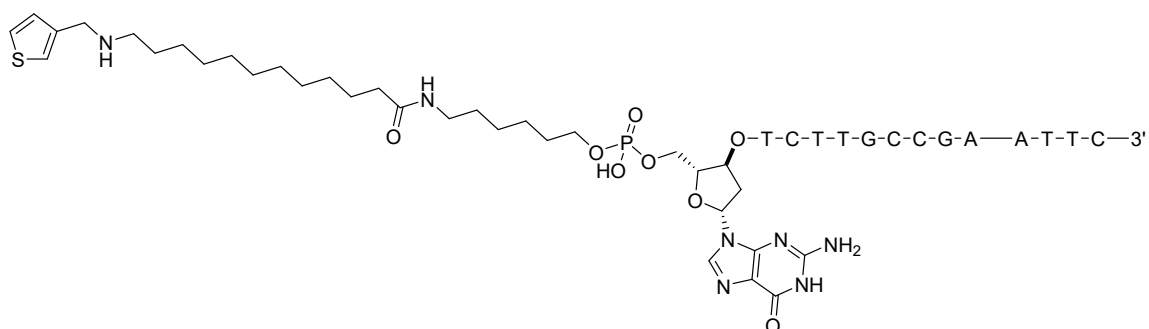

Figure S111: Mass spectrum of DNA-tagged product of reductive amination of HP2 and thiophene-3-carbaldehyde using TPGS-750-M as the surfactant analysed by DNA mass spectrometry gradient A.

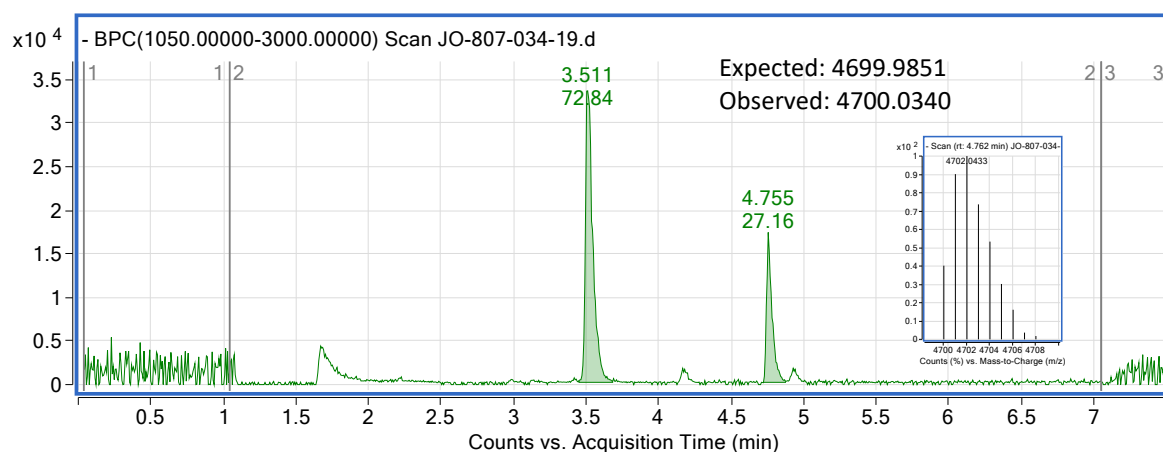

Figure S112: Mass spectrum of DNA-tagged product of reductive amination of HP2 and thiophene-3-carbaldehyde using TTAC as the surfactant analysed by DNA mass spectrometry gradient A.

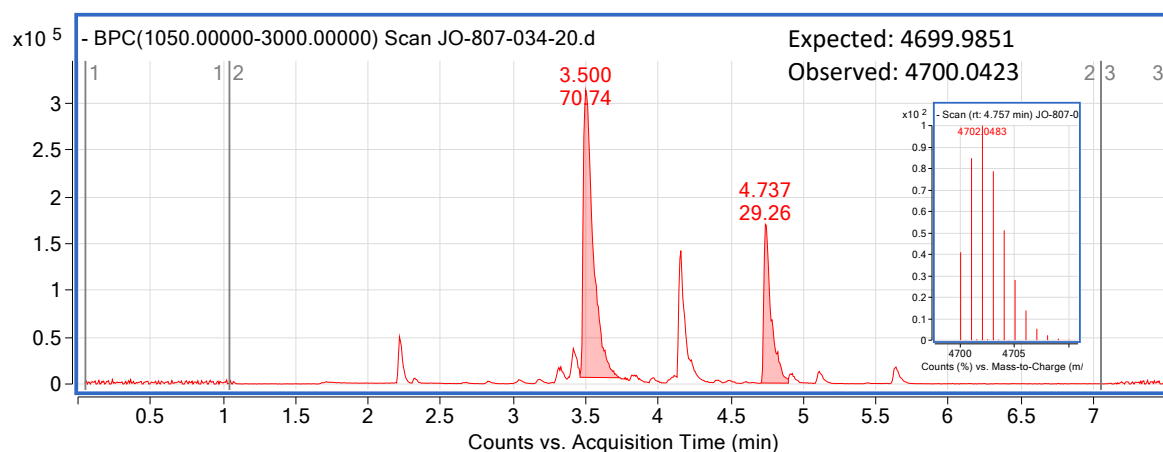

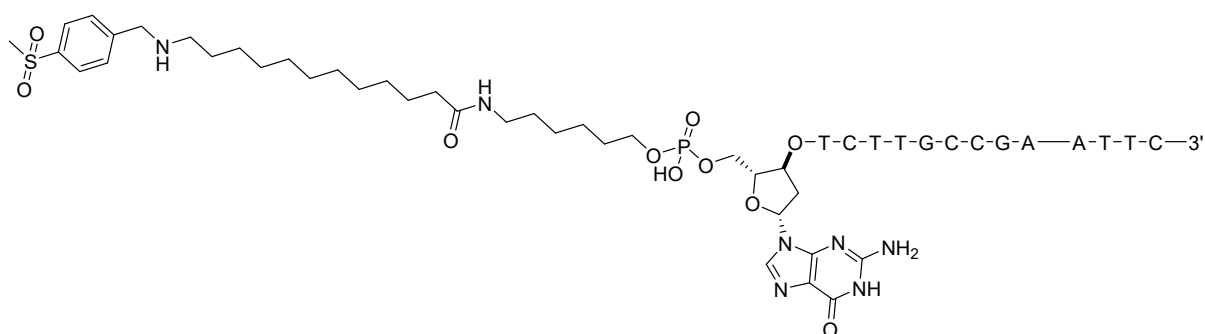

Figure S113: Mass spectrum of DNA-tagged product of reductive amination of HP2 and 4-(methylsulfonyl)benzaldehyde using TPGS-750-M as the surfactant analysed by DNA mass spectrometry gradient A.

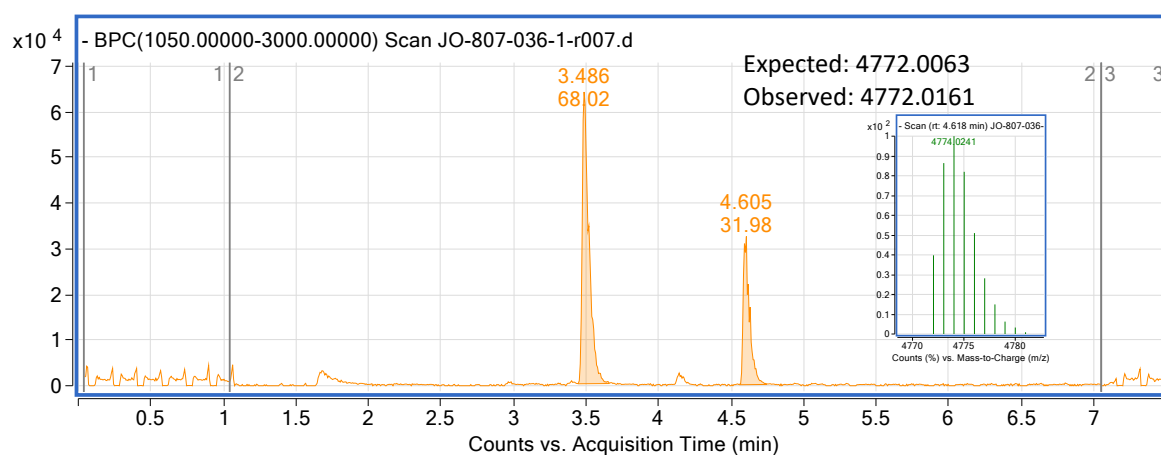

Figure S114: Mass spectrum of DNA-tagged product of reductive amination of HP2 and 4-(methylsulfonyl)benzaldehyde using TTAC as the surfactant analysed by DNA mass spectrometry gradient A.

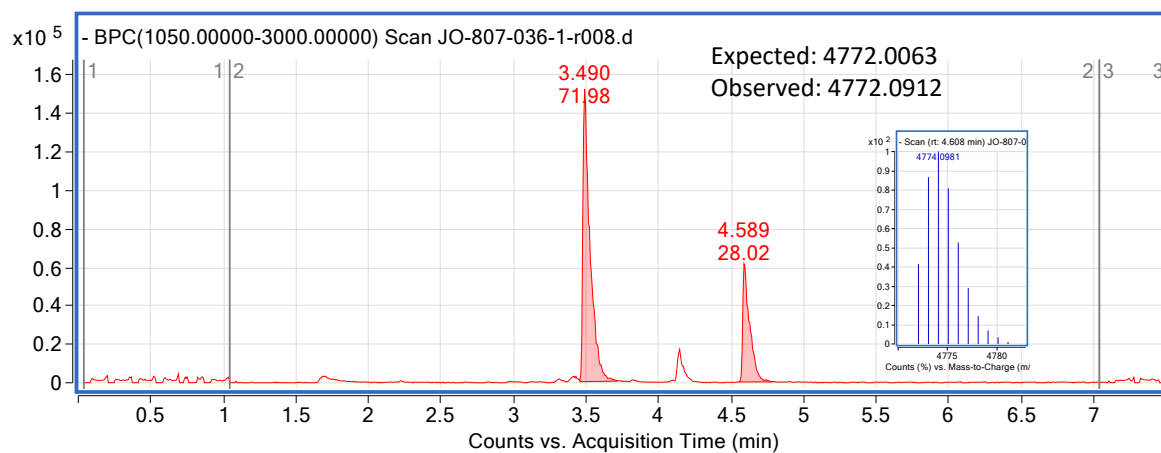

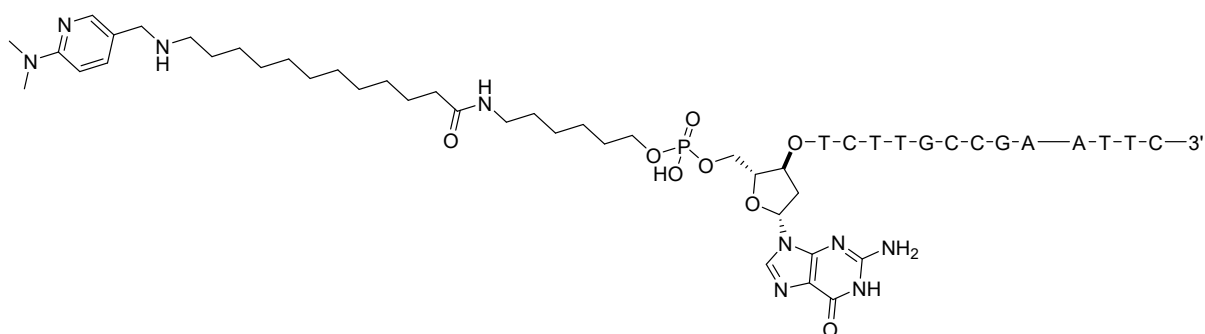

Figure S115: Mass spectrum of DNA-tagged product of reductive amination of HP2 and 6-(dimethylamino)nicotinaldehyde using TPGS-750-M as the surfactant analysed by DNA mass spectrometry gradient A.

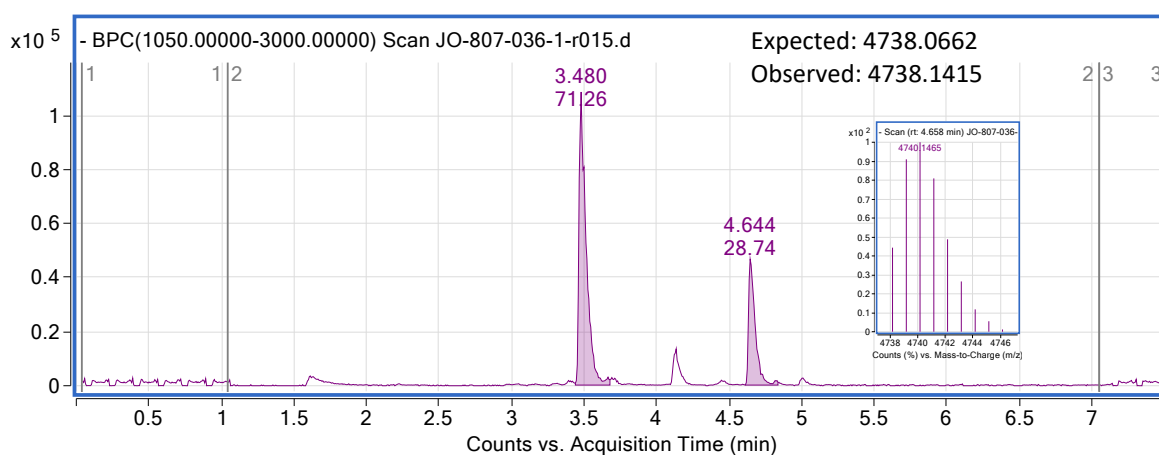

Figure S116: Mass spectrum of DNA-tagged product of reductive amination of HP2 and 6-(dimethylamino)nicotinaldehyde using TTAC as the surfactant analysed by DNA mass spectrometry gradient A.

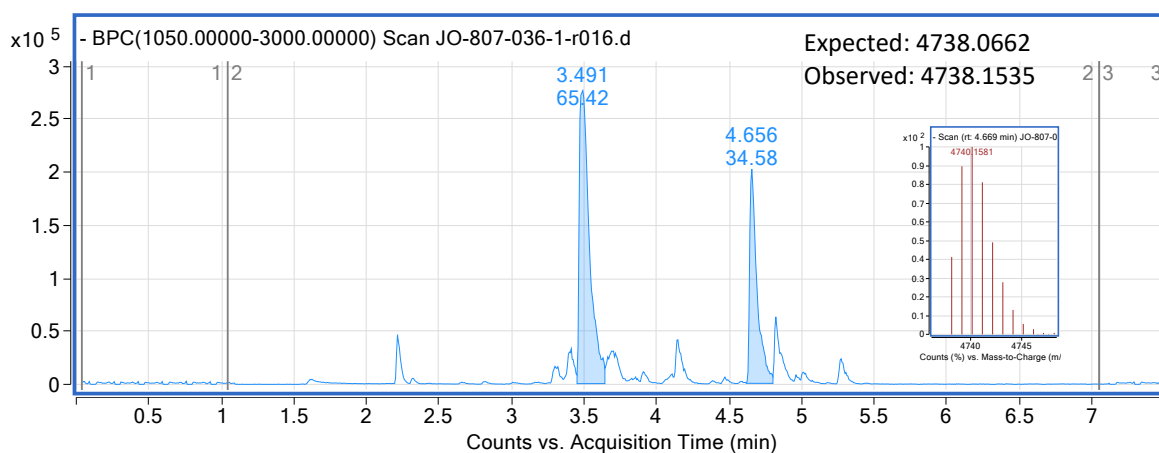

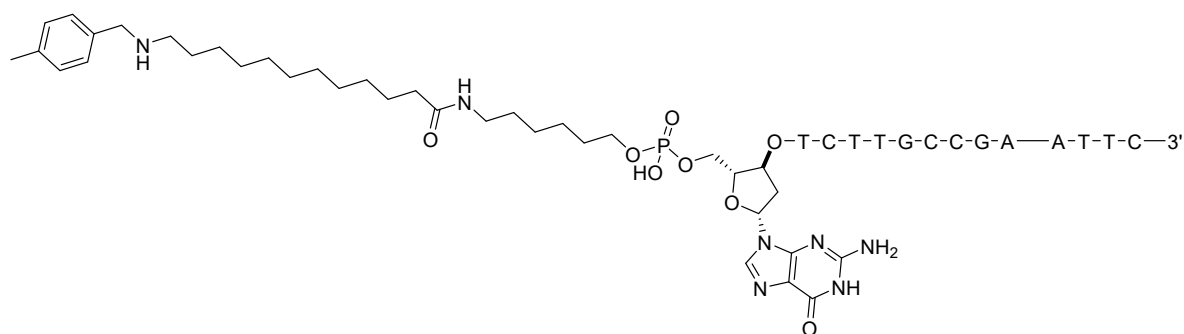

Figure S117: Mass spectrum of DNA-tagged product of reductive amination of HP2 and 4-methylbenzaldehyde using TPGS-750-M as the surfactant analysed by DNA mass spectrometry gradient A.

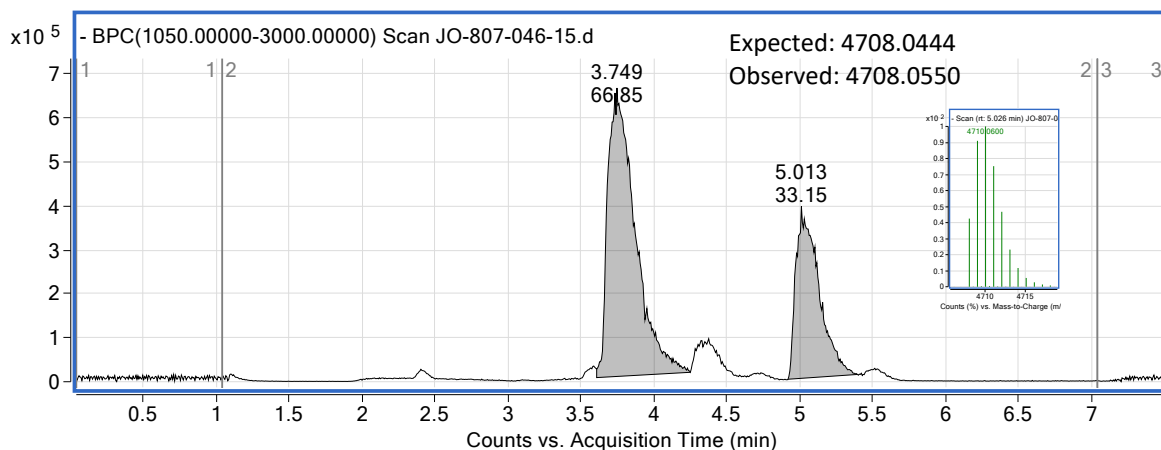

Figure S118: Mass spectrum of DNA-tagged product of reductive amination of HP2 and 4-methylbenzaldehyde using TTAC as the surfactant analysed by DNA mass spectrometry gradient A.

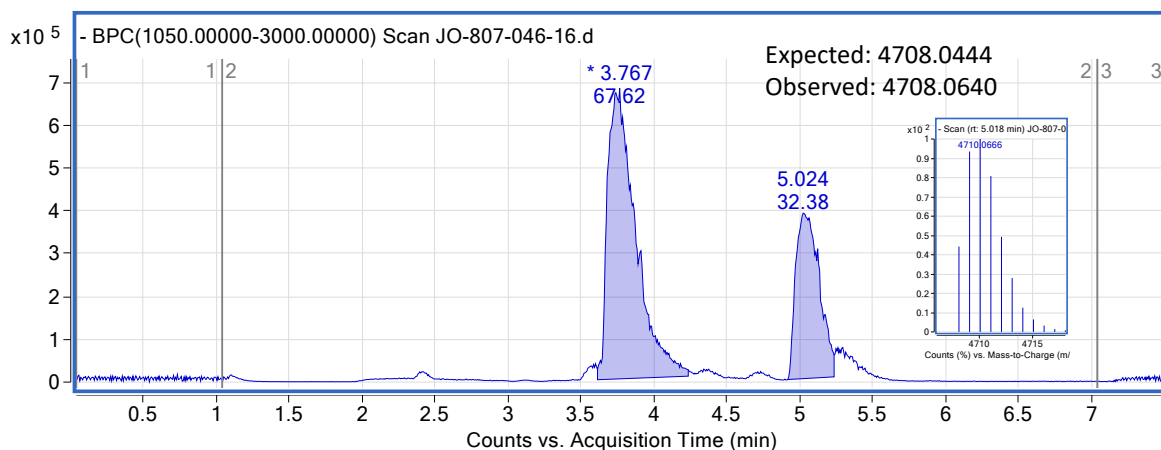

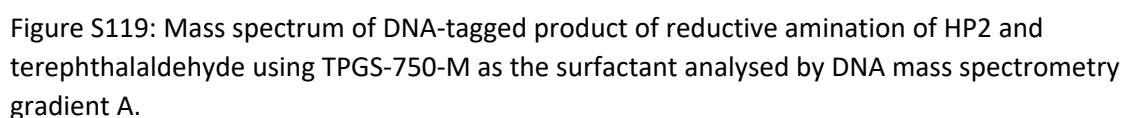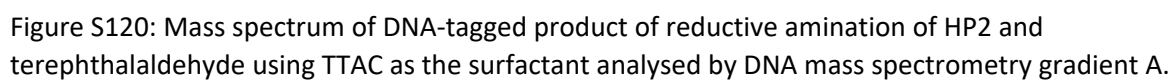



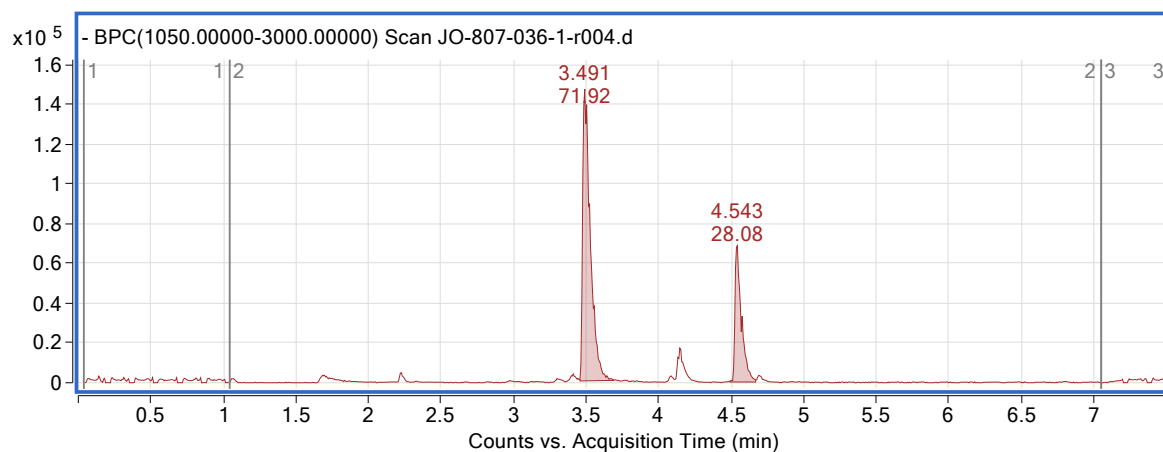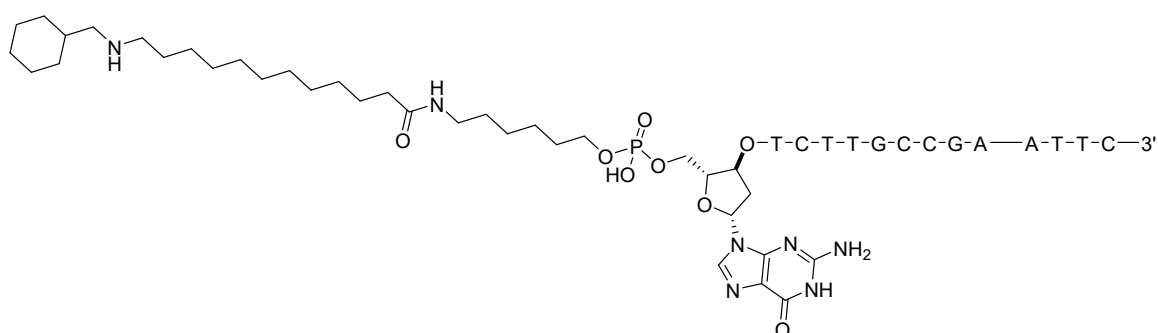

Figure S121: Mass spectrum of DNA-tagged product of reductive amination of HP2 and cyclohexanecarbaldehyde using TPGS-750-M as the surfactant analysed by DNA mass spectrometry gradient A.

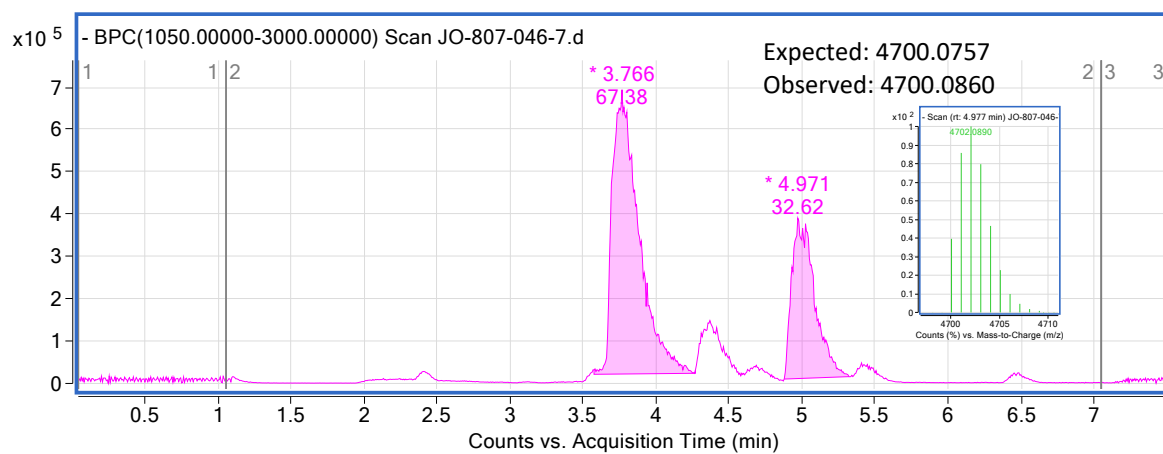

Figure S122: Mass spectrum of DNA-tagged product of reductive amination of HP2 and cyclohexanecarbaldehyde using TTAC as the surfactant analysed by DNA mass spectrometry gradient A.

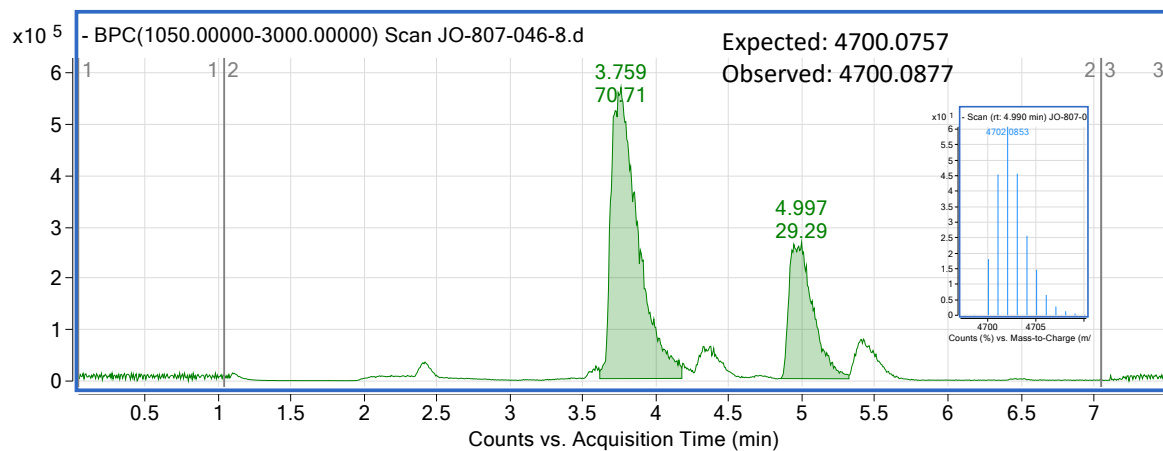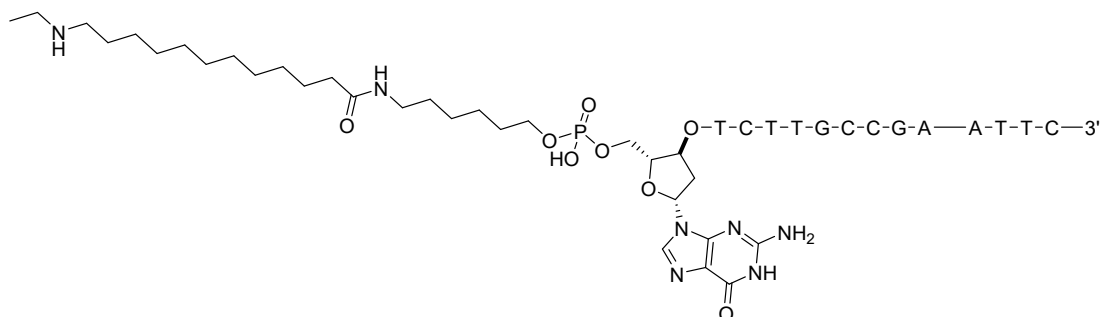

Figure S123: Mass spectrum of DNA-tagged product of reductive amination of HP2 and acetaldehyde using TPGS-750-M as the surfactant analysed by DNA mass spectrometry gradient A.

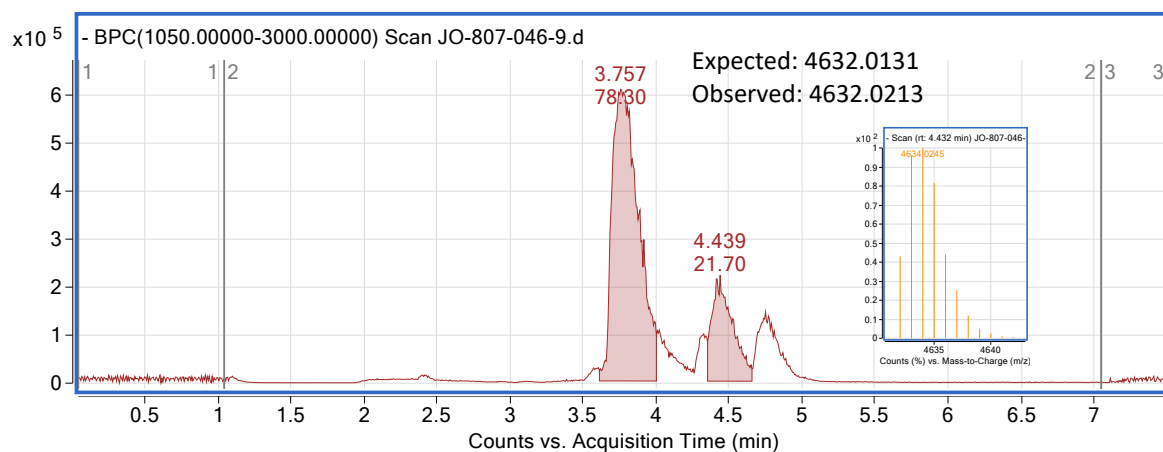

Figure S124: Mass spectrum of DNA-tagged product of reductive amination of HP2 and acetaldehyde using TTAC as the surfactant analysed by DNA mass spectrometry gradient A.

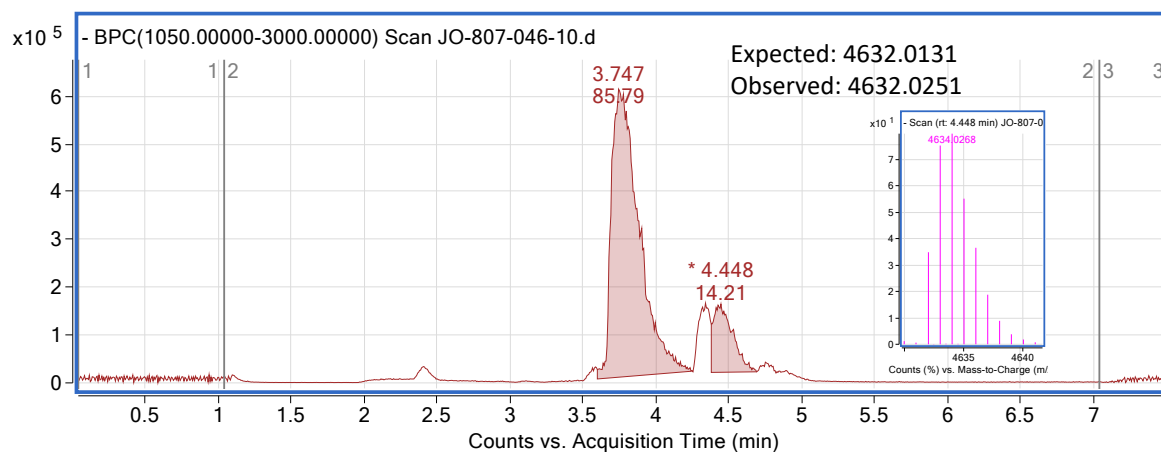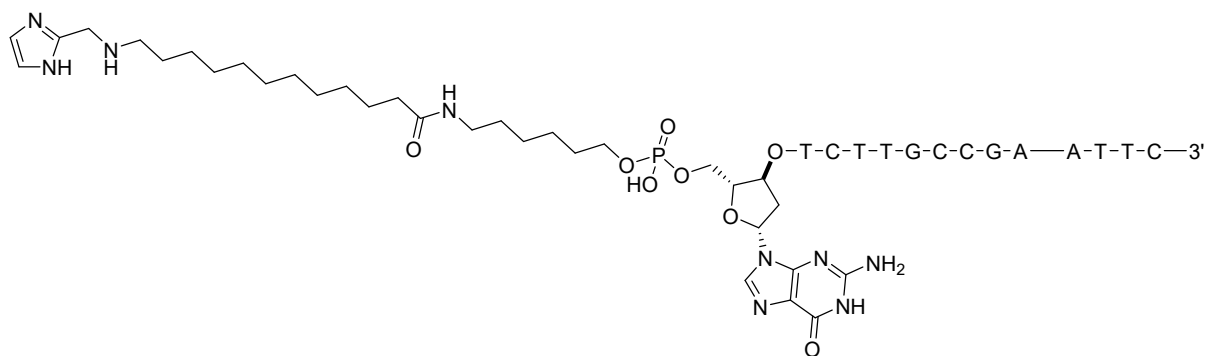

Figure S125: Mass spectrum of DNA-tagged product of reductive amination of HP2 and 1*H*-pyrrole-2-carbaldehyde using TPGS-750-M as the surfactant analysed by DNA mass spectrometry gradient A.

Expected: 4684.0192  
Observed: 4684.0877

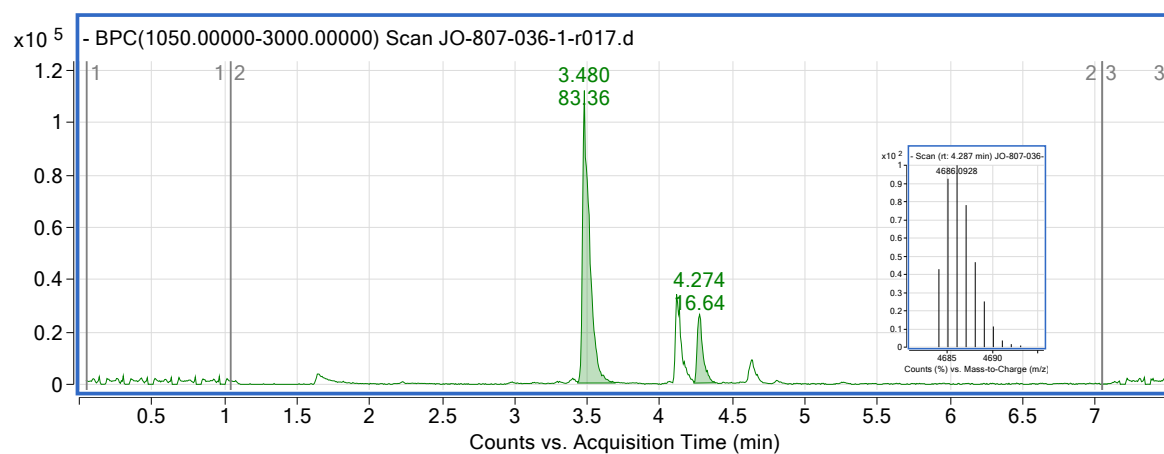

Figure S126: Mass spectrum of DNA-tagged product of reductive amination of HP2 and 1*H*-pyrrole-2-carbaldehyde using TTAC as the surfactant analysed by DNA mass spectrometry gradient A.

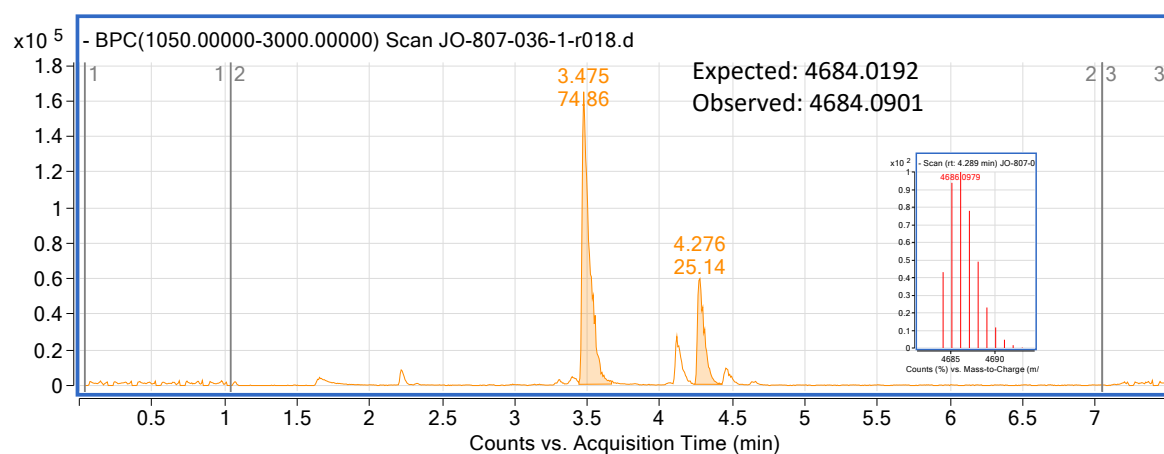

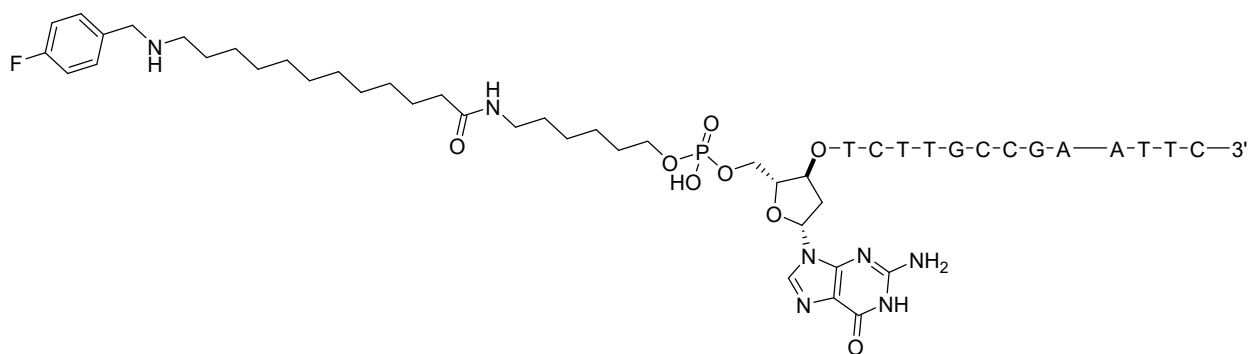

Figure S127: Mass spectrum of DNA-tagged product of reductive amination of HP2 and 4-fluorobenzaldehyde using TPGS-750-M as the surfactant analysed by DNA mass spectrometry gradient A.

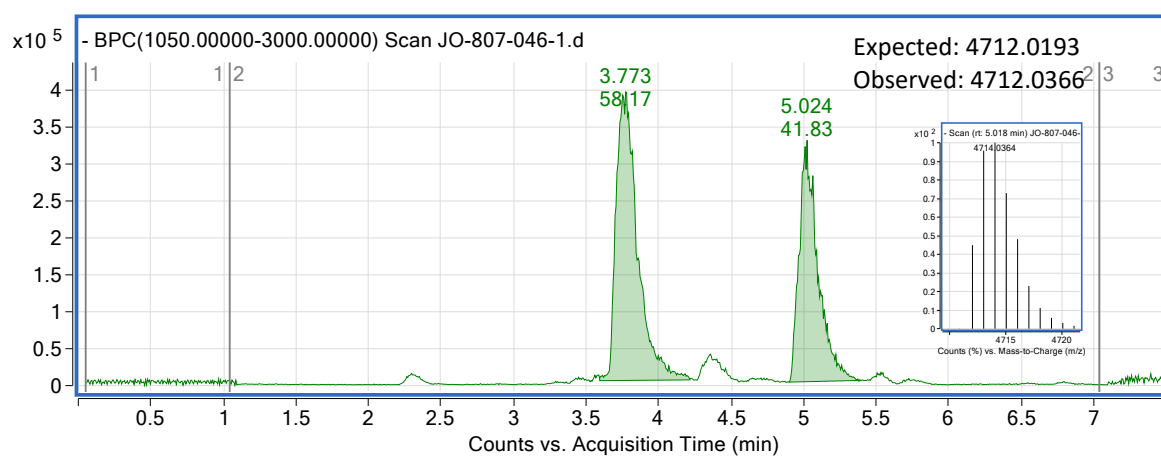

Figure S128: Mass spectrum of DNA-tagged product of reductive amination of HP2 and 4-fluorobenzaldehyde using TTAC as the surfactant analysed by DNA mass spectrometry gradient A.

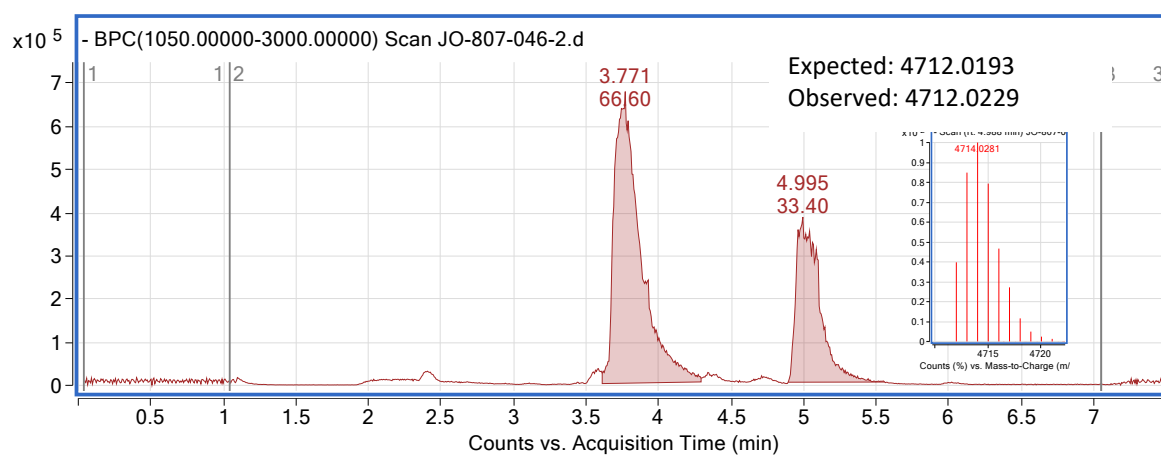

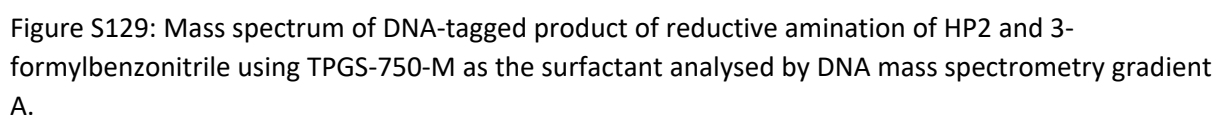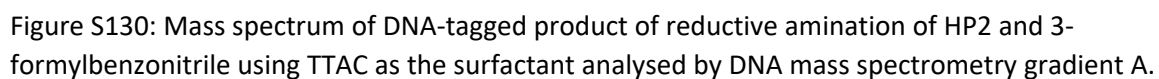

Observed: 4719.0286

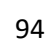

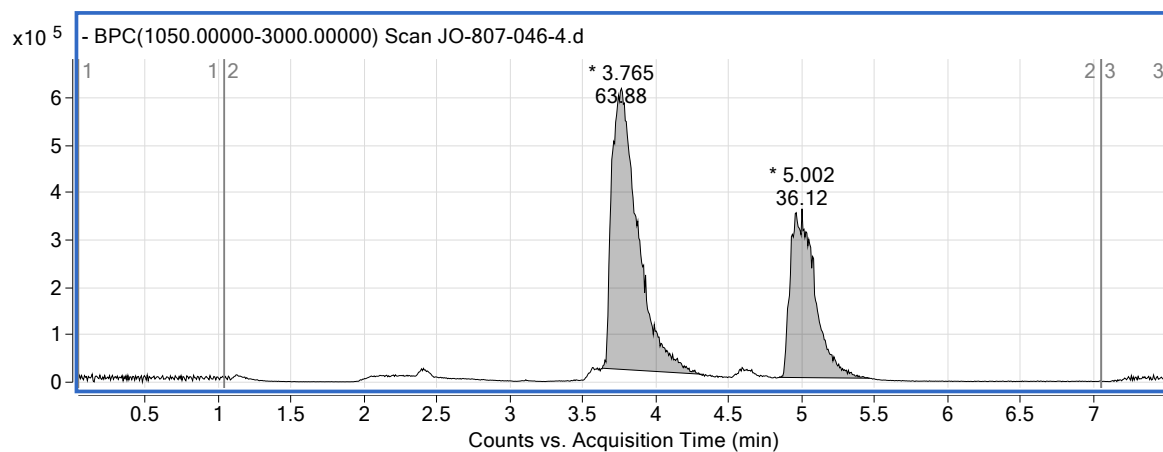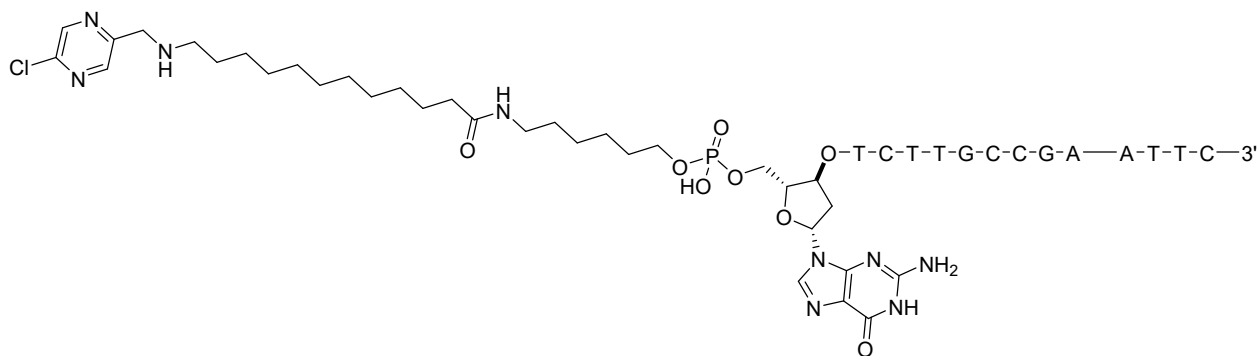

Figure S131: Mass spectrum of DNA-tagged product of reductive amination of HP2 and 5-chloropyrazine-2-carbaldehyde using TPGS-750-M as the surfactant analysed by DNA mass spectrometry gradient A.

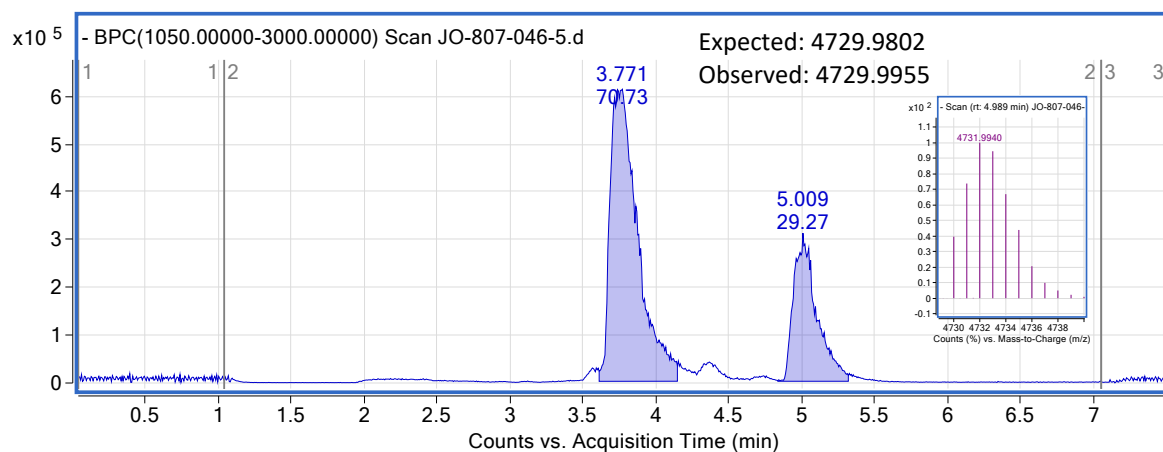

Figure S132: Mass spectrum of DNA-tagged product of reductive amination of HP2 and 5-chloropyrazine-2-carbaldehyde using TTAC as the surfactant analysed by DNA mass spectrometry gradient A.

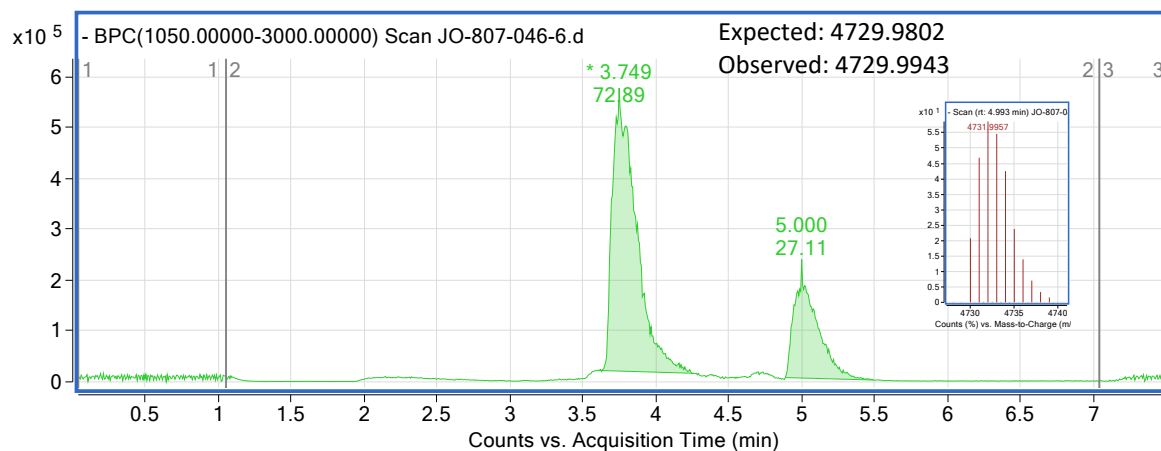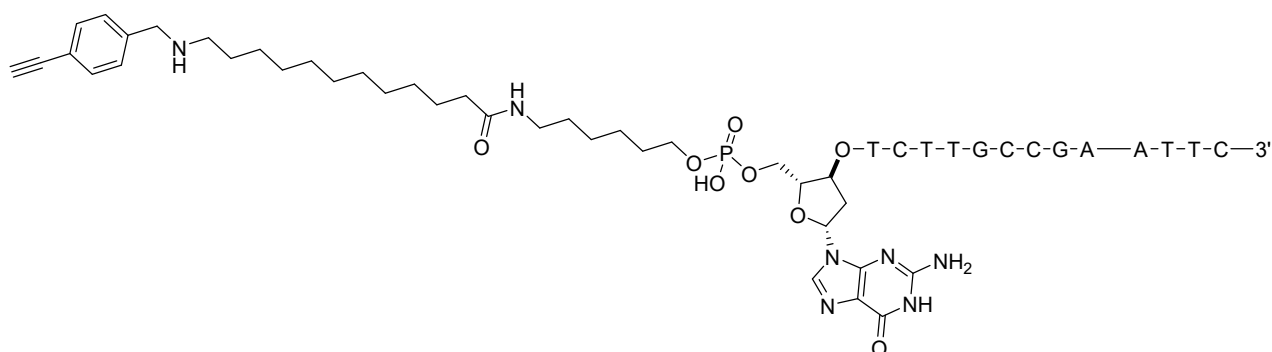

Figure S133: Mass spectrum of DNA-tagged product of reductive amination of HP2 and 4-ethynylbenzaldehyde using TPGS-750-M as the surfactant analysed by DNA mass spectrometry gradient A.

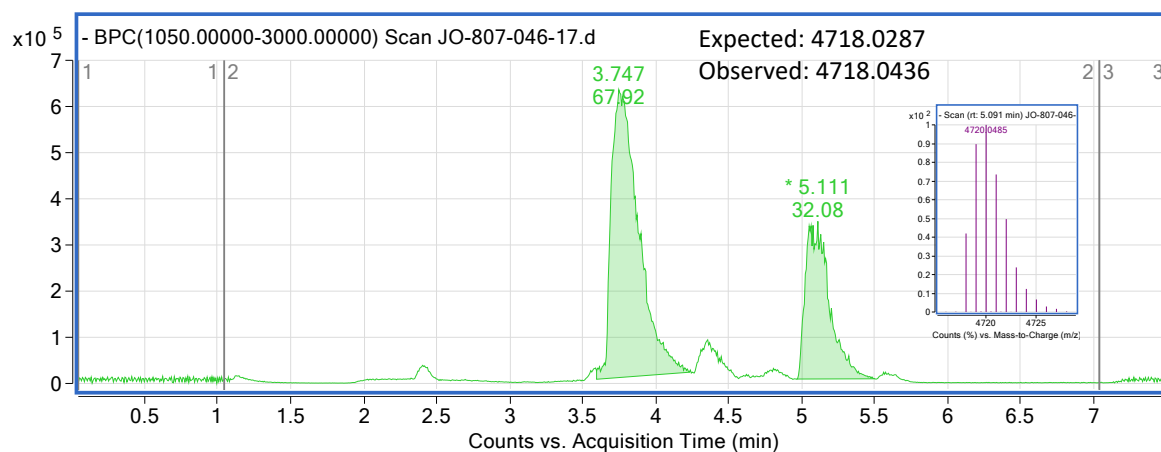



Figure S134: Mass spectrum of DNA-tagged product of reductive amination of HP2 and 4-ethynylbenzaldehyde using TTAC as the surfactant analysed by DNA mass spectrometry gradient A.

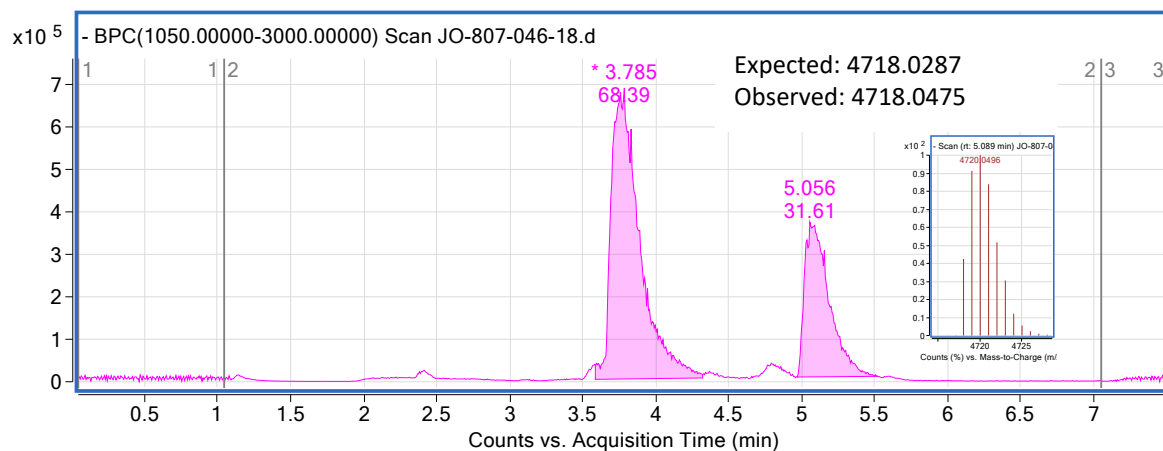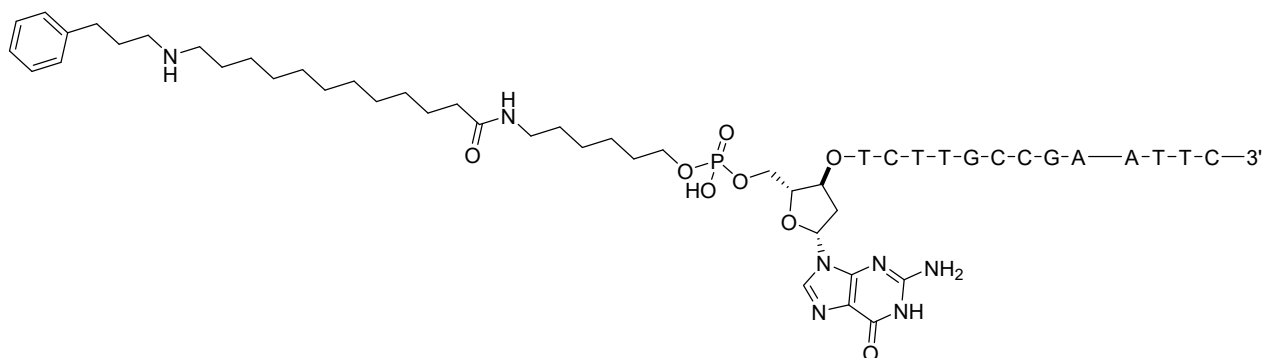

Figure S135: Mass spectrum of DNA-tagged product of reductive amination of HP2 and 3-phenylpropanal using TPGS-750-M as the surfactant analysed by DNA mass spectrometry gradient A.

Expected: 4722.0600  
Observed: 4722.1138

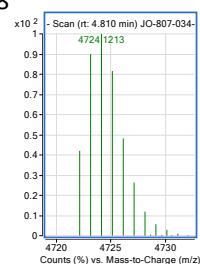

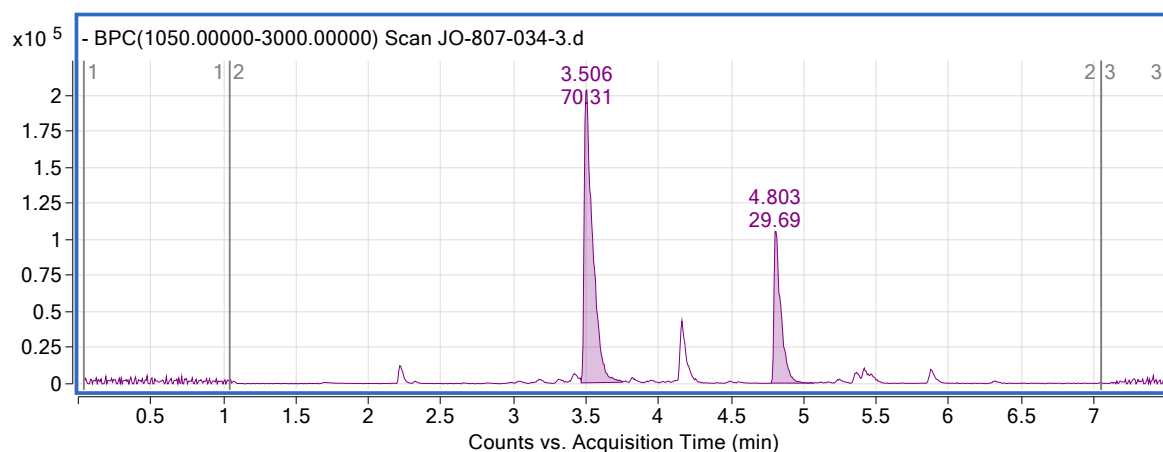

Figure S136: Mass spectrum of DNA-tagged product of reductive amination of HP2 and 3-phenylpropanal using TTAC as the surfactant analysed by DNA mass spectrometry gradient A.

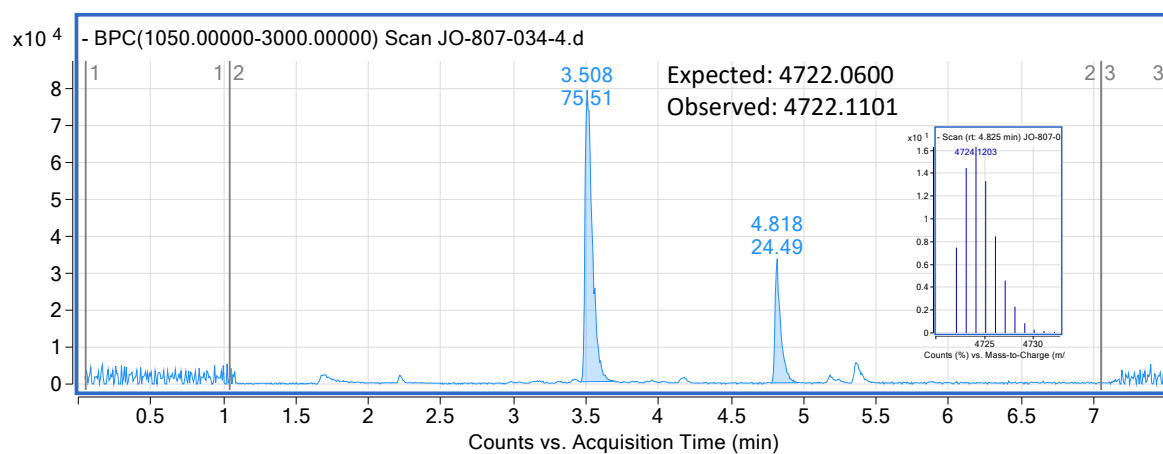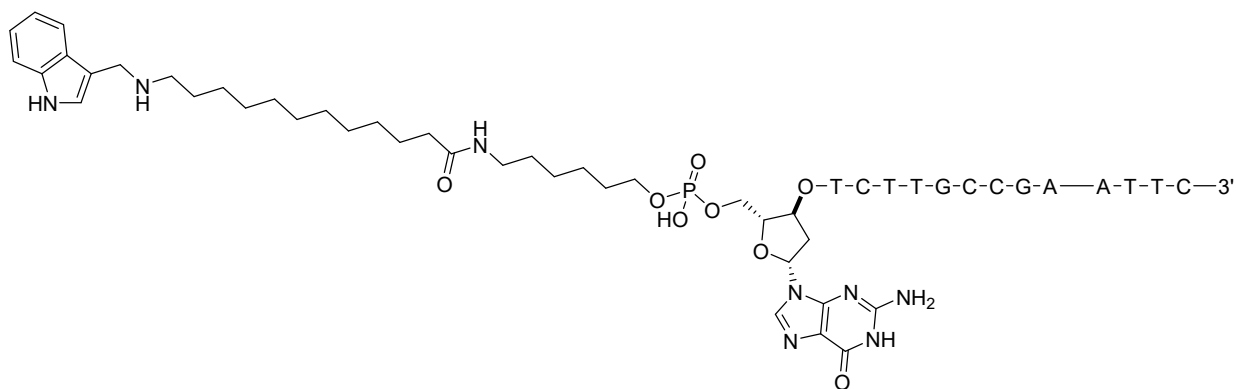

Figure S137: Mass spectrum of DNA-tagged product of reductive amination of HP2 and 1*H*-indole-3-carbaldehyde using TPGS-750-M as the surfactant analysed by DNA mass spectrometry gradient A.

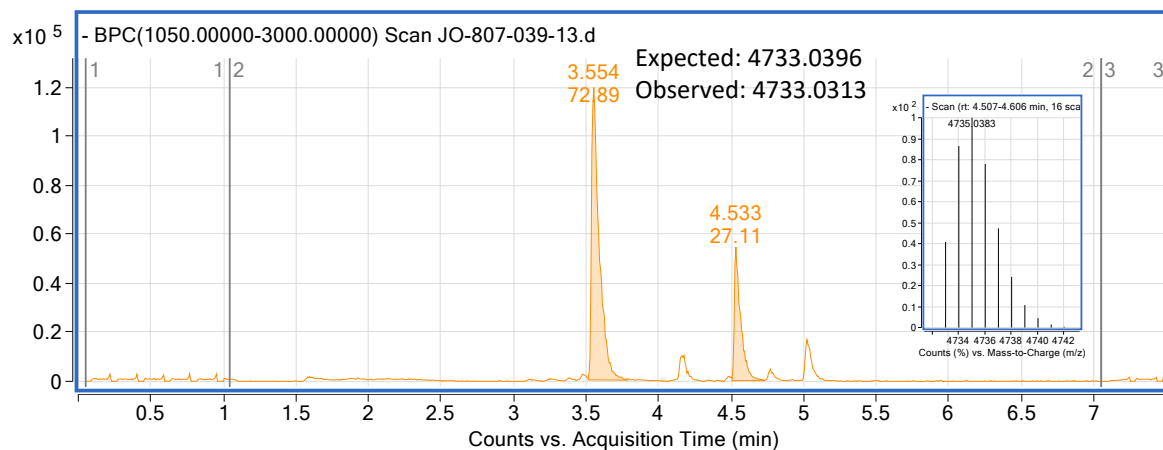

Figure S138: Mass spectrum of DNA-tagged product of reductive amination of HP2 and 1*H*-indole-3-carbaldehyde using TTAC as the surfactant analysed by DNA mass spectrometry gradient A.

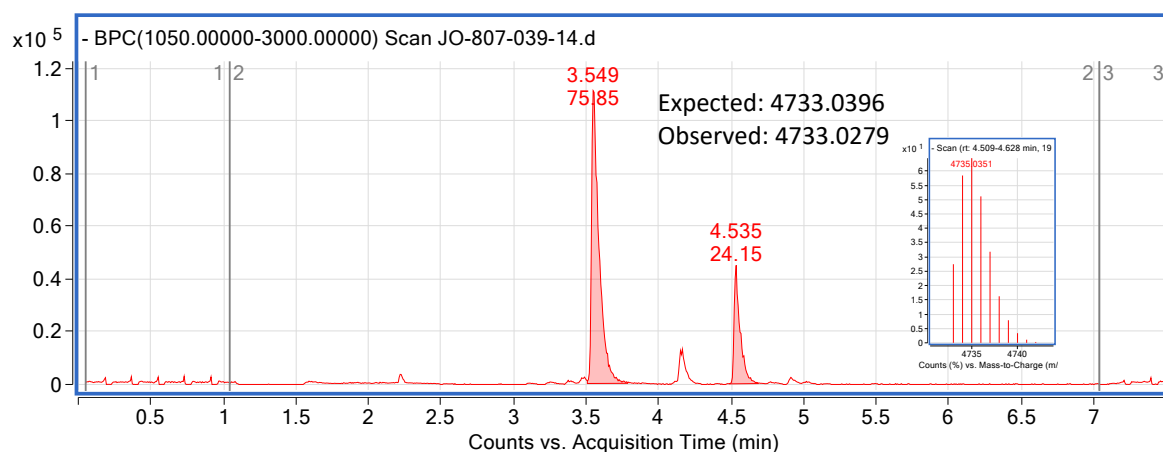

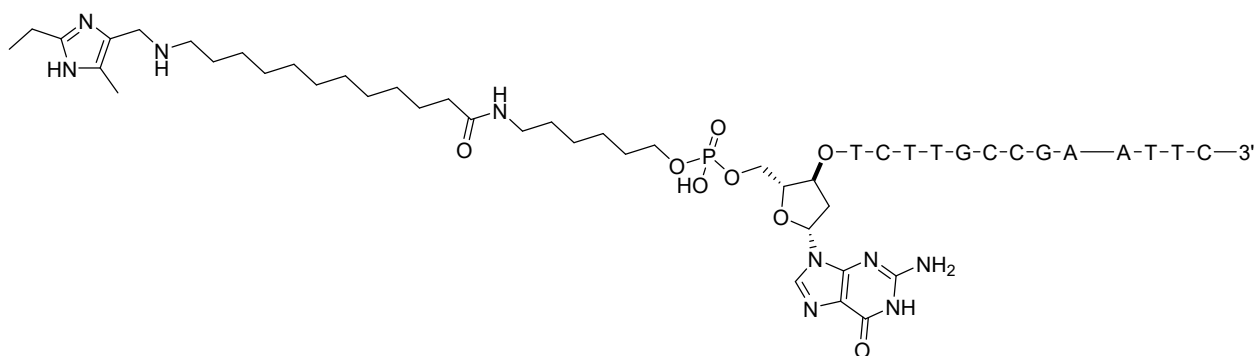

Figure S139: Mass spectrum of DNA-tagged product of reductive amination of HP2 and 2-ethyl-5-methyl-1*H*-imidazole-4-carbaldehyde using TPGS-750-M as the surfactant analysed by DNA mass spectrometry gradient A.

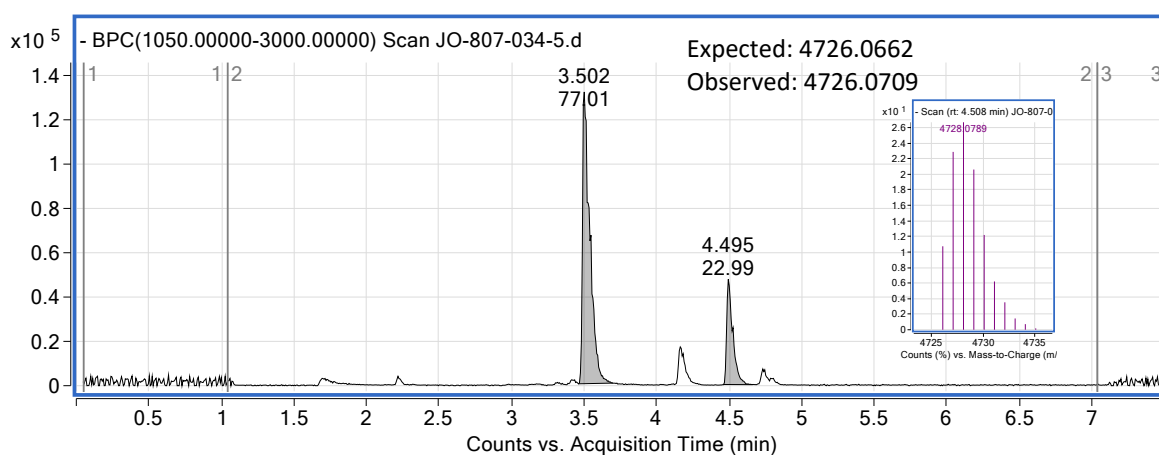

Figure S140: Mass spectrum of DNA-tagged product of reductive amination of HP2 and 2-ethyl-5-methyl-1*H*-imidazole-4-carbaldehyde using TTAC as the surfactant analysed by DNA mass spectrometry gradient A.

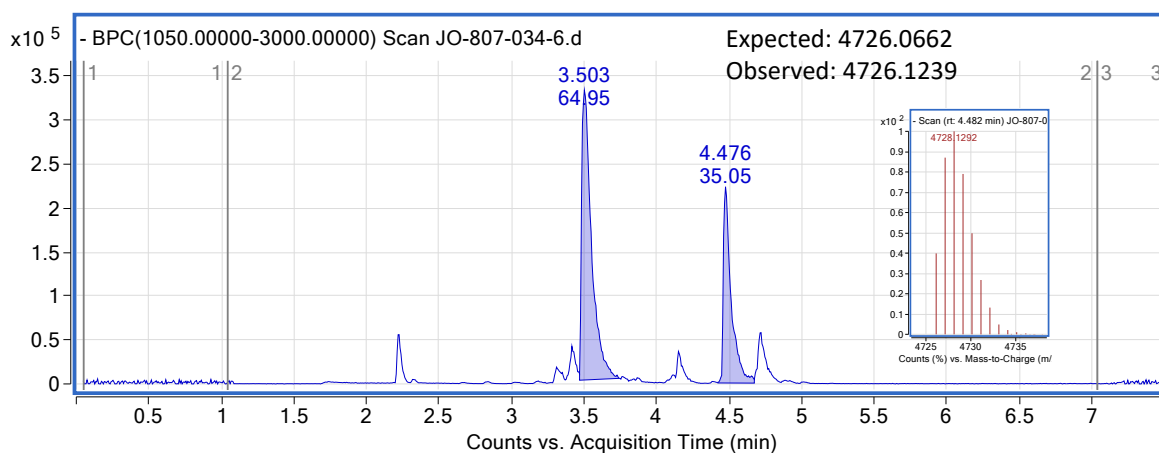

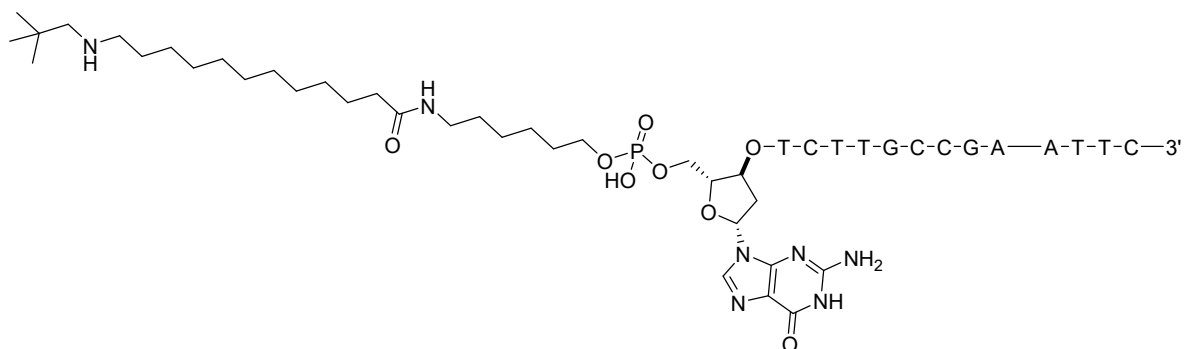

Figure S141: Mass spectrum of DNA-tagged product of reductive amination of HP2 and pivalaldehyde using TPGS-750-M as the surfactant analysed by DNA mass spectrometry gradient A.

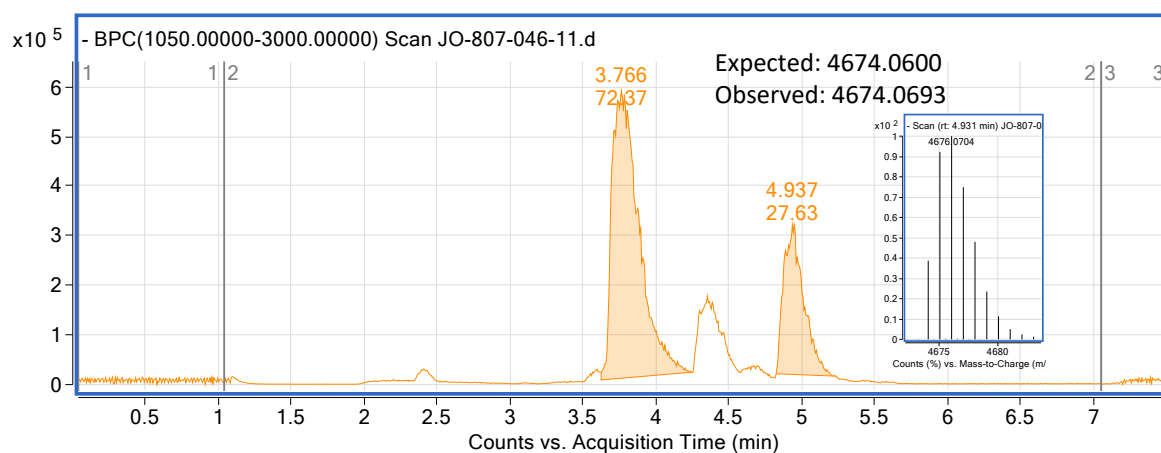

Figure S142: Mass spectrum of DNA-tagged product of reductive amination of HP2 and pivalaldehyde using TTAC as the surfactant analysed by DNA mass spectrometry gradient A.

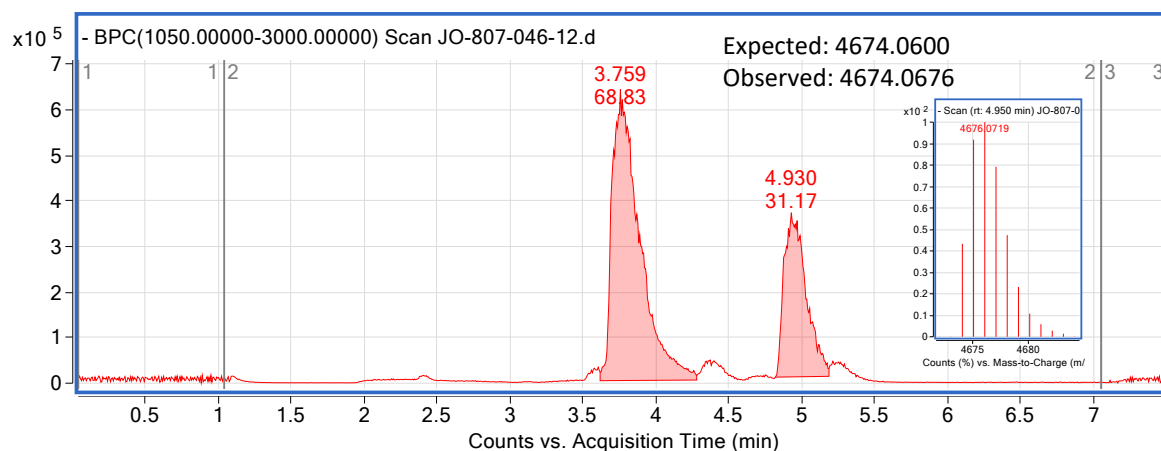

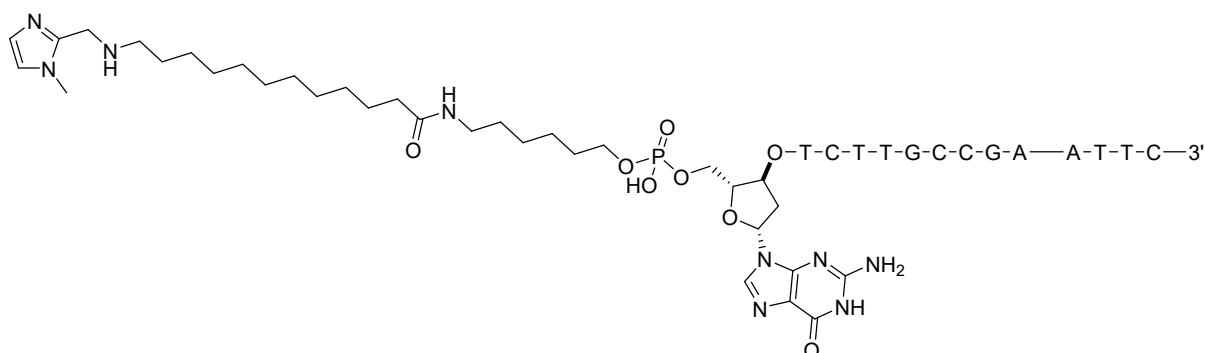

Figure S143: Mass spectrum of DNA-tagged product of reductive amination of HP2 and 1-methyl-1H-imidazole-2-carbaldehyde using TPGS-750-M as the surfactant analysed by DNA mass spectrometry gradient A.

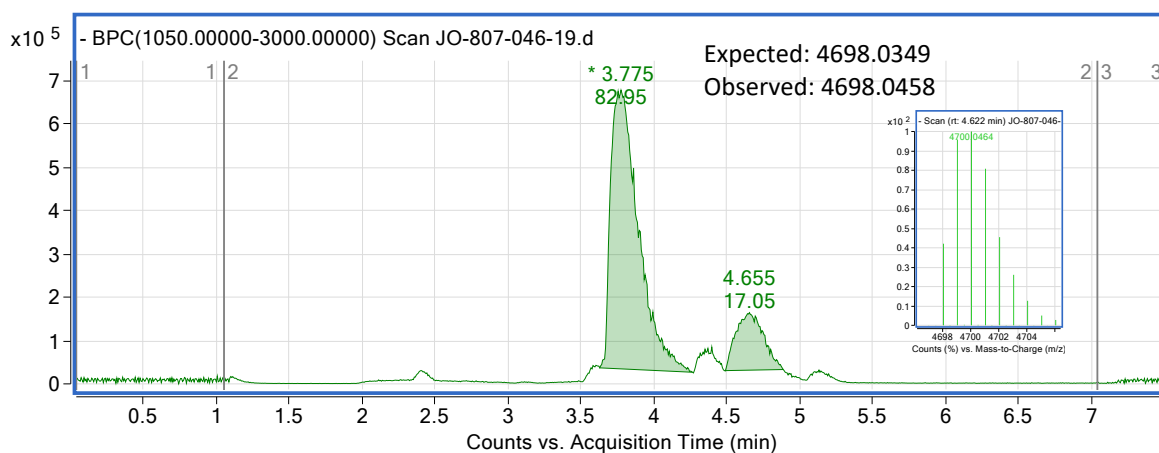

Figure S144: Mass spectrum of DNA-tagged product of reductive amination of HP2 and 1-methyl-1H-imidazole-2-carbaldehyde using TTAC as the surfactant analysed by DNA mass spectrometry gradient A.

Expected: 4698.0349  
Observed: 4698.0475

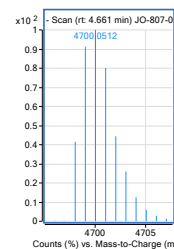

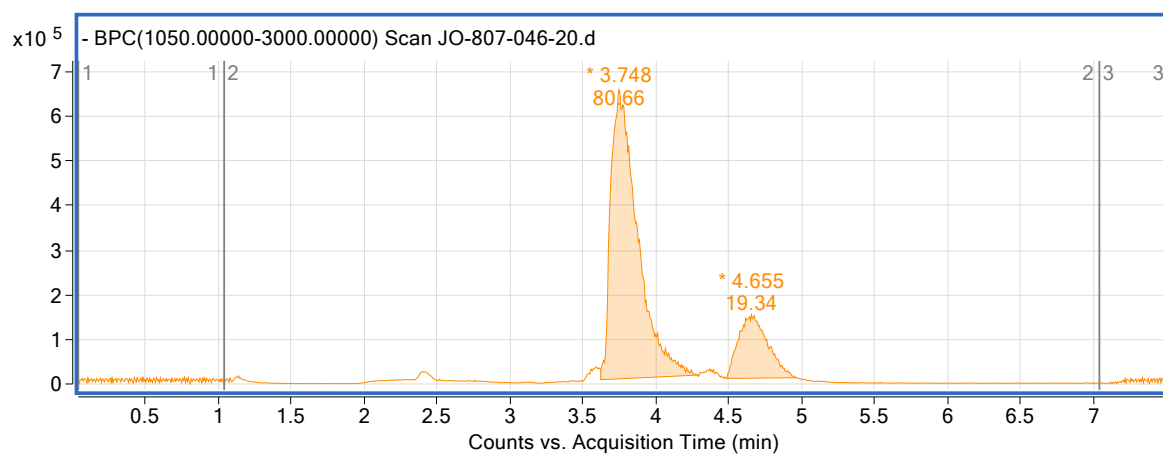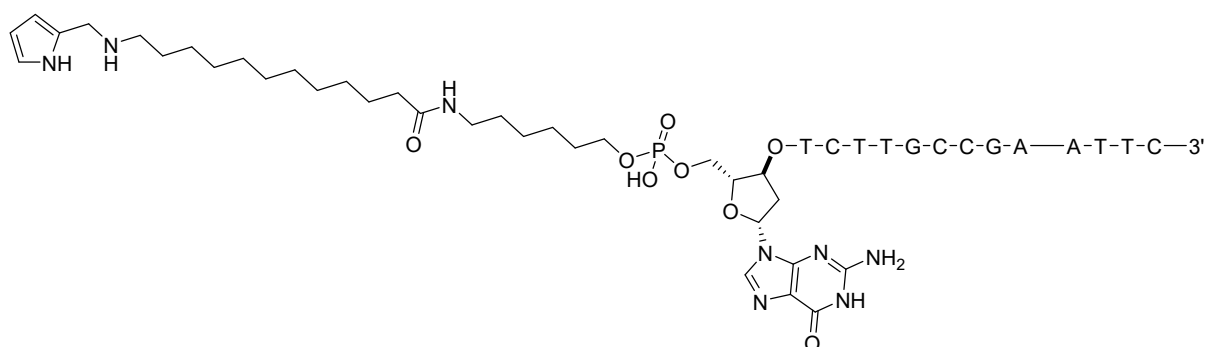

Figure S145: Mass spectrum of DNA-tagged product of reductive amination of HP2 and 1*H*-pyrrole-2-carbaldehyde using TPGS-750-M as the surfactant analysed by DNA mass spectrometry gradient A.

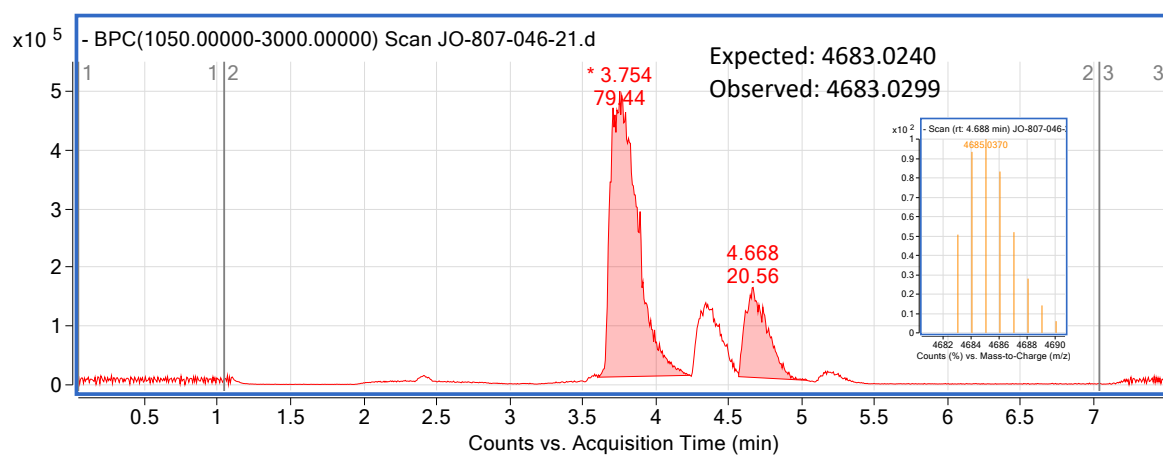

Figure S146: Mass spectrum of DNA-tagged product of reductive amination of HP2 and 1*H*-pyrrole-2-carbaldehyde using TTAC as the surfactant analysed by DNA mass spectrometry gradient A.

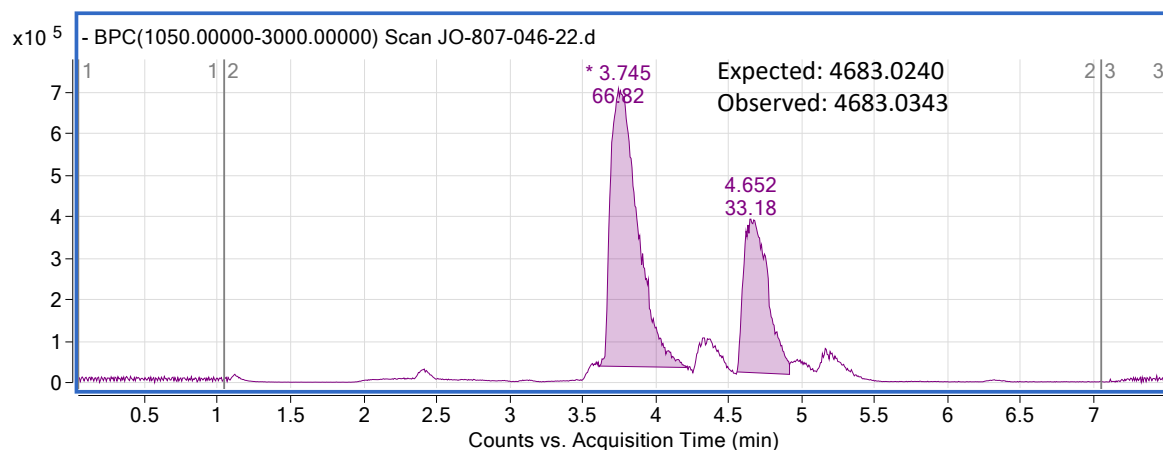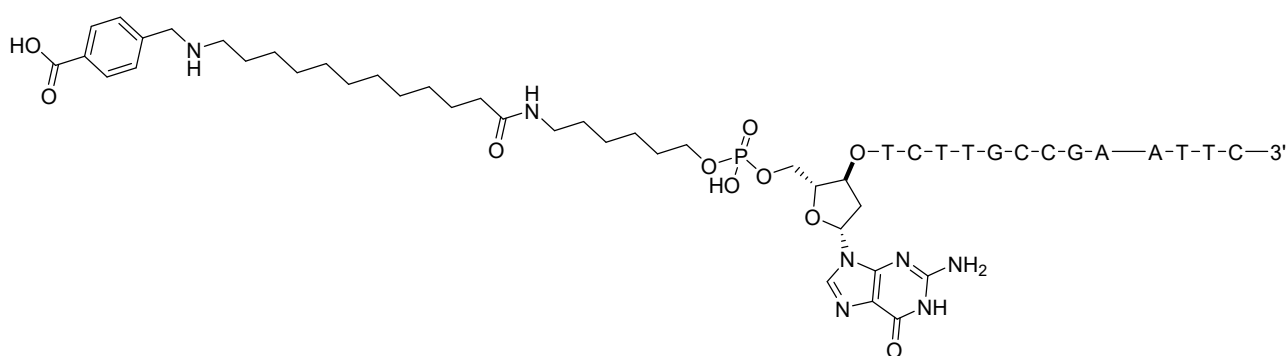

Figure S147: Mass spectrum of DNA-tagged product of reductive amination of HP2 and 4-formylbenzoic acid using TPGS-750-M as the surfactant analysed by DNA mass spectrometry gradient A.

Expected: 4738.0185  
Observed: 4738.0723

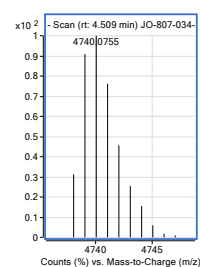



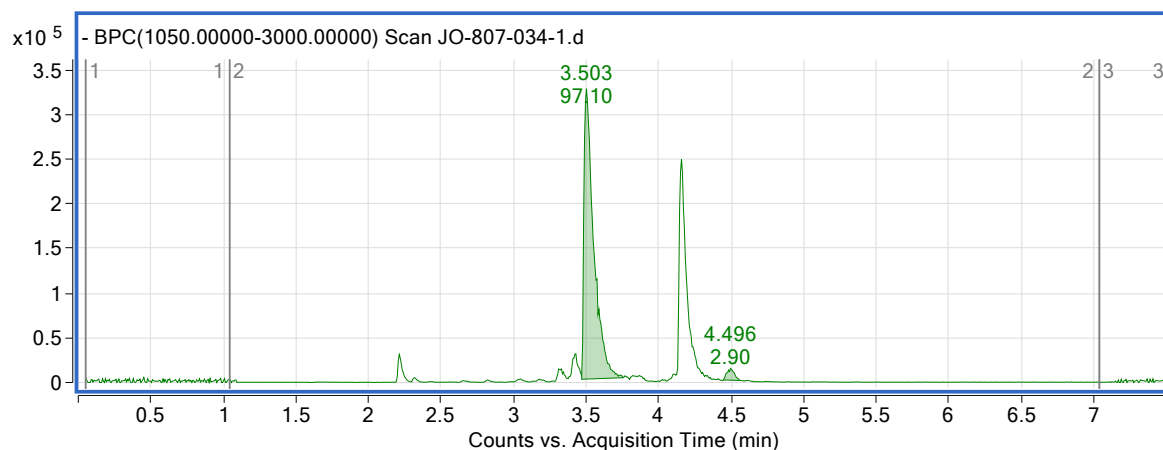

Figure S148: Mass spectrum of DNA-tagged product of reductive amination of HP2 and 4-formylbenzoic acid using TTAC as the surfactant analysed by DNA mass spectrometry gradient A.

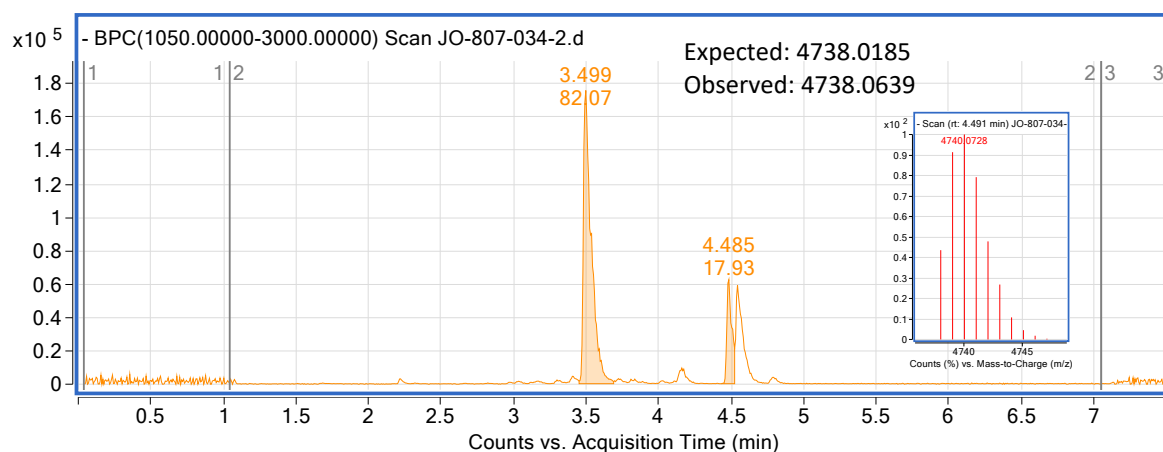

### On-DNA Reverse Amide Coupling Reaction of DNA-Conjugated Acid HP3

#### Table 8/9 Chromatograms

Compound 6 was synthesised according to general reverse amide coupling procedure.

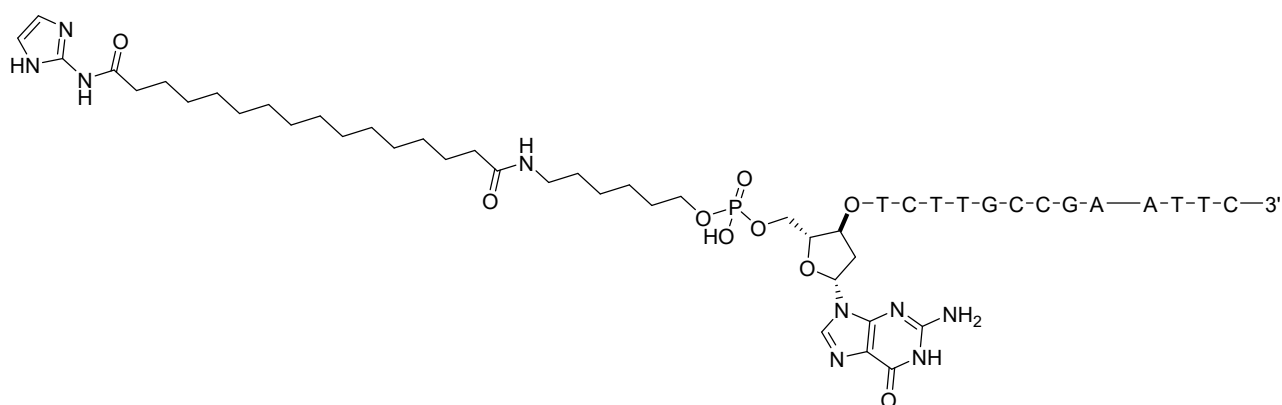

Figure S149: Mass spectrum of DNA-tagged product of reverse amide coupling of HP3 and 1H-imidazol-2-amine hemisulfate with no surfactant analysed by DNA mass spectrometry gradient C.

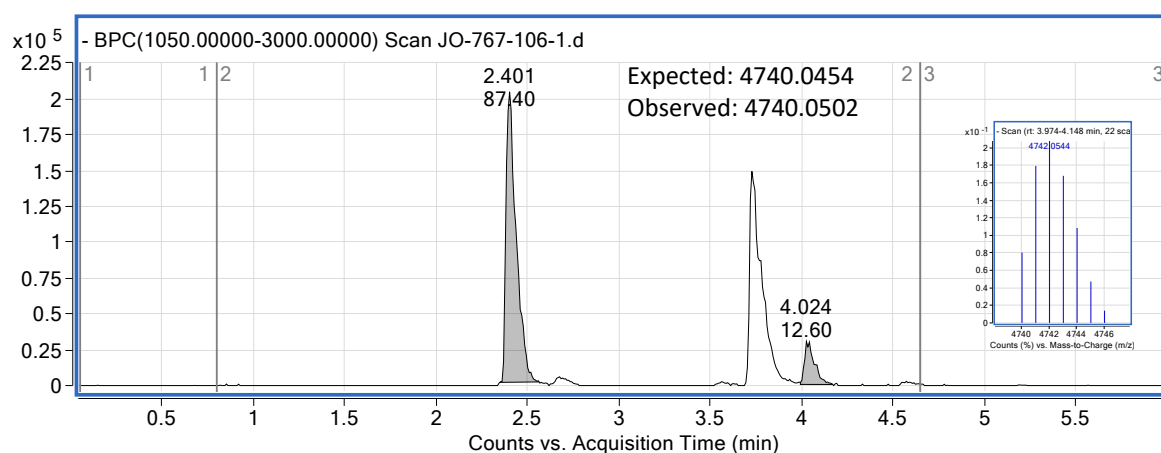

Figure S150: Mass spectrum of DNA-tagged product of reverse amide coupling of HP3 and 1H-imidazol-2-amine hemisulfate using TPGS-750-M as the surfactant analysed by DNA mass spectrometry gradient C.

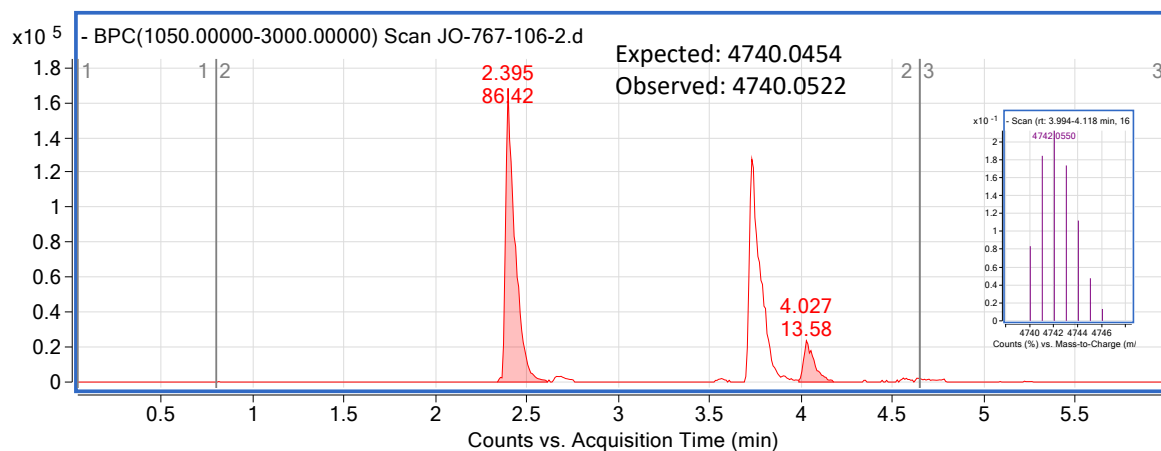

Figure S151: Mass spectrum of DNA-tagged product of reverse amide coupling of HP3 and 1*H*-imidazol-2-amine hemisulfate using Tween65 as the surfactant analysed by DNA mass spectrometry gradient C.

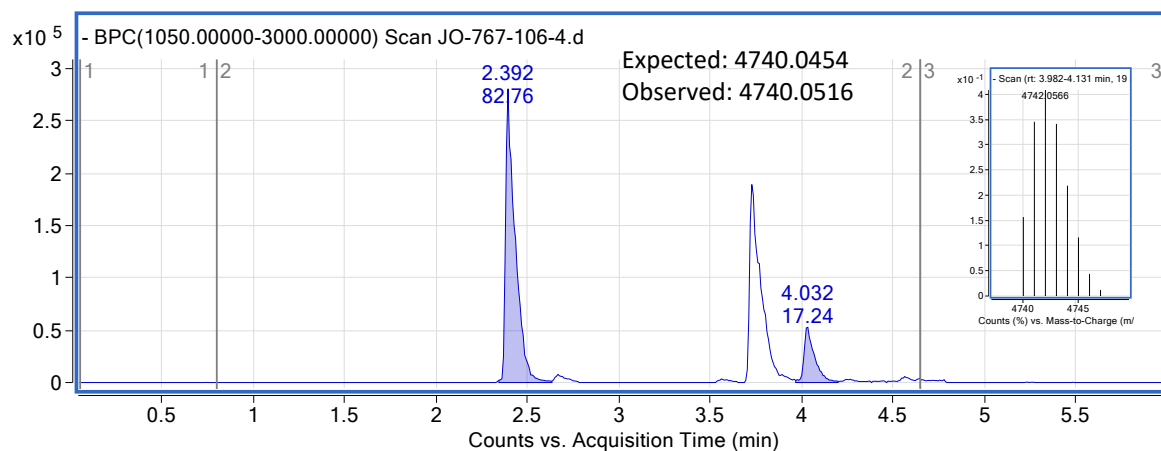

Figure S152: Mass spectrum of DNA-tagged product of reverse amide coupling of HP3 and 1*H*-imidazol-2-amine hemisulfate using Brij700 as the surfactant analysed by DNA mass spectrometry gradient C.

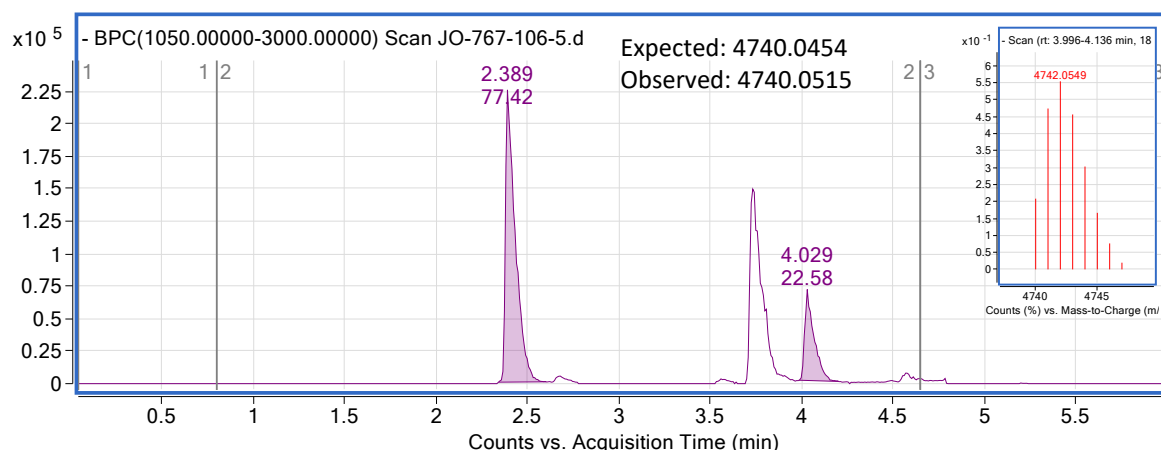

Figure S153: Mass spectrum of DNA-tagged product of reverse amide coupling of HP3 and 1*H*-imidazol-2-amine hemisulfate using BrijS20 as the surfactant analysed by DNA mass spectrometry gradient C.

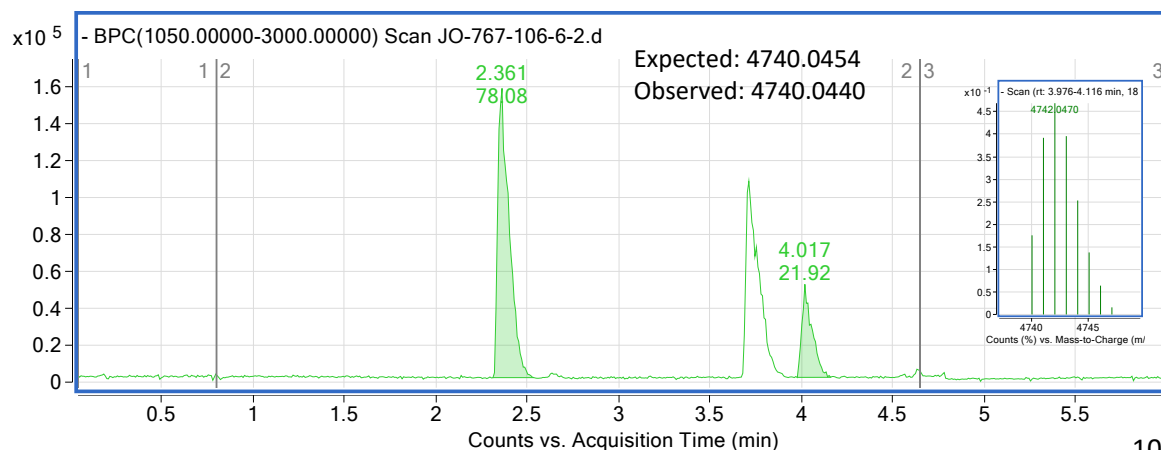

Figure S154: Mass spectrum of DNA-tagged product of reverse amide coupling of HP3 and 1*H*-imidazol-2-amine hemisulfate using Triton-X-405 as the surfactant analysed by DNA mass spectrometry gradient C.

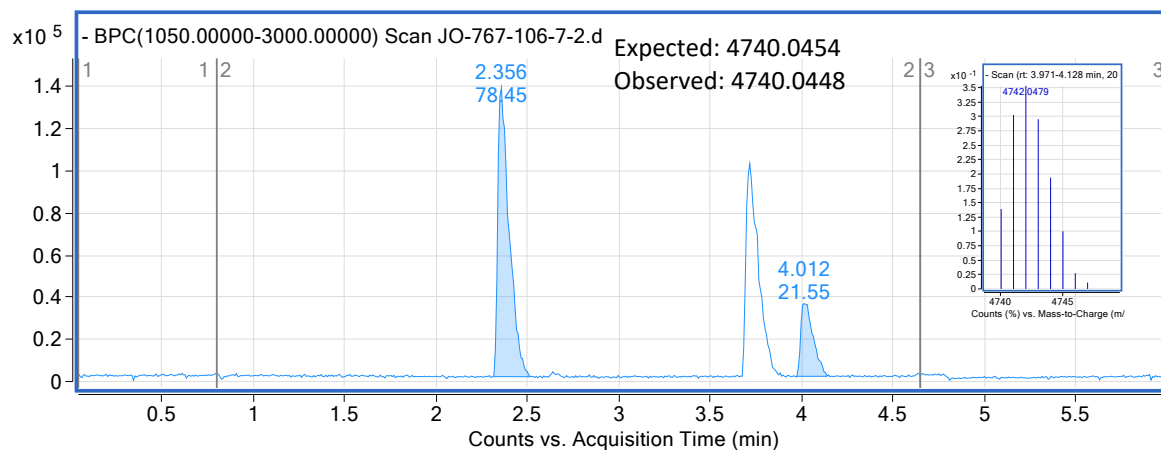

Figure S155: Mass spectrum of DNA-tagged product of reverse amide coupling of HP3 and 1*H*-imidazol-2-amine hemisulfate using TTAC as the surfactant analysed by DNA mass spectrometry gradient C.

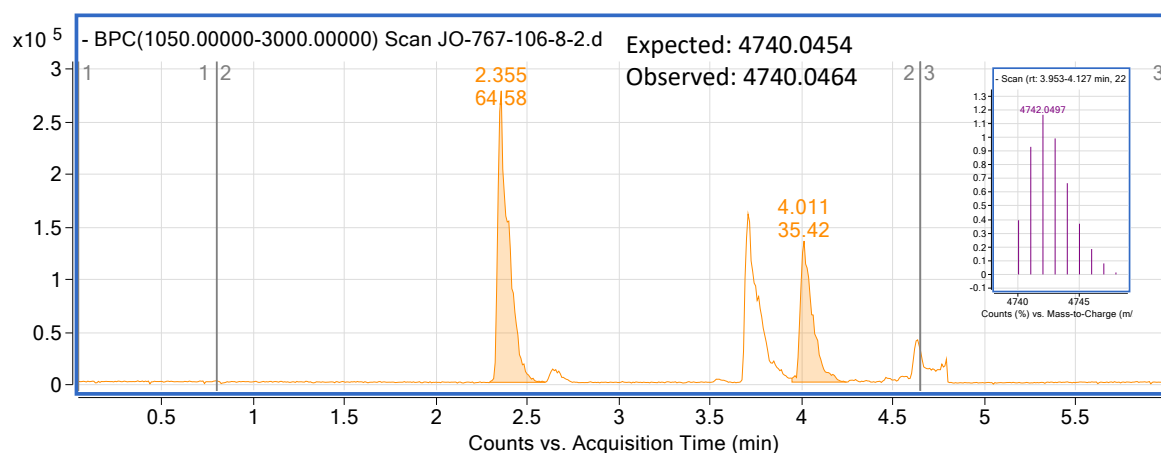

Figure S156: Mass spectrum of DNA-tagged product of reverse amide coupling of HP3 and 1*H*-imidazol-2-amine hemisulfate using Sulfobetaine-16 as the surfactant analysed by DNA mass spectrometry gradient C.

Expected: 4740.0454  
Observed: 4740.0504

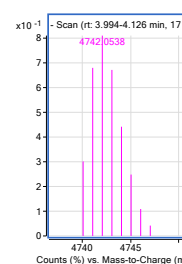

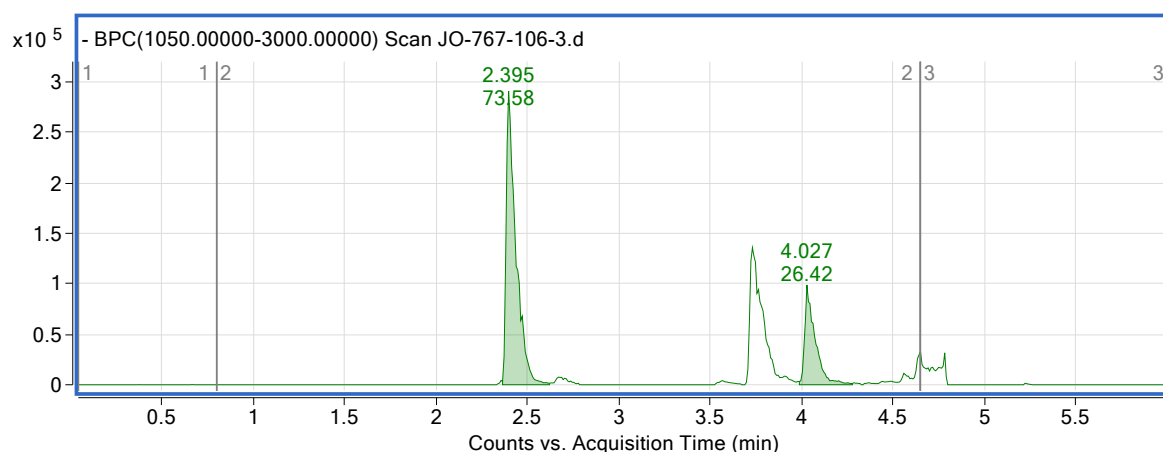

Figure S157: Mass spectrum of DNA-tagged product of reverse amide coupling of HP3 and 1H-imidazol-2-amine hemisulfate using Tween85 as the surfactant analysed by DNA mass spectrometry gradient A.

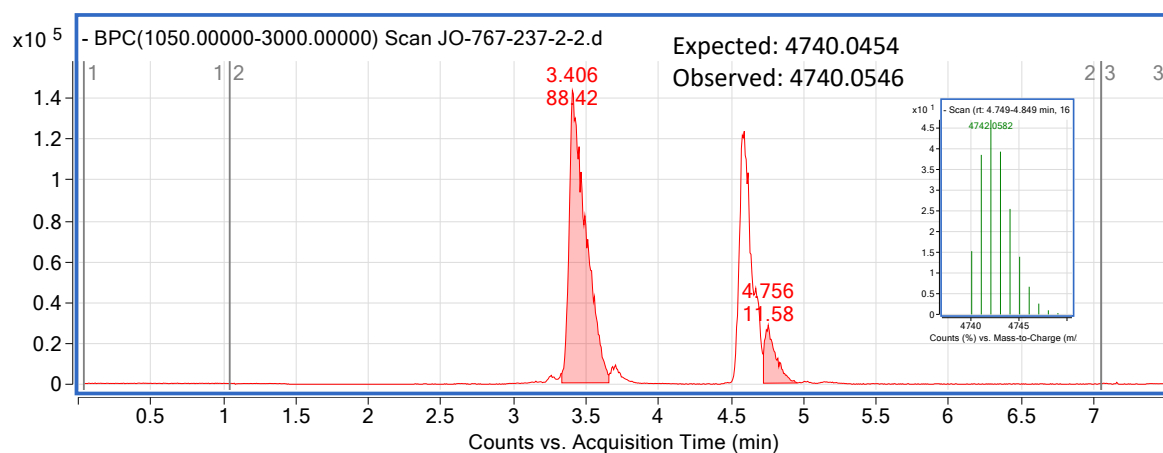

Figure S158: Mass spectrum of DNA-tagged product of reverse amide coupling of HP3 and 1H-imidazol-2-amine hemisulfate using Citrol 4DS as the surfactant analysed by DNA mass spectrometry gradient A.

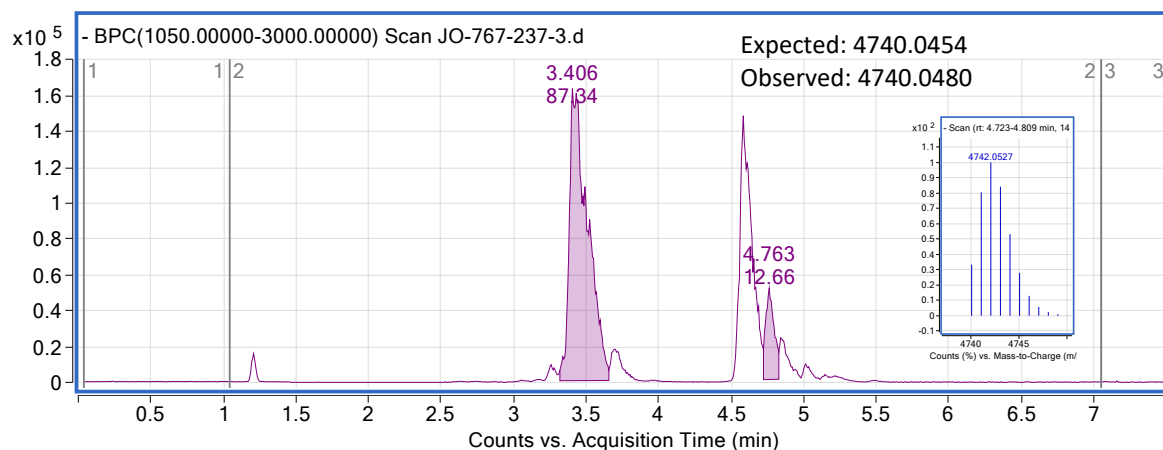

Figure S159: Mass spectrum of DNA-tagged product of reverse amide coupling of HP3 and 1*H*-imidazol-2-amine hemisulfate using Span65 as the surfactant analysed by DNA mass spectrometry gradient A.

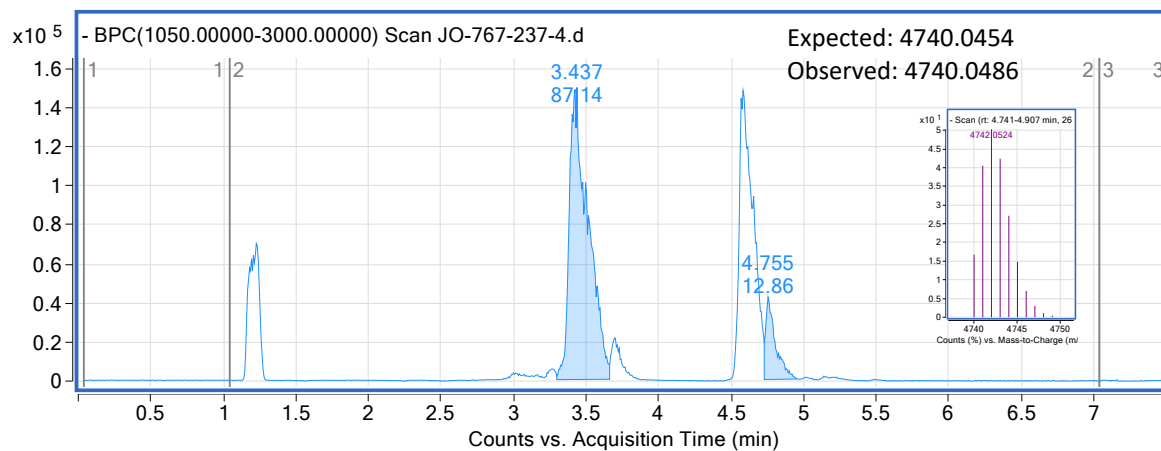

Figure S160: Mass spectrum of DNA-tagged product of reverse amide coupling of HP3 and 1*H*-imidazol-2-amine hemisulfate using Span85 as the surfactant analysed by DNA mass spectrometry gradient A.

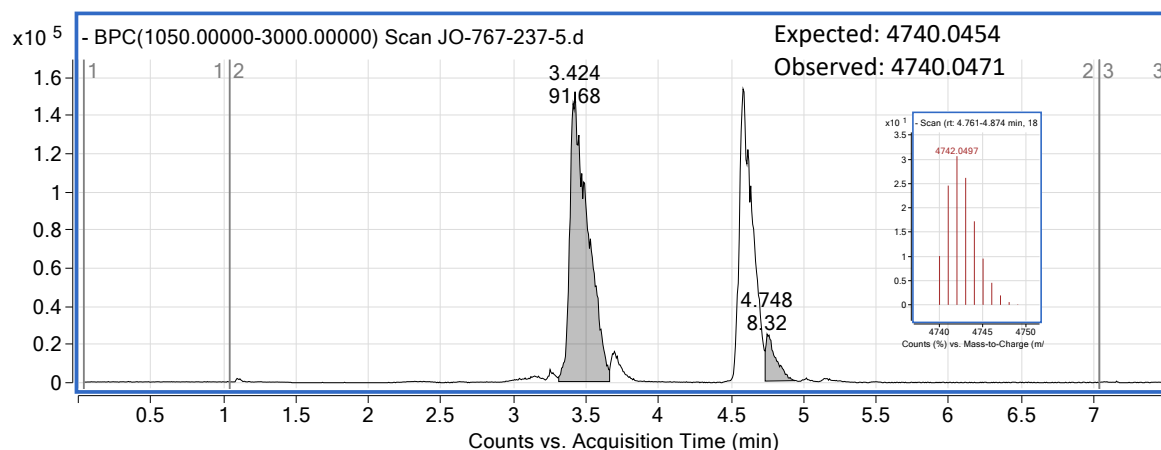

Table 10 Chromatograms

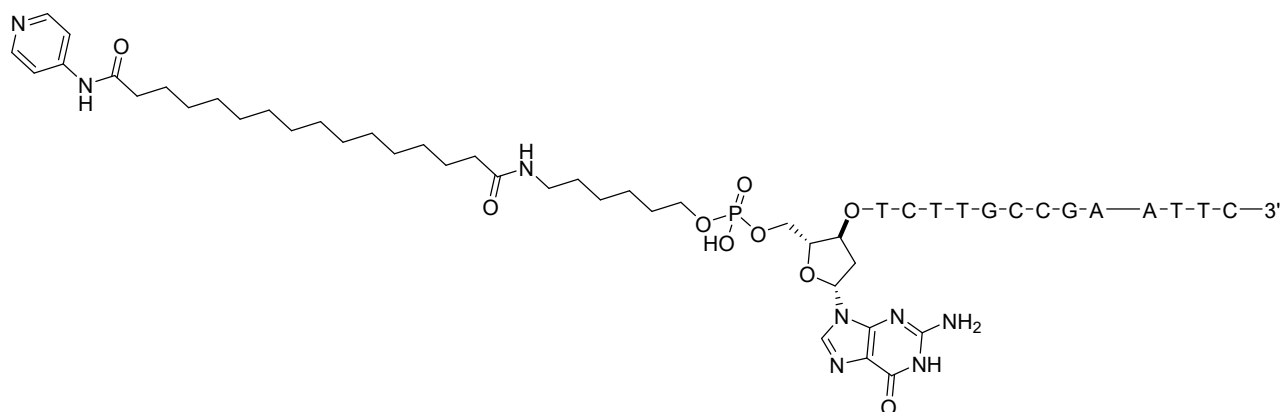

Figure S161: Mass spectrum of DNA-tagged product of reverse amide coupling of HP3 and pyridin-4-amine using TPGS-750-M as the surfactant analysed by DNA mass spectrometry gradient A.

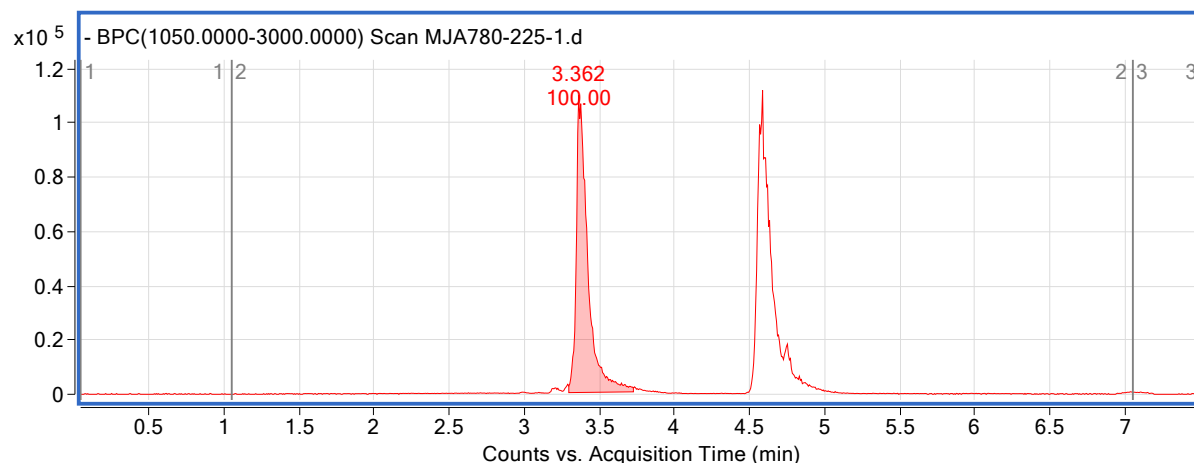

Figure S162: Mass spectrum of DNA-tagged product of reverse amide coupling of HP3 and pyridin-4-amine using TTAC as the surfactant analysed by DNA mass spectrometry gradient A.

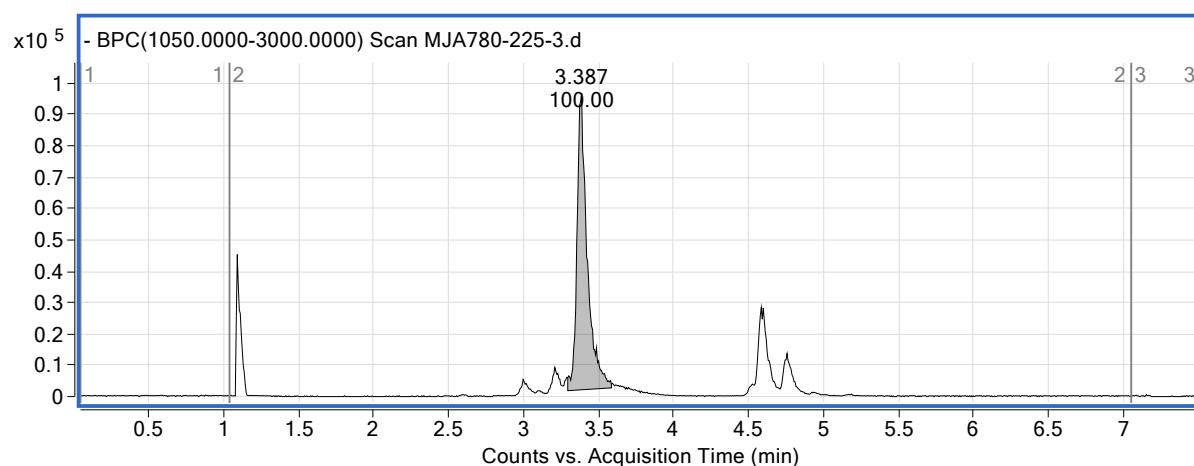

Figure S163: Mass spectrum of DNA-tagged product of reverse amide coupling of HP3 and pyridin-4-amine using Sulfobetaine-16 as the surfactant analysed by DNA mass spectrometry gradient A.

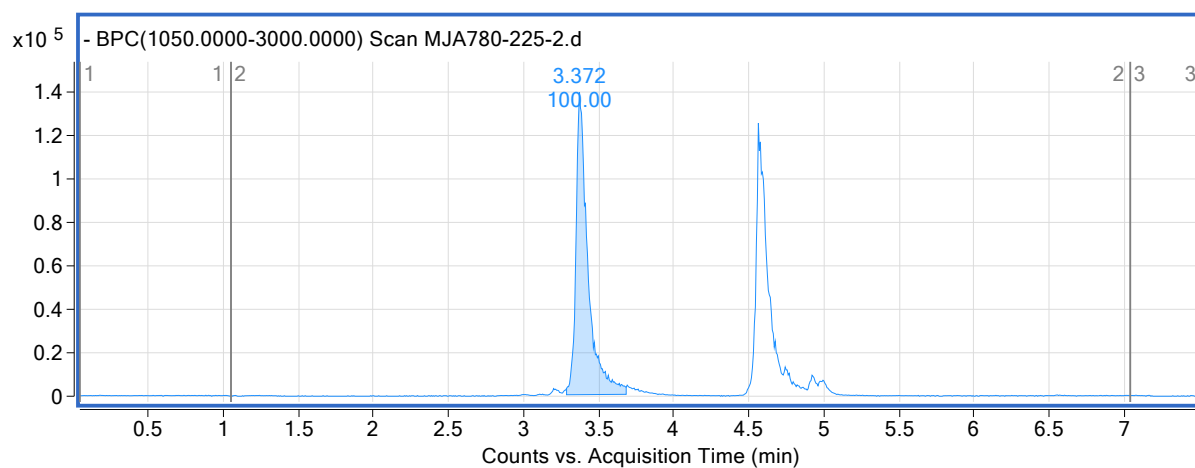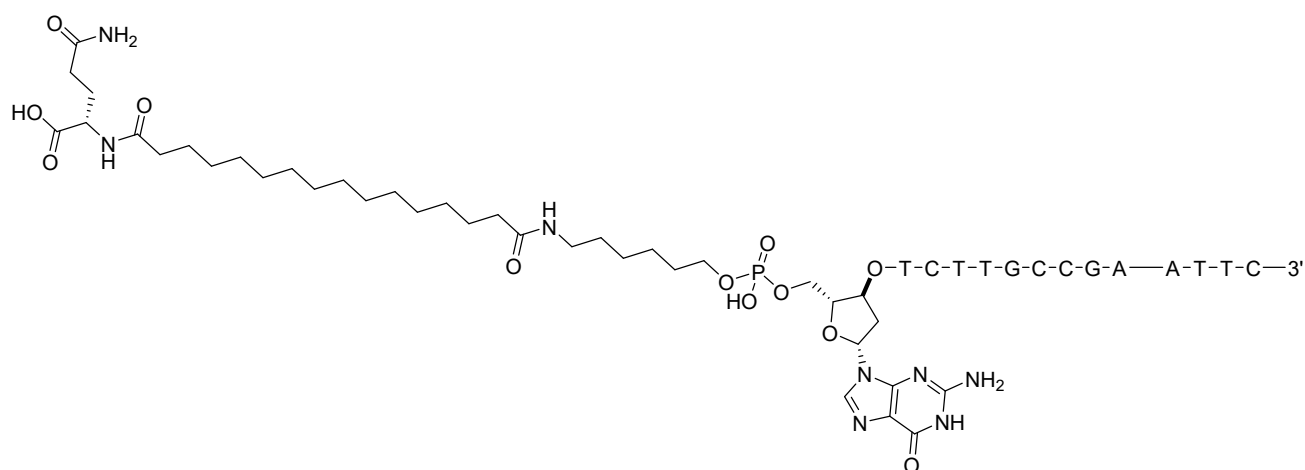

Figure S164: Mass spectrum of DNA-tagged product of reverse amide coupling of HP3 and *L*-glutamine using TPGS-750-M as the surfactant analysed by DNA mass spectrometry gradient A.

Expected: 4803.0662  
Observed: 4803.0653

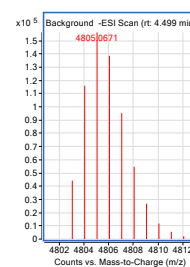



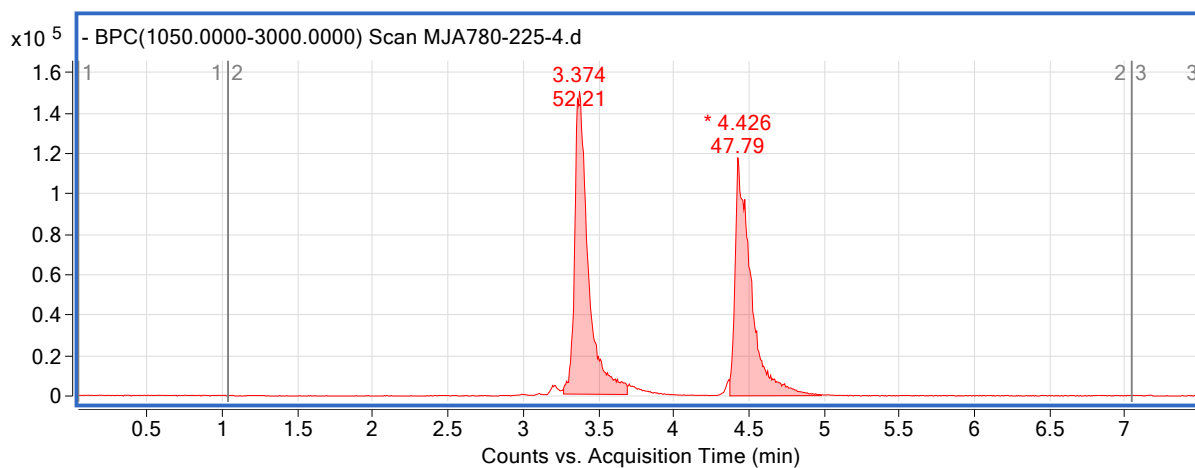

Figure S165: Mass spectrum of DNA-tagged product of reverse amide coupling of HP3 and *L*-glutamine using TTAC as the surfactant analysed by DNA mass spectrometry gradient A.

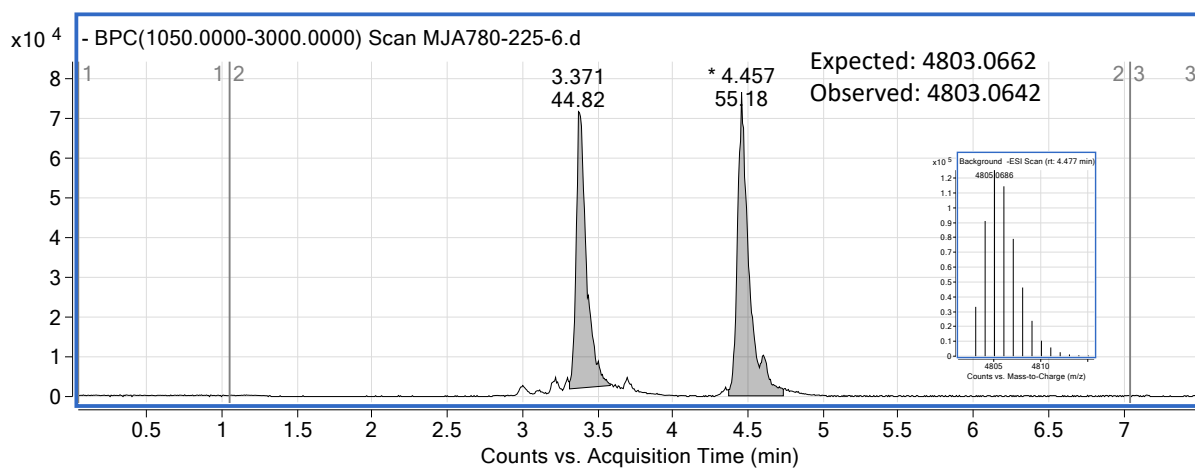

Figure S166: Mass spectrum of DNA-tagged product of reverse amide coupling of HP3 and *L*-glutamine using SulfoBetaine-16 as the surfactant analysed by DNA mass spectrometry gradient A.

Expected: 4803.0662  
Observed: 4803.0647

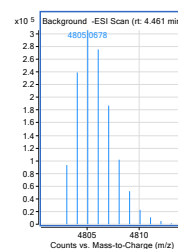

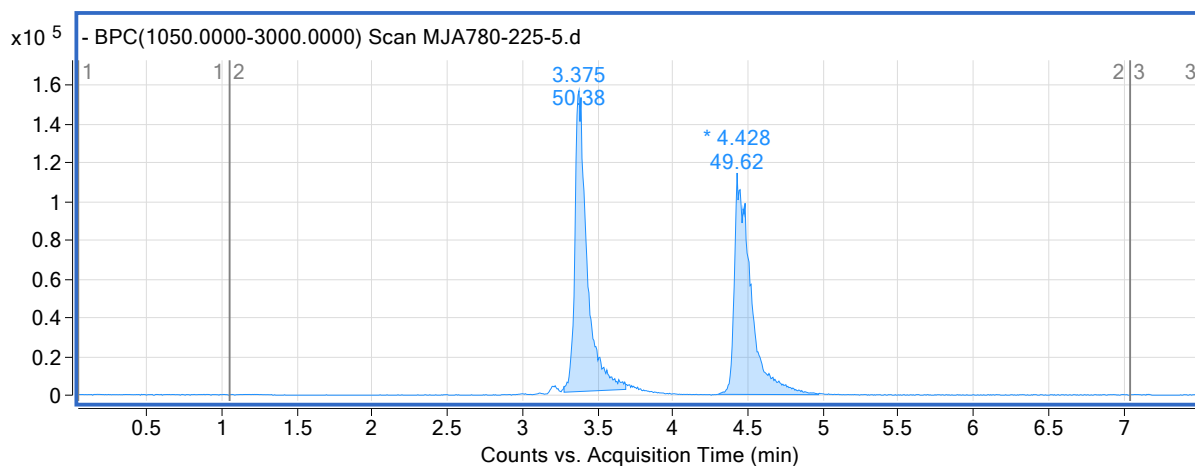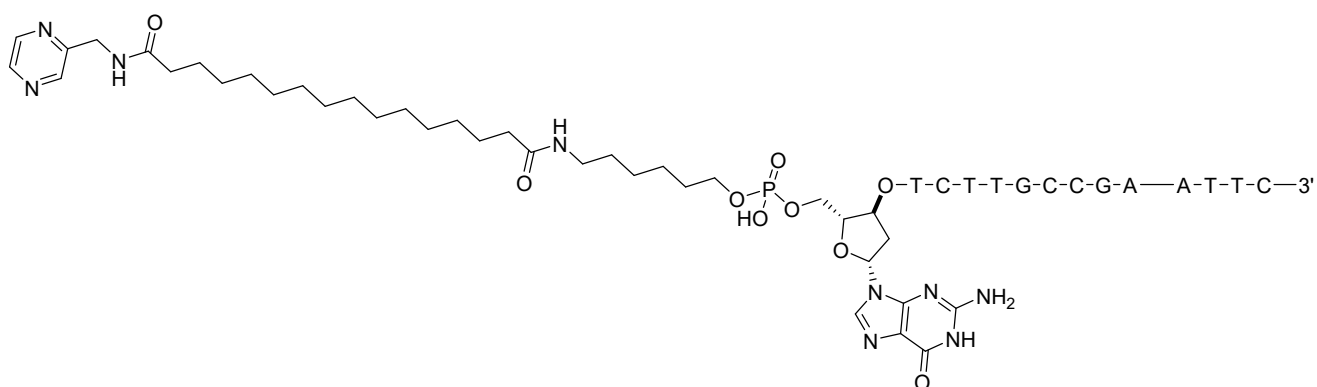

Figure S167: Mass spectrum of DNA-tagged product of reverse amide coupling of HP3 and pyrazin-2-ylmethanamine using TPGS-750-M as the surfactant analysed by DNA mass spectrometry gradient A.

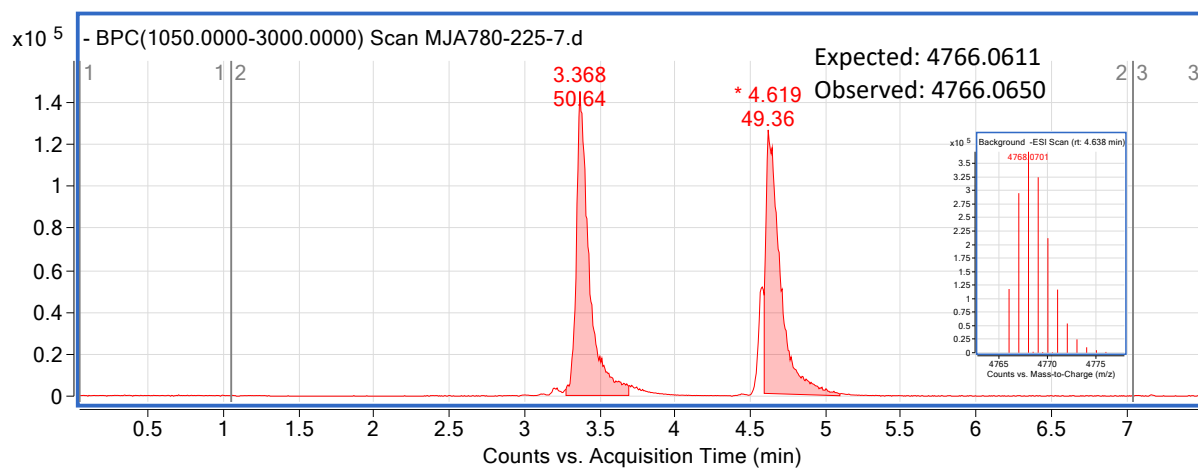

Figure S168: Mass spectrum of DNA-tagged product of reverse amide coupling of HP3 and pyrazin-2-ylmethanamine using TTAC as the surfactant analysed by DNA mass spectrometry gradient A.

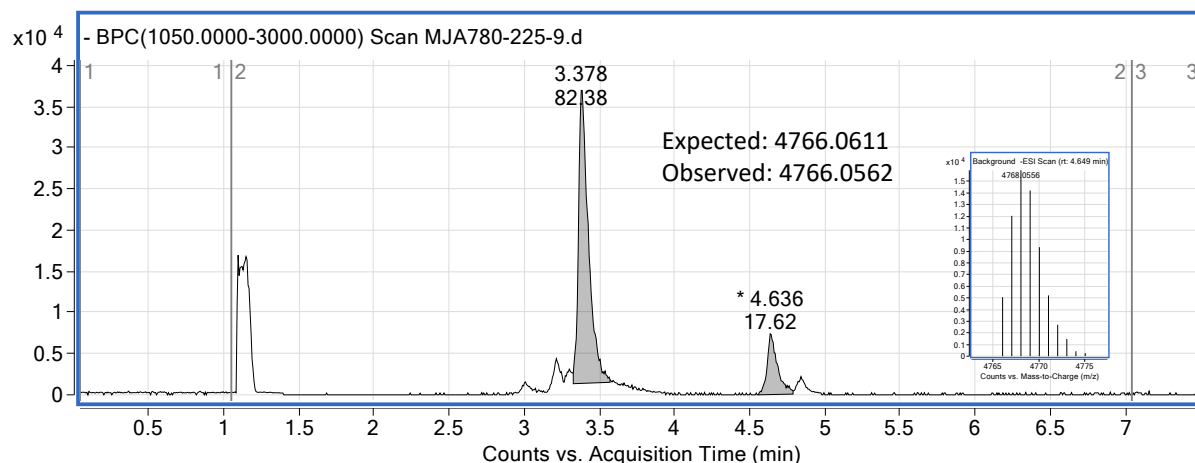

Figure S169: Mass spectrum of DNA-tagged product of reverse amide coupling of HP3 and pyrazin-2-ylmethanamine using Sulfo betaine-16 as the surfactant analysed by DNA mass spectrometry gradient A.

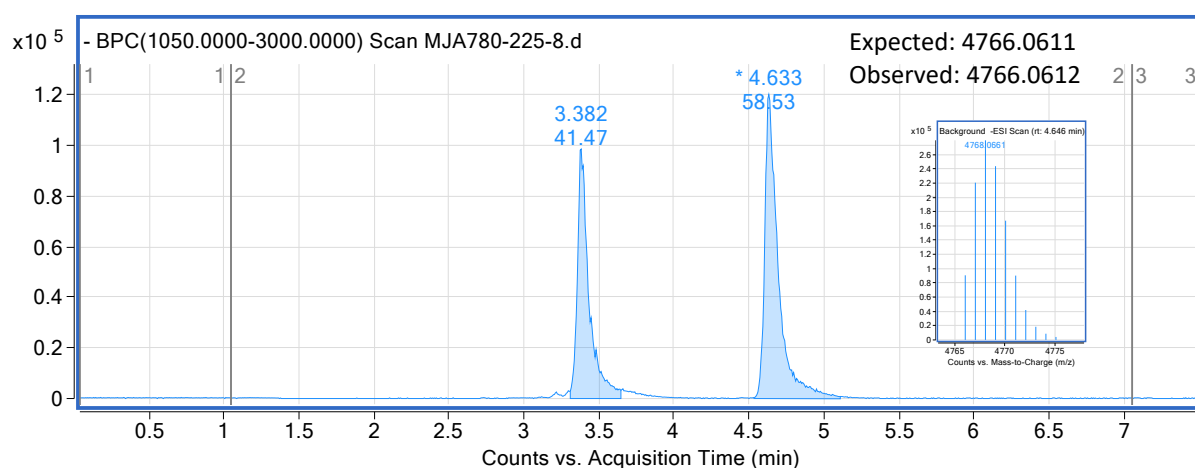

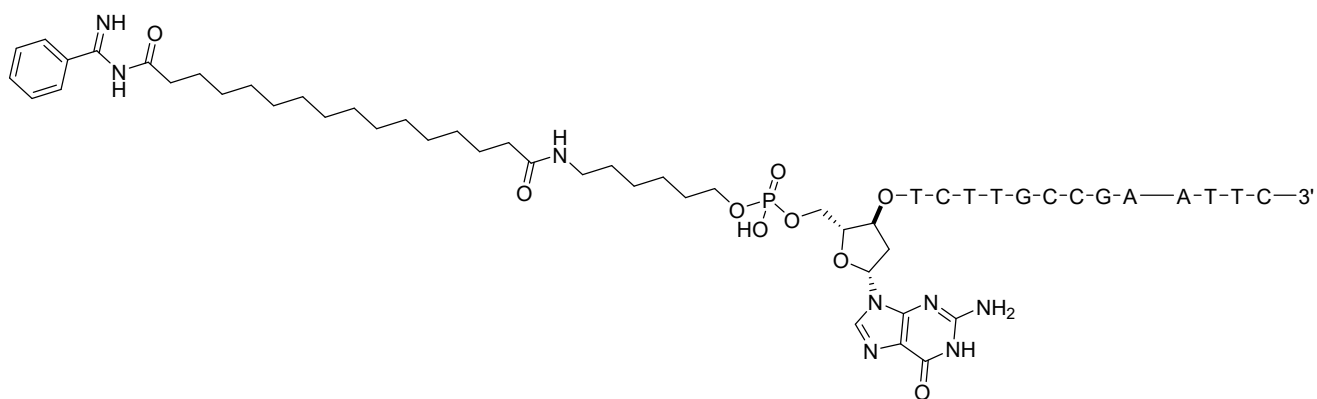

Figure S170: Mass spectrum of DNA-tagged product of reverse amide coupling of HP3 and benzimidamide using TPGS-750-M as the surfactant analysed by DNA mass spectrometry gradient A.

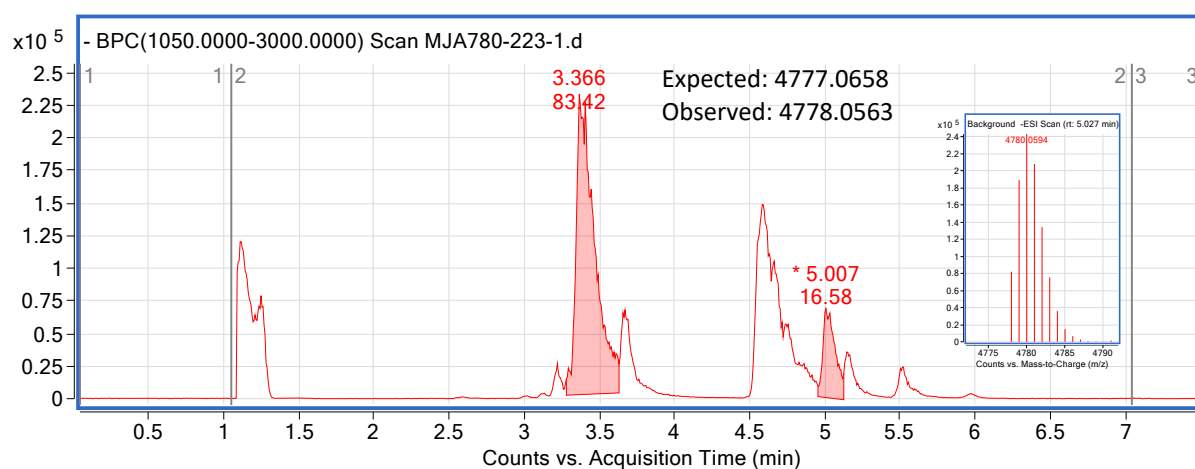

Figure S171: Mass spectrum of DNA-tagged product of reverse amide coupling of HP3 and benzimidamide using TTAC as the surfactant analysed by DNA mass spectrometry gradient A.

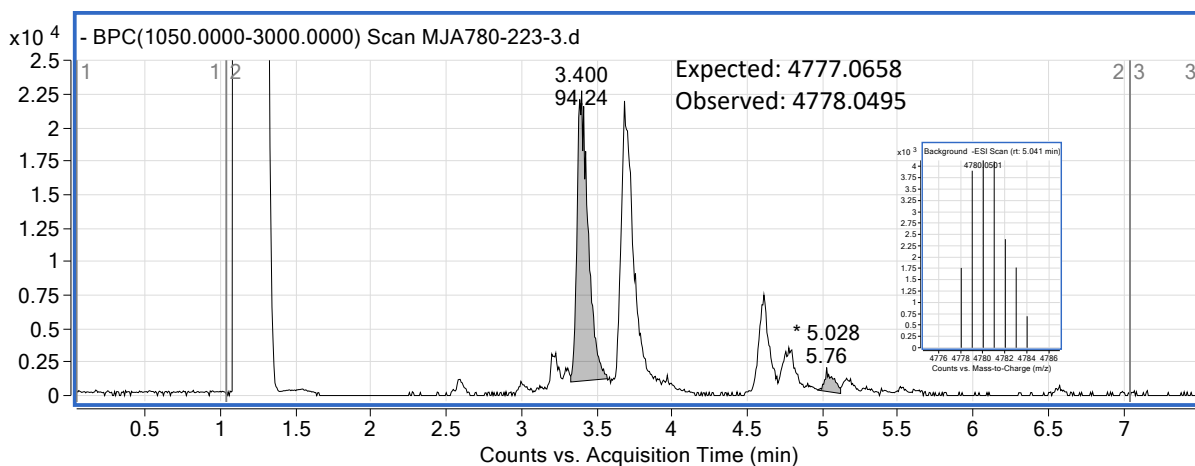

Figure S172: Mass spectrum of DNA-tagged product of reverse amide coupling of HP3 and benzimidamide using Sulfo betaine-16 as the surfactant analysed by DNA mass spectrometry gradient A.

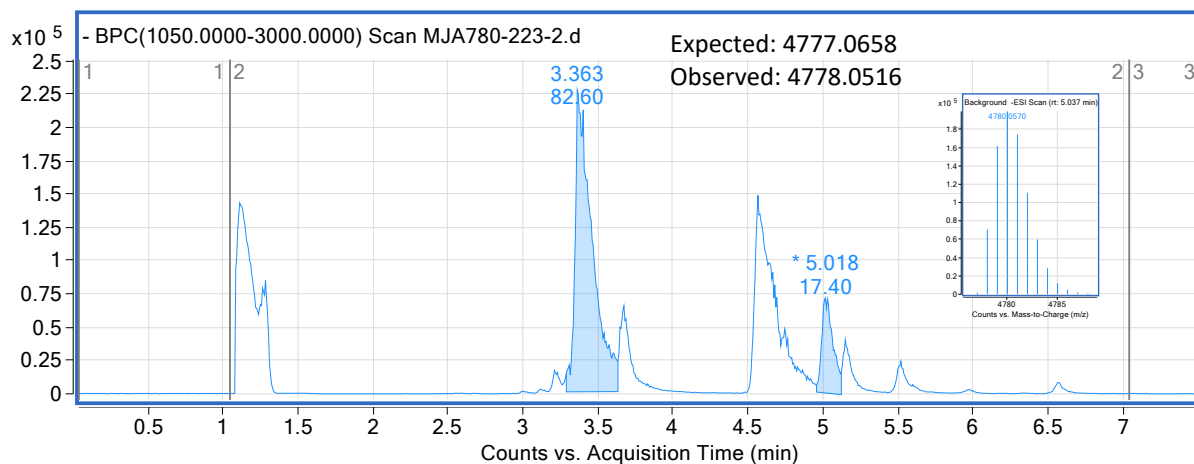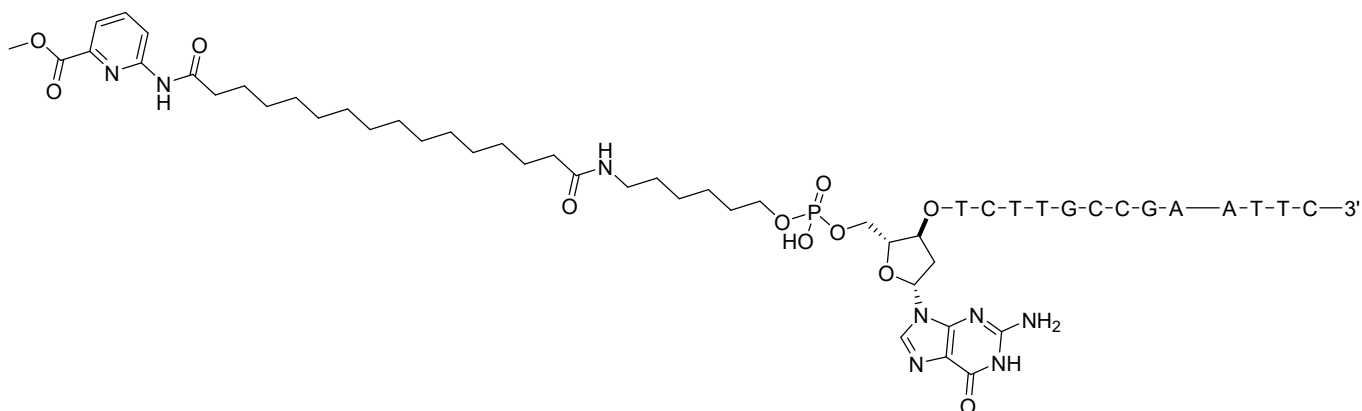

Figure S173: Mass spectrum of DNA-tagged product of reverse amide coupling of HP3 and methyl 6-aminopicolinate using TPGS-750-M as the surfactant analysed by DNA mass spectrometry gradient A.

Expected: 4795.0040 (ester hydrolysis product)  
Observed: 4795.0286

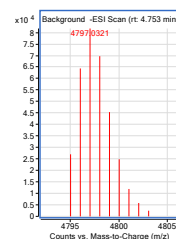

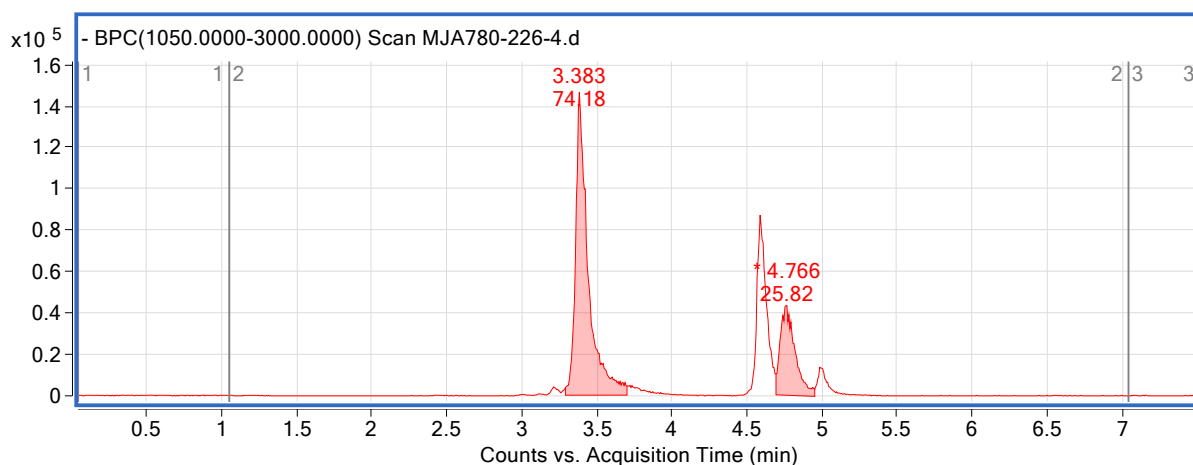

Figure S174: Mass spectrum of DNA-tagged product of reverse amide coupling of HP3 and methyl 6-aminopicolinate using TTAC as the surfactant analysed by DNA mass spectrometry gradient A.

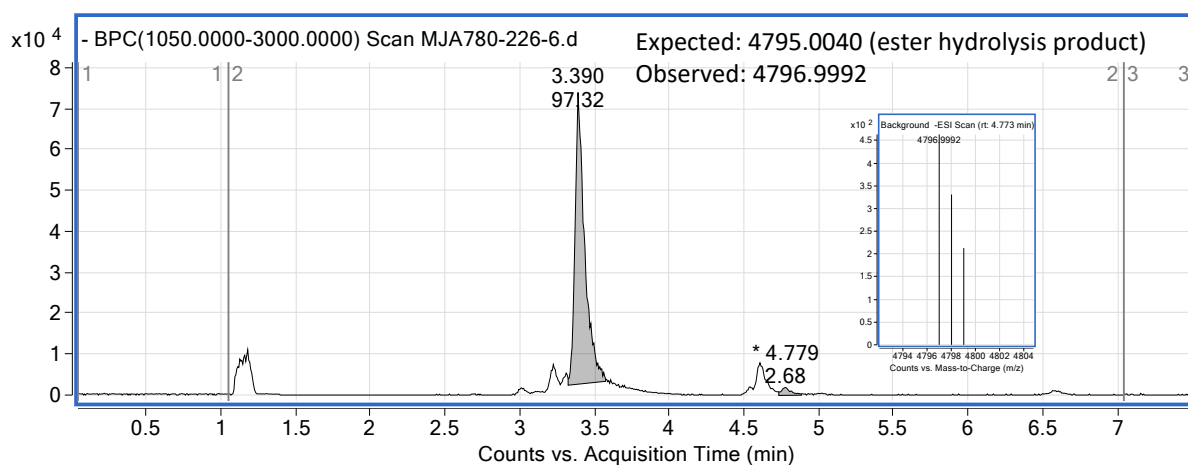

Figure S175: Mass spectrum of DNA-tagged product of reverse amide coupling of HP3 and methyl 6-aminopicolinate using Sulfobetaine-16 as the surfactant analysed by DNA mass spectrometry gradient A.

Expected: 4795.0040 (ester hydrolysis product)  
Observed: 4795.0288

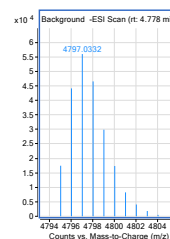

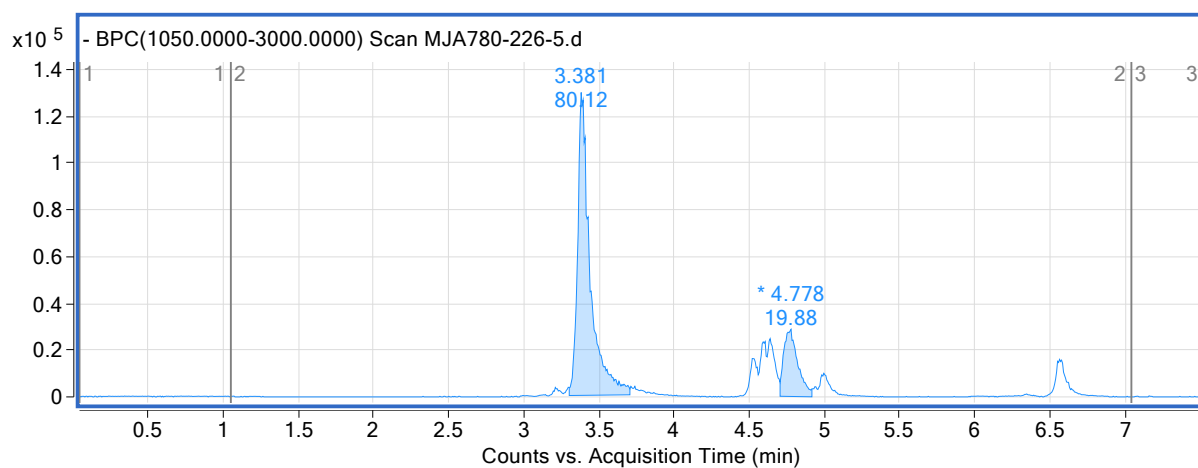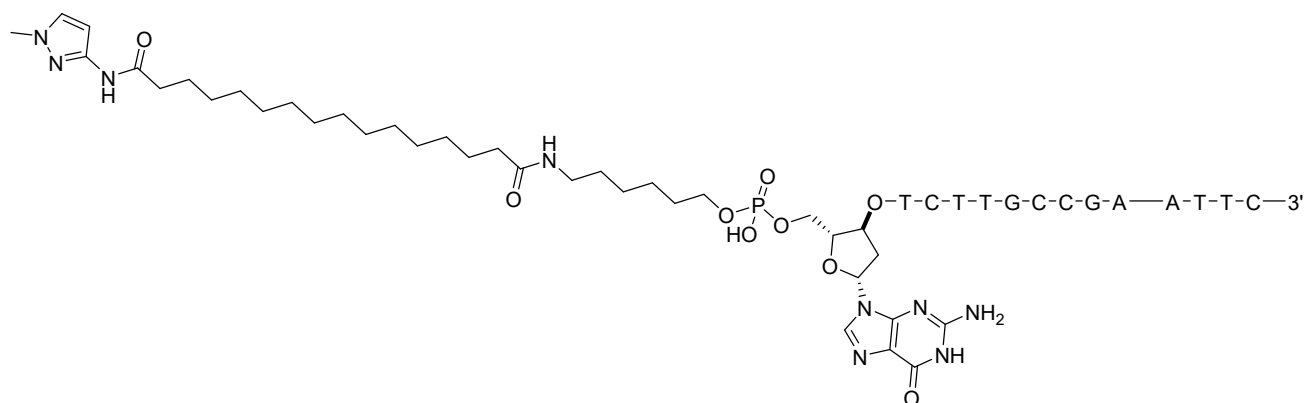

Figure S176: Mass spectrum of DNA-tagged product of reverse amide coupling of HP3 and 1-methyl-1H-pyrazol-3-amine using TPGS-750-M as the surfactant analysed by DNA mass spectrometry gradient A.

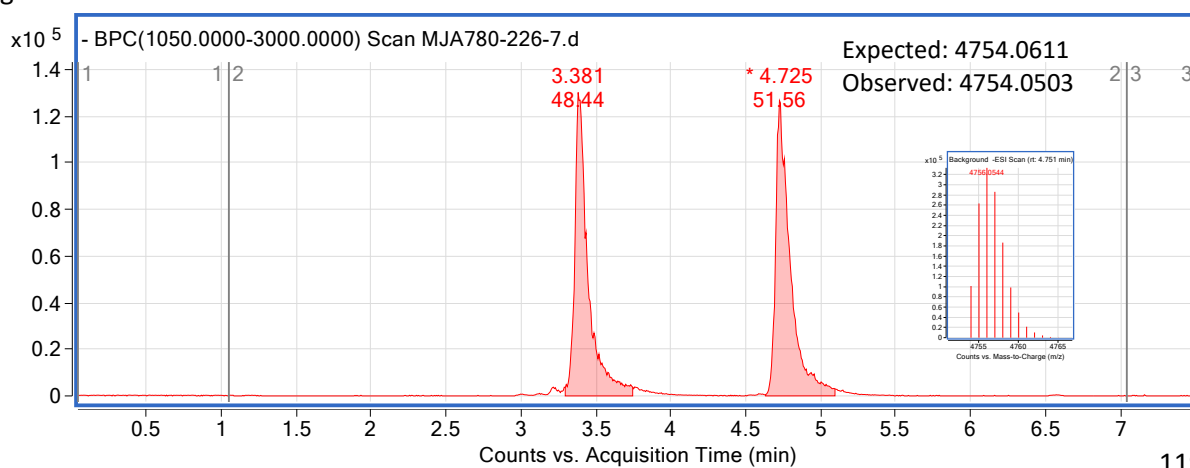

Figure S177: Mass spectrum of DNA-tagged product of reverse amide coupling of HP3 and 1-methyl-1*H*-pyrazol-3-amine using TTAC as the surfactant analysed by DNA mass spectrometry gradient A.

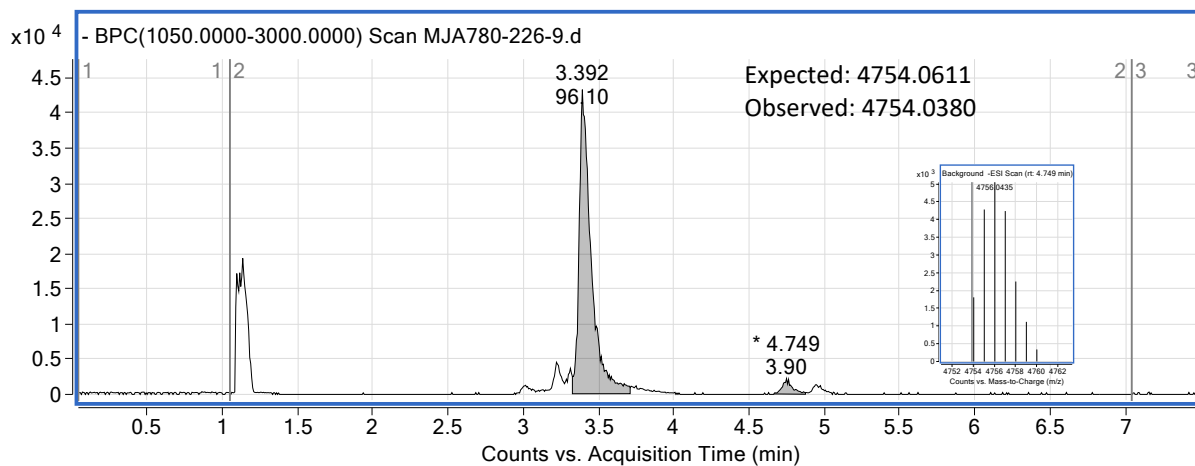

Figure S178: Mass spectrum of DNA-tagged product of reverse amide coupling of HP3 and 1-methyl-1*H*-pyrazol-3-amine using SulfoBetaine-16 as the surfactant analysed by DNA mass spectrometry gradient A.

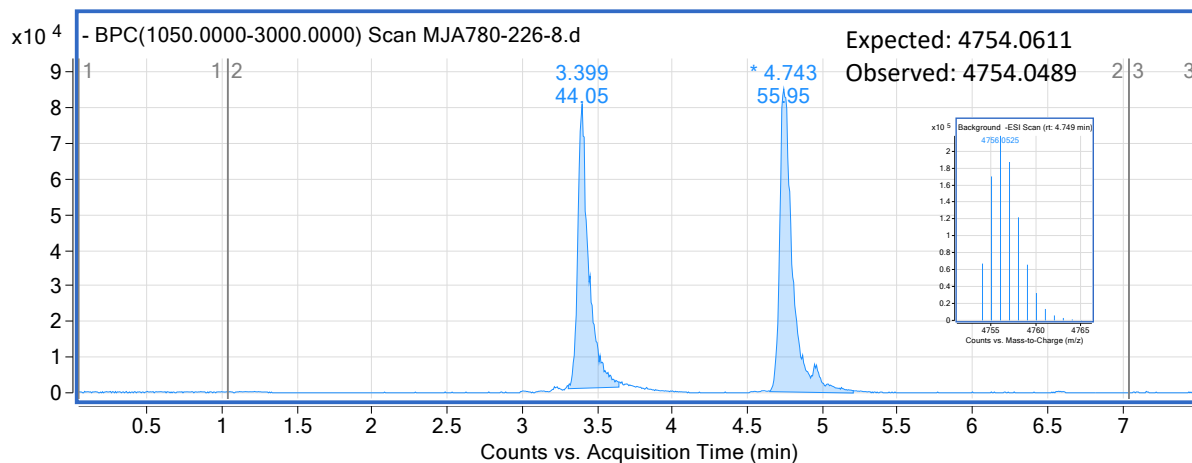

Table 11 Chromatograms



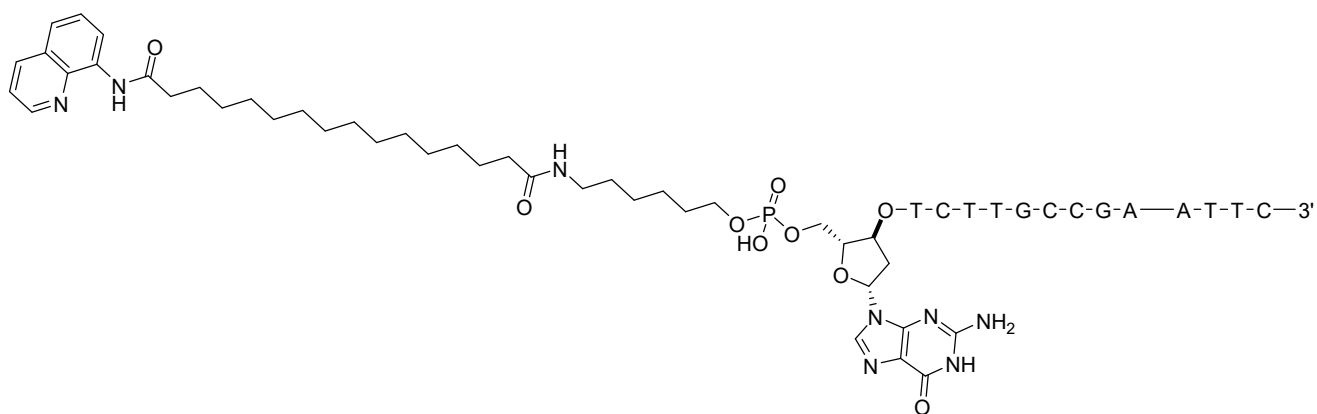

Figure S179: Mass spectrum of DNA-tagged product of reverse amide coupling of HP3 and quinolin-8-amine using TPGS-750-M as the surfactant analysed by DNA mass spectrometry gradient A.

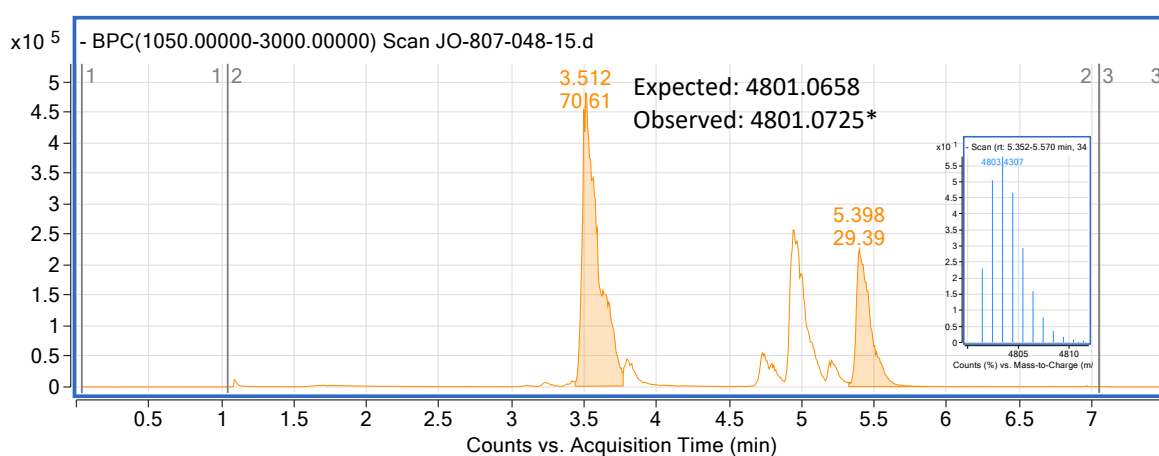

Figure S180: Mass spectrum of DNA-tagged product of reverse amide coupling of HP3 and quinolin-8-amine using Sulfobetaine-16 as the surfactant analysed by DNA mass spectrometry gradient A.

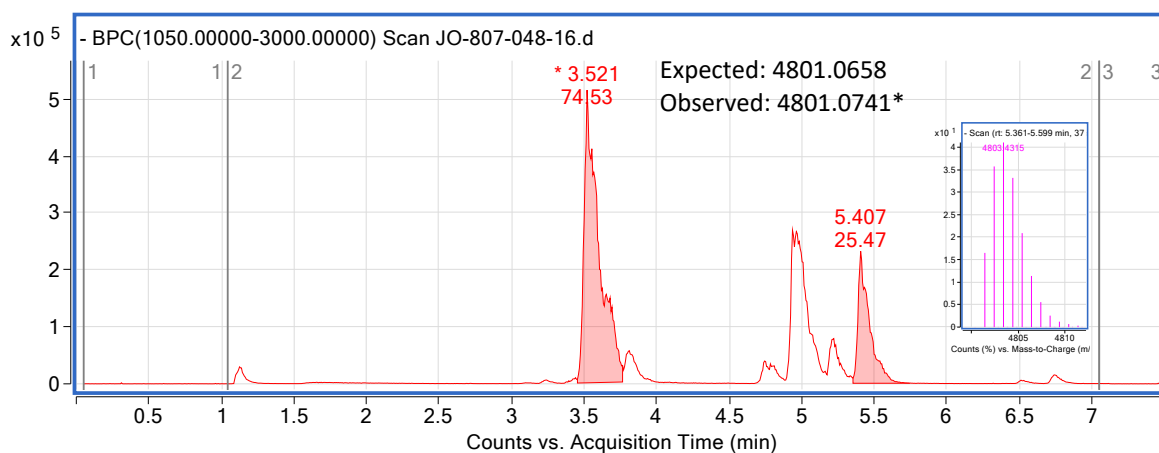

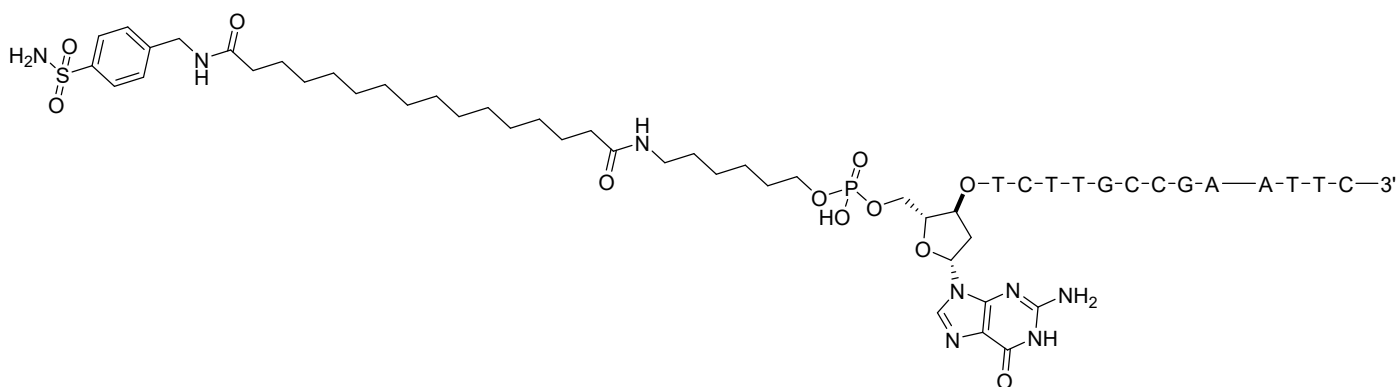

Figure S181: Mass spectrum of DNA-tagged product of reverse amide coupling of HP3 and 4-aminobenzenesulfonamide using TPGS-750-M as the surfactant analysed by DNA mass spectrometry gradient A.

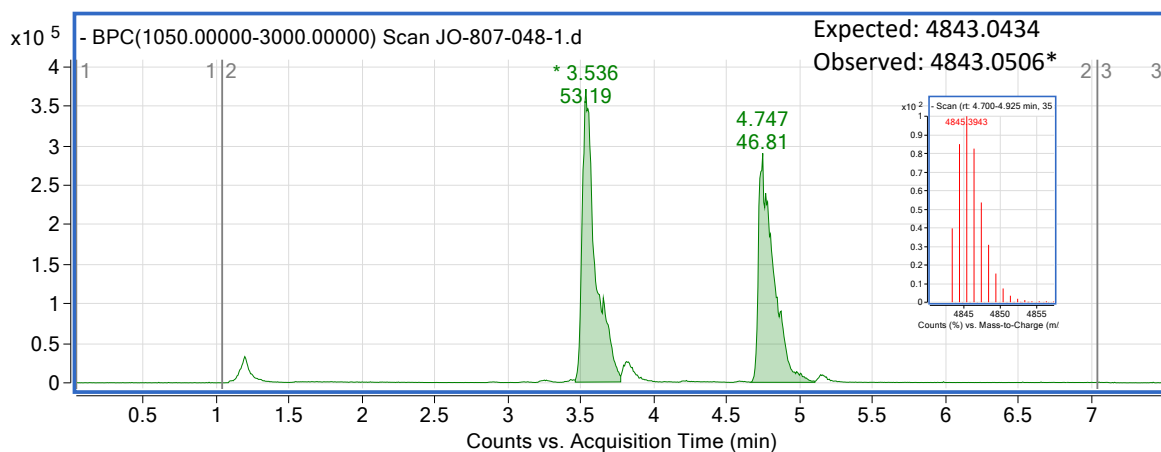

Figure S182: Mass spectrum of DNA-tagged product of reverse amide coupling of HP3 and 4-aminobenzenesulfonamide using Sulfobetaine-16 as the surfactant analysed by DNA mass spectrometry gradient A.

Expected: 4843.0434  
Observed: 4843.0513\*

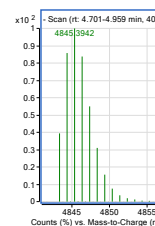

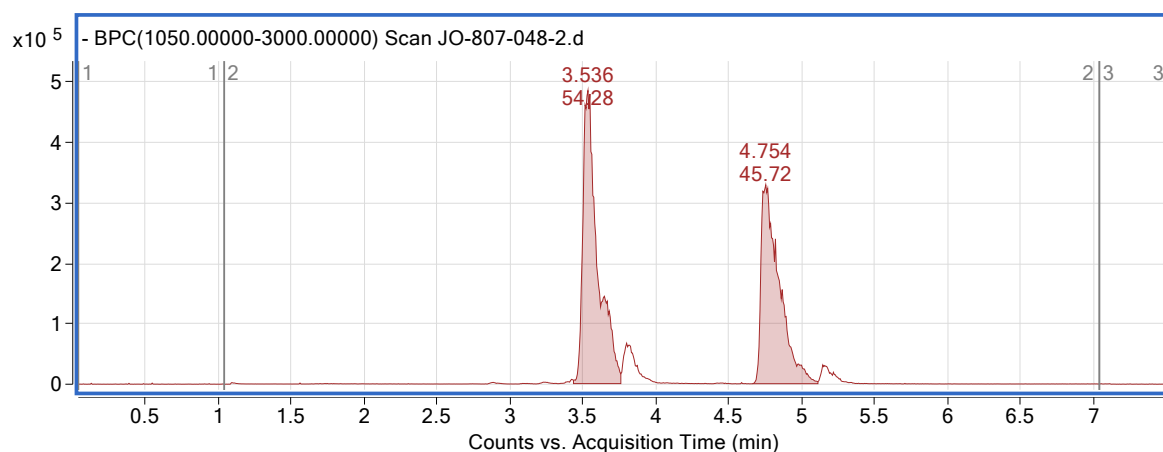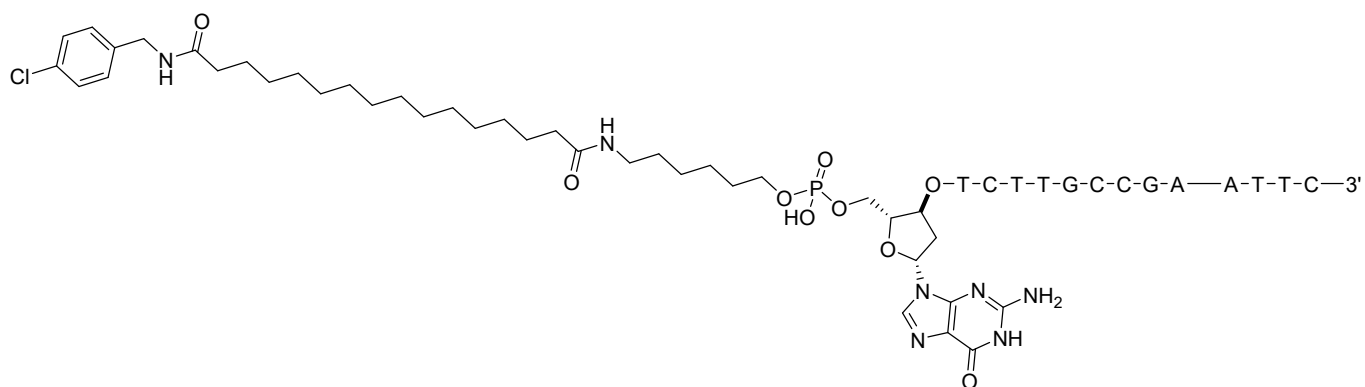

Figure S183: Mass spectrum of DNA-tagged product of reverse amide coupling of HP3 and (4-chlorophenyl)methanamine using TPGS-750-M as the surfactant analysed by DNA mass spectrometry gradient A.

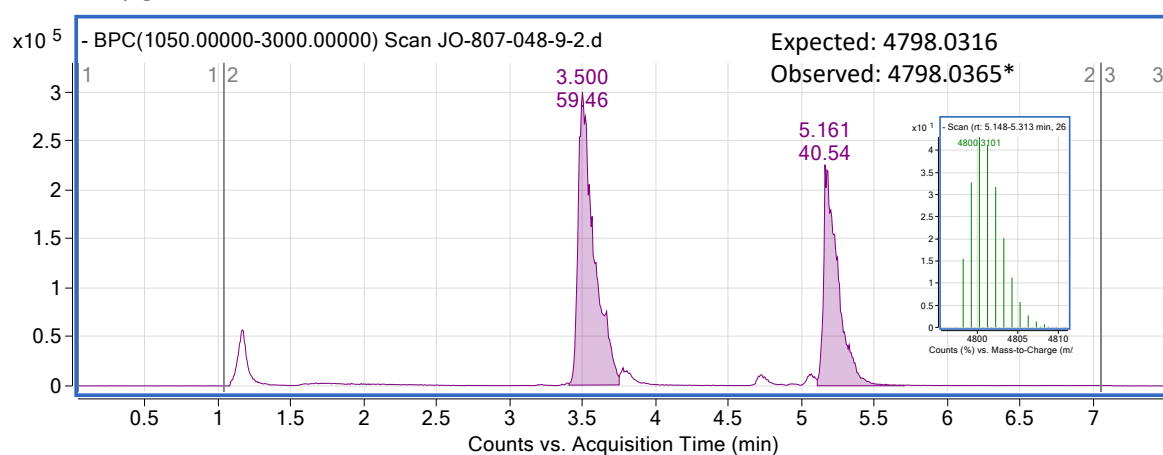

Figure S184: Mass spectrum of DNA-tagged product of reverse amide coupling of HP3 and (4-chlorophenyl)methanamine using Sulfobetaine-16 as the surfactant analysed by DNA mass spectrometry gradient A.

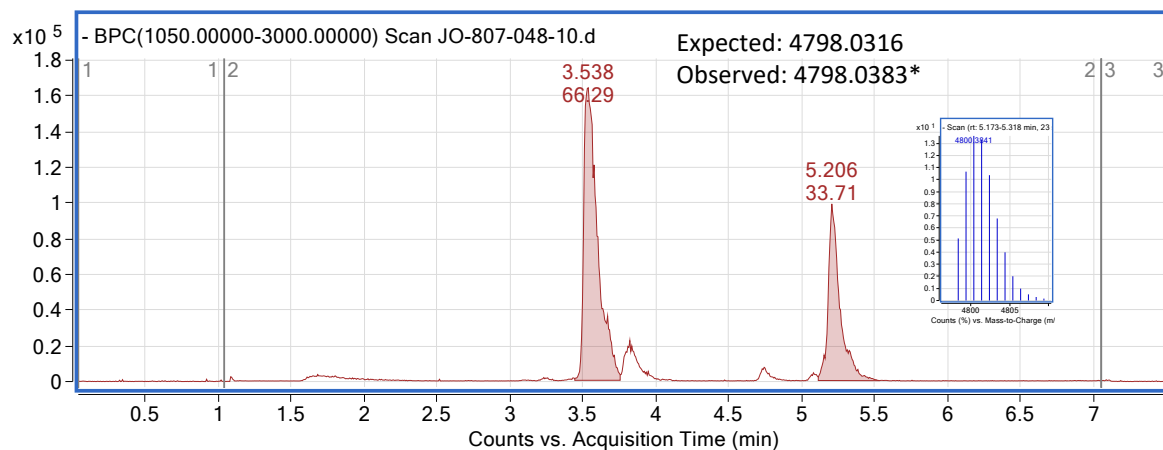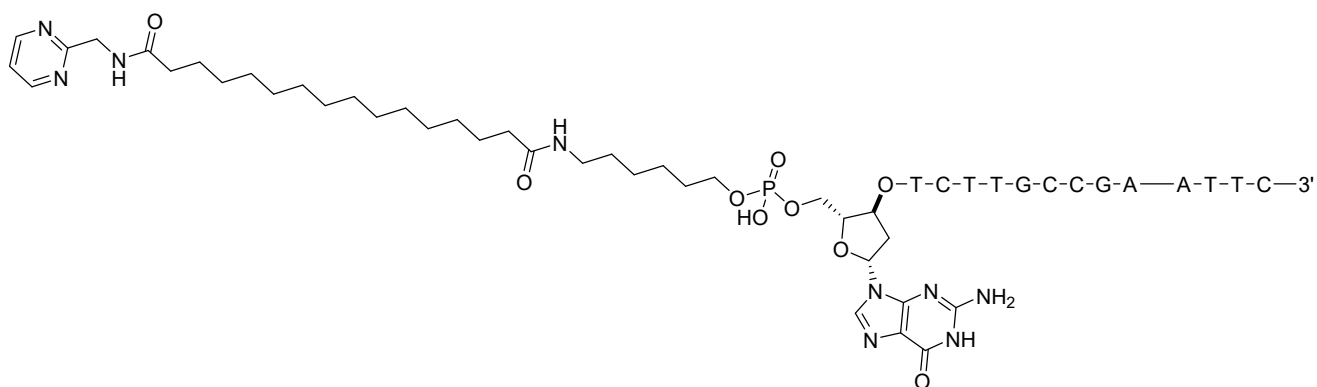

Figure S185: Mass spectrum of DNA-tagged product of reverse amide coupling of HP3 and pyrimidin-2-ylmethanamine using TPGS-750-M as the surfactant analysed by DNA mass spectrometry gradient A.

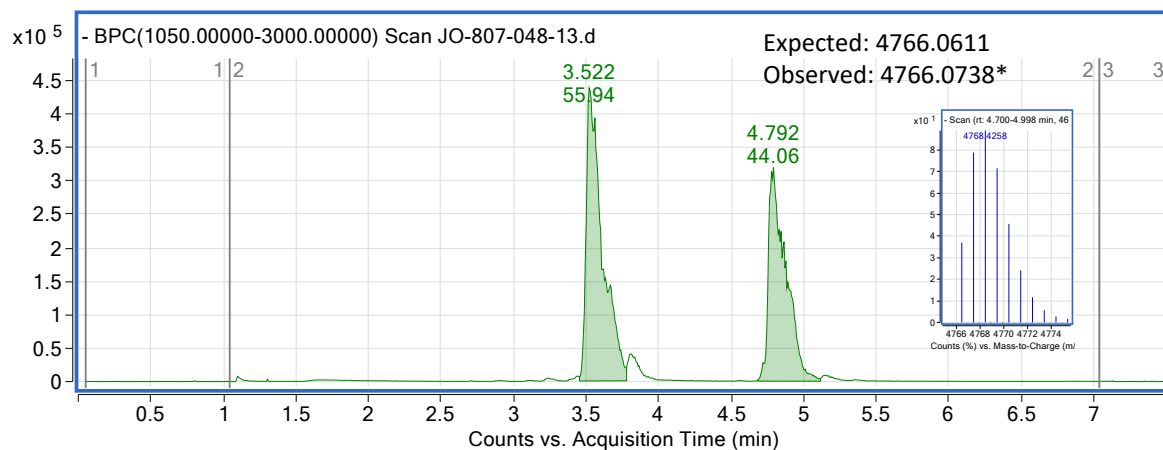

Figure S186: Mass spectrum of DNA-tagged product of reverse amide coupling of HP3 and pyrimidin-2-ylmethanamine using Sulfobetaine-16 as the surfactant analysed by DNA mass spectrometry gradient A.

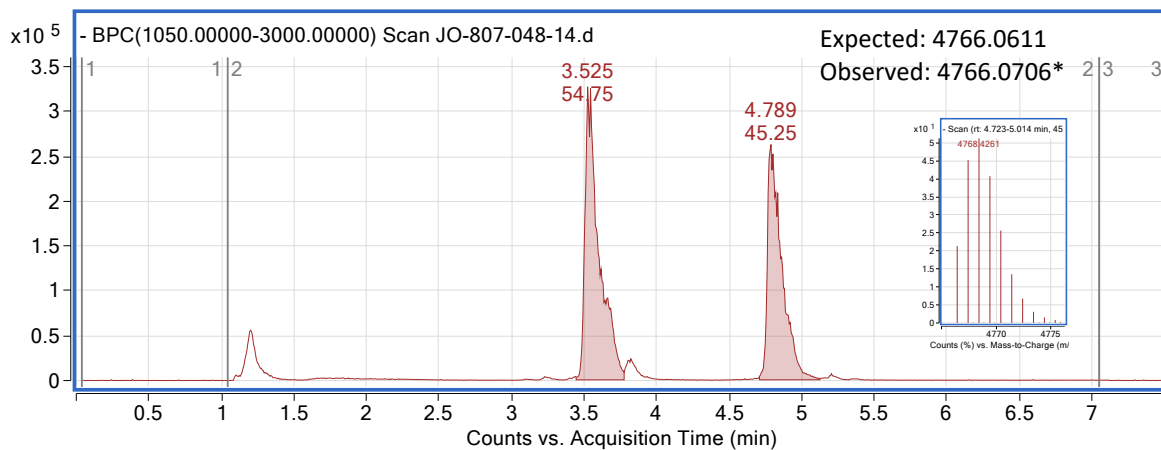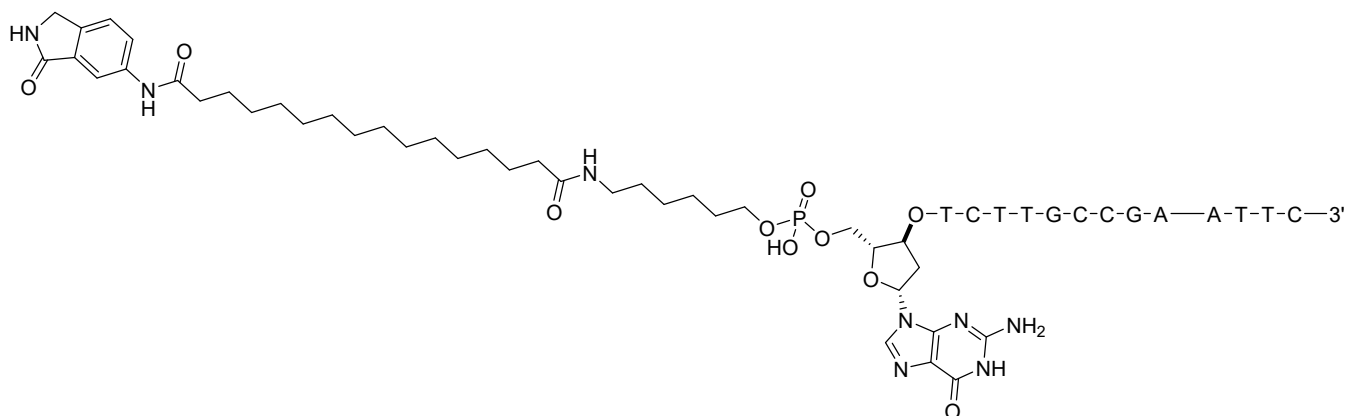

Figure S187: Mass spectrum of DNA-tagged product of reverse amide coupling of HP3 and 6-aminoisindolin-1-one using TPGS-750-M as the surfactant analysed by DNA mass spectrometry gradient A.

Expected: 4805.0608  
Observed: 4805.0675\*

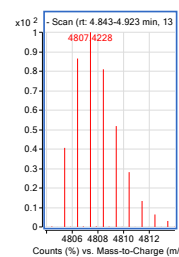

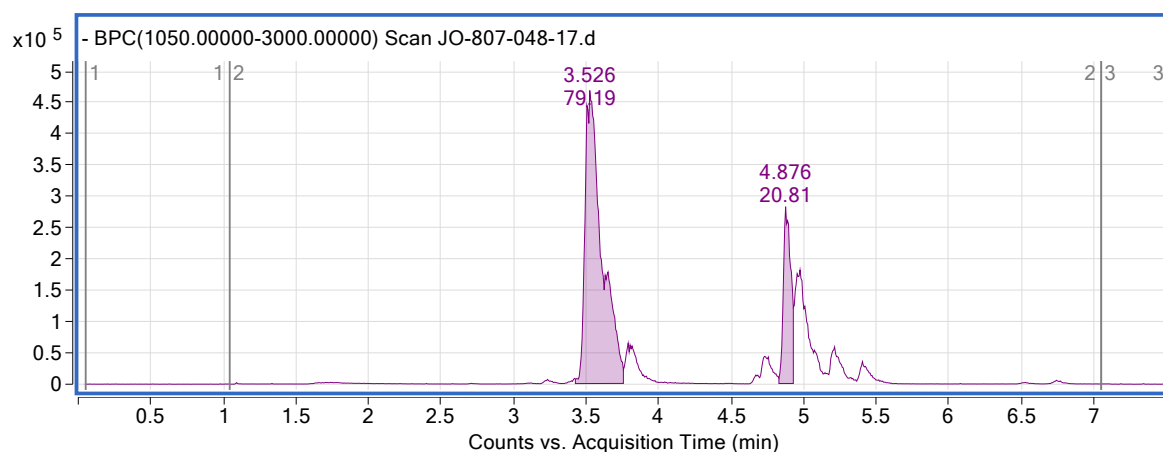

Figure S188: Mass spectrum of DNA-tagged product of reverse amide coupling of HP3 and 6-aminoisindolin-1-one using SulfoBetaine-16 as the surfactant analysed by DNA mass spectrometry gradient A.

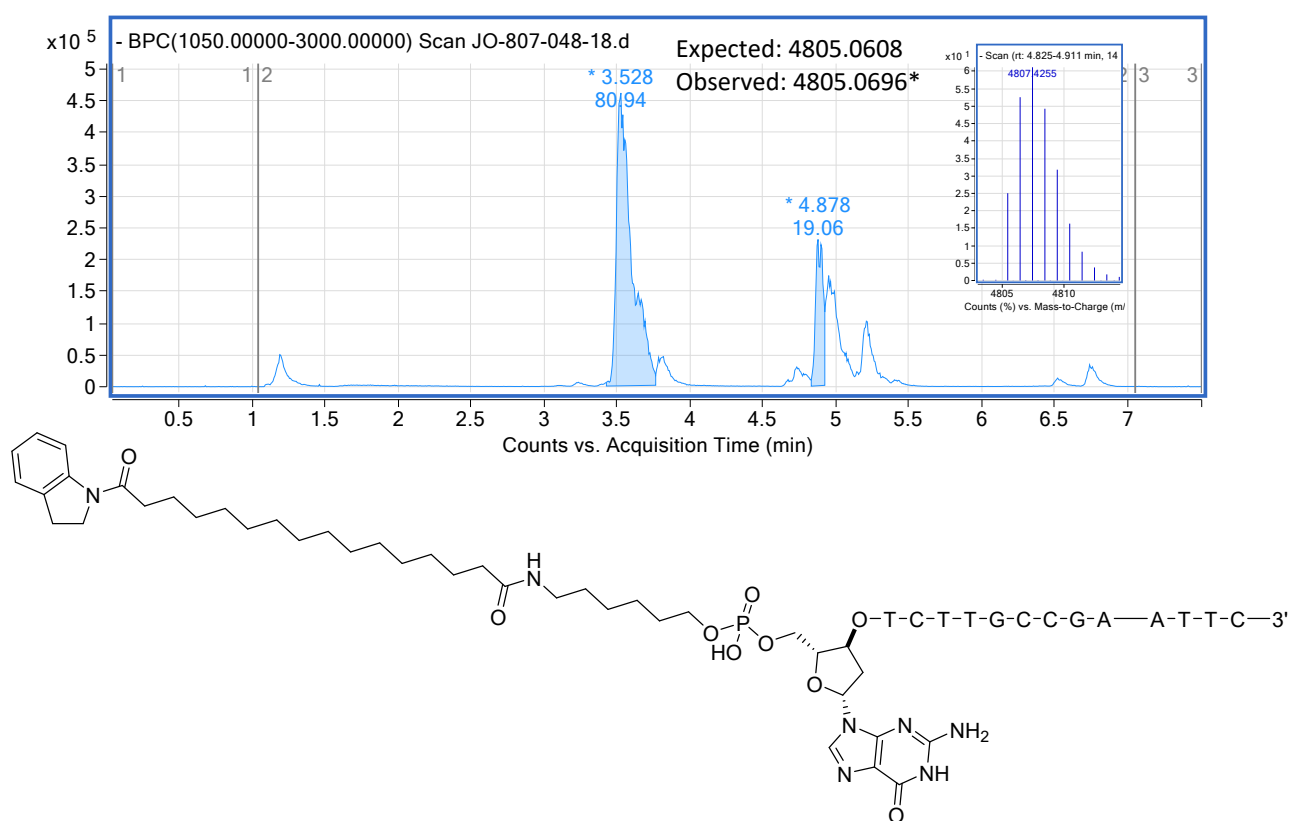

Figure S189: Mass spectrum of DNA-tagged product of reverse amide coupling of HP3 and indoline using TPGS-750-M as the surfactant analysed by DNA mass spectrometry gradient A.

Expected: 4776.0706  
Observed: 4776.1514\*

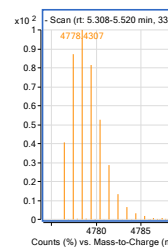

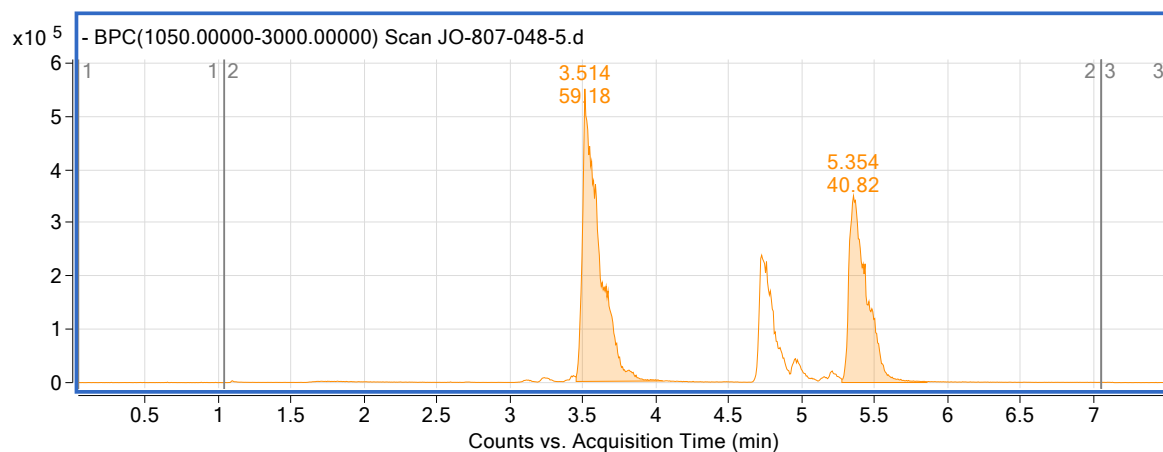

Figure S190: Mass spectrum of DNA-tagged product of reverse amide coupling of HP3 and indoline using Sulfobetaine-16 as the surfactant analysed by DNA mass spectrometry gradient A.

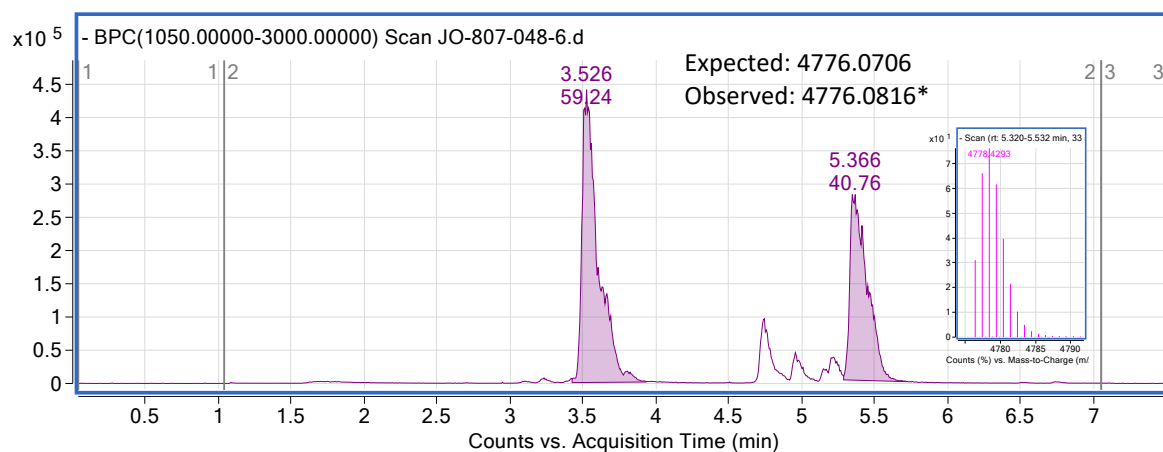

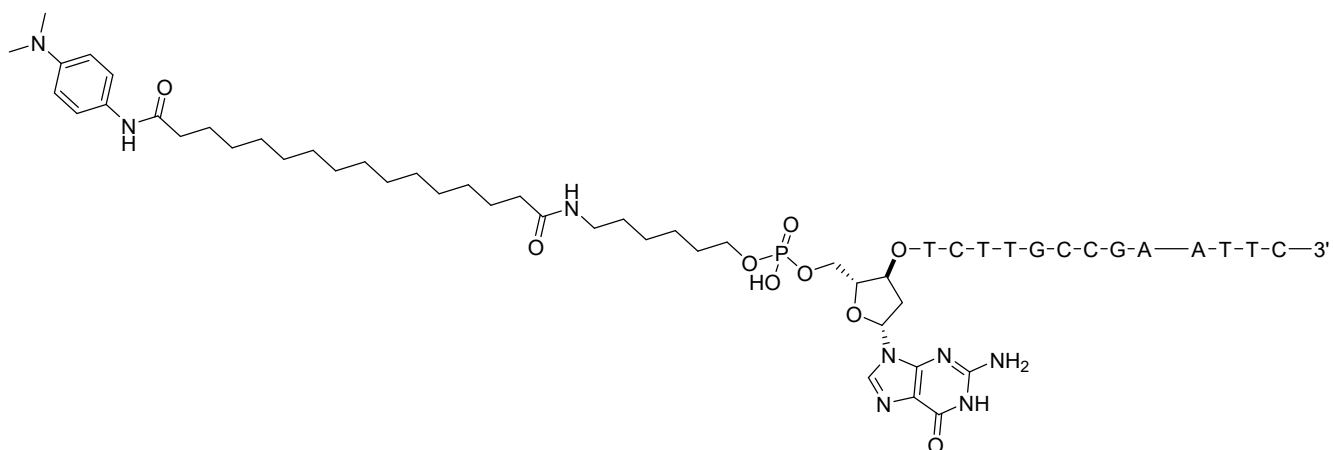

Figure S191: Mass spectrum of DNA-tagged product of reverse amide coupling of HP3 and *N,N'*-dimethylbenzene-1,4-diamine using TPGS-750-M as the surfactant analysed by DNA mass spectrometry gradient A.

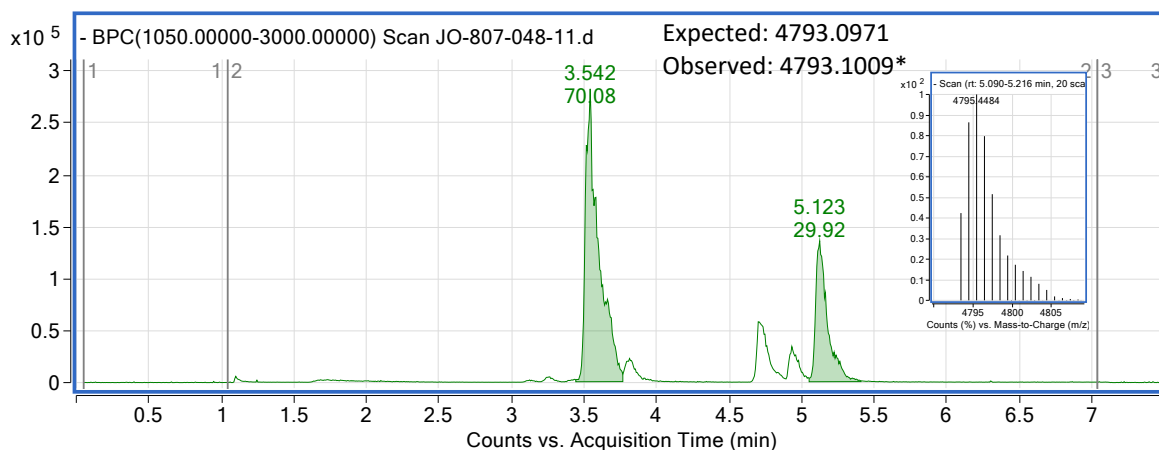

Figure S192: Mass spectrum of DNA-tagged product of reverse amide coupling of HP3 and *N,N'*-dimethylbenzene-1,4-diamine using Sulfo betaine-16 as the surfactant analysed by DNA mass spectrometry gradient A.

Expected: 4793.0971  
Observed: 4793.1060\*

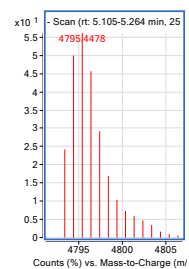



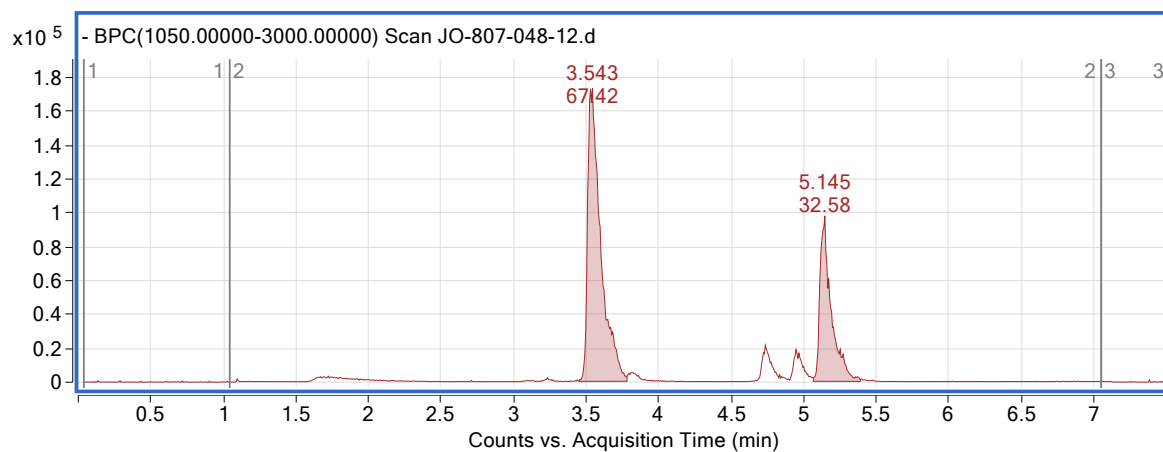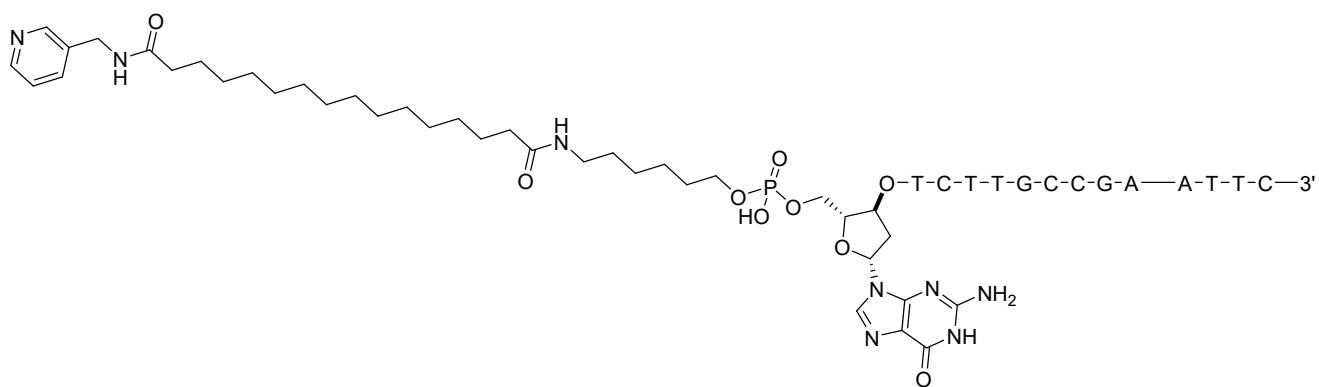

Figure S193: Mass spectrum of DNA-tagged product of reverse amide coupling of HP3 and pyridin-3-ylmethanamine using TPGS-750-M as the surfactant analysed by DNA mass spectrometry gradient A.

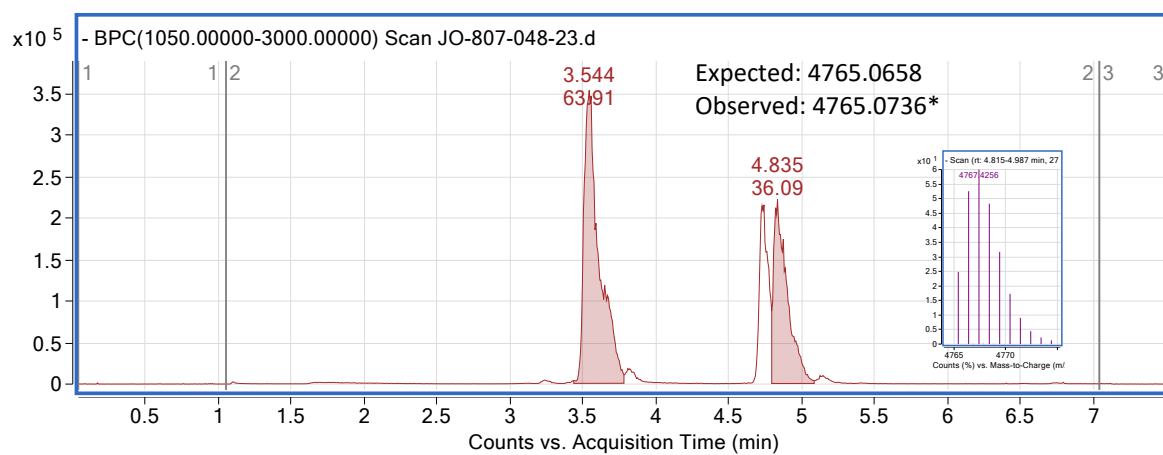

Figure S194: Mass spectrum of DNA-tagged product of reverse amide coupling of HP3 and pyridin-3-ylmethanamine using Sulfobetaine-16 as the surfactant analysed by DNA mass spectrometry gradient A.

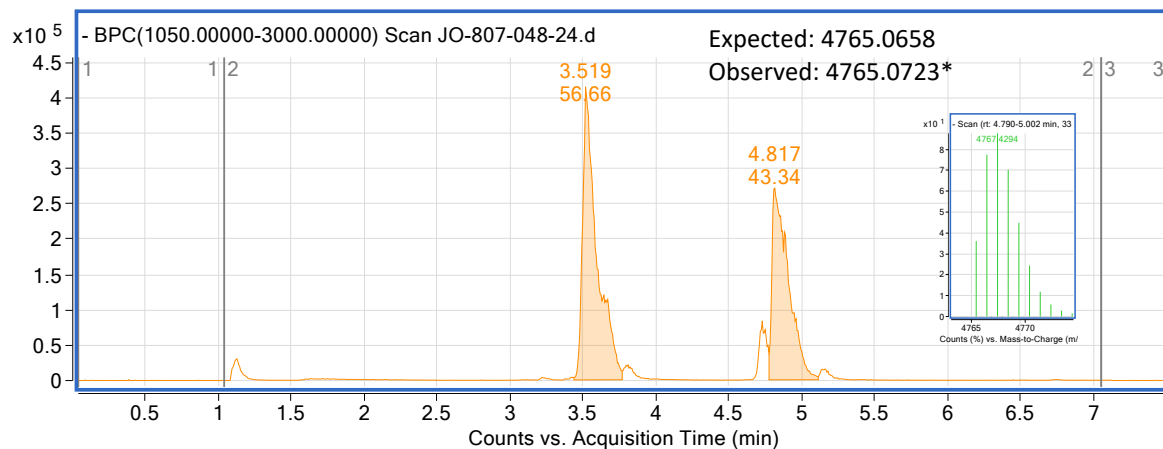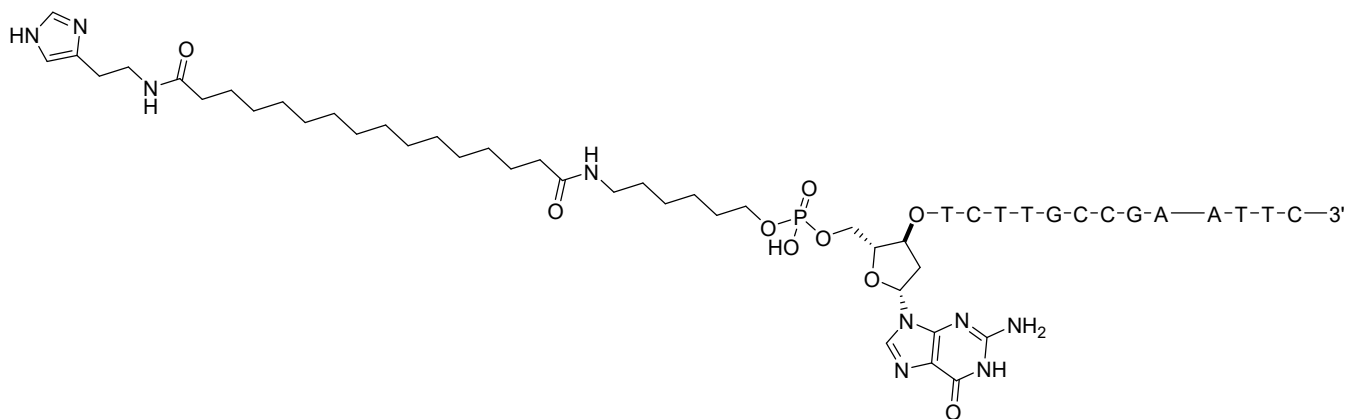

Figure S195: Mass spectrum of DNA-tagged product of reverse amide coupling of HP3 and 2-(1H-imidazol-4-yl)ethan-1-amine using TPGS-750-M as the surfactant analysed by DNA mass spectrometry gradient A.

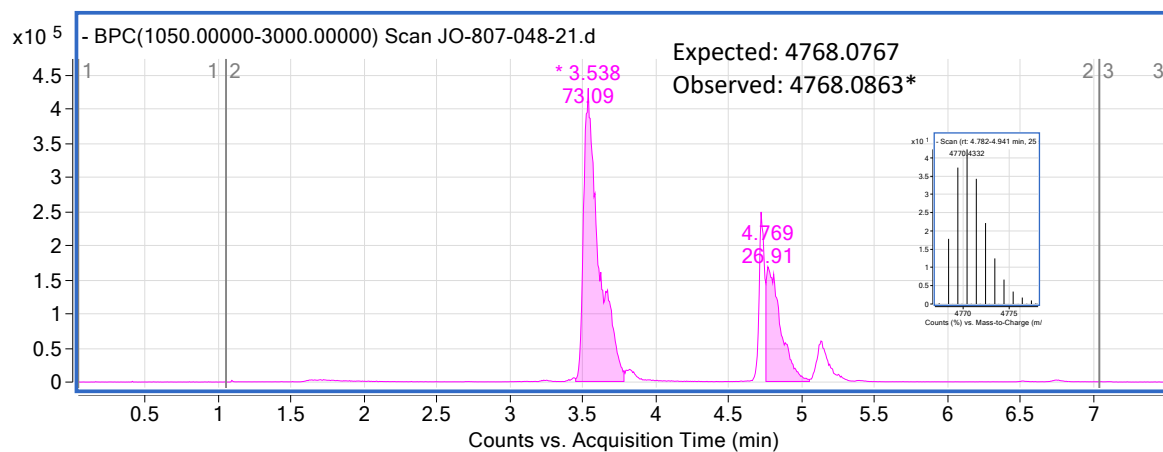

Figure S196: Mass spectrum of DNA-tagged product of reverse amide coupling of HP3 and 2-(1*H*-imidazol-4-yl)ethan-1-amine using Sulfobetaine-16 as the surfactant analysed by DNA mass spectrometry gradient A.

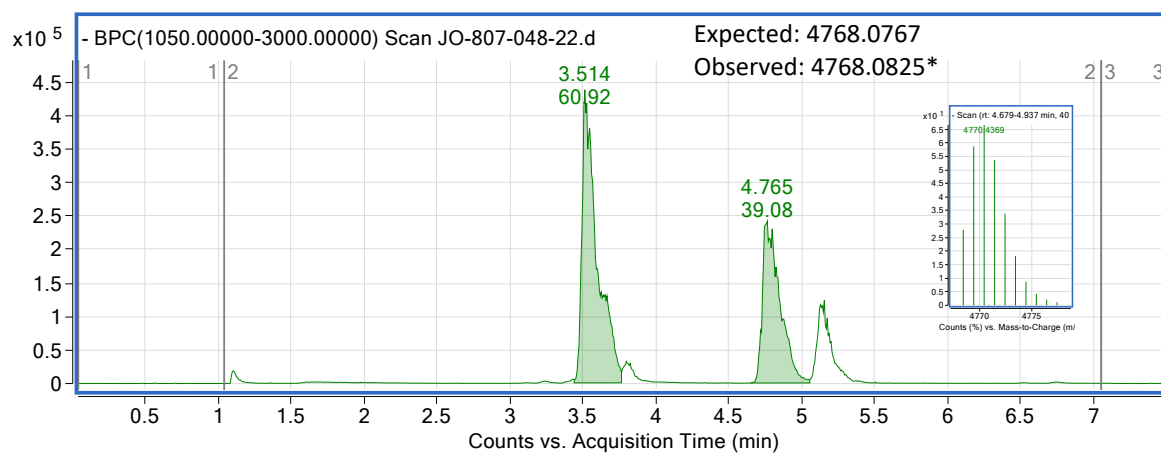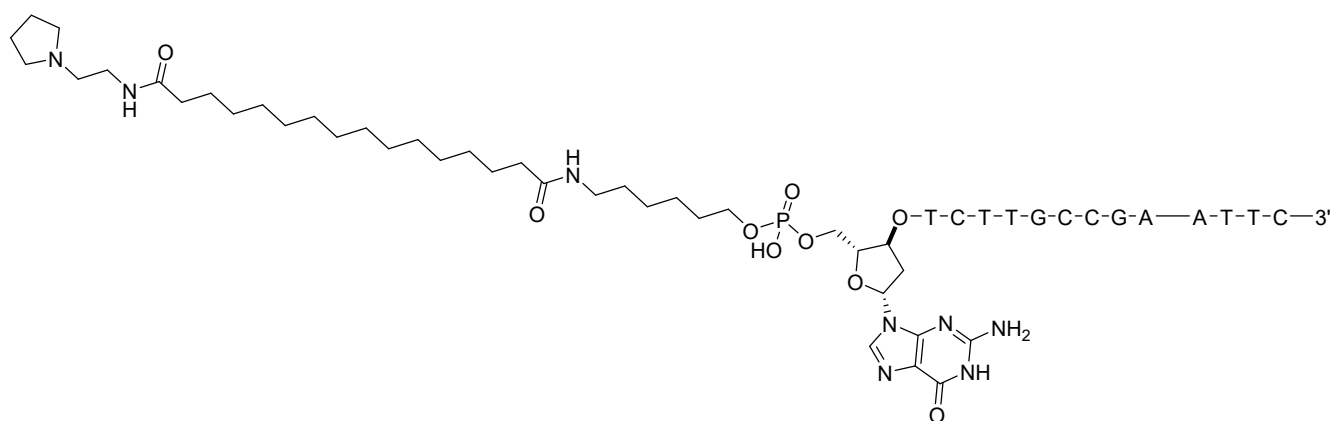

Figure S197: Mass spectrum of DNA-tagged product of reverse amide coupling of HP3 and 2-(pyrrolidin-1-yl)ethan-1-amine using TPGS-750-M as the surfactant analysed by DNA mass spectrometry gradient A.

Expected: 4771.1128  
Observed: 4771.1123\*

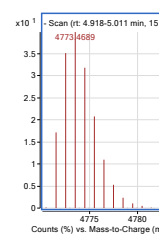

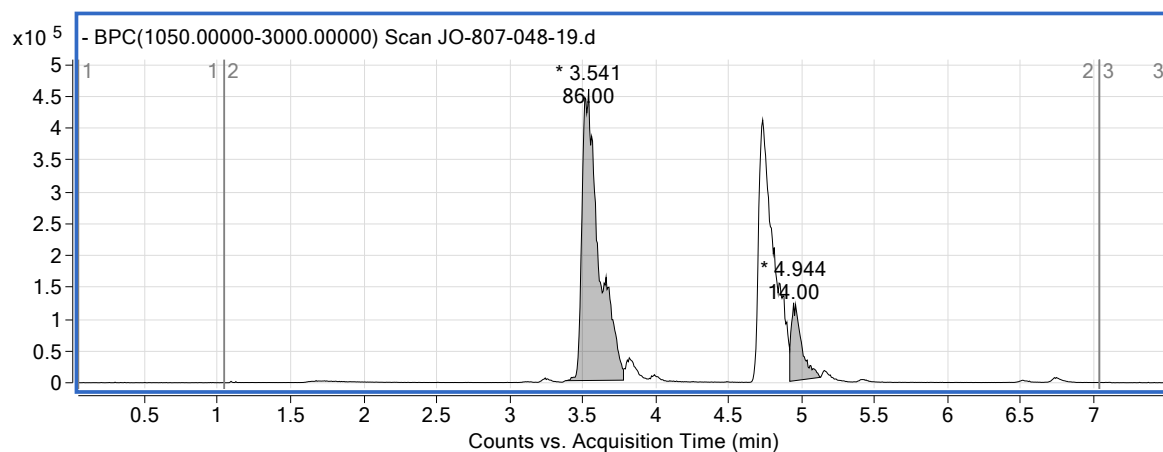

Figure S198: Mass spectrum of DNA-tagged product of reverse amide coupling of HP3 and 2-(pyrrolidin-1-yl)ethan-1-amine using SulfoBetaine-16 as the surfactant analysed by DNA mass spectrometry gradient A.

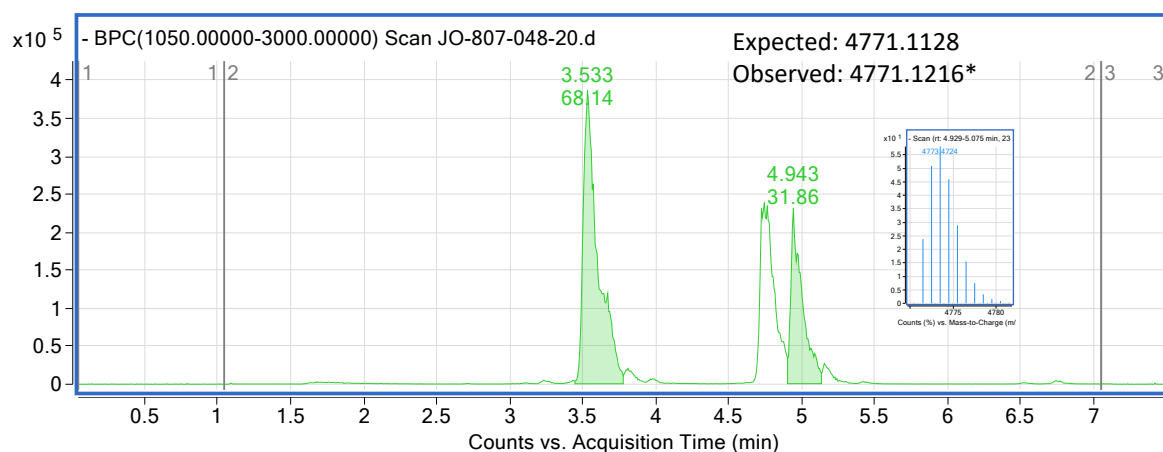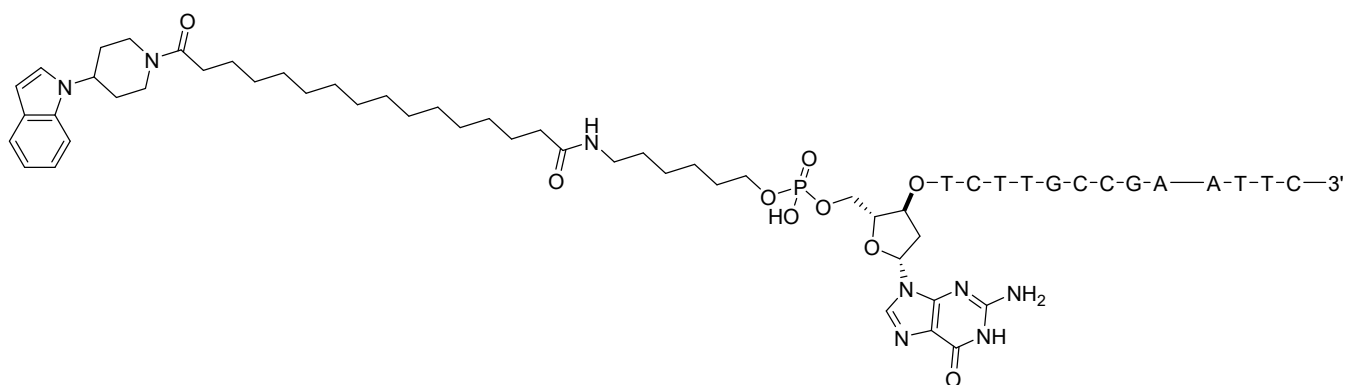

Figure S199: Mass spectrum of DNA-tagged product of reverse amide coupling of HP3 and 1-(piperidin-4-yl)-1*H*-indole using TPGS-750-M as the surfactant analysed by DNA mass spectrometry gradient A.

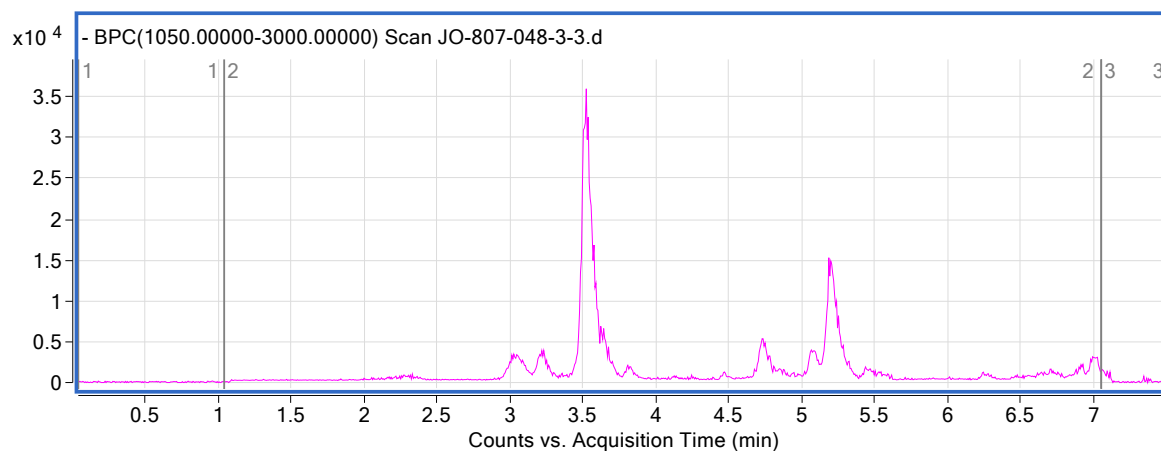

Figure S200: Mass spectrum of DNA-tagged product of reverse amide coupling of HP3 and 1-(piperidin-4-yl)-1*H*-indole using Sulfo betaine-16 as the surfactant analysed by DNA mass spectrometry gradient A.

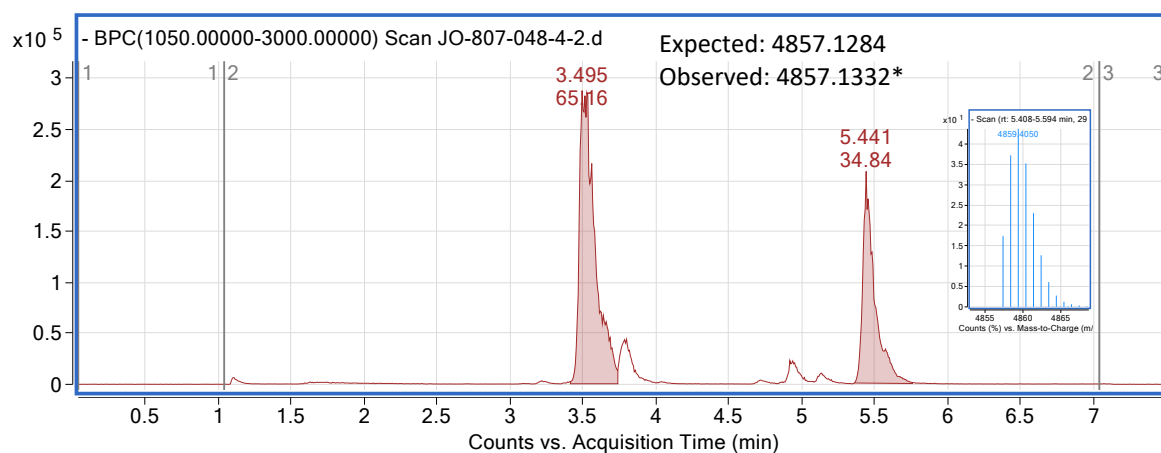

## Representative Encoded Compound Synthesis

### Experimental Procedure and Characterisation of compounds **7-10**:



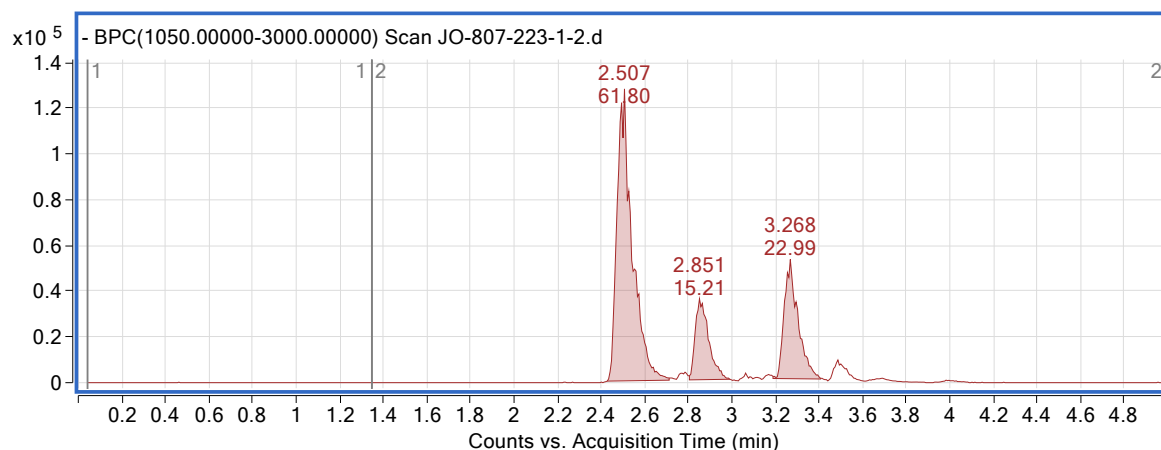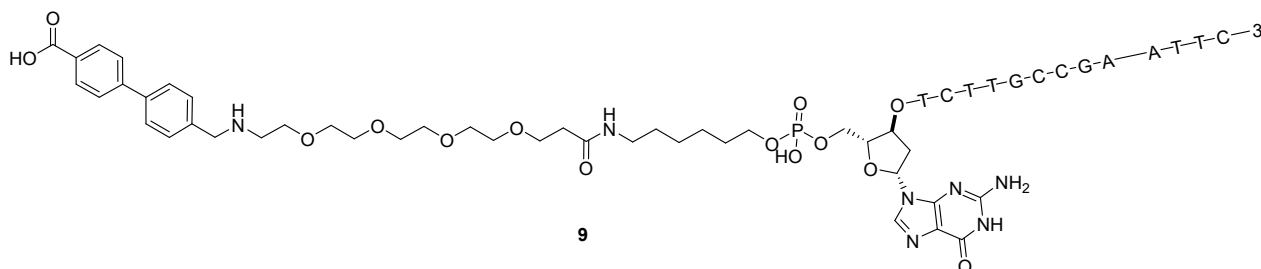

To a 1.5 mL Eppendorf™ Polypropylene DNA LoBind Tube was added compound **8** (2 nmol in 50  $\mu$ L  $H_2O$ ) and LiOH (0.5 M in  $H_2O$ , 50  $\mu$ L) and the reaction mixture vortexed at room temperature at 800 rpm for 30 mins. The product was added to an Amicon Ultra-0.5 Centrifugal 3 kDa Cut-off Filter Unit, DEPC-treated water (350  $\mu$ L was added and the solution centrifuged at room temperature for 10 mins. DEPC-treated water (200  $\mu$ L) was added to the filter and the mixture centrifuged at room temperature for 10 mins. This was repeated 2 more times, then the filter was inverted and centrifuged at 4,300 rpm at room temperature for 2 mins to yield the aqueous DNA product **9** which was analysed by mass spectrometry.

Figure S203: Mass spectrum of product **9** analysed by DNA mass spectrometry method A.

Expected (acid): 4864.0139  
Observed: 4864.0363

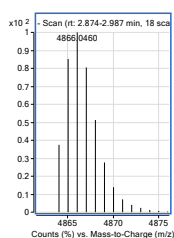

Expected (ester): 4892.0452  
Observed: 4892.0571

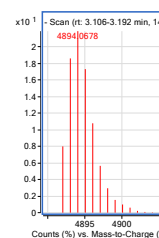

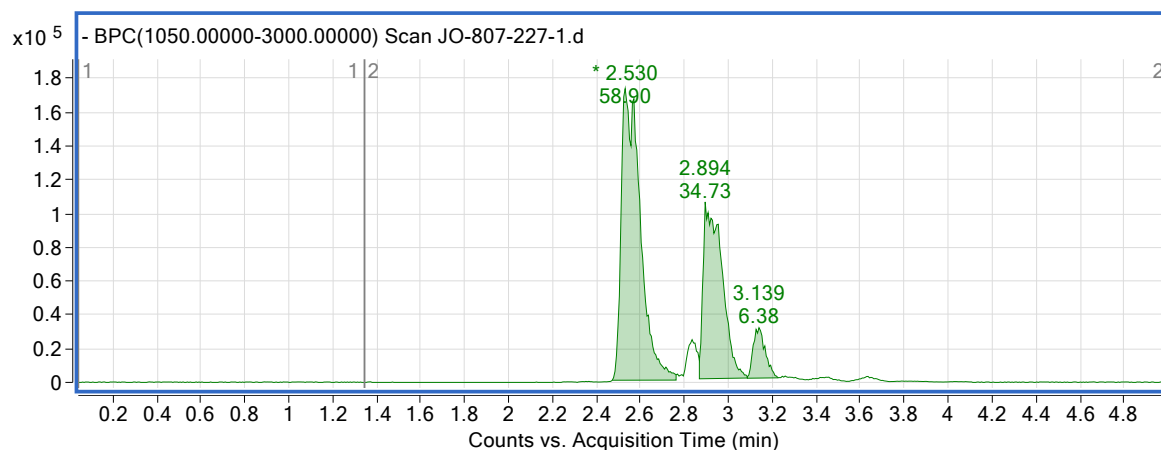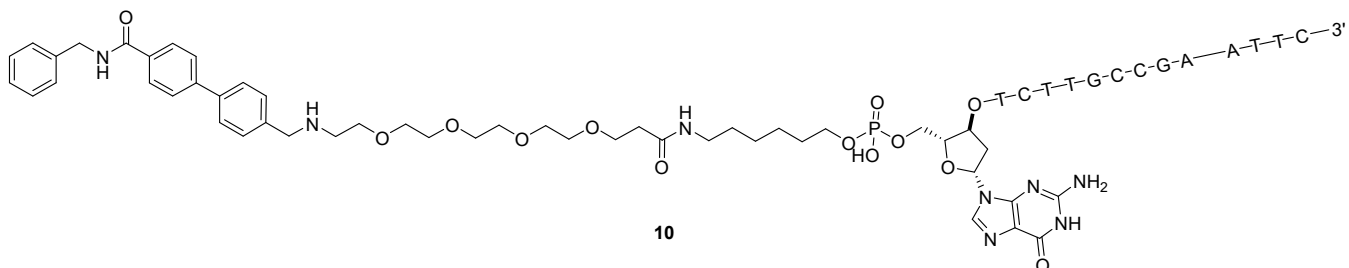

Compound **10** was synthesised from compound **9** and benzylamine according to the general on-DNA reverse amide coupling procedure.

Figure S204: Mass spectrum of product **10** from the reaction of **9** with benzylamine using sulfobetaine-16 as the surfactant analysed by DNA mass spectrometry gradient A.

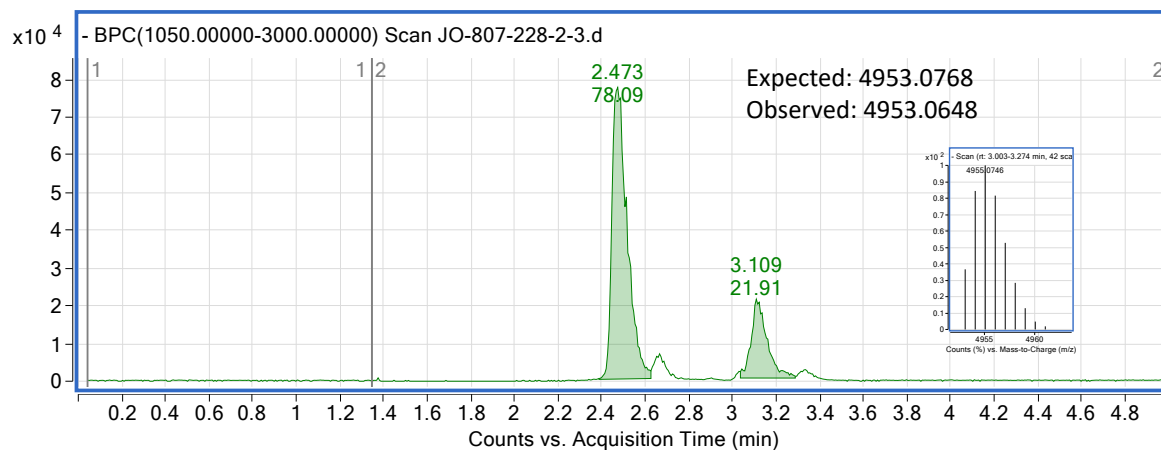



## 1x1x1 Library Synthesis

Figure S205: Synthetic scheme for the synthesis of a 1x1x1 library incorporating all 3 reactions.

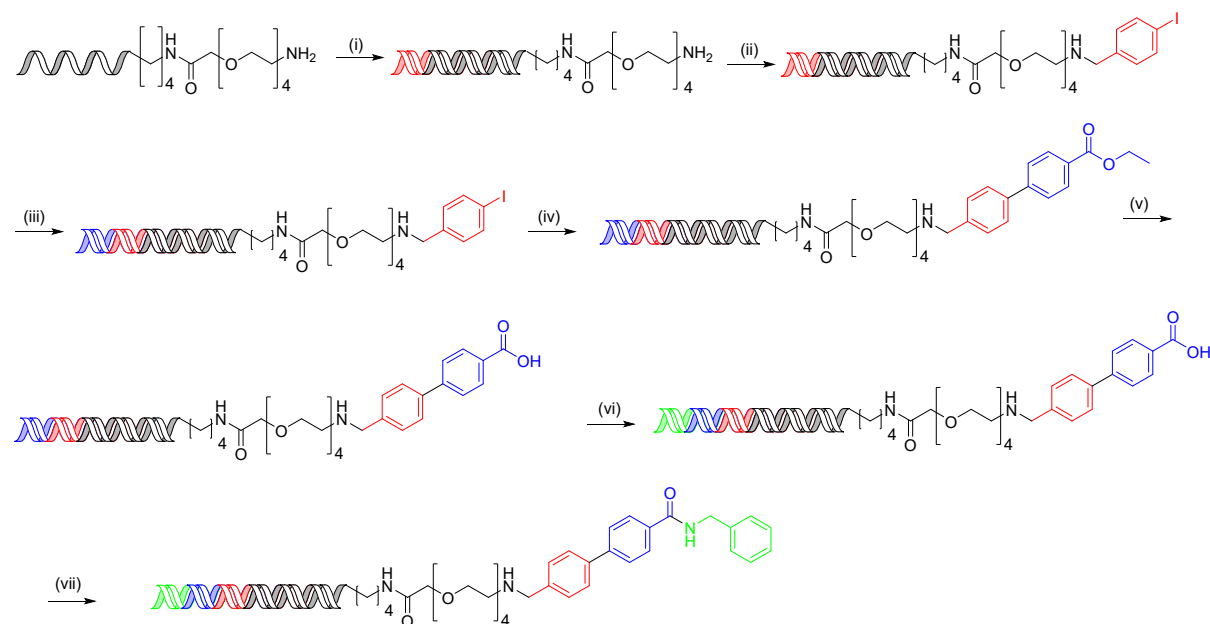

Conditions: (i) first ligation (DNA headpiece, primer, library codon and first DNA building block); (ii) borate buffer (350 mM, pH=10.8), aldehyde (400 mM), 5% surfactant, rt, 1.5 h then NaBH<sub>4</sub> (440 mM), rt 16 h; (iii) second ligation (second DNA building block); (iv) boronate (500 mM), Pd(dtbpf)Cl<sub>2</sub> (7.3 mM), K<sub>3</sub>PO<sub>4</sub> (530 mM), 2% surfactant, 15% THF, 60 °C, 5 h; (v) LiOH (250 mM), rt, 30 mins; (vi) third ligation (third DNA building block); (vii) amine (0.5 M), HOAt (0.5 M), lutidine (1.5 M), DIC (0.5 M), 4.5% surfactant, 45 °C, 3 h.

The following code abbreviations for each DNA section have been used:

| Code | Function                            | Sequence (5'-3')     |
|------|-------------------------------------|----------------------|
| A    | Adapter – 5' amino-linked headpiece | GTCTTGCCGAATTC       |
| A'   | Complementary adapter               | GAATTCGGCAAGAC       |
| P    | Primer                              | AGGTCGGTGTGAACGATTG  |
| P'   | Complementary primer                | CAAATCCGTTACACCGACCT |
| L    | Library codon                       | AGTCGCGGAA           |
| L'   | Complementary library codon         | TTCCGCGACT           |
| OH1  | Ligation overhang 1                 | GTAT                 |
| OH1' | Complementary overhang 1            | ATAC                 |
| BB1  | Building block 1                    | AGTGCATTCA           |
| BB1' | Complementary building block 1      | TGAATGCACT           |
| OH2  | Ligation overhang 2                 | CCTA                 |
| OH2' | Complementary overhang 2            | TAGG                 |
| BB2  | Building block 2                    | CCGCTAGGCT           |
| BB2' | Complementary building block 2      | AGCCTAGCGG           |
| OH3  | Ligation overhang 3                 | TACG                 |
| OH3' | Complementary overhang 3            | CGTA                 |

|      |                                |                             |
|------|--------------------------------|-----------------------------|
| BB3  | Building block 3               | GAGGTCTTAC                  |
| BB3' | Complementary building block 3 | GTAAGACCTC                  |
| P2   | Complementary to P2'           | TGACCTCAACTACATGGTCTACA     |
| P2'  | Primer (reverse)               | TGTAGACCATGTAGTTGAGGTC<br>A |

Ligation Strategy:

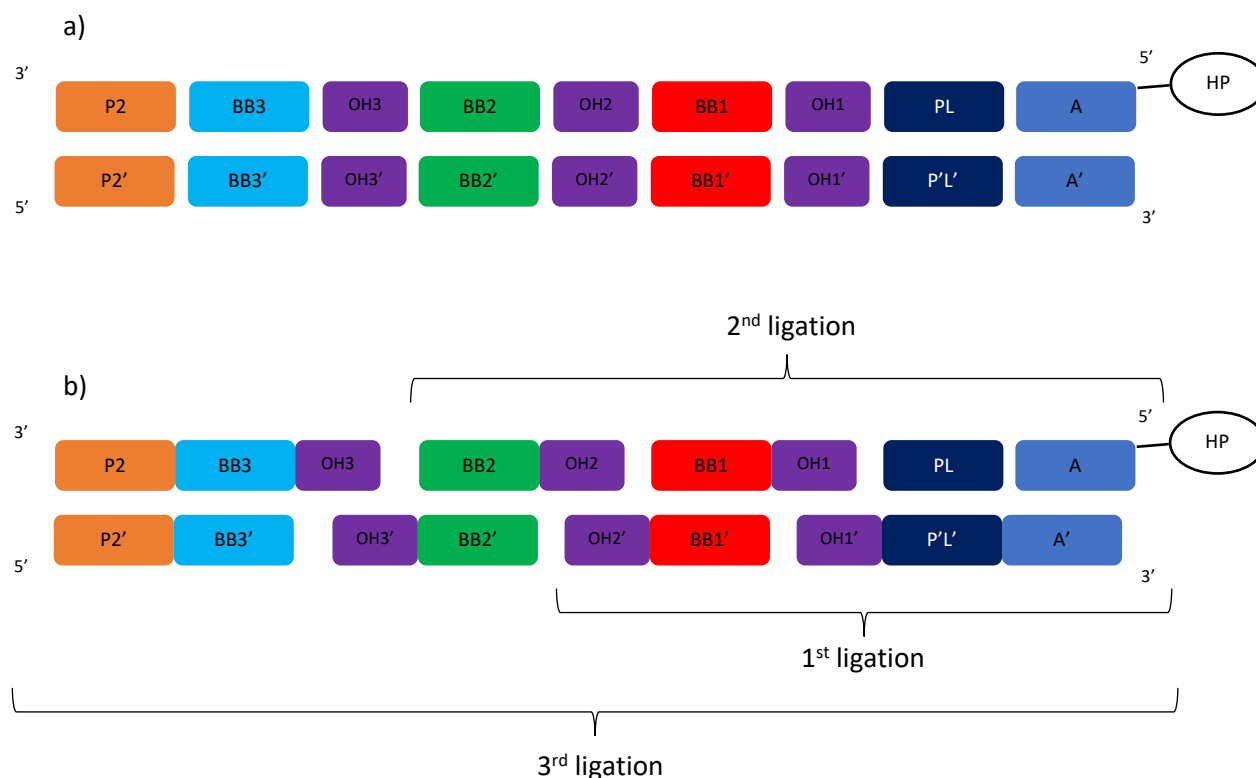

Cycle 1:

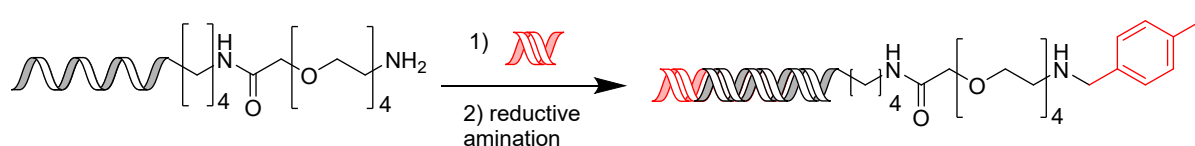

To individual Applied Biosystems™ MicroAmp® 96-well Reaction Plate wells was added the following DNA sequences (10 nmol total): P (AGGTCGGTGTGAACGGATTTGAGTCGCGGAA), OH1BB1 (GTATAGTGCAATTCA) and A'P'OH1' (GAATTCGGCAAGAC TTCCGCGACTCAAATCCGTTTACACCGACCT ATAC) (10  $\mu$ L, 1 nmol), which were combined with ATP (2  $\mu$ L, 10 mM in H<sub>2</sub>O), PNK reaction buffer (2  $\mu$ L, 500 mM Tris-HCl [pH 7.6 at 25 °C], 100 mM MgCl<sub>2</sub>, 50 mM DTT, 1 mM spermidine), T4 Polynucleotide Kinase (1  $\mu$ L, 10 U/ $\mu$ L) and DEPC-treated water (5  $\mu$ L). The reaction was conducted at 37 °C for 1 h, followed by heating to 75 °C for 10 mins. DNA was used in subsequent ligation without further purification.

20  $\mu$ L of each phosphorylation reaction was added to non-phosphorylated DNA sequences A (GTCTTGCCGAATTC) (5  $\mu$ L, 1 nmol) and OH2'BB1' (TAGG TGAATGCACT) (10  $\mu$ L, 1 nmol). To the DNA sequences was added 10X T4 DNA ligase buffer (9  $\mu$ L, 400 mM Tris-HCl, 100 mM MgCl<sub>2</sub>, 100 mM DTT, 5 mM ATP), T4 DNA ligase (1.5  $\mu$ L, 30 U/ $\mu$ L) and DEPC-treated water (4.5  $\mu$ L). The reactions were

conducted at 37 °C for 16 h followed by heating to 75 °C for 10 mins. The product was then visualised by gel electrophoresis, showing a band between 50 and 75 base pairs (expected 59 base pairs), before being purified according to the general ethanol precipitation procedure. The resulting pellet was reconstituted in water (5 µL) for the reductive amination step.

The double-stranded DNA was reacted with 4-iodobenzaldehyde according to the general on-DNA reductive amination procedure to give 8.7 nmol DNA product following ethanol precipitation.

Figure S206: Gel electrophoresis visualisation of 1<sup>st</sup> ligation showing a band between 50 and 75 base pairs in length (expected 59 base pairs).

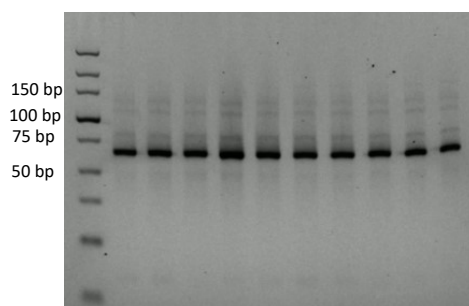

Cycle 2:

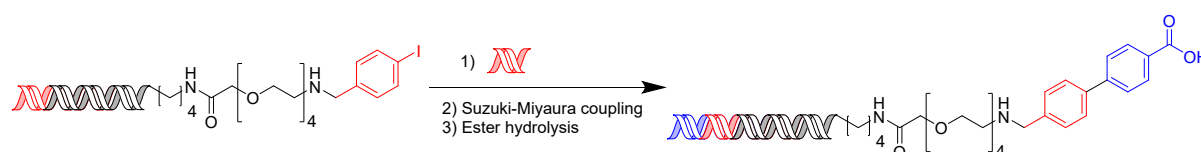

To individual Applied Biosystems™ MicroAmp® 96-well Reaction Plate wells was added DNA sequences cycle 1 product (10 µL, 1.1 nmol) and OH2BB2 (CCTA TGTCGCATTA) (10 µL, 1 nmol), which were combined with ATP (2 µL, 10 mM in H<sub>2</sub>O), PNK reaction buffer (2 µL, 500 mM Tris-HCl [pH 7.6 at 25 °C], 100 mM MgCl<sub>2</sub>, 50 mM DTT, 1 mM spermidine), T4 Polynucleotide Kinase (1 µL, 10 U/µL) and DEPC-treated water (5 µL). The reaction was conducted at 37 °C for 1 h, followed by heating to 75 °C for 10 mins. DNA was used in subsequent ligation without further purification.

22 µL of the combined phosphorylation reaction of OH2BB2 and 20 µL of the combined phosphorylation reaction of cycle 1 product (1.1 nmol) were added to non-phosphorylated DNA sequence OH3'BB2' (CGTA AGCCTAGCGG) (11 µL, 1.1 nmol). To the DNA sequences was added 10X T4 DNA ligase buffer (9 µL, 400 mM Tris-HCl, 100 mM MgCl<sub>2</sub>, 100 mM DTT, 5 mM ATP), T4 DNA ligase (1.5 µL, 30 U/µL) and DEPC-treated water (26.5 µL). The reactions were conducted at 37 °C for 16 h followed by heating to 75 °C for 10 mins. The product was then visualised by gel electrophoresis, showing a band around 75 base pairs (expected 73 base pairs), before being purified according to the general ethanol precipitation procedure. The resulting pellet was reconstituted in water (12 µL) for the Suzuki-Miyaura step.

The double-stranded DNA was reacted with (4-(ethoxycarbonyl)phenyl)boronic acid according to the general on-DNA Suzuki-Miyaura Cross-Coupling procedure to give DNA product (4.7 nmol).

To the DNA product (4.7 nmol in 50 µL H<sub>2</sub>O) was added LiOH·H<sub>2</sub>O (50 µL, 0.5 M in H<sub>2</sub>O) and the reaction mixture stirred at room temperature at 800 rpm for 30 mins. The solution was added to an Amicon

Ultra-0.5 Centrifugal 10 kDa Cut-off Filter Unit, DEPC-treated water (200  $\mu$ L was added and the solution centrifuged at room temperature for 10 mins. DEPC-treated water (200  $\mu$ L) was added to the filter and the mixture centrifuged at room temperature for 10 mins. This was repeated 2 more times, then the filter was inverted and centrifuged at 4,300 rpm at room temperature for 2 mins to yield the aqueous DNA product (4.6 nmol).

Figure S207: Gel electrophoresis visualisation of 2<sup>nd</sup> ligation showing a band around 75 base pairs in length (expected 73 base pairs).

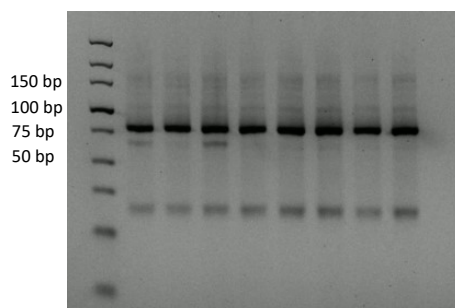

### Cycle 3:

To individual Applied Biosystems™ MicroAmp® 96-well Reaction Plate wells was added DNA sequences cycle 2 product (10  $\mu$ L, 0.92 nmol) and OH3BB3P2 (TACG ATAGAGGGTC TGACCTCAACTACATGGTCTACA) (10  $\mu$ L, 1 nmol), which were combined with ATP (2  $\mu$ L, 10 mM in H<sub>2</sub>O), PNK reaction buffer (2  $\mu$ L, 500 mM Tris-HCl [pH 7.6 at 25 °C], 100 mM MgCl<sub>2</sub>, 50 mM DTT, 1 mM spermidine), T4 Polynucleotide Kinase (1  $\mu$ L, 10 U/ $\mu$ L) and DEPC-treated water (5  $\mu$ L). The reaction was conducted at 37 °C for 1 h, followed by heating to 75 °C for 10 mins. DNA was used in subsequent ligation without further purification.

18.4  $\mu$ L of the combined phosphorylation reaction of OH3BB3P2 and 20  $\mu$ L of the combined phosphorylation reaction of the cycle 2 product (0.92 nmol) were added to non-phosphorylated P2'BB3' (TGTAGACCATGTAGTTGAGGTCA GTAAGACCTC) (9.2  $\mu$ L, 0.92 nmol). To the DNA sequences was added 10X T4 DNA ligase buffer (9  $\mu$ L, 400 mM Tris-HCl, 100 mM MgCl<sub>2</sub>, 100 mM DTT, 5 mM ATP), T4 DNA ligase (1.5  $\mu$ L, 30 U/ $\mu$ L) and DEPC-treated water (31.9  $\mu$ L). The reactions were conducted at 37 °C for 16 h followed by heating to 75 °C for 10 mins. The product was then visualised by gel electrophoresis, showing a band just above 100 base pairs (expected 110 base pairs), before being purified according to the general ethanol precipitation procedure. The resulting pellet was reconstituted in water (4  $\mu$ L) for the reverse amide step.

The double stranded DNA was reacted with benzylamine according to the general on-DNA reverse amide coupling procedure to give DNA product (1.65 nmol).

Figure S208: Gel electrophoresis visualisation of 3<sup>rd</sup> ligation showing a band just above 100 base pairs in length (expected 110 base pairs).

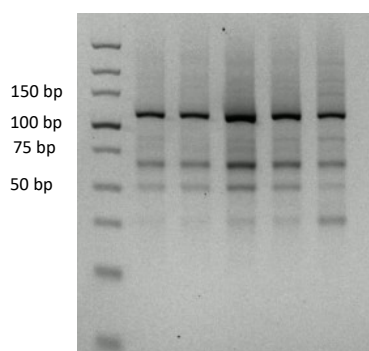

### PCR Amplification and Sequencing:

PCR amplification was performed in a 200  $\mu$ L PCR tube. Library DNA (1 pmol, 20  $\mu$ L), combined PCR primer and reverse PCR primer (2  $\mu$ L, 10  $\mu$ M in H<sub>2</sub>O), DEPC-treated H<sub>2</sub>O (3  $\mu$ L) and Applied Biosystems™ AmpliTaq Gold™ 360 Master Mix (25  $\mu$ L) were combined and exposed to thermal cycling conditions consisting of 10 min at 95 °C, followed by 38 cycles of 30 s at 95 °C, 30 s at 55°C, and 1 min at 72°C, with a final extension time of 420 s at 72°C. The PCR products were cleaned up using NucleoSpin Gel and PCR Clean-up Columns for gel extraction and PCR clean up (Macherey-Nagel, Item number: 740609.250) (according to manufacturer guidelines). The PCR product was visualised by gel electrophoresis showing a band just above 150 base pairs (expected 161 base pairs). The DNA was diluted to 21 ng/ $\mu$ L and analysed by NGS (Genewiz, South Plainfield, NJ, USA), 78% of 86,126 corresponded to the expected sequence.

Figure S209: Gel electrophoresis visualisation of PCR product showing a band just above 150 base pairs in length (expected 161 base pairs).

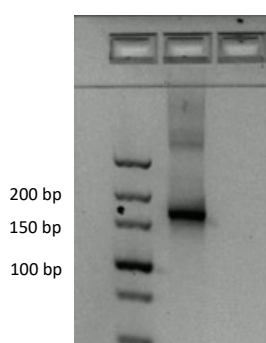

Sequences and frequencies of the top 10 most frequent reads for the substrate strand (total reads 86,126):

| Sequence     |                |            |            | Count  | Relative Frequency |
|--------------|----------------|------------|------------|--------|--------------------|
| Library Code | BB1 Code       | BB2 Code   | BB3 Code   |        |                    |
| AGTCGCGGAA   | AGTGCATTCA     | CCGCTAGGCT | GAGGTCTTAC | 66,760 | 0.775              |
| GTCGCGGAAG   | GTGCATTAC      | CGCTAGGCTT | AGGTCTTACT | 1,698  | 0.020              |
| AGTCGCGGAA   | TGCCGAATTC     | CGGTGTGAAC | TTGAGTCGCG | 1,416  | 0.016              |
| AGTCGCGGAA   | AGTGCATTCA     | CCGCTAGGCT | TGCCGAATTC | 773    | 0.009              |
| AGTCGCGGAA   | AGTGCATTCA     | TGCCGAATTC | CGGTGTGAAC | 675    | 0.008              |
| AGTCGCGGAA   | AGTGCATTCA     | CCGCTAGGCT | GAGGCCTTAC | 489    | 0.006              |
| AGTCGCGGAA   | AGTGCATTCA     | CCGCTAGGCT | TGCCGCATTC | 418    | 0.005              |
| GAGTCGCGGA   | TAGTGCATTC     | ACCCTAGGC  | GGAGGTCTTA | 314    | 0.004              |
| ACGAATCGTA   | AGGCGGCAG<br>A | GTAGAAGCGA | ACTGATTAGA | 221    | 0.003              |
| AGTCTTGCCG   | CAGGTCGGTG     | CGGATTTGAG | GGAAGTATAG | 217    | 0.003              |
